# Supplementary material for: Host Vesicle Fusion Protein VAPB Contributes to the Nuclear Egress Stage of Herpes Simplex Virus Type-1 (HSV-1) Replication
Source: Cells. 2019 Feb 3;8(2):120. doi: 10.3390/cells8020120 (PMC6406291; doi:10.3390/cells8020120)
Supplement: Supplementary file 1 [file cells-08-00120-s001.xlsx]

## Sheet: TableS1
Table S1: Detailed peptide and spectral counts for proteins detected by MudPIT analyses
						Column ends with:
						_P	Peptide Count						_S	Spectral Count
						_dS	Distributed Spectral Count						_sS	Shared Spectral Count
						_SC	Sequence Coverage (%)						_uS	Unique Spectral Count
						_dNSAF	Distributed Normalized Spectral Abundance Factor						_uDP	Unique Detected Peptides
dNSAF_Rank	Total Proteins In Group	Proteins In Group	Locus	Description	Gene	HSV1_MMs_P	HSV1_MMs_S	HSV1_MMs_uS	HSV1_MMs_uDP	HSV1_MMs_sS	HSV1_MMs_dS	HSV1_MMs_SC	HSV1_MMs_dNSAF	HSV1_MMs:Mock-MMs	Mock-MMs_P	Mock-MMs_S	Mock-MMs_uS	Mock-MMs_uDP	Mock-MMs_sS	Mock-MMs_dS	Mock-MMs_SC	Mock-MMs_dNSAF	Mock_NEs:Mock-MMs	Mock_NEs_P	Mock_NEs_S	Mock_NEs_uS	Mock_NEs_uDP	Mock_NEs_sS	Mock_NEs_dS	Mock_NEs_SC	Mock_NEs_dNSAF	Length	MW	pI	TMHMM_Topology	SIGNALP_NN_YMAX_POS	SIGNALP_NN_DSCORE	SIGNALP_HMM_TYPE	SIGNALP_HMM_POS	NCBI_Chromosome	NCBI_EC_Number	Region_Sources	NCBI_Region_Names	NCBI_Region_Notes	NCBI_Site_Sources	NCBI_Site_Types	NCBI_Site_Notes	NCBI_Go_Components	NCBI_Go_Functions
1	1	gi|820945296|ref|YP_009137141.1|	gi|820945296|ref|YP_009137141.1|	envelope glycoprotein D [Human herpesvirus 1]	US6	7	38	38	7	0	38	23.86	0.00303141	INF	X	X	X	X	X	X	X	X	0	X	X	X	X	X	X	X	X	394	43317	7.8								[63..374][82..206]	[PHA03264][Herpes_glycop_D]	[envelope glycoprotein D; Provisional][Herpesvirus glycoprotein D/GG/GX domain; pfam01537]
2	1	gi|820945257|ref|YP_009137102.1|	gi|820945257|ref|YP_009137102.1|	envelope glycoprotein B [Human herpesvirus 1]	UL27	14	62	62	14	0	62	23.12	0.00215566	INF	X	X	X	X	X	X	X	X	0	X	X	X	X	X	X	X	X	904	100264	8.1								[83..900]	[PHA03231]	[glycoprotein BALF4; Provisional]
3	1	gi|820945274|ref|YP_009137119.1|	gi|820945274|ref|YP_009137119.1|	envelope glycoprotein C [Human herpesvirus 1]	UL44	6	30	30	6	0	30	16.83	0.00184526	INF	X	X	X	X	X	X	X	X	0	X	X	X	X	X	X	X	X	511	55022	7.8								[1..511][<265..448]	[PHA03270][PHA03271]	[envelope glycoprotein C; Provisional][envelope glycoprotein C; Provisional]
4	1	gi|820945264|ref|YP_009137109.1|	gi|820945264|ref|YP_009137109.1|	nuclear egress membrane protein [Human herpesvirus 1]	UL34	4	15	15	4	0	15	25.82	0.00171442	INF	X	X	X	X	X	X	X	X	0	X	X	X	X	X	X	X	X	275	29790	10.5								[6..270]	[PHA03323]	[nuclear egress membrane protein UL34; Provisional]
5	1	gi|820945292|ref|YP_009137137.1|	gi|820945292|ref|YP_009137137.1|	virion protein US2 [Human herpesvirus 1]	US2	4	14	14	4	0	14	19.59	0.00151214	INF	X	X	X	X	X	X	X	X	0	X	X	X	X	X	X	X	X	291	32471	8.4								[1..>179][110..247]	[PHA03370][US2]	[virion protein US2; Provisional][US2 family; pfam02476]
6	1	gi|820945275|ref|YP_009137120.1|	gi|820945275|ref|YP_009137120.1|	membrane protein UL45 [Human herpesvirus 1]	UL45	2	7	7	2	0	7	18.02	0.00127917	INF	X	X	X	X	X	X	X	X	0	X	X	X	X	X	X	X	X	172	18180	8.3								[4..171]	[Herpes_UL45]	[UL45 protein; pfam05473]
7	1	gi|820945279|ref|YP_009137124.1|	gi|820945279|ref|YP_009137124.1|	tegument protein VP22 [Human herpesvirus 1]	UL49	4	11	11	4	0	11	24.25	0.00114864	INF	X	X	X	X	X	X	X	X	0	X	X	X	X	X	X	X	X	301	32254	10.5								[1..301][163..256]	[PHA03381][Herpes_UL49_2]	[tegument protein VP22; Provisional][Herpesvirus UL49 tegument protein; pfam04823]
8	1	gi|820945248|ref|YP_009137093.1|	gi|820945248|ref|YP_009137093.1|	major capsid protein [Human herpesvirus 1]	UL19	18	46	46	18	0	46	23.14	0.00105227	INF	X	X	X	X	X	X	X	X	0	X	X	X	X	X	X	X	X	1374	149069	6.5								[15..1374]	[Herpes_MCP]	[Herpes virus major capsid protein; pfam03122]
9	1	gi|820945278|ref|YP_009137123.1|	gi|820945278|ref|YP_009137123.1|	transactivating tegument protein VP16 [Human herpesvirus 1]	UL48	6	16	16	6	0	16	20.82	0.00102632	INF	X	X	X	X	X	X	X	X	0	X	X	X	X	X	X	X	X	490	54345	5								[1..490][29..382][461..490]	[PHA03380][Alpha_TIF][HSV_VP16_C]	[transactivating tegument protein VP16; Provisional][Alpha trans-inducing protein (Alpha-TIF); smart00814][Herpes simplex virus virion protein 16 C terminal; pfam12149]
10	1	gi|820945281|ref|YP_009137126.1|	gi|820945281|ref|YP_009137126.1|	deoxyuridine triphosphatase [Human herpesvirus 1]	UL50	3	12	12	3	0	12	17.25	0.00101663	INF	X	X	X	X	X	X	X	X	0	X	X	X	X	X	X	X	X	371	39128	8							3.6.1.23	[1..371][206..370]	[PHA03130][dUTPase]	[dUTPase; Provisional][dUTPase; pfam00692]	[order(219..220,230,235..236,238,258..263,268..270,279,282,]	[other]	[trimer interface [polypeptide binding]]
11	1	gi|820945298|ref|YP_009137143.1|	gi|820945298|ref|YP_009137143.1|	envelope glycoprotein E [Human herpesvirus 1]	US8	8	16	16	8	0	16	22	0.00091436	INF	X	X	X	X	X	X	X	X	0	X	X	X	X	X	X	X	X	550	59094	6.1								[1..550]	[PHA03282]	[envelope glycoprotein E; Provisional]
12	1	gi|820945247|ref|YP_009137092.1|	gi|820945247|ref|YP_009137092.1|	capsid triplex subunit 2 [Human herpesvirus 1]	UL18	4	9	9	4	0	9	22.96	0.00088956	INF	X	X	X	X	X	X	X	X	0	X	X	X	X	X	X	X	X	318	34271	6.2								[1..318]	[PHA03257]	[Capsid triplex subunit 2; Provisional]
13	1	gi|820945276|ref|YP_009137121.1|	gi|820945276|ref|YP_009137121.1|	tegument protein VP11/12 [Human herpesvirus 1]	UL46	7	19	19	7	0	19	17.13	0.00083174	INF	X	X	X	X	X	X	X	X	0	X	X	X	X	X	X	X	X	718	78241	8.9								[1..718][21..443]	[PHA03321][Herpes_UL46]	[tegument protein VP11/12; Provisional][Herpesvirus UL46 protein; pfam03387]
14	1	gi|820945277|ref|YP_009137122.1|	gi|820945277|ref|YP_009137122.1|	tegument protein VP13/14 [Human herpesvirus 1]	UL47	7	14	14	7	0	14	16.31	0.00063497	INF	X	X	X	X	X	X	X	X	0	X	X	X	X	X	X	X	X	693	73817	9.1								[233..669]	[Herpes_UL47]	[Herpesvirus UL47 protein; pfam03362]
15	1	gi|820945239|ref|YP_009137084.1|	gi|820945239|ref|YP_009137084.1|	envelope glycoprotein M [Human herpesvirus 1]	UL10	1	8	8	1	0	8	5.07	0.0005316	INF	X	X	X	X	X	X	X	X	0	X	X	X	X	X	X	X	X	473	51393	8.7								[1..440]	[PHA03242]	[envelope glycoprotein M; Provisional]
16	1	gi|820945272|ref|YP_009137117.1|	gi|820945272|ref|YP_009137117.1|	DNA polymerase processivity subunit [Human herpesvirus 1]	UL42	4	8	8	4	0	8	13.93	0.00051526	INF	X	X	X	X	X	X	X	X	0	X	X	X	X	X	X	X	X	488	51159	5.8								[31..169]	[Herpes_UL42]	[DNA polymerase processivity factor (UL42); pfam02282]
17	1	gi|820945297|ref|YP_009137142.1|	gi|820945297|ref|YP_009137142.1|	envelope glycoprotein I [Human herpesvirus 1]	US7	3	6	6	3	0	6	11.54	0.00048355	INF	X	X	X	X	X	X	X	X	0	X	X	X	X	X	X	X	X	390	41370	8.7								[2..372][3..166]	[PHA03291][Herpes_gI]	[envelope glycoprotein I; Provisional][Alphaherpesvirus glycoprotein I; pfam01688]
18	1	gi|820945270|ref|YP_009137115.1|	gi|820945270|ref|YP_009137115.1|	ribonucleotide reductase subunit 2 [Human herpesvirus 1]	UL40	3	5	5	3	0	5	14.71	0.00046222	INF	X	X	X	X	X	X	X	X	0	X	X	X	X	X	X	X	X	340	37961	5.3							1.17.4.1	[42..317]	[RNRR2]	[Ribonucleotide Reductase, R2/beta subunit, ferritin-like diiron-binding domain; cd01049]	[order(47,54,118..119,122,125..126,129,132,150..151,154)][order(58,94,124,127,131,219..220,224)][order(94,124,127,187,221,224)][131]	[other][other][other][other]	[dimer interface [polypeptide binding]][putative radical transfer pathway][diiron center [ion binding]][tyrosyl radical]
19	1	gi|820945236|ref|YP_009137081.1|	gi|820945236|ref|YP_009137081.1|	tegument protein UL7 [Human herpesvirus 1]	UL7	3	4	4	3	0	4	18.24	0.00042474	INF	X	X	X	X	X	X	X	X	0	X	X	X	X	X	X	X	X	296	33033	7.3								[1..296]	[PHA03361]	[UL7 tegument protein; Provisional]
20	1	gi|820945251|ref|YP_009137096.1|	gi|820945251|ref|YP_009137096.1|	envelope glycoprotein H [Human herpesvirus 1]	UL22	5	11	11	5	0	11	10.86	0.00041258	INF	X	X	X	X	X	X	X	X	0	X	X	X	X	X	X	X	X	838	90366	7.1								[1..838]	[PHA03294]	[envelope glycoprotein H; Provisional]
21	1	gi|820945261|ref|YP_009137106.1|	gi|820945261|ref|YP_009137106.1|	nuclear egress lamina protein [Human herpesvirus 1]	UL31	2	4	4	2	0	4	12.75	0.00041086	INF	X	X	X	X	X	X	X	X	0	X	X	X	X	X	X	X	X	306	33953	8.7								[2..306]	[PHA03328]	[nuclear egress lamina protein UL31; Provisional]
22	1	gi|820945259|ref|YP_009137104.1|	gi|820945259|ref|YP_009137104.1|	single-stranded DNA-binding protein [Human herpesvirus 1]	UL29	7	15	15	7	0	15	8.11	0.0003942	INF	X	X	X	X	X	X	X	X	0	X	X	X	X	X	X	X	X	1196	128348	6.5								[4..1196]	[PHA03362]	[single-stranded binding protein UL29; Provisional]
23	1	gi|820945269|ref|YP_009137114.1|	gi|820945269|ref|YP_009137114.1|	ribonucleotide reductase subunit 1 [Human herpesvirus 1]	UL39	8	14	14	8	0	14	12.05	0.00038701	INF	X	X	X	X	X	X	X	X	0	X	X	X	X	X	X	X	X	1137	124023	6.6							1.17.4.1	[491..576][537..1113][580..1113]	[Ribonuc_red_lgN][RNR_PFL][Ribonuc_red_lgC]	[Ribonucleotide reductase, all-alpha domain; pfam00317][Ribonucleotide reductase and Pyruvate formate lyase; cl09939][Ribonucleotide reductase, barrel domain; pfam02867]
24	1	gi|820945282|ref|YP_009137127.1|	gi|820945282|ref|YP_009137127.1|	tegument protein UL51 [Human herpesvirus 1]	UL51	2	3	3	2	0	3	10.25	0.00038645	INF	X	X	X	X	X	X	X	X	0	X	X	X	X	X	X	X	X	244	25436	6.3								[8..171]	[Herpes_UL51]	[Herpesvirus UL51 protein; pfam04540]
25	2	gi|820945290|ref|YP_009137135.1|;gi|820945304|ref|YP_009137149.1|	gi|820945290|ref|YP_009137135.1|	transcriptional regulator ICP4 [Human herpesvirus 1]	RS1	10	15	15	10	0	15	11.33	0.00036322	INF	X	X	X	X	X	X	X	X	0	X	X	X	X	X	X	X	X	1298	132913	6.5								[51..1245][326..484][812..1253]	[PHA03307][Herpes_ICP4_N][Herpes_ICP4_C]	[transcriptional regulator ICP4; Provisional][Herpesvirus ICP4-like protein N-terminal region; pfam03584][Herpesvirus ICP4-like protein C-terminal region; pfam03585]
26	1	gi|820945301|ref|YP_009137146.1|	gi|820945301|ref|YP_009137146.1|	virion protein US10 [Human herpesvirus 1]	US10	2	3	3	2	0	3	10.58	0.00030222	INF	X	X	X	X	X	X	X	X	0	X	X	X	X	X	X	X	X	312	34056	9								[<65..101][164..>310]	[Collagen][Gene66]	[Collagen triple helix repeat (20 copies); pfam01391][Gene 66 (IR5) protein; pfam02053]
27	1	gi|820945241|ref|YP_009137086.1|	gi|820945241|ref|YP_009137086.1|	deoxyribonuclease [Human herpesvirus 1]	UL12	4	6	6	4	0	6	10.86	0.00030126	INF	X	X	X	X	X	X	X	X	0	X	X	X	X	X	X	X	X	626	67508	7								[126..614]	[PHA03293]	[deoxyribonuclease; Provisional]
28	1	gi|820945285|ref|YP_009137130.1|	gi|820945285|ref|YP_009137130.1|	multifunctional expression regulator [Human herpesvirus 1]	UL54	3	4	4	3	0	4	7.42	0.00024555	INF	X	X	X	X	X	X	X	X	0	X	X	X	X	X	X	X	X	512	55223	6.9								[303..509]	[Herpes_UL69]	[Herpesvirus transcriptional regulator family; pfam05459]
29	1	gi|820945253|ref|YP_009137098.1|	gi|820945253|ref|YP_009137098.1|	nuclear protein UL24 [Human herpesvirus 1]	UL24	1	2	2	1	0	2	4.46	0.00023369	INF	X	X	X	X	X	X	X	X	0	X	X	X	X	X	X	X	X	269	29446	10.9								[1..259]	[PHA03215]	[nuclear protein UL24; Provisional]
30	1	gi|820945291|ref|YP_009137136.1|	gi|820945291|ref|YP_009137136.1|	regulatory protein ICP22 [Human herpesvirus 1]	US1	2	3	3	2	0	3	6.19	0.00022451	INF	X	X	X	X	X	X	X	X	0	X	X	X	X	X	X	X	X	420	46525	6.5								[160..291]	[Herpes_IE68]	[Herpesvirus immediate early protein; pfam02479]
31	1	gi|820945271|ref|YP_009137116.1|	gi|820945271|ref|YP_009137116.1|	tegument host shutoff protein [Human herpesvirus 1]	UL41	2	3	3	2	0	3	4.7	0.00019283	INF	X	X	X	X	X	X	X	X	0	X	X	X	X	X	X	X	X	489	54977	7.9								[179..261]	[XPG_I]	[XPG I-region; pfam00867]
32	1	gi|820945250|ref|YP_009137095.1|	gi|820945250|ref|YP_009137095.1|	tegument protein UL21 [Human herpesvirus 1]	UL21	1	3	3	1	0	3	3.74	0.00017625	INF	X	X	X	X	X	X	X	X	0	X	X	X	X	X	X	X	X	535	57642	7.8								[1..535]	[PHA03348]	[tegument protein UL21; Provisional]
33	1	gi|820945255|ref|YP_009137100.1|	gi|820945255|ref|YP_009137100.1|	capsid maturation protease [Human herpesvirus 1]	UL26	2	3	3	2	0	3	6.3	0.00014849	INF	X	X	X	X	X	X	X	X	0	X	X	X	X	X	X	X	X	635	66457	6.7							3.4.21.97	[21..>334][37..365]	[PHA03160][Peptidase_S21]	[hypothetical protein; Provisional][Assemblin (Peptidase family S21); pfam00716]
34	1	gi|820945268|ref|YP_009137113.1|	gi|820945268|ref|YP_009137113.1|	capsid triplex subunit 1 [Human herpesvirus 1]	UL38	1	2	2	1	0	2	3.87	0.00013519	INF	X	X	X	X	X	X	X	X	0	X	X	X	X	X	X	X	X	465	50263	8.7								[1..465][148..464]	[PHA03261][Herpes_VP19C]	[Capsid triplex subunit 1; Provisional][Herpesvirus capsid shell protein VP19C; pfam03327]
35	1	gi|820945254|ref|YP_009137099.1|	gi|820945254|ref|YP_009137099.1|	DNA packaging tegument protein UL25 [Human herpesvirus 1]	UL25	2	2	2	2	0	2	5.69	0.00010838	INF	X	X	X	X	X	X	X	X	0	X	X	X	X	X	X	X	X	580	62670	6.2								[1..580]	[PHA03248]	[DNA packaging tegument protein UL25; Provisional]
36	1	gi|300192933|ref|NP_006787.2|	gi|300192933|ref|NP_006787.2|	AFG3-like protein 2 [Homo sapiens]	AFG3L2	3	6	6	3	0	6	6.4	0.00023662	7.40625	2	2	2	2	0	2	3.39	3.193e-05	62.7812	12	39	39	12	0	39	19.2	0.00200908	797	88584	8.7						18		[146..242][253..746][341..477][562..744]	[FtsH_ext][FtsH_fam][AAA][Peptidase_M41]	[FtsH Extracellular; pfam06480][ATP-dependent metalloprotease FtsH; TIGR01241][The AAA+ (ATPases Associated with a wide variety of cellular Activities) superfamily represents an ancient group of ATPases belonging to the ASCE (for additional strand, catalytic E) division of the P-loop NTPase fold. The ASCE division also includes ABC; cd00009][Peptidase family M41; pfam01434]	[117][143..163][251..271][348..355][order(349..356,407,454)][403..408][468]	[modified][transmembrane region][transmembrane region][other][other][other][other]	[N6-succinyllysine. {ECO:0000250|UniProtKB:Q8JZQ2}; propagated from UniProtKB/Swiss-Prot (Q9Y4W6.2)][propagated from UniProtKB/Swiss-Prot (Q9Y4W6.2)][propagated from UniProtKB/Swiss-Prot (Q9Y4W6.2)][Walker A motif][ATP binding site [chemical binding]][Walker B motif][arginine finger]
37	1	gi|153945846|ref|NP_002215.2|	gi|153945846|ref|NP_002215.2|	inositol 1,4,5-trisphosphate receptor type 3 [Homo sapiens]	ITPR3	2	3	3	2	0	3	0.94	3.53e-05	7	1	1	1	1	0	1	0.45	4.76e-06	64.6	9	21	21	9	0	21	4.94	0.0003228	2671	304105	6.5	o2201-2223i2236-2255o2265-2287i2294-2311o2326-2348i2369-2391o2498-2520i	25	0.142	Q	21	6		[3..225][232..288][234..432][266..270][295..>348][471..676][507..510][567..569][1171..1345][1869..1979][2195..>2302]	[Ins145_P3_rec][MIR][MIR][Inositol 1,4,5-trisphosphate binding. {ECO:0000250}][MIR][RYDR_ITPR][Inositol 1,4,5-trisphosphate binding. {ECO:0000250}][Inositol 1,4,5-trisphosphate binding. {ECO:0000250}][RYDR_ITPR][RIH_assoc][Bax1-I]	[Inositol 1,4,5-trisphosphate/ryanodine receptor; pfam08709][Domain in ryanodine and inositol trisphosphate receptors and protein O-mannosyltransferases; smart00472][MIR domain; pfam02815][propagated from UniProtKB/Swiss-Prot (Q14573.2)][Domain in ryanodine and inositol trisphosphate receptors and protein O-mannosyltransferases; smart00472][RIH domain; pfam01365][propagated from UniProtKB/Swiss-P…	[916][934][1813][1832][2203..2223][2236..2256][2265..2285][2326..2346][2369..2389][2497..2517][2583][2670]	[phosphorylation][phosphorylation][phosphorylation][phosphorylation][transmembrane region][transmembrane region][transmembrane region][transmembrane region][transmembrane region][transmembrane region][phosphorylation][phosphorylation]	[Phosphoserine. {ECO:0000244|PubMed:18669648, ECO:0000244|PubMed:20068231}; propagated from UniProtKB/Swiss-Prot (Q14573.2)][Phosphoserine. {ECO:0000244|PubMed:18669648}; propagated from UniProtKB/Swiss-Prot (Q14573.2)][Phosphoserine. {ECO:0000244|PubMed:19690332}; propagated from UniProtKB/Swiss-Prot (Q14573.2)][Phosphoserine. {ECO:0000244|PubMed:18669648, ECO:0000244|PubMed:24275569}; propagate…
38	1	gi|307574674|ref|NP_001182606.1|	gi|307574674|ref|NP_001182606.1|	vesicle-associated membrane protein-associated protein B/C isoform 2 [Homo sapiens]	VAPB	3	8	6	2	2	7.2	28.28	0.00228589	6.29752	2	9	2	1	7	2.82353	14.14	0.00036288	8.98347	3	15	6	2	9	7.86207	38.38	0.00326057	99	11152	8.5						20		[8..>90]	[Motile_Sperm]	[MSP (Major sperm protein) domain; pfam00635]	[2]	[acetylation]	[N-acetylalanine; propagated from UniProtKB/Swiss-Prot (O95292.3)]
39	1	gi|385648268|ref|NP_001245308.1|	gi|385648268|ref|NP_001245308.1|	sodium bicarbonate cotransporter 3 isoform b [Homo sapiens]	SLC4A7	4	12	12	4	0	12	5.57	0.00033348	5.94643	2	5	5	2	0	5	3.09	5.625e-05	3.89286	4	6	6	4	0	6	5.13	0.00021781	1131	127359	6.8						3		[118..1016][146..413][455..969]	[ae][Band_3_cyto][HCO3_cotransp]	[anion exchange protein; TIGR00834][Band 3 cytoplasmic domain; pfam07565][HCO3- transporter family; pfam00955]
40	1	gi|548923795|ref|NP_001271318.1|	gi|548923795|ref|NP_001271318.1|	nucleolar and coiled-body phosphoprotein 1 isoform 3 [Homo sapiens]	NOLC1	1	2	2	1	0	2	3.43	8.98e-05	5	1	1	1	1	0	1	3.43	1.818e-05	26.5556	2	9	8	1	1	8.14815	5	0.00047792	700	73745	9.5						10		[69..83][85..567][205..383][385..588][602..618][624..697]	[Nuclear localization signal (Potential)][11 X 12 AA approximate repeats of an acidic serine cluster][Interacts with RPA194][Nuclear localization signal (Potential)][Nuclear localization signal (Potential)][SRP40_C]	[propagated from UniProtKB/Swiss-Prot (Q14978.2)][propagated from UniProtKB/Swiss-Prot (Q14978.2)][propagated from UniProtKB/Swiss-Prot (Q14978.2)][propagated from UniProtKB/Swiss-Prot (Q14978.2)][propagated from UniProtKB/Swiss-Prot (Q14978.2)][SRP40, C-terminal domain; pfam05022]	[33][88][91][92][367][398][416][509][539][564][581][583][608][611][623][644][664][687][699]	[acetylation][phosphorylation][phosphorylation][phosphorylation][phosphorylation][phosphorylation][acetylation][phosphorylation][phosphorylation][phosphorylation][phosphorylation][phosphorylation][phosphorylation][phosphorylation][phosphorylation][phosphorylation][acetylation][phosphorylation][phosphorylation]	[N6-acetyllysine; propagated from UniProtKB/Swiss-Prot (Q14978.2)][Phosphoserine; propagated from UniProtKB/Swiss-Prot (Q14978.2)][Phosphoserine; propagated from UniProtKB/Swiss-Prot (Q14978.2)][Phosphoserine; propagated from UniProtKB/Swiss-Prot (Q14978.2)][Phosphoserine; propagated from UniProtKB/Swiss-Prot (Q14978.2)][Phosphoserine; propagated from UniProtKB/Swiss-Prot (Q14978.2)][N6-acetyllys…
41	1	gi|4506265|ref|NP_000954.1|	gi|4506265|ref|NP_000954.1|	prostaglandin G/H synthase 2 precursor [Homo sapiens]	PTGS2	2	2	2	2	0	2	2.98	0.00010408	4.95238	1	1	1	1	0	1	2.65	2.107e-05	19.4286	1	6	6	1	0	6	2.65	0.00040785	604	68996	7.4	o	24	0.74	S	24	1	1.14.99.1	[19..54][75..562][122..560]	[EGF_CA][prostaglandin_endoperoxide_synthase][An_peroxidase]	[Calcium-binding EGF-like domain, present in a large number of membrane-bound and extracellular (mostly animal) proteins. Many of these proteins require calcium for their biological function and calcium-binding sites have been found to be located at the...; cd00054][Animal prostaglandin endoperoxide synthase and related bacterial proteins; cd09816][Animal haem peroxidase; pfam03098]	[order(20,34)][order(103,191,331,334..335,339,341,367,371,373,504,508,][order(111,113..115,122..126,128,215,305..309,312..313,316,][order(134,185,189,193,196..198,281,368,371..374,377,394,][516][526]	[other][other][other][other][other][nitrosylation]	[Ca2+ binding site [ion binding]][substrate binding site [chemical binding]][homodimer interface [polypeptide binding]][heme binding site [chemical binding]][Aspirin-acetylated serine. {ECO:0000250}; propagated from UniProtKB/Swiss-Prot (P35354.2)][S-nitrosocysteine. {ECO:0000305|PubMed:16373578}; propagated from UniProtKB/Swiss-Prot (P35354.2)]
42	2	gi|223468574|ref|NP_001138621.1|;gi|5032137|ref|NP_005629.1|	gi|223468574|ref|NP_001138621.1|	vesicle-associated membrane protein 7 isoform 2 [Homo sapiens]	VAMP7	2	4	4	2	0	4	18.99	0.00070237	4.94366	1	2	2	1	0	2	12.29	0.00014216	17.7676	3	11	11	3	0	11	27.37	0.00252308	179	20121	9.3	o149-171i	17	0.483	S	17	X;Y		[<27..68][83..>149][83..147]	[Longin][Synaptobrevin][R-SNARE_VAMP7]	[Regulated-SNARE-like domain; pfam13774][Synaptobrevin; pfam00957][SNARE motif of VAMP7; cd15871]	[order(83..84,87..88,90..92,94..99,101..103,105..106,][109]	[other][other]	[heterotetramer interface [polypeptide binding]][zero layer]
43	1	gi|32528301|ref|NP_004435.3|	gi|32528301|ref|NP_004435.3|	ephrin type-B receptor 4 precursor [Homo sapiens]	EPHB4	4	10	5	1	5	7.19007	5.37	0.00022897	4.87234	4	7	2	2	5	3.66667	6.38	4.727e-05	4.95745	6	10	2	1	8	5.6	8.21	0.00023295	987	108270	6.9	o541-563i	16	0.762	S	16	7	2.7.10.1	[17..196][268..>321][288..321][324..429][434..526][<564..612][610..878][615..874][904..971][907..973][985..987]	[EphR_LBD_B4][TNFRSF][CRD2][FN3][FN3][EphA2_TM][PTKc_EphR_B][Pkinase_Tyr][SAM][SAM_EPH-B4][PDZ-binding (Potential)]	[Ligand Binding Domain of Ephrin type-B Receptor 4; cd10474][Tumor necrosis factor receptor superfamily (TNFRSF); cl22855][CRD2 [structural motif]][Fibronectin type 3 domain; One of three types of internal repeats found in the plasma protein fibronectin. Its tenth fibronectin type III repeat contains an RGD cell recognition sequence in a flexible loop between 2 strands. Approximately 2% of all...…	[order(27,29,43..46,48..50,52,54,56,59..60,93,95,147,149,][order(324,398,413)][order(417..418,421..422)][order(434,499,514)][order(515..516,518..519)][540..560][order(621..625,629,645,647,693..694,696,700,740,744..745,][order(621..623,625,629,645,647,693..694,696,700,745,747,][order(740,744,779..783,792,826)][757..785][911][order(924,957)][976][987]	[other][other][other][other][other][transmembrane region][active][other][other][other][phosphorylation][other][phosphorylation][phosphorylation]	[ephrin binding site [polypeptide binding]][Interdomain contacts][Cytokine receptor motif][Interdomain contacts][Cytokine receptor motif][propagated from UniProtKB/Swiss-Prot (P54760.2)][][ATP binding site [chemical binding]][polypeptide substrate binding site [polypeptide binding]][activation loop (A-loop)][Phosphoserine; propagated from UniProtKB/Swiss-Prot (P54760.2)][putative phosphorylation …
44	1	gi|526118265|ref|NP_005104.3|	gi|526118265|ref|NP_005104.3|	Golgin subfamily A member 5 [Homo sapiens]	GOLGA5	1	3	3	1	0	3	2.19	0.00012899	3.68571	1	2	2	1	0	2	2.19	3.481e-05	35.3143	7	22	22	7	0	22	12.86	0.00123565	731	82990	5.8						14		[235..711][<479..549]	[Golgin_A5][DUF342]	[Golgin subfamily A member 5; pfam09787][Protein of unknown function (DUF342); cl19219]	[2][89][116][497..498][699..719]	[acetylation][methylation][phosphorylation][other][transmembrane region]	[N-acetylserine. {ECO:0000269|PubMed:22223895}; propagated from UniProtKB/Swiss-Prot (Q8TBA6.3)][Dimethylated arginine, alternate. {ECO:0000250|UniProtKB:Q3ZU82}; Omega-N-methylated arginine, alternate. {ECO:0000250}; propagated from UniProtKB/Swiss-Prot (Q8TBA6.3)][Phosphoserine. {ECO:0000269|PubMed:17081983, ECO:0000269|PubMed:18669648, ECO:0000269|PubMed:21406692, ECO:0000269|PubMed:24275569};…
45	1	gi|62632750|ref|NP_055431.1|	gi|62632750|ref|NP_055431.1|	probable phospholipid-transporting ATPase IF [Homo sapiens]	ATP11B	1	3	3	1	0	3	1.87	8.011e-05	3.63636	2	2	2	2	0	2	2.8	2.162e-05	14.2727	3	9	9	3	0	9	3.82	0.00031395	1177	134190	7	i66-88o285-307i339-361o865-884i961-983o993-1015i1027-1049o1064-1086i	20	0.145	Q	20	3	3.6.3.1	[39..1106][94..>307][493..605][677..838][954..>1081]	[ATPase-Plipid][E1-E2_ATPase][Hydrolase_like2][HAD_like][UgpA]	[phospholipid-translocating P-type ATPase, flippase; TIGR01652][E1-E2 ATPase; pfam00122][Putative hydrolase of sodium-potassium ATPase alpha subunit; pfam13246][Haloacid dehalogenase-like hydrolases. The haloacid dehalogenase-like (HAD) superfamily includes L-2-haloacid dehalogenase, epoxide hydrolase, phosphoserine phosphatase, phosphomannomutase, phosphoglycolate phosphatase, P-type ATPase, and…	[56..77][83..104][290..311][342..359][706][877..898][911..930][961..982][998..1020][1026..1047][1066..1090][1154]	[transmembrane region][transmembrane region][transmembrane region][transmembrane region][other][transmembrane region][transmembrane region][transmembrane region][transmembrane region][transmembrane region][transmembrane region][phosphorylation]	[propagated from UniProtKB/Swiss-Prot (Q9Y2G3.2)][propagated from UniProtKB/Swiss-Prot (Q9Y2G3.2)][propagated from UniProtKB/Swiss-Prot (Q9Y2G3.2)][propagated from UniProtKB/Swiss-Prot (Q9Y2G3.2)][motif II][propagated from UniProtKB/Swiss-Prot (Q9Y2G3.2)][propagated from UniProtKB/Swiss-Prot (Q9Y2G3.2)][propagated from UniProtKB/Swiss-Prot (Q9Y2G3.2)][propagated from UniProtKB/Swiss-Prot (Q9Y2G3.…
46	1	gi|4506675|ref|NP_002941.1|	gi|4506675|ref|NP_002941.1|	dolichyl-diphosphooligosaccharide--protein glycosyltransferase subunit 1 precursor [Homo sapiens]	RPN1	6	57	57	6	0	57	18.78	0.00295151	3.61322	9	39	39	9	0	39	23.72	0.00081749	1.49082	7	18	18	7	0	18	14.99	0.00121752	607	68569	6.4	o440-459i	25	0.742	S	25	3	2.4.99.18	[31..458]	[Ribophorin_I]	[Ribophorin I; pfam04597]	[187][439..457]	[acetylation][transmembrane region]	[N6-acetyllysine; propagated from UniProtKB/Swiss-Prot (P04843.1)][propagated from UniProtKB/Swiss-Prot (P04843.1)]
47	1	gi|21264345|ref|NP_006253.2|	gi|21264345|ref|NP_006253.2|	peripherin [Homo sapiens]	PRPH	3	90	88	2	2	89.6604	6.17	0.00599598	3.03441	2	73	73	2	0	73	4.47	0.0019762	1.81275	2	41	41	2	0	41	4.47	0.0035816	470	53651	5.5	o	23	0.114	Q	55	12		[1..99][13..95][96..406][100..405][100..132][133..143][144..239][<199..373][240..262][263..405][406..470]	[Head][Filament_head][Filament][Rod][Coil 1A][Linker 1][Coil 1B][BAR][Linker 2][Coil 2][Tail]	[propagated from UniProtKB/Swiss-Prot (P41219.2)][Intermediate filament head (DNA binding) region; pfam04732][Intermediate filament protein; pfam00038][propagated from UniProtKB/Swiss-Prot (P41219.2)][propagated from UniProtKB/Swiss-Prot (P41219.2)][propagated from UniProtKB/Swiss-Prot (P41219.2)][propagated from UniProtKB/Swiss-Prot (P41219.2)][The Bin/Amphiphysin/Rvs (BAR) domain, a dimerizatio…	[17][28][50][order(207,210..211,316,319..320,332,334,337..338,340..341,][379][470][470]	[modified][phosphorylation][phosphorylation][other][modified][phosphorylation][phosphorylation]	[Nitrated tyrosine. {ECO:0000250|UniProtKB:P21807}; propagated from UniProtKB/Swiss-Prot (P41219.2)][Phosphoserine. {ECO:0000250|UniProtKB:P21807}; propagated from UniProtKB/Swiss-Prot (P41219.2)][Phosphoserine. {ECO:0000250|UniProtKB:P21807}; propagated from UniProtKB/Swiss-Prot (P41219.2)][dimer interface [polypeptide binding]][Nitrated tyrosine. {ECO:0000250|UniProtKB:P21807}; propagated from …
48	1	gi|23199983|ref|NP_005473.1|	gi|23199983|ref|NP_005473.1|	GPI-anchor transamidase precursor [Homo sapiens]	PIGK	1	1	1	1	0	1	2.53	7.957e-05	2.5	1	1	1	1	0	1	8.61	3.221e-05	116.938	5	36	36	5	0	36	17.97	0.00374194	395	45252	6.2	i7-29o364-383i	28	0.867	S	28	1	3.-.-.-	[42..331][311..321]	[CASc][Essential for GPI attachment]	[Caspase, interleukin-1 beta converting enzyme (ICE) homologues; Cysteine-dependent aspartate-directed proteases that mediate programmed cell death (apoptosis). Caspases are synthesized as inactive zymogens and activated by proteolysis of the peptide...; cl00042][propagated from UniProtKB/Swiss-Prot (Q92643.2)]	[368..388]	[transmembrane region]	[propagated from UniProtKB/Swiss-Prot (Q92643.2)]
49	5	gi|18104967|ref|NP_000953.2|;gi|18104969|ref|NP_542158.1|;gi|403310639|ref|NP_001258093.1|;gi|403310641|ref|NP_001258094.1|;gi|406035321|ref|NP_001258296.1|	gi|18104967|ref|NP_000953.2|	prostaglandin G/H synthase 1 isoform 1 precursor [Homo sapiens]	PTGS1	1	2	2	1	0	2	3.01	0.00010494	2.5	1	2	2	1	0	2	3.01	4.248e-05	9.78571	1	6	6	1	0	6	4.34	0.00041126	599	68686	7.2	i5-24o	25	0.818	S	25	9	1.14.99.1	[32..69][89..575][145..581]	[EGF_CA][prostaglandin_endoperoxide_synthase][An_peroxidase]	[Calcium-binding EGF-like domain, present in a large number of membrane-bound and extracellular (mostly animal) proteins. Many of these proteins require calcium for their biological function and calcium-binding sites have been found to be located at the...; cd00054][Animal prostaglandin endoperoxide synthase and related bacterial proteins; cd09816][Animal haem peroxidase; pfam03098]	[order(34,48)][order(116,204,344,347..348,352,354,380,384,386,517,521,][order(124,126..128,135..139,141,228,318..322,325..326,329,][143][order(147,198,202,206,209..211,294,381,384..387,390,407,][409][529]	[other][other][other][glycosylation][other][glycosylation][other]	[Ca2+ binding site [ion binding]][substrate binding site [chemical binding]][homodimer interface [polypeptide binding]][][heme binding site [chemical binding]][][Aspirin-acetylated serine; propagated from UniProtKB/Swiss-Prot (P23219.2)]
50	1	gi|41393554|ref|NP_958815.1|	gi|41393554|ref|NP_958815.1|	putative RNA-binding protein Luc7-like 1 isoform b [Homo sapiens]	LUC7L	1	1	1	1	0	1	4.31	8.472e-05	2.5	1	1	1	1	0	1	4.31	3.43e-05	16.7353	3	6	4	2	2	5.14286	9.7	0.00056914	371	43728	9.9	o	22	0.125	Q	22	16		[4..239][5..230]	[LUC7][LUC7]	[LUC7 N_terminus; pfam03194][U1 snRNP component, mediates U1 snRNP association with cap-binding complex [RNA processing and modification]; COG5200]	[363][363]	[phosphorylation][phosphorylation]	[][Phosphoserine. {ECO:0000244|PubMed:17081983, ECO:0000244|PubMed:19690332, ECO:0000244|PubMed:20068231, ECO:0000244|PubMed:21406692}; propagated from UniProtKB/Swiss-Prot (Q9NQ29.1)]
51	1	gi|190194386|ref|NP_064508.3|	gi|190194386|ref|NP_064508.3|	transmembrane 9 superfamily member 3 precursor [Homo sapiens]	TM9SF3	1	2	2	1	0	2	1.87	0.00010673	2.48837	1	2	2	1	0	2	1.87	4.32e-05	27.5581	6	17	17	6	0	17	11.71	0.00118502	589	67888	7.2						10		[56..547]	[EMP70]	[Endomembrane protein 70; pfam02990]	[224..244][294..314][328..348][360..380][389..409][449..469][482..502][519..539][551..571]	[transmembrane region][transmembrane region][transmembrane region][transmembrane region][transmembrane region][transmembrane region][transmembrane region][transmembrane region][transmembrane region]	[propagated from UniProtKB/Swiss-Prot (Q9HD45.2)][propagated from UniProtKB/Swiss-Prot (Q9HD45.2)][propagated from UniProtKB/Swiss-Prot (Q9HD45.2)][propagated from UniProtKB/Swiss-Prot (Q9HD45.2)][propagated from UniProtKB/Swiss-Prot (Q9HD45.2)][propagated from UniProtKB/Swiss-Prot (Q9HD45.2)][propagated from UniProtKB/Swiss-Prot (Q9HD45.2)][propagated from UniProtKB/Swiss-Prot (Q9HD45.2)][propag…
52	1	gi|5453704|ref|NP_006398.1|	gi|5453704|ref|NP_006398.1|	PRA1 family protein 3 [Homo sapiens]	ARL6IP5	1	4	4	1	0	4	5.85	0.00066874	2.46863	1	4	4	1	0	4	5.85	0.00027071	4.02952	1	5	5	1	0	5	5.85	0.00109195	188	21615	9.8	i36-58o62-84i104-126o	25	0.071	Q	0	3		[5..156][136..188]	[PRA1][Targeting to endoplasmic reticulum membrane. {ECO:0000250}]	[PRA1 family protein; pfam03208][propagated from UniProtKB/Swiss-Prot (O75915.1)]	[1][36..56][57..77][94..114][115..135]	[acetylation][transmembrane region][transmembrane region][transmembrane region][transmembrane region]	[N-acetylmethionine. {ECO:0000244|PubMed:22223895, ECO:0000244|PubMed:22814378, ECO:0000269|PubMed:12665801, ECO:0000269|Ref.14}; propagated from UniProtKB/Swiss-Prot (O75915.1)][propagated from UniProtKB/Swiss-Prot (O75915.1)][propagated from UniProtKB/Swiss-Prot (O75915.1)][propagated from UniProtKB/Swiss-Prot (O75915.1)][propagated from UniProtKB/Swiss-Prot (O75915.1)]
53	1	gi|170014689|ref|NP_065828.2|	gi|170014689|ref|NP_065828.2|	VPS10 domain-containing receptor SorCS2 precursor [Homo sapiens]	SORCS2	1	2	2	1	0	2	1.38	5.424e-05	2.45455	2	2	2	2	0	2	1.73	2.196e-05	12.8636	5	8	8	5	0	8	4.57	0.0002834	1159	128151	7.1						4		[170..776][182..193][232..243][273..284][468..479][545..556][587..598][787..863]	[VPS10][BNR 1][BNR 2][BNR 3][BNR 4][BNR 5][BNR 6][PKD]	[VPS10 domain; smart00602][propagated from UniProtKB/Swiss-Prot (Q96PQ0.3)][propagated from UniProtKB/Swiss-Prot (Q96PQ0.3)][propagated from UniProtKB/Swiss-Prot (Q96PQ0.3)][propagated from UniProtKB/Swiss-Prot (Q96PQ0.3)][propagated from UniProtKB/Swiss-Prot (Q96PQ0.3)][propagated from UniProtKB/Swiss-Prot (Q96PQ0.3)][PKD domain; pfam00801]	[1079..1099]	[transmembrane region]	[propagated from UniProtKB/Swiss-Prot (Q96PQ0.3)]
54	1	gi|19923729|ref|NP_115646.2|	gi|19923729|ref|NP_115646.2|	leucine-rich repeat-containing protein 8C [Homo sapiens]	LRRC8C	1	2	2	1	0	2	1.25	7.828e-05	2.4375	1	2	2	1	0	2	1.49	3.169e-05	8	4	5	5	4	0	5	6.72	0.00025565	803	92391	7.7	o26-48i126-148o262-284i319-341o	43	0.304	A	46	1		[1..65][99..158][397..419][420..443][446..468][446..465][468..490][469..492][492..513][493..515][515..536][516..543][543..563][544..566][566..586][567..590][589..649][589..630][590..611][591..613][613..653][613..634][614..638][637..695][638..677][638..659][639..661][661..682][662..684][684..741][684..705][707..728][708..730][730..751][731..752][753..774][776..799]	[DUF3733][DUF3733][LRR 1][LRR 2][leucine-rich repeat][LRR 3][LRR 4][leucine-rich repeat][LRR 5][leucine-rich repeat][LRR 6][leucine-rich repeat][LRR 7][leucine-rich repeat][LRR 8][leucine-rich repeat][LRR_8][LRR_4][LRR 9][leucine-rich repeat][LRR_4][LRR 10][leucine-rich repeat][LRR_8][LRR_4][LRR 11][leucine-rich repeat][LRR 12][leucine-rich repeat][LRR_8][LRR 13][LRR 14][leucine-rich repeat][LRR …	[Leucine-rich repeat containing protein 8; pfam12534][Leucine-rich repeat containing protein 8; pfam12534][propagated from UniProtKB/Swiss-Prot (Q8TDW0.2)][propagated from UniProtKB/Swiss-Prot (Q8TDW0.2)][leucine-rich repeat [structural motif]][propagated from UniProtKB/Swiss-Prot (Q8TDW0.2)][propagated from UniProtKB/Swiss-Prot (Q8TDW0.2)][leucine-rich repeat [structural motif]][propagated from …	[1][23..43][126..146][198][212][215][267..287][321..341][687]	[acetylation][transmembrane region][transmembrane region][phosphorylation][phosphorylation][phosphorylation][transmembrane region][transmembrane region][phosphorylation]	[N-acetylmethionine. {ECO:0000250|UniProtKB:Q8IWT6}; propagated from UniProtKB/Swiss-Prot (Q8TDW0.2)][propagated from UniProtKB/Swiss-Prot (Q8TDW0.2)][propagated from UniProtKB/Swiss-Prot (Q8TDW0.2)][Phosphothreonine. {ECO:0000250|UniProtKB:Q80WG5}; propagated from UniProtKB/Swiss-Prot (Q8TDW0.2)][Phosphoserine. {ECO:0000250|UniProtKB:Q498T9}; propagated from UniProtKB/Swiss-Prot (Q8TDW0.2)][Phos…
55	1	gi|4758950|ref|NP_000933.1|	gi|4758950|ref|NP_000933.1|	peptidyl-prolyl cis-trans isomerase B precursor [Homo sapiens]	PPIB	6	18	18	6	0	18	35.19	0.00261925	2.22326	6	20	20	6	0	20	29.17	0.0011781	1.12988	3	7	7	3	0	7	17.59	0.00133056	216	23743	9.4	i11-33o	34	0.804	S	34	15	5.2.1.8	[45..203][213..216]	[cyclophilin_ABH_like][Prevents secretion from ER]	[cyclophilin_ABH_like: Cyclophilin A, B and H-like cyclophilin-type peptidylprolyl cis- trans isomerase (PPIase) domain. This family represents the archetypal cystolic cyclophilin similar to human cyclophilins A, B and H. PPIase is an enzyme which...; cd01926][propagated from UniProtKB/Swiss-Prot (P23284.2)]	[84][order(94..95,100,151,153,161)][165][202][202][209][209]	[modified][active][acetylation][nitrosylation][modified][acetylation][modified]	[N6-succinyllysine. {ECO:0000250|UniProtKB:Q99KR7}; propagated from UniProtKB/Swiss-Prot (P23284.2)][][N6-acetyllysine. {ECO:0000250|UniProtKB:Q99KR7}; propagated from UniProtKB/Swiss-Prot (P23284.2)][S-nitrosocysteine. {ECO:0000250|UniProtKB:Q99KR7}; propagated from UniProtKB/Swiss-Prot (P23284.2)][S-nitrosylation site][N6-acetyllysine, alternate. {ECO:0000250|UniProtKB:P24369}; propagated from …
56	1	gi|27436946|ref|NP_733821.1|	gi|27436946|ref|NP_733821.1|	lamin isoform A [Homo sapiens]	LMNA	7	21	21	7	0	21	13.55	0.00099405	1.99598	7	26	26	7	0	26	11.75	0.00049821	5.09036	17	41	41	17	0	41	29.22	0.00253517	664	74140	7	o	17	0.055	Q	30	1		[1..130][1..33][30..386][<32..148][34..383][34..70][71..80][81..218][170..>263][219..242][243..383][302..>363][384..664][417..422][433..548]	[Interaction with MLIP][Head][Filament][DegS][Rod][Coil 1A][Linker 1][Coil 1B][OmpH][Linker 2][Coil 2][OmpH][Tail][Nuclear localization signal. {ECO:0000255}][LTD]	[propagated from UniProtKB/Swiss-Prot (P02545.1)][propagated from UniProtKB/Swiss-Prot (P02545.1)][Intermediate filament protein; pfam00038][Sensor protein DegS; pfam05384][propagated from UniProtKB/Swiss-Prot (P02545.1)][propagated from UniProtKB/Swiss-Prot (P02545.1)][propagated from UniProtKB/Swiss-Prot (P02545.1)][propagated from UniProtKB/Swiss-Prot (P02545.1)][Outer membrane protein (OmpH-l…	[1][3][10][12][18][19][19][19][19][22][22][22][24][32][32][94][108][123][135][155][171][171][201][212][230][230][260][266][270][277][277][282][301][307][311][325][330][390][390][390][392][392][392][392][394][395][395][403][403][404][404][406][407][407][409][414][414][416][423][424][426][431][450][457][458][463][496][505][510][525][546][612][612][613][616][618][619][628][628][632][632][636][636][6…	[acetylation][phosphorylation][phosphorylation][phosphorylation][phosphorylation][phosphorylation][phosphorylation][phosphorylation][phosphorylation][phosphorylation][phosphorylation][phosphorylation][phosphorylation][acetylation][modified][phosphorylation][acetylation][acetylation][acetylation][acetylation][acetylation][modified][acetylation][phosphorylation][modified][modified][acetylation][oth…	[N-acetylmethionine. {ECO:0000269|PubMed:20068231}; propagated from UniProtKB/Swiss-Prot (P02545.1)][Phosphothreonine. {ECO:0000269|PubMed:20068231}; propagated from UniProtKB/Swiss-Prot (P02545.1)][][Phosphoserine. {ECO:0000269|PubMed:18669648, ECO:0000269|PubMed:20068231, ECO:0000269|PubMed:24275569}; propagated from UniProtKB/Swiss-Prot (P02545.1)][Phosphoserine. {ECO:0000269|PubMed:18669648};…
57	1	gi|190358517|ref|NP_004209.2|	gi|190358517|ref|NP_004209.2|	ras-related protein Rab-11B [Homo sapiens]	RAB11B	7	49	49	7	0	49	40.37	0.00706476	1.98455	6	61	61	6	0	61	33.94	0.00356024	3.43876	7	65	65	7	0	65	36.7	0.0122419	218	24488	5.9	o	28	0.065	Q	24	19		[5..217][9..173][40..48]	[PLN03110][Rab11_like][Effector region (By similarity)]	[Rab GTPase; Provisional][Rab GTPase family 11 (Rab11)-like includes Rab11a, Rab11b, and Rab25; cd01868][propagated from UniProtKB/Swiss-Prot (Q15907.4)]	[2][9..13][18..25][order(20..26,37,40,43,69,124..125,127,154..156)][order(26..37,39..42)][order(36,41..49)][order(41,45..52,59,61)][43][order(44,46..48,63,65,72..73,76,80,82..85,172)][order(44..45,47,65..66,73,75,77..79)][44..48][61..65][66..69][order(69,71..81)][72..77][80..84][89..94][117..121][124..127][154..156][170..173]	[acetylation][other][other][other][other][other][other][other][other][other][other][other][other][other][other][other][other][other][other][other][other]	[N-acetylglycine; propagated from UniProtKB/Swiss-Prot (Q15907.4)][Rab subfamily motif 1 (RabSF1)][G1 box][GTP/Mg2+ binding site [chemical binding]][Rab subfamily motif 2 (RabSF2)][Switch I region][putative GEF interaction site [polypeptide binding]][G2 box][putative effector interaction site][putative GDI interaction site [polypeptide binding]][Rab family motif 1 (RabF1)][Rab family motif 2 (Rab…
58	1	gi|223555917|ref|NP_848927.2|	gi|223555917|ref|NP_848927.2|	protein LYRIC [Homo sapiens]	MTDH	1	4	4	1	0	4	2.75	0.00021602	1.98165	2	5	5	2	0	5	7.39	0.00010931	4.53211	3	7	7	3	0	7	9.79	0.00049382	582	63837	9.3						8		[1..71][72..169][101..205][381..443]	[Activation of NF-kappa-B][Interaction with BCCIP][Interaction with RELA][Lung-homing for mammary tumors (By similarity)]	[propagated from UniProtKB/Swiss-Prot (Q86UE4.2)][propagated from UniProtKB/Swiss-Prot (Q86UE4.2)][propagated from UniProtKB/Swiss-Prot (Q86UE4.2)][propagated from UniProtKB/Swiss-Prot (Q86UE4.2)]	[49..69][143][298][306][308][311][344][369][415][426][458][568]	[transmembrane region][phosphorylation][phosphorylation][phosphorylation][phosphorylation][phosphorylation][phosphorylation][phosphorylation][phosphorylation][phosphorylation][phosphorylation][phosphorylation]	[propagated from UniProtKB/Swiss-Prot (Q86UE4.2)][Phosphothreonine; propagated from UniProtKB/Swiss-Prot (Q86UE4.2)][Phosphoserine; propagated from UniProtKB/Swiss-Prot (Q86UE4.2)][Phosphoserine; propagated from UniProtKB/Swiss-Prot (Q86UE4.2)][Phosphoserine; propagated from UniProtKB/Swiss-Prot (Q86UE4.2)][Phosphoserine; propagated from UniProtKB/Swiss-Prot (Q86UE4.2)][Phosphoserine; propagated …
59	1	gi|98986464|ref|NP_006818.3|	gi|98986464|ref|NP_006818.3|	transmembrane emp24 domain-containing protein 10 precursor [Homo sapiens]	TMED10	3	19	19	3	0	19	12.79	0.00272689	1.8781	3	25	25	3	0	25	12.79	0.00145245	0.774793	2	6	6	2	0	6	12.33	0.00112486	219	24976	7.5	o15-37i186-208o	32	0.865	S	32	14		[1..142][31..213][147..178][204..219][207..219][211..219][211..212]	[Required for interaction with STX17][EMP24_GP25L][Required for TMED10 and TMED2 cis-Golgi network localization][Interaction with COPG1][Interaction with ARF1][COPI vesicle coat-binding][COPII vesicle coat-binding]	[propagated from UniProtKB/Swiss-Prot (P49755.2)][emp24/gp25L/p24 family/GOLD; pfam01105][propagated from UniProtKB/Swiss-Prot (P49755.2)][propagated from UniProtKB/Swiss-Prot (P49755.2)][propagated from UniProtKB/Swiss-Prot (P49755.2)][propagated from UniProtKB/Swiss-Prot (P49755.2)][propagated from UniProtKB/Swiss-Prot (P49755.2)]	[171][176][186..206]	[methylation][methylation][transmembrane region]	[Dimethylated arginine, alternate. {ECO:0000250|UniProtKB:Q63584}; Omega-N-methylated arginine, alternate. {ECO:0000250}; propagated from UniProtKB/Swiss-Prot (P49755.2)][Dimethylated arginine, alternate. {ECO:0000250|UniProtKB:Q63584}; Omega-N-methylated arginine, alternate. {ECO:0000250}; propagated from UniProtKB/Swiss-Prot (P49755.2)][propagated from UniProtKB/Swiss-Prot (P49755.2)]
60	1	gi|305855090|ref|NP_001182257.1|	gi|305855090|ref|NP_001182257.1|	ras-related protein Rab-9A [Homo sapiens]	RAB9A	2	3	3	2	0	3	17.41	0.00046912	1.85375	1	4	4	1	0	4	6.47	0.0002532	4.84585	3	6	6	3	0	6	17.41	0.00122559	201	22838	5.5	o	24	0.255	Q	20	X		[3..172][9..173][36..44]	[Rab9][Ras][Effector region (By similarity)]	[Rab GTPase family 9 (Rab9); cd04116][Ras family; pfam00071][propagated from UniProtKB/Swiss-Prot (P51151.1)]	[2][4..9][14..21][order(17..22,32..34,38..39,65,124..125,127,154..156)][order(22..33,35..38)][order(32,37..45)][order(37,41..48,55,57)][39][order(40,42..44,59,61,68..69,72,76,78..81,172)][order(40..41,43,61..62,69,71,73..75)][40..44][57..61][62..65][order(65,67..77)][68..73][76..80][85..90][order(108..112,115..121)][124..127][154..156][170..172][179]	[acetylation][other][other][other][other][other][other][other][other][other][other][other][other][other][other][other][other][other][other][other][other][phosphorylation]	[N-acetylalanine; propagated from UniProtKB/Swiss-Prot (P51151.1)][Rab subfamily motif 1 (RabSF1)][G1 box][GTP/Mg2+ binding site [chemical binding]][Rab subfamily motif 2 (RabSF2)][Switch I region][putative GEF interaction site [polypeptide binding]][G2 box][putative effector interaction site][putative GDI interaction site [polypeptide binding]][Rab family motif 1 (RabF1)][Rab family motif 2 (Rab…
61	1	gi|4557251|ref|NP_001101.1|	gi|4557251|ref|NP_001101.1|	disintegrin and metalloproteinase domain-containing protein 10 precursor [Homo sapiens]	ADAM10	3	6	6	3	0	6	6.55	0.00025212	1.85294	3	8	8	3	0	8	6.82	0.00013608	2.41912	2	6	6	2	0	6	5.21	0.00032934	748	84142	7.8	o674-696i	19	0.898	S	19	15	3.4.24.81	[43..156][171..178][220..459][224..451][466..549][708..715][722..728]	[Pep_M12B_propep][Cysteine switch. {ECO:0000250}][ZnMc_TACE_like][Reprolysin][Disintegrin][SH3-binding. {ECO:0000255}][SH3-binding. {ECO:0000255}]	[Reprolysin family propeptide; pfam01562][propagated from UniProtKB/Swiss-Prot (O14672.1)][Zinc-dependent metalloprotease; TACE_like subfamily. TACE, the tumor-necrosis factor-alpha converting enzyme, releases soluble TNF-alpha from transmembrane pro-TNF-alpha; cd04270][Reprolysin (M12B) family zinc metalloprotease; pfam01421][Disintegrin; pfam00200][propagated from UniProtKB/Swiss-Prot (O14672.1…	[order(383..384,387,393)][673..693][719]	[active][transmembrane region][phosphorylation]	[][propagated from UniProtKB/Swiss-Prot (O14672.1)][Phosphothreonine, by FAM20C. {ECO:0000244|PubMed:24275569, ECO:0000269|PubMed:26091039}; propagated from UniProtKB/Swiss-Prot (O14672.1)]
62	1	gi|55741641|ref|NP_065789.1|	gi|55741641|ref|NP_065789.1|	kinase D-interacting substrate of 220 kDa [Homo sapiens]	KIDINS220	1	3	3	1	0	3	1.19	5.324e-05	1.82759	3	4	4	3	0	4	2.71	2.874e-05	23.1724	12	29	29	12	0	29	9.82	0.00067231	1771	196541	6.6	o495-517i524-546o658-680i687-706o	16	0.058	Q	24	2		[4..33][13..58][32..190][37..66][42..133][70..99][103..132][108..199][136..165][164..289][169..198][174..266][202..231][230..355][235..264][268..297][273..365][301..330][334..363][354..410][367..396][440..953][1089..1092][1767..1771]	[ANK 1][Ank_4][ANK][ANK 2][Ank_2][ANK 3][ANK 4][Ank_2][ANK 5][ANK][ANK 6][Ank_2][ANK 7][ANK][ANK 8][ANK 9][Ank_2][ANK 10][ANK 11][Ank_5][ANK 12][KAP_NTPase][Mediates interaction with CRKL. {ECO:0000250}][Mediates interaction with SNTA1. {ECO:0000250}]	[propagated from UniProtKB/Swiss-Prot (Q9ULH0.3)][Ankyrin repeats (many copies); pfam13637][ankyrin repeats; ankyrin repeats mediate protein-protein interactions in very diverse families of proteins. The number of ANK repeats in a protein can range from 2 to over 20 (ankyrins, for example). ANK repeats may occur in combinations with other...; cd00204][propagated from UniProtKB/Swiss-Prot (Q9ULH0.…	[500..520][525..545][660..680][686..706][918][918][1365][1521][1526][1555][1633]	[transmembrane region][transmembrane region][transmembrane region][transmembrane region][phosphorylation][phosphorylation][phosphorylation][phosphorylation][phosphorylation][phosphorylation][phosphorylation]	[propagated from UniProtKB/Swiss-Prot (Q9ULH0.3)][propagated from UniProtKB/Swiss-Prot (Q9ULH0.3)][propagated from UniProtKB/Swiss-Prot (Q9ULH0.3)][propagated from UniProtKB/Swiss-Prot (Q9ULH0.3)][][Phosphoserine. {ECO:0000244|PubMed:18669648, ECO:0000244|PubMed:24275569}; propagated from UniProtKB/Swiss-Prot (Q9ULH0.3)][Phosphoserine. {ECO:0000244|PubMed:18669648}; propagated from UniProtKB/Swis…
63	1	gi|111118978|ref|NP_059145.2|	gi|111118978|ref|NP_059145.2|	ephrin type-B receptor 2 isoform 1 precursor [Homo sapiens]	EPHB2	6	15	12	4	3	13.2562	8.72	0.00042257	1.82328	7	18	18	7	0	18	11.16	0.00023227	2.26293	5	14	12	4	2	12.6	6.9	0.00052467	986	109874	5.6	o543-565i	19	0.758	S	19	1	2.7.10.1	[19..196][252..378][325..431][436..527][543..617][616..884][621..880][910..980][910..977]	[EphR_LBD_B2][TNFRSF][FN3][FN3][EphA2_TM][PTKc_EphR_B][Pkinase_Tyr][SAM_EPH-B2][SAM]	[Ligand Binding Domain of Ephrin type-B Receptor 2; cd10477][Tumor necrosis factor receptor superfamily (TNFRSF); cl22855][Fibronectin type 3 domain; One of three types of internal repeats found in the plasma protein fibronectin. Its tenth fibronectin type III repeat contains an RGD cell recognition sequence in a flexible loop between 2 strands. Approximately 2% of all...; cd00063][Fibronectin ty…	[order(28..30,32,44..47,49,53,55,57,60,93..95,99,101,147,][order(325,400,415)][order(416,418,420..421)][order(436,500,515)][order(516..517,519..520)][544..564][577][584][596][596][602][602][order(627..631,635,651,653,699..700,702,706,746,750..751,][order(627..629,631,635,651,653,699..700,702,706,751,753,][659][736][742][order(746,750,785..789,798,832)][763..791][775][776][780][780][800][order(912…	[other][other][other][other][other][transmembrane region][phosphorylation][phosphorylation][phosphorylation][phosphorylation][phosphorylation][phosphorylation][active][other][phosphorylation][phosphorylation][phosphorylation][other][other][phosphorylation][phosphorylation][phosphorylation][phosphorylation][phosphorylation][other][other][other][phosphorylation][other]	[ephrin binding site [polypeptide binding]][Interdomain contacts][Cytokine receptor motif][Interdomain contacts][Cytokine receptor motif][propagated from UniProtKB/Swiss-Prot (P29323.5)][][][][Phosphotyrosine. {ECO:0000250|UniProtKB:P29320}; propagated from UniProtKB/Swiss-Prot (P29323.5)][][Phosphotyrosine. {ECO:0000250|UniProtKB:P29320}; propagated from UniProtKB/Swiss-Prot (P29323.5)][][ATP bi…
64	1	gi|47419930|ref|NP_001888.2|	gi|47419930|ref|NP_001888.2|	chondroitin sulfate proteoglycan 4 precursor [Homo sapiens]	CSPG4	2	5	5	2	0	5	1.38	6.768e-05	1.78947	2	7	7	2	0	7	1.38	3.836e-05	2.31579	3	5	5	3	0	5	2.07	8.841e-05	2322	250534	5.5	o2224-2246i	30	0.841	S	30	15		[29..176][30..639][30..639][203..361][556..643][574..1040][631..1446][1360..1449][1476..1561][1583..1679][1586..2221][1587..2221][2320..2322]	[LamG][Globular or compact configuration stabilized by disulfide bonds][Neurite growth inhibition (By similarity)][LamG][CSPG 2][Interaction with COL6A2 (By similarity)][Interaction with COL5A1 (By similarity)][CSPG 9][CSPG 10][CSPG 11][Neurite growth inhibition (By similarity)][Cysteine-containing][PDZ-binding]	[Laminin G domain; Laminin G-like domains are usually Ca++ mediated receptors that can have binding sites for steroids, beta1 integrins, heparin, sulfatides, fibulin-1, and alpha-dystroglycans. Proteins that contain LamG domains serve a variety of...; cd00110][propagated from UniProtKB/Swiss-Prot (Q6UVK1.2)][propagated from UniProtKB/Swiss-Prot (Q6UVK1.2)][Laminin G domain; Laminin G-like domains…	[2225..2245]	[transmembrane region]	[propagated from UniProtKB/Swiss-Prot (Q6UVK1.2)]
65	1	gi|162417971|ref|NP_055567.2|	gi|162417971|ref|NP_055567.2|	signal peptidase complex subunit 2 [Homo sapiens]	SPCS2	3	10	10	3	0	10	16.81	0.00139075	1.76523	3	14	14	3	0	14	16.81	0.00078818	2.07487	2	9	9	2	0	9	16.37	0.00163503	226	25003	8.5						11	3.4.-.-	[55..219]	[SPC25]	[Microsomal signal peptidase 25 kDa subunit (SPC25); pfam06703]	[2][87..107][112..132][169][191]	[acetylation][transmembrane region][transmembrane region][acetylation][acetylation]	[N-acetylalanine. {ECO:0000269|PubMed:19413330, ECO:0000269|PubMed:22814378, ECO:0000269|Ref.4}; propagated from UniProtKB/Swiss-Prot (Q15005.3)][propagated from UniProtKB/Swiss-Prot (Q15005.3)][propagated from UniProtKB/Swiss-Prot (Q15005.3)][N6-acetyllysine. {ECO:0000269|PubMed:19608861}; propagated from UniProtKB/Swiss-Prot (Q15005.3)][N6-acetyllysine. {ECO:0000269|PubMed:19608861}; propagated…
66	3	gi|223468595|ref|NP_001138471.1|;gi|223468597|ref|NP_001138472.1|;gi|4504763|ref|NP_002201.1|	gi|223468595|ref|NP_001138471.1|	integrin alpha-V isoform 2 precursor [Homo sapiens]	ITGAV	4	10	10	4	0	10	6.09	0.00031368	1.76404	6	14	14	6	0	14	8.08	0.00017777	4.3764	7	19	19	7	0	19	9.68	0.00077853	1002	111145	5.6						2		[175..224][202..>242][256..309][321..375][388..430][421..868]	[VCBS][Int_alpha][Int_alpha][Int_alpha][Int_alpha][Integrin_alpha2]	[Repeat domain in Vibrio, Colwellia, Bradyrhizobium and Shewanella; pfam13517][Integrin alpha (beta-propellor repeats); smart00191][Integrin alpha (beta-propellor repeats); smart00191][Integrin alpha (beta-propellor repeats); smart00191][Integrin alpha (beta-propellor repeats); smart00191][Integrin alpha; pfam08441]
67	1	gi|13559514|ref|NP_060895.1|	gi|13559514|ref|NP_060895.1|	phosphatidylinositol 4-kinase type 2-alpha [Homo sapiens]	PI4K2A	3	5	5	3	0	5	6.68	0.00032809	1.76344	3	7	7	3	0	7	7.52	0.00018594	2.30645	2	5	5	2	0	5	4.8	0.00042857	479	54022	8.3	o	42	0.022	Q	42	10	2.7.1.67	[172..416]	[PI3_PI4_kinase]	[Phosphatidylinositol 3- and 4-kinase; pfam00454]	[1][5][5][9][9][44][47][47][51][51][462][462][464]	[acetylation][phosphorylation][phosphorylation][phosphorylation][phosphorylation][phosphorylation][phosphorylation][phosphorylation][phosphorylation][phosphorylation][phosphorylation][phosphorylation][phosphorylation]	[N-acetylmethionine. {ECO:0000269|PubMed:20068231, ECO:0000269|PubMed:22814378}; propagated from UniProtKB/Swiss-Prot (Q9BTU6.1)][][Phosphoserine. {ECO:0000269|PubMed:20068231}; propagated from UniProtKB/Swiss-Prot (Q9BTU6.1)][][Phosphoserine. {ECO:0000269|PubMed:20068231}; propagated from UniProtKB/Swiss-Prot (Q9BTU6.1)][][][Phosphoserine. {ECO:0000269|PubMed:17081983, ECO:0000269|PubMed:1936919…
68	2	gi|4506649|ref|NP_000958.1|;gi|76496472|ref|NP_001029025.1|	gi|4506649|ref|NP_000958.1|	60S ribosomal protein L3 isoform a [Homo sapiens]	RPL3	4	17	17	4	0	17	14.39	0.00132587	1.74934	8	24	24	8	0	24	21.34	0.00075772	0.671504	3	5	5	3	0	5	7.94	0.0005094	403	46109	10.2	o	16	0.169	Q	55	22		[1..400][3..375]	[PTZ00103][Ribosomal_L3]	[60S ribosomal protein L3; Provisional][Ribosomal protein L3; cl00324]	[13][136][286][294][304][307][366][373]	[phosphorylation][acetylation][acetylation][acetylation][phosphorylation][phosphorylation][acetylation][acetylation]	[Phosphoserine. {ECO:0000269|PubMed:19369195, ECO:0000269|PubMed:20068231}; propagated from UniProtKB/Swiss-Prot (P39023.2)][N6-acetyllysine. {ECO:0000250|UniProtKB:P27659}; propagated from UniProtKB/Swiss-Prot (P39023.2)][N6-acetyllysine. {ECO:0000250|UniProtKB:P27659}; propagated from UniProtKB/Swiss-Prot (P39023.2)][N6-acetyllysine. {ECO:0000269|PubMed:19608861}; propagated from UniProtKB/Swis…
69	1	gi|4758988|ref|NP_004152.1|	gi|4758988|ref|NP_004152.1|	ras-related protein Rab-1A isoform 1 [Homo sapiens]	RAB1A	7	48	11	4	37	34.9412	44.39	0.00535724	1.73198	8	74	28	5	46	49.8305	50.24	0.00309276	11.8982	9	341	38	5	303	183.747	49.76	0.0368008	205	22678	6.2	o	38	0.14	Q	24	2		[10..175][13..174][40..48]	[Rab1_Ypt1][Ras][Effector region (By similarity)]	[Rab GTPase family 1 includes the yeast homolog Ypt1; cd01869][Ras family; pfam00071][propagated from UniProtKB/Swiss-Prot (P62820.3)]	[2][10..13][18..25][order(19,21..26,36,124..125,127,154..156)][order(26..37,40..42)][order(36,41..49)][order(41,45..52,59,61)][43][order(44,46..48,63,65,72..73,76,80,82..85,172)][order(44..45,47,65..66,73,75,77..79,82)][44..48][61..65][66..69][order(69,71..81)][72..77][79][80..84][89..94][115..121][124..127][154..156][170..175][204][205]	[acetylation][other][other][other][other][other][other][other][other][other][other][other][other][other][other][phosphorylation][other][other][other][other][other][other][modified][modified]	[N-acetylserine; propagated from UniProtKB/Swiss-Prot (P62820.3)][Rab subfamily motif 1 (RabSF1)][G1 box][GTP/Mg2+ binding site [chemical binding]][Rab subfamily motif 2 (RabSF2)][Switch I region][putative GEF interaction site [polypeptide binding]][G2 box][putative effector interaction site][GDI interaction site][Rab family motif 1 (RabF1)][Rab family motif 2 (RabF2)][G3 box][Switch II region][R…
70	1	gi|5803023|ref|NP_006807.1|	gi|5803023|ref|NP_006807.1|	vesicular integral-membrane protein VIP36 precursor [Homo sapiens]	LMAN2	3	7	7	3	0	7	12.08	0.00061802	1.73109	3	10	10	3	0	10	11.8	0.0003574	7.10644	3	22	22	3	0	22	12.36	0.00253725	356	40229	7	o323-345i	45	0.536	S	45	5		[53..301][164..166][260..262]	[lectin_VIP36_VIPL][Carbohydrate binding. {ECO:0000255|PROSITE-ProRule:PRU00658}][Carbohydrate binding. {ECO:0000255|PROSITE-ProRule:PRU00658}]	[VIP36 and VIPL type 1 transmembrane proteins, lectin domain; cd06901][propagated from UniProtKB/Swiss-Prot (Q12907.1)][propagated from UniProtKB/Swiss-Prot (Q12907.1)]	[order(131,164,166,190,260..262)][order(162,166,190,193)][323..345]	[other][metal-binding][transmembrane region]	[carbohydrate binding site [chemical binding]][metal binding site [ion binding]][propagated from UniProtKB/Swiss-Prot (Q12907.1)]
71	1	gi|10880989|ref|NP_067075.1|	gi|10880989|ref|NP_067075.1|	ras-related protein Rab-18 isoform 1 [Homo sapiens]	RAB18	8	23	23	8	0	23	48.06	0.00350928	1.72179	7	33	33	7	0	33	42.72	0.00203822	22.1021	8	226	226	8	0	226	48.06	0.0450436	206	22977	5.2	o	23	0.127	Q	21	10		[9..169][10..171][37..45]	[Rab18][Ras][Effector region (By similarity)]	[Rab GTPase family 18 (Rab18); cd01863][Ras family; pfam00071][propagated from UniProtKB/Swiss-Prot (Q9NP72.1)]	[1][9..10][15..22][order(17..23,33..34,40,66,122..123,125..126,151..153)][order(23..34,38..39)][order(33,38..46)][order(38,42..49,56,58)][40][order(41,43..45,60,62,69..70,73,77,79..82,169)][order(41..42,44,62..63,70,72,74..76)][41..45][58..62][63..66][order(66,68..78)][69..74][77..81][86..91][114..119][122..125][151..153][167..169]	[acetylation][other][other][other][other][other][other][other][other][other][other][other][other][other][other][other][other][other][other][other][other]	[N-acetylmethionine; propagated from UniProtKB/Swiss-Prot (Q9NP72.1)][Rab subfamily motif 1 (RabSF1)][G1 box][GTP/Mg2+ binding site [chemical binding]][Rab subfamily motif 2 (RabSF2)][Switch I region][putative GEF interaction site [polypeptide binding]][G2 box][putative effector interaction site][putative GDI interaction site [polypeptide binding]][Rab family motif 1 (RabF1)][Rab family motif 2 (…
72	1	gi|29788785|ref|NP_821133.1|	gi|29788785|ref|NP_821133.1|	tubulin beta chain [Homo sapiens]	TUBB	14	89	40	4	49	83.2524	46.4	0.00589347	1.7017	15	135	45	4	90	120.829	55.18	0.00346254	0.160266	4	6	2	2	4	6	13.06	0.00055483	444	49671	4.9	o	19	0.052	Q	19	6		[1..429][2..426]	[PLN00220][beta_tubulin]	[tubulin beta chain; Provisional][The beta-tubulin family; cd02187]	[order(2,131,245..247,251,256,258..260,322..324,327,][order(10..12,15,138,140..144,181,204,222,226)][order(22..23,26..27,215,224,227..228,234,270,272..274,][36][40][55][58][58][order(70..71,98..100,103,179,181,222)][172][275][318]	[other][other][other][phosphorylation][phosphorylation][phosphorylation][acetylation][modified][other][phosphorylation][phosphorylation][methylation]	[beta/alpha domain interface [polypeptide binding]][nucleotide binding site [chemical binding]][Taxol binding site [chemical binding]][][Phosphoserine. {ECO:0000250|UniProtKB:P99024}; propagated from UniProtKB/Swiss-Prot (P07437.2)][Phosphothreonine. {ECO:0000250|UniProtKB:P69897}; propagated from UniProtKB/Swiss-Prot (P07437.2)][N6-acetyllysine, alternate. {ECO:0000244|PubMed:19608861}; propagat…
73	1	gi|170932494|ref|NP_003560.2|	gi|170932494|ref|NP_003560.2|	syntaxin-7 [Homo sapiens]	STX7	1	2	2	1	0	2	5.75	0.00024085	1.65068	1	3	3	1	0	3	5.75	0.00014625	12.9315	4	12	12	4	0	12	20.31	0.0018877	261	29816	5.6						6		[9..148][168..227]	[SynN][SNARE_syntaxin7]	[Syntaxin N-terminus domain; syntaxins are nervous system-specific proteins implicated in the docking of synaptic vesicles with the presynaptic plasma membrane; they are a family of receptors for intracellular transport vesicles; each target membrane may...; cd00179][SNARE motif of syntaxin 7; cd15875]	[2][order(12,19,84..85,88..89,92,95..96,102,105,136)][order(39,49,52..53,60,64,67,74,90,95,98,104,111..112,][order(128..138,145..148)][129][order(171..172,174..176,178..179,181..183,185..186,][199][239..259]	[acetylation][other][other][other][phosphorylation][other][other][transmembrane region]	[N-acetylserine; propagated from UniProtKB/Swiss-Prot (O15400.4)][nSec1 interaction sites][interdomain interaction site][linker region][Phosphoserine; propagated from UniProtKB/Swiss-Prot (O15400.4)][heterotetramer interface [polypeptide binding]][zero layer][propagated from UniProtKB/Swiss-Prot (O15400.4)]
74	1	gi|8923857|ref|NP_060917.1|	gi|8923857|ref|NP_060917.1|	ER membrane protein complex subunit 3 [Homo sapiens]	EMC3	3	4	4	3	0	4	13.03	0.0004817	1.65068	3	6	6	3	0	6	18.77	0.00029249	6.46575	5	12	12	5	0	12	24.14	0.0018877	261	29952	6.8	o15-37i115-137o	33	0.425	A	29	3		[5..191]	[DUF106]	[Integral membrane protein DUF106; pfam01956]	[14..34][118..138]	[transmembrane region][transmembrane region]	[propagated from UniProtKB/Swiss-Prot (Q9P0I2.3)][propagated from UniProtKB/Swiss-Prot (Q9P0I2.3)]
75	1	gi|7019415|ref|NP_037468.1|	gi|7019415|ref|NP_037468.1|	protein transport protein Sec61 subunit alpha isoform 1 [Homo sapiens]	SEC61A1	2	2	2	2	0	2	7.14	0.00013206	1.65	2	3	3	2	0	3	6.93	8.019e-05	9.4875	4	10	4	2	6	8.8	6.93	0.00075904	476	52265	8.1	i33-55o75-97i118-138o143-165i172-193o203-220i241-263o283-305i413-435o440-462i	47	0.281	A	47	3		[1..471][40..74][75..459]	[PTZ00219][Plug_translocon][SecY]	[Sec61 alpha subunit; Provisional][Plug domain of Sec61p; pfam10559][SecY translocase; pfam00344]	[34..53][77..96][118..138][145..165][173..193][241..261][289..309][355..375][421..441][446..462]	[transmembrane region][transmembrane region][transmembrane region][transmembrane region][transmembrane region][transmembrane region][transmembrane region][transmembrane region][transmembrane region][transmembrane region]	[propagated from UniProtKB/Swiss-Prot (P61619.2)][propagated from UniProtKB/Swiss-Prot (P61619.2)][propagated from UniProtKB/Swiss-Prot (P61619.2)][propagated from UniProtKB/Swiss-Prot (P61619.2)][propagated from UniProtKB/Swiss-Prot (P61619.2)][propagated from UniProtKB/Swiss-Prot (P61619.2)][propagated from UniProtKB/Swiss-Prot (P61619.2)][propagated from UniProtKB/Swiss-Prot (P61619.2)][propag…
76	1	gi|5730031|ref|NP_005688.2|	gi|5730031|ref|NP_005688.2|	secretory carrier-associated membrane protein 2 [Homo sapiens]	SCAMP2	1	4	4	1	0	4	6.08	0.00038214	1.64655	1	6	6	1	0	6	6.08	0.00023204	5.37931	1	10	10	1	0	10	6.08	0.00124795	329	36649	6.1	i152-174o184-203i216-238o261-283i	36	0.045	Q	0	15		[116..294][203..218]	[SCAMP][Interaction with SLC9A7]	[SCAMP family; pfam04144][propagated from UniProtKB/Swiss-Prot (O15127.2)]	[154..174][182..202][219..239][263..283][319][320]	[transmembrane region][transmembrane region][transmembrane region][transmembrane region][phosphorylation][phosphorylation]	[propagated from UniProtKB/Swiss-Prot (O15127.2)][propagated from UniProtKB/Swiss-Prot (O15127.2)][propagated from UniProtKB/Swiss-Prot (O15127.2)][propagated from UniProtKB/Swiss-Prot (O15127.2)][Phosphoserine. {ECO:0000244|PubMed:20068231, ECO:0000244|PubMed:24275569}; propagated from UniProtKB/Swiss-Prot (O15127.2)][Phosphoserine. {ECO:0000244|PubMed:21406692, ECO:0000244|PubMed:24275569}; pro…
77	1	gi|214831730|ref|NP_037534.3|	gi|214831730|ref|NP_037534.3|	fatty acid desaturase 1 [Homo sapiens]	FADS1	1	2	2	1	0	2	4.19	0.00012547	1.64474	2	3	3	2	0	3	6.79	7.619e-05	6.47368	1	6	6	1	0	6	2.59	0.00049171	501	57886	9.5						11	1.14.19.-	[74..496][75..163][77..150][109..112][218..469][236..240][273..277][439..443]	[PLN03199][N-terminal cytochrome b5-like domain][Cyt-b5][N-terminal cytochrome b5-like motif][Delta6-FADS-like][C-terminal multiple membrane-spanning desaturase motif][C-terminal multiple membrane-spanning desaturase motif][C-terminal multiple membrane-spanning desaturase motif]	[delta6-acyl-lipid desaturase-like protein; Provisional][][Cytochrome b5-like Heme/Steroid binding domain; pfam00173][][The Delta6 Fatty Acid Desaturase (Delta6-FADS)-like CD includes the integral-membrane enzymes: delta-4, delta-5, delta-6, delta-8, delta-8-sphingolipid, and delta-11 desaturases found in vertebrates, higher plants, fungi, and bacteria. These desaturases...; cd03506][][][]	[order(236,240,273,276..277,439,442..443)]	[other]	[putative di-iron ligands [ion binding]]
78	1	gi|7661948|ref|NP_055545.1|	gi|7661948|ref|NP_055545.1|	malectin precursor [Homo sapiens]	MLEC	1	2	2	1	0	2	5.48	0.00021528	1.64122	2	3	3	2	0	3	9.59	0.00013072	10.7328	2	10	10	2	0	10	9.93	0.00140608	292	32234	5.4	o271-290i	29	0.749	S	29	12		[48..208]	[Malectin]	[Di-glucose binding within endoplasmic reticulum; pfam11721]	[270..290]	[transmembrane region]	[propagated from UniProtKB/Swiss-Prot (Q14165.1)]
79	1	gi|94538362|ref|NP_004466.2|	gi|94538362|ref|NP_004466.2|	flotillin-2 [Homo sapiens]	FLOT2	8	17	17	8	0	17	24.3	0.00124843	1.61449	8	26	26	8	0	26	25.7	0.00077292	1.73739	6	14	14	6	0	14	17.99	0.001343	428	47064	5.3	o	43	0.099	Q	22	17		[34..178][<288..350]	[SPFH_flotillin][SPFH_like]	[Flotillin or reggie family; SPFH (stomatin, prohibitin, flotillin, and HflK/C) superfamily; cd03399][core domain of the SPFH (stomatin, prohibitin, flotillin, and HflK/C) superfamily; cl19107]	[405]	[phosphorylation]	[Phosphoserine. {ECO:0000269|PubMed:24275569}; propagated from UniProtKB/Swiss-Prot (Q14254.2)]
80	1	gi|15617199|ref|NP_254280.1|	gi|15617199|ref|NP_254280.1|	histone H2A type 3 [Homo sapiens]	HIST3H2A	2	18	18	2	0	18	25.38	0.00435198	1.59239	2	29	22	1	7	27.9231	21.54	0.00273291	0.742774	2	7	5	1	2	6.42857	21.54	0.00203031	130	14121	11.1	o	42	0.036	A	62	1		[1..130][6..120]	[PTZ00017][H2A]	[histone H2A; Provisional][Histone 2A; H2A is a subunit of the nucleosome. The nucleosome is an octamer containing two H2A, H2B, H3, and H4 subunits. The H2A subunit performs essential roles in maintaining structural integrity of the nucleosome, chromatin condensation, and binding...; cd00074]	[2][2][2][4][4][order(6,10)][6][order(30,33,36..37,43,75,78)][37][39..42][order(52,55..56,59..60,63..64)][105][119][120][120][121][123][126]	[phosphorylation][acetylation][phosphorylation][modified][methylation][acetylation][acetylation][DNA binding][modified][other][other][methylation][modified][modified][other][phosphorylation][phosphorylation][modified]	[][N-acetylserine. {ECO:0000269|PubMed:15823041}; propagated from UniProtKB/Swiss-Prot (Q7L7L0.3)][Phosphoserine, by RPS6KA5. {ECO:0000269|PubMed:15010469}; propagated from UniProtKB/Swiss-Prot (Q7L7L0.3)][Citrulline, alternate. {ECO:0000269|PubMed:15823041}; propagated from UniProtKB/Swiss-Prot (Q7L7L0.3)][Symmetric dimethylarginine, by PRMT5, alternate. {ECO:0000250|UniProtKB:P22752}; propagate…
81	2	gi|209862831|ref|NP_001129487.1|;gi|50845388|ref|NP_001002858.1|	gi|209862831|ref|NP_001129487.1|	annexin A2 isoform 2 [Homo sapiens]	ANXA2	20	501	501	20	0	501	59.88	0.0464511	1.58061	20	783	783	20	0	783	62.24	0.0293878	0.11127	9	27	27	9	0	27	29.79	0.00327006	339	38604	7.8	o	16	0.067	Q	19	15		[2..24][37..102][42..102][109..174][114..174][193..259][199..259][269..334][274..334]	[S100A10-binding site (Potential)][Annexin][Annexin 1][Annexin][Annexin 2][Annexin][Annexin 3][Annexin][Annexin 4]	[propagated from UniProtKB/Swiss-Prot (P07355.2)][Annexin; pfam00191][propagated from UniProtKB/Swiss-Prot (P07355.2)][Annexin; pfam00191][propagated from UniProtKB/Swiss-Prot (P07355.2)][Annexin; pfam00191][propagated from UniProtKB/Swiss-Prot (P07355.2)][Annexin; pfam00191][propagated from UniProtKB/Swiss-Prot (P07355.2)]	[2][24][26]	[acetylation][phosphorylation][phosphorylation]	[N-acetylserine; propagated from UniProtKB/Swiss-Prot (P07355.2)][Phosphotyrosine, by SRC; propagated from UniProtKB/Swiss-Prot (P07355.2)][Phosphoserine, by PKC; propagated from UniProtKB/Swiss-Prot (P07355.2)]
82	1	gi|55956788|ref|NP_005372.2|	gi|55956788|ref|NP_005372.2|	nucleolin [Homo sapiens]	NCL	6	26	26	6	0	26	10	0.00115099	1.56599	8	41	41	8	0	41	12.39	0.00073474	0.865306	6	11	11	6	0	11	9.86	0.0006361	710	76615	4.7	o	13	0.018	Q	0	2		[58..135][307..381][308..378][390..465][394..459][485..557][487..555][572..649][573..642]	[8 X 8 AA tandem repeats of X-T-P-X-K-K-X-X][RRM1_NCL][RRM][RRM2_NCL][RRM][RRM3_NCL][RRM][RRM4_NCL][RRM]	[propagated from UniProtKB/Swiss-Prot (P19338.3)][RNA recognition motif 1 in vertebrate nucleolin; cd12403][RNA recognition motif; smart00360][RNA recognition motif 2 in vertebrate nucleolin; cd12404][RNA recognition motif; smart00360][RNA recognition motif 3 in vertebrate nucleolin; cd12405][RNA recognition motif; smart00360][RNA recognition motif 4 in vertebrate nucleolin; cd12406][RNA recognit…	[9][15][28][28][34][34][41][41][42][42][67][67][67][69][69][76][76][84][92][99][102][106][113][116][121][121][124][145][145][153][153][184][206][214][301][304][305][order(308,310,319..320,324,342..343,345..347,349,351,377,][318][377][order(390..391,396,398,420..423,429,431..433,462,464)][398][403][513][563][563][572][577][580][619][619][646]	[acetylation][acetylation][phosphorylation][phosphorylation][phosphorylation][phosphorylation][phosphorylation][phosphorylation][phosphorylation][phosphorylation][phosphorylation][phosphorylation][phosphorylation][phosphorylation][phosphorylation][phosphorylation][phosphorylation][phosphorylation][phosphorylation][phosphorylation][acetylation][phosphorylation][phosphorylation][acetylation][phosph…	[N6-acetyllysine; propagated from UniProtKB/Swiss-Prot (P19338.3)][N6-acetyllysine; propagated from UniProtKB/Swiss-Prot (P19338.3)][][Phosphoserine; propagated from UniProtKB/Swiss-Prot (P19338.3)][][Phosphoserine; propagated from UniProtKB/Swiss-Prot (P19338.3)][][Phosphoserine; propagated from UniProtKB/Swiss-Prot (P19338.3)][][Phosphoserine; propagated from UniProtKB/Swiss-Prot (P19338.3)][][…
83	2	gi|119395740|ref|NP_001073286.1|;gi|119395742|ref|NP_000201.2|	gi|119395740|ref|NP_001073286.1|	integrin alpha-6 isoform a precursor [Homo sapiens]	ITGA6	5	10	10	5	0	10	7.79	0.00028809	1.54011	6	16	16	6	0	16	9.26	0.0001866	1.40642	4	7	7	4	0	7	6.32	0.00026343	1091	122053	6.8	o1015-1037i	24	0.816	S	24	2		[40..100][254..306][314..367][374..425][431..>454][464..939]	[Int_alpha][Int_alpha][Int_alpha][Int_alpha][Int_alpha][Integrin_alpha2]	[Integrin alpha (beta-propellor repeats); smart00191][Integrin alpha (beta-propellor repeats); smart00191][Integrin alpha (beta-propellor repeats); smart00191][Integrin alpha (beta-propellor repeats); smart00191][Integrin alpha (beta-propellor repeats); smart00191][Integrin alpha; pfam08441]
84	1	gi|38505222|ref|NP_061895.3|	gi|38505222|ref|NP_061895.3|	protein disulfide-isomerase TMX3 precursor [Homo sapiens]	TMX3	1	3	3	1	0	3	3.08	0.00020769	1.48571	3	5	5	3	0	5	9.03	0.00014013	5.81429	2	9	9	2	0	9	5.29	0.00081391	454	51872	4.9	o374-396i	25	0.634	S	25	18	5.3.4.1	[27..130][160..337][257..340][451..454]	[PDI_a_TMX3][Thioredoxin_6][Thioredoxin_like][Di-lysine motif]	[PDIa family, TMX3 subfamily; composed of eukaryotic proteins similar to human TMX3, a TRX related transmembrane protein containing one redox active TRX domain at the N-terminus and a classical ER retrieval sequence for type I transmembrane proteins at...; cd03000][Thioredoxin-like domain; pfam13848][Protein Disulfide Oxidoreductases and Other Proteins with a Thioredoxin fold; cl00388][propagated…	[order(53,56,117)][376..396]	[active][transmembrane region]	[catalytic residues [active]][propagated from UniProtKB/Swiss-Prot (Q96JJ7.2)]
85	1	gi|189571662|ref|NP_001121681.1|	gi|189571662|ref|NP_001121681.1|	delta-sarcoglycan isoform 3 [Homo sapiens]	SGCD	3	6	6	3	0	6	9.69	0.00065255	1.48409	3	10	10	3	0	10	9.69	0.00044026	1.93636	3	6	6	3	0	6	12.11	0.0008524	289	32071	9.1	i34-56o	53	0.458	A	53	5		[21..282]	[Sarcoglycan_1]	[Sarcoglycan complex subunit protein; pfam04790]	[36..56]	[transmembrane region]	[propagated from UniProtKB/Swiss-Prot (Q92629.2)]
86	3	gi|4502897|ref|NP_001285.1|;gi|532164704|ref|NP_001269104.1|;gi|532164706|ref|NP_001269105.1|	gi|4502897|ref|NP_001285.1|	cleft lip and palate transmembrane protein 1 isoform 2 [Homo sapiens]	CLPTM1	3	8	8	3	0	8	5.68	0.00037586	1.41353	4	14	14	4	0	14	8.97	0.00026626	7.61278	4	33	33	4	0	33	10.46	0.00202525	669	76097	6.3	o355-377i390-412o417-434i478-497o507-529i	24	0.061	Q	24	19		[53..497]	[CLPTM1]	[Cleft lip and palate transmembrane protein 1 (CLPTM1); pfam05602]	[2][355..375][391..411][417..437][478..498][503..523]	[acetylation][transmembrane region][transmembrane region][transmembrane region][transmembrane region][transmembrane region]	[N-acetylalanine; propagated from UniProtKB/Swiss-Prot (O96005.1)][propagated from UniProtKB/Swiss-Prot (O96005.1)][propagated from UniProtKB/Swiss-Prot (O96005.1)][propagated from UniProtKB/Swiss-Prot (O96005.1)][propagated from UniProtKB/Swiss-Prot (O96005.1)][propagated from UniProtKB/Swiss-Prot (O96005.1)]
87	1	gi|16117796|ref|NP_378669.1|	gi|16117796|ref|NP_378669.1|	60S ribosomal protein L36 [Homo sapiens]	RPL36	2	4	4	2	0	4	20	0.00119737	1.41156	3	7	7	3	0	7	28.57	0.00084823	4.14976	3	9	9	3	0	9	28.57	0.00351921	105	12254	11.6	o	3	0.084	Q	15	19		[2..94]	[Ribosomal_L36e]	[Ribosomal protein L36e; pfam01158]	[62]	[acetylation]	[N6-acetyllysine; propagated from UniProtKB/Swiss-Prot (Q9Y3U8.3)]
88	1	gi|4506365|ref|NP_002856.1|	gi|4506365|ref|NP_002856.1|	ras-related protein Rab-2A isoform a [Homo sapiens]	RAB2A	4	17	17	4	0	17	26.42	0.00252041	1.4	6	30	30	6	0	30	36.79	0.00180049	6.13278	9	57	57	9	0	57	48.11	0.011039	212	23546	6.5	o	19	0.203	Q	19	8		[2..19][3..170][8..169][35..43]	[Required for interaction with PRKCI][Rab2][Ras][Effector region (By similarity)]	[propagated from UniProtKB/Swiss-Prot (P61019.1)][Rab GTPase family 2 (Rab2); cd01866][Ras family; pfam00071][propagated from UniProtKB/Swiss-Prot (P61019.1)]	[2][3..8][13..20][order(16..21,33,119..120,122,149..151)][order(21..32,35..37)][order(31,36..44)][order(36,40..47,54,56)][38][order(39,41..43,58,60,67..68,71,75,77..80,167)][order(39..40,42,60..61,68,70,72..74)][39..43][56..60][61..64][order(64,66..76)][67..72][75..79][84..89][111..116][119..122][149..151][165..170]	[acetylation][other][other][other][other][other][other][other][other][other][other][other][other][other][other][other][other][other][other][other][other]	[N-acetylalanine; propagated from UniProtKB/Swiss-Prot (P61019.1)][Rab subfamily motif 1 (RabSF1)][G1 box][GTP/Mg2+ binding site [chemical binding]][Rab subfamily motif 2 (RabSF2)][Switch I region][putative GEF interaction site [polypeptide binding]][G2 box][putative effector interaction site][putative GDI interaction site [polypeptide binding]][Rab family motif 1 (RabF1)][Rab family motif 2 (Rab…
89	1	gi|5803135|ref|NP_006852.1|	gi|5803135|ref|NP_006852.1|	ras-related protein Rab-35 isoform 1 [Homo sapiens]	RAB35	3	17	17	3	0	17	23.38	0.00265834	1.39968	4	30	30	4	0	30	23.88	0.00189902	1.3981	3	13	13	3	0	13	22.89	0.00265545	201	23025	8.3	o	35	0.139	Q	21	12		[3..201][10..170][37..45]	[Rab35][Ras][Effector region (By similarity)]	[Rab GTPase family 35 (Rab35); cd04110][Ras family; pfam00071][propagated from UniProtKB/Swiss-Prot (Q15286.1)]	[9..10][15..22][order(17..23,33,39..40,66,120..121,123,150..152)][23..39][order(33,38..46)][order(38,42..49,56,58)][40][order(41,43..45,60,62,69..70,73,77,79..82,168)][order(41..42,44,62..63,70,72,74..76)][41..45][58..62][63..66][order(66,68..78)][69..74][77..81][86..91][109..117][120..123][150..152][166..168][199..201]	[other][other][other][other][other][other][other][other][other][other][other][other][other][other][other][other][other][other][other][other][other]	[Rab subfamily motif 1 (RabSF1)][G1 box][GTP/Mg2+ binding site [chemical binding]][Rab subfamily motif 2 (RabSF2)][Switch I region][putative GEF interaction site [polypeptide binding]][G2 box][putative effector interaction site][putative GDI interaction site [polypeptide binding]][Rab family motif 1 (RabF1)][Rab family motif 2 (RabF2)][G3 box][Switch II region][Rab family motif 3 (RabF3)][Rab fam…
90	3	gi|385198061|ref|NP_001245238.1|;gi|385198063|ref|NP_001245239.1|;gi|76150625|ref|NP_001028886.1|	gi|385198061|ref|NP_001245238.1|	putative ribosomal RNA methyltransferase NOP2 isoform 3 [Homo sapiens]	NOP2	3	4	4	3	0	4	3.67	0.00014879	9.93333	1	1	1	1	0	1	2.25	1.506e-05	3.26667	1	1	1	1	0	1	1.78	4.859e-05	845	92860	9.2						12		[161..>194][333..618][420..548]	[GVQW][Nol1_Nop2_Fmu][AdoMet_MTases]	[Putative binding domain; pfam13900][NOL1/NOP2/sun family; pfam01189][S-adenosylmethionine-dependent methyltransferases (SAM or AdoMet-MTase), class I; AdoMet-MTases are enzymes that use S-adenosyl-L-methionine (SAM or AdoMet) as a substrate for methyltransfer, creating the product S-adenosyl-L-homocysteine (AdoHcy); cd02440]	[order(424..430,449..450,475..477,493)]	[other]	[S-adenosylmethionine binding site [chemical binding]]
91	1	gi|117190192|ref|NP_001070910.1|	gi|117190192|ref|NP_001070910.1|	heterogeneous nuclear ribonucleoproteins C1/C2 isoform a [Homo sapiens]	HNRNPC	2	4	4	2	0	4	7.52	0.00041086	9.78571	1	1	1	1	0	1	3.59	4.158e-05	3.19048	1	1	1	1	0	1	3.92	0.00013417	306	33670	5.1	o	36	0.077	Q	36	14		[15..85][17..82][155..161]	[RRM_hnRNPC][RRM][Nuclear localization signal (Potential)]	[RNA recognition motif in vertebrate heterogeneous nuclear ribonucleoprotein C1/C2 (hnRNP C1/C2); cd12603][RNA recognition motif; smart00360][propagated from UniProtKB/Swiss-Prot (P07910.4)]	[2][109][113][115][162][162][166][233][233][239][240][241][241][253][253][260][260][299][299][306][306]	[acetylation][phosphorylation][phosphorylation][phosphorylation][phosphorylation][phosphorylation][phosphorylation][phosphorylation][phosphorylation][phosphorylation][phosphorylation][phosphorylation][phosphorylation][phosphorylation][phosphorylation][phosphorylation][phosphorylation][phosphorylation][phosphorylation][phosphorylation][phosphorylation]	[N-acetylalanine; propagated from UniProtKB/Swiss-Prot (P07910.4)][Phosphothreonine; propagated from UniProtKB/Swiss-Prot (P07910.4)][Phosphoserine; propagated from UniProtKB/Swiss-Prot (P07910.4)][Phosphoserine; propagated from UniProtKB/Swiss-Prot (P07910.4)][][Phosphoserine; propagated from UniProtKB/Swiss-Prot (P07910.4)][Phosphoserine; propagated from UniProtKB/Swiss-Prot (P07910.4)][][Phosp…
92	1	gi|14389309|ref|NP_116093.1|	gi|14389309|ref|NP_116093.1|	tubulin alpha-1C chain [Homo sapiens]	TUBA1C	14	95	3	1	92	95	46.33	0.0066502	9.26184	11	120	0	0	120	25.3333	34.97	0.00071788	0.110028	3	3	0	0	3	0.866667	11.8	7.925e-05	449	49895	5.1	o	20	0.128	Q	20	12		[1..448][2..435]	[PTZ00335][alpha_tubulin]	[tubulin alpha chain; Provisional][The alpha-tubulin family; cd02186]	[order(2,199,253..254,256..258,260..261,326,352)][order(11..12,15,71,101,143..146,171,206,224,228)][48][48][order(72..73,100..102,105,181,183,224)][83][282][357][432][439][439][449][449]	[other][other][phosphorylation][phosphorylation][other][modified][modified][phosphorylation][phosphorylation][phosphorylation][phosphorylation][phosphorylation][other]	[beta/alpha domain interface [polypeptide binding]][nucleotide binding site [chemical binding]][][Phosphoserine. {ECO:0000250|UniProtKB:P68366}; propagated from UniProtKB/Swiss-Prot (Q9BQE3.1)][alpha/beta domain interface [polypeptide binding]][Nitrated tyrosine. {ECO:0000250|UniProtKB:P68368}; propagated from UniProtKB/Swiss-Prot (Q9BQE3.1)][Nitrated tyrosine. {ECO:0000250|UniProtKB:P68373}; pro…
93	2	gi|378744165|ref|NP_001243755.1|;gi|42476169|ref|NP_061961.2|	gi|378744165|ref|NP_001243755.1|	RNA polymerase II-associated factor 1 homolog isoform 2 [Homo sapiens]	PAF1	1	3	3	1	0	3	3.51	0.00019442	7.46154	1	1	1	1	0	1	3.51	2.623e-05	6.5	1	2	2	1	0	2	2.89	0.00016931	485	55473	5.4						19		[17..361]	[Paf1]	[Paf1; pfam03985]
94	1	gi|301171345|ref|NP_001180343.1|	gi|301171345|ref|NP_001180343.1|	tubulin alpha-8 chain isoform 2 [Homo sapiens]	TUBA8	8	57	0	0	57	2	31.07	0.00016413	7.45455	7	63	0	0	63	0.666667	27.15	2.215e-05	0.954545	1	1	0	0	1	0.2	4.7	2.144e-05	383	42954	5.1	o	15	0.048	Q	0	22		[1..373][1..369]	[PTZ00335][alpha_tubulin]	[tubulin alpha chain; Provisional][The alpha-tubulin family; cd02186]	[order(6..7,34..36,39,115,117,158)][order(133,187..188,190..192,194..195,260,286)]	[other][other]	[alpha/beta domain interface [polypeptide binding]][beta/alpha domain interface [polypeptide binding]]
95	6	gi|222144313|ref|NP_001136096.2|;gi|222144317|ref|NP_001138414.1|;gi|222144319|ref|NP_001138415.1|;gi|372266169|ref|NP_001243205.1|;gi|372266171|ref|NP_001243206.1|;gi|372266173|ref|NP_001243207.1|	gi|222144313|ref|NP_001136096.2|	ras-related protein Rab-34 isoform 2 [Homo sapiens]	RAB34	1	2	2	1	0	2	4.87	0.0002041	4.97561	1	1	1	1	0	1	4.87	4.131e-05	6.5122	2	2	2	2	0	2	10.06	0.00026661	308	34370	8.5						17		[110..269][111..262]	[Rab36_Rab34][Ras]	[Rab GTPase families 34 (Rab34) and 36 (Rab36); cd04108][Ras family; pfam00071]	[110..111][116..123][order(118..124,134,140..141,167,247..249)][124..140][order(134,139..147)][order(139,143..150,157,159)][141][order(142,144..146,161,163,170..171,174,178,180..183,265)][order(142..143,145,163..164,171,173,175..177)][142..146][159..163][164..167][order(167,169..179)][170..175][178..182][187..192][216..220][247..249][263..267][268..269]	[other][other][other][other][other][other][other][other][other][other][other][other][other][other][other][other][other][other][other][other]	[Rab subfamily motif 1 (RabSF1)][G1 box][GTP/Mg2+ binding site [chemical binding]][Rab subfamily motif 2 (RabSF2)][Switch I region][putative GEF interaction site [polypeptide binding]][G2 box][putative effector interaction site][putative GDI interaction site [polypeptide binding]][Rab family motif 1 (RabF1)][Rab family motif 2 (RabF2)][G3 box][Switch II region][Rab family motif 3 (RabF3)][Rab fam…
96	1	gi|4504447|ref|NP_002128.1|	gi|4504447|ref|NP_002128.1|	heterogeneous nuclear ribonucleoproteins A2/B1 isoform A2 [Homo sapiens]	HNRNPA2B1	8	14	14	8	0	14	36.36	0.00129042	4.94253	3	7	7	3	0	7	16.13	0.00026119	0.923372	1	2	2	1	0	2	7.33	0.00024081	341	36006	8.6	o	27	0.051	Q	25	7		[7..87][10..80][100..179][101..172][290..315]	[RRM1_hnRNPA2B1][RRM][RRM2_hnRNPA2B1][RRM][HnRNPA1]	[RNA recognition motif 1 in heterogeneous nuclear ribonucleoprotein A2/B1 (hnRNP A2/B1) and similar proteins; cd12762][RNA recognition motif; smart00360][RNA recognition motif 2 in heterogeneous nuclear ribonucleoprotein A2/B1 (hnRNP A2/B1) and similar proteins; cd12581][RNA recognition motif; smart00360][Nuclear factor hnRNPA1; pfam11627]	[order(10,12,14..15,37,39,41,50..52,54,77,80,82..87)][191][329][332]	[other][methylation][phosphorylation][phosphorylation]	[putative DNA binding site [nucleotide binding]][][][]
97	2	gi|350276261|ref|NP_001231874.1|;gi|350276263|ref|NP_001231875.1|	gi|350276261|ref|NP_001231874.1|	metalloreductase STEAP2 isoform b [Homo sapiens]	STEAP2	1	2	2	1	0	2	2.64	0.00013846	4.92857	1	1	1	1	0	1	2.64	2.803e-05	3.21429	1	1	1	1	0	1	2.2	9.043e-05	454	52052	8.6	o210-232i262-284o304-323i360-382o392-414i427-449o	25	0.056	Q	25	7		[32..217][32..118][261..407]	[COG2085][F420_oxidored][Ferric_reduct]	[Predicted dinucleotide-binding enzyme [General function prediction only]][NADP oxidoreductase coenzyme F420-dependent; pfam03807][Ferric reductase like transmembrane component; pfam01794]	[3][9][12][208..228][259..279][305..325][359..379][393..413]	[phosphorylation][phosphorylation][phosphorylation][transmembrane region][transmembrane region][transmembrane region][transmembrane region][transmembrane region]	[Phosphoserine. {ECO:0000250|UniProtKB:Q658P3}; propagated from UniProtKB/Swiss-Prot (Q8NFT2.3)][Phosphoserine. {ECO:0000250|UniProtKB:Q658P3}; propagated from UniProtKB/Swiss-Prot (Q8NFT2.3)][Phosphoserine. {ECO:0000250|UniProtKB:Q658P3}; propagated from UniProtKB/Swiss-Prot (Q8NFT2.3)][propagated from UniProtKB/Swiss-Prot (Q8NFT2.3)][propagated from UniProtKB/Swiss-Prot (Q8NFT2.3)][propagated f…
98	2	gi|310689049|ref|NP_001185486.1|;gi|5031877|ref|NP_005564.1|	gi|310689049|ref|NP_001185486.1|	lamin-B1 isoform 2 [Homo sapiens]	LMNB1	2	2	2	2	0	2	3.99	0.00016719	4.91176	1	1	1	1	0	1	3.46	3.384e-05	3.20588	1	1	1	1	0	1	4.26	0.0001092	376	43024	5.1						5		[<1..177][229..339]	[Filament][LTD]	[Intermediate filament protein; pfam00038][Lamin Tail Domain; pfam00932]
99	1	gi|156151394|ref|NP_001095868.1|	gi|156151394|ref|NP_001095868.1|	heterogeneous nuclear ribonucleoprotein R isoform 1 [Homo sapiens]	HNRNPR	4	6	6	4	0	6	7.55	0.00029652	3.3	3	6	4	2	2	4.5	5.82	9.002e-05	2.15556	3	3	3	3	0	3	6.45	0.00019367	636	71214	8.1	o	37	0.016	Q	0	1		[106..631][164..242][244..331][343..414][415..421][450..570][465..500]	[hnRNP-R-Q][RRM_SF][RRM_SF][RRM3_hnRNPR][Nuclear localization signal (Potential)][RNA-binding RGG-box][3 X 11 AA approximate repeats of D-D-Y-Y-G-Y-D-Y-H-D-Y]	[heterogeneous nuclear ribonucleoprotein R, Q family; TIGR01648][RNA recognition motif (RRM) superfamily; cl17169][RNA recognition motif (RRM) superfamily; cl17169][RNA recognition motif 3 in vertebrate heterogeneous nuclear ribonucleoprotein R (hnRNP R); cd12494][propagated from UniProtKB/Swiss-Prot (O43390.1)][propagated from UniProtKB/Swiss-Prot (O43390.1)][propagated from UniProtKB/Swiss-Prot…	[2][369]	[acetylation][acetylation]	[N-acetylalanine; propagated from UniProtKB/Swiss-Prot (O43390.1)][N6-acetyllysine; propagated from UniProtKB/Swiss-Prot (O43390.1)]
100	1	gi|8922720|ref|NP_060717.1|	gi|8922720|ref|NP_060717.1|	cell cycle control protein 50A isoform 1 [Homo sapiens]	TMEM30A	2	4	4	2	0	4	6.93	0.00034827	3.28302	1	3	3	1	0	3	4.71	0.00010574	2.14151	1	2	2	1	0	2	2.22	0.00022746	361	40684	8.6	i44-66o324-346i	68	0.112	A	0	6		[70..353]	[CDC50]	[LEM3 (ligand-effect modulator 3) family / CDC50 family; pfam03381]	[2][50..70][326..346]	[acetylation][transmembrane region][transmembrane region]	[N-acetylalanine; propagated from UniProtKB/Swiss-Prot (Q9NV96.1)][propagated from UniProtKB/Swiss-Prot (Q9NV96.1)][propagated from UniProtKB/Swiss-Prot (Q9NV96.1)]
101	1	gi|38016911|ref|NP_004090.4|	gi|38016911|ref|NP_004090.4|	erythrocyte band 7 integral membrane protein isoform a [Homo sapiens]	STOM	2	5	5	2	0	5	12.15	0.00054568	3.08475	1	4	4	1	0	4	5.56	0.00017671	2.41808	2	3	3	2	0	3	9.72	0.00042768	288	31731	7.9	o32-54i	46	0.311	A	46	9		[34..282][73..274][265..273][267..269][273..287]	[HflC][SPFH_stomatin][Required for homooligomerization][Required for lipid raft association][Interaction with LANCL1]	[Regulator of protease activity HflC, stomatin/prohibitin superfamily [Posttranslational modification, protein turnover, chaperones]; COG0330][Stomatin, a subgroup of the stomatin-like proteins (slipins) family; belonging to the SPFH (stomatin, prohibitin, flotillin, and HflK/C) superfamily; cd03403][propagated from UniProtKB/Swiss-Prot (P27105.3)][propagated from UniProtKB/Swiss-Prot (P27105.3)]…	[10][10][30][93][188][244]	[phosphorylation][phosphorylation][modified][modified][modified][phosphorylation]	[][Phosphoserine, by PKA; propagated from UniProtKB/Swiss-Prot (P27105.3)][palmitoylation site][sumoylation site][sumoylation site][Phosphoserine; propagated from UniProtKB/Swiss-Prot (P27105.3)]
102	1	gi|11345462|ref|NP_068747.1|	gi|11345462|ref|NP_068747.1|	signal peptidase complex subunit 3 [Homo sapiens]	SPCS3	2	6	6	2	0	6	12.78	0.0010477	2.96884	2	5	5	2	0	5	12.78	0.00035343	2.58357	2	4	4	2	0	4	11.67	0.00091239	180	20313	8.6	o10-32i	21	0.677	S	26	4		[1..175]	[SPC22]	[Signal peptidase subunit; pfam04573]	[12..32]	[transmembrane region]	[propagated from UniProtKB/Swiss-Prot (P61009.1)]
103	1	gi|238776833|ref|NP_005773.3|	gi|238776833|ref|NP_005773.3|	THO complex subunit 4 [Homo sapiens]	ALYREF	2	6	6	2	0	6	14.77	0.00071434	2.96266	1	5	5	1	0	5	6.82	0.00024097	1.93776	2	3	3	2	0	3	10.98	0.00046656	264	27558	11.1						17		[114..187][114..185]	[RRM_THOC4][RRM]	[RNA recognition motif in THO complex subunit 4 (THOC4) and similar proteins; cd12680][RNA recognition motif; smart00360]	[order(131..132,135..136,168..169,171..174,176..180,183)]	[other]	[peptide binding site [polypeptide binding]]
104	1	gi|55749932|ref|NP_001918.3|	gi|55749932|ref|NP_001918.3|	desmin [Homo sapiens]	DES	3	21	18	1	3	19.287	6.38	0.00128981	2.80435	1	17	17	1	0	17	2.77	0.00046021	0.569565	1	3	3	1	0	3	2.77	0.00026207	470	53536	5.3	o	34	0.07	Q	37	2		[1..107][9..106][107..415][108..411][412..469]	[head][Filament_head][Filament][rod][tail]	[][Intermediate filament head (DNA binding) region; pfam04732][Intermediate filament protein; pfam00038][][]	[12][12][17][17][60][60][76][77]	[phosphorylation][phosphorylation][phosphorylation][phosphorylation][phosphorylation][phosphorylation][phosphorylation][phosphorylation]	[][Phosphoserine, by AURKB; propagated from UniProtKB/Swiss-Prot (P17661.3)][][Phosphothreonine, by AURKB; propagated from UniProtKB/Swiss-Prot (P17661.3)][][Phosphoserine, by AURKB; propagated from UniProtKB/Swiss-Prot (P17661.3)][][]
105	2	gi|21314671|ref|NP_060106.2|;gi|304766677|ref|NP_001182156.1|	gi|21314671|ref|NP_060106.2|	transient receptor potential cation channel subfamily M member 4 isoform 1 [Homo sapiens]	TRPM4	1	1	1	1	0	1	1.24	2.589e-05	2.6	1	1	1	1	0	1	1.07	1.048e-05	10.1	1	3	3	1	0	3	1.81	0.00010146	1214	134301	8.2	o688-710i772-794o887-909i930-952o1018-1040i	36	0.083	Q	36	19		[<252..>307][981..986][1076..1176][1136..1141]	[crotonase-like][Selectivity filter][Calmodulin-binding][Mediates modulation by decavanadate and PIP2-binding]	[Crotonase/Enoyl-Coenzyme A (CoA) hydratase superfamily. This superfamily contains a diverse set of enzymes including enoyl-CoA hydratase, napthoate synthase, methylmalonyl-CoA decarboxylase, 3-hydoxybutyryl-CoA dehydratase, and dienoyl-CoA isomerase; cl21466][propagated from UniProtKB/Swiss-Prot (Q8TD43.1)][propagated from UniProtKB/Swiss-Prot (Q8TD43.1)][propagated from UniProtKB/Swiss-Prot (Q8…	[684..704][777..797][869..889][893..913][930..950][1020..1040][1145][1152]	[transmembrane region][transmembrane region][transmembrane region][transmembrane region][transmembrane region][transmembrane region][phosphorylation][phosphorylation]	[propagated from UniProtKB/Swiss-Prot (Q8TD43.1)][propagated from UniProtKB/Swiss-Prot (Q8TD43.1)][propagated from UniProtKB/Swiss-Prot (Q8TD43.1)][propagated from UniProtKB/Swiss-Prot (Q8TD43.1)][propagated from UniProtKB/Swiss-Prot (Q8TD43.1)][propagated from UniProtKB/Swiss-Prot (Q8TD43.1)][Phosphoserine, by PKC. {ECO:0000305|PubMed:15590641}; propagated from UniProtKB/Swiss-Prot (Q8TD43.1)][P…
106	1	gi|73747889|ref|NP_003174.3|	gi|73747889|ref|NP_003174.3|	disintegrin and metalloproteinase domain-containing protein 17 preproprotein [Homo sapiens]	ADAM17	1	1	1	1	0	1	1.46	3.814e-05	2.53333	1	1	1	1	0	1	1.94	1.544e-05	13.2667	2	4	4	2	0	4	3.88	0.00019931	824	93021	5.8	o672-694i	18	0.756	S	18	2	3.4.24.86	[42..167][182..189][223..477][484..560][580..642][603..671][731..738][741..748]	[Pep_M12B_propep][Cysteine switch. {ECO:0000250}][ZnMc_TACE_like][DISIN][ADAM17_MPD][Crambin-like][SH3-binding. {ECO:0000255}][SH3-binding. {ECO:0000255}]	[Reprolysin family propeptide; pfam01562][propagated from UniProtKB/Swiss-Prot (P78536.1)][Zinc-dependent metalloprotease; TACE_like subfamily. TACE, the tumor-necrosis factor-alpha converting enzyme, releases soluble TNF-alpha from transmembrane pro-TNF-alpha; cd04270][Homologues of snake disintegrins; smart00050][Membrane-proximal domain of a disintegrin and metalloprotease 17 (ADAM17); cd14246…	[379][382][order(405..406,409,415)][order(600,635)][600..603][672..692][735][767][791][791][791][819][819]	[phosphorylation][phosphorylation][active][other][other][transmembrane region][phosphorylation][phosphorylation][phosphorylation][modified][phosphorylation][phosphorylation][phosphorylation]	[][][][putative molecular switch][CxxC motif][propagated from UniProtKB/Swiss-Prot (P78536.1)][Phosphothreonine, by MAPK14. {ECO:0000269|PubMed:12058067, ECO:0000269|PubMed:20188673}; propagated from UniProtKB/Swiss-Prot (P78536.1)][Phosphoserine. {ECO:0000250|UniProtKB:Q9Z1K9}; propagated from UniProtKB/Swiss-Prot (P78536.1)][][dephosphorylation site][Phosphoserine. {ECO:0000244|PubMed:17081983,…
107	2	gi|4506289|ref|NP_002818.1|;gi|519666804|ref|NP_001265547.1|	gi|4506289|ref|NP_002818.1|	tyrosine-protein phosphatase non-receptor type 1 isoform 1 [Homo sapiens]	PTPN1	1	1	1	1	0	1	2.53	7.226e-05	2.48276	1	1	1	1	0	1	2.53	2.925e-05	6.51724	1	2	2	1	0	2	2.53	0.00018877	435	49967	6.3	o409-431i	29	0.026	Q	0	20	3.1.3.48	[3..276][43..276][215..221]	[PTPc][PTPc][Substrate binding (By similarity)]	[Protein tyrosine phosphatase, catalytic domain; smart00194][Protein tyrosine phosphatases (PTP) catalyze the dephosphorylation of phosphotyrosine peptides; they regulate phosphotyrosine levels in signal transduction pathways. The depth of the active site cleft renders the enzyme specific for phosphorylated Tyr...; cd00047][propagated from UniProtKB/Swiss-Prot (P18031.1)]	[1][1][20][20][50][50][50][50][66][66][66][152][153][order(181,214..215,218,221..222)][215][215][215][242][242][242][243][243][243][295][352][352][352][378][378][378][386][386][386][386]	[acetylation][acetylation][phosphorylation][phosphorylation][phosphorylation][phosphorylation][phosphorylation][phosphorylation][phosphorylation][phosphorylation][phosphorylation][phosphorylation][phosphorylation][active][sulfatation][modified][nitrosylation][phosphorylation][phosphorylation][phosphorylation][phosphorylation][phosphorylation][phosphorylation][phosphorylation][phosphorylation][pho…	[][N-acetylmethionine; propagated from UniProtKB/Swiss-Prot (P18031.1)][][Phosphotyrosine; propagated from UniProtKB/Swiss-Prot (P18031.1)][][][][Phosphoserine, by PKB/AKT1, CLK1 and CLK2; propagated from UniProtKB/Swiss-Prot (P18031.1)][][][Phosphotyrosine, by EGFR; propagated from UniProtKB/Swiss-Prot (P18031.1)][][][][Cysteine persulfide; propagated from UniProtKB/Swiss-Prot (P18031.1)][glutat…
108	3	gi|157426845|ref|NP_065817.2|;gi|157426847|ref|NP_001098713.1|;gi|296434287|ref|NP_001171809.1|	gi|157426845|ref|NP_065817.2|	protocadherin-19 isoform b precursor [Homo sapiens]	PCDH19	1	2	2	1	0	2	1.09	5.715e-05	2.47826	1	2	2	1	0	2	1.09	2.313e-05	4.86957	1	3	3	1	0	3	1.91	0.00011197	1100	121013	5.3	o679-701i	22	0.937	S	22	X		[27..125][133..234][242..342][356..449][458..559][574..662]	[Cadherin_repeat][Cadherin_repeat][Cadherin_repeat][Cadherin_repeat][Cadherin_repeat][Cadherin_repeat]	[Cadherin tandem repeat domain; cd11304][Cadherin tandem repeat domain; cd11304][Cadherin tandem repeat domain; cd11304][Cadherin tandem repeat domain; cd11304][Cadherin tandem repeat domain; cd11304][Cadherin tandem repeat domain; cd11304]	[order(31..32,88,90,121,123..124)][order(140..141,197,199,230,232..233)][order(249..250,305,307,338,340..341)][order(360..361,412,414,445,447..448)][order(464..465,522,524,555,557..558)][order(579..580,631,633)]	[other][other][other][other][other][other]	[Ca2+ binding site [ion binding]][Ca2+ binding site [ion binding]][Ca2+ binding site [ion binding]][Ca2+ binding site [ion binding]][Ca2+ binding site [ion binding]][Ca2+ binding site [ion binding]]
109	1	gi|4505991|ref|NP_000934.1|	gi|4505991|ref|NP_000934.1|	peptidyl-prolyl cis-trans isomerase C precursor [Homo sapiens]	PPIC	1	2	2	1	0	2	6.13	0.00029652	2.475	1	2	2	1	0	2	6.13	0.00012003	3.225	1	2	2	1	0	2	6.13	0.00038733	212	22763	8.4	i7-29o	29	0.679	S	24	5	5.2.1.8	[39..197]	[cyclophilin]	[cyclophilin: cyclophilin-type peptidylprolyl cis- trans isomerases. This family contains eukaryotic, bacterial and archeal proteins which exhibit a peptidylprolyl cis- trans isomerases activity (PPIase, Rotamase) and in addition bind the...; cl00197]	[78][order(89,91,94..95,97,135..136,145,147,155..156,160)][159]	[modified][active][acetylation]	[N6-succinyllysine. {ECO:0000250|UniProtKB:Q99KR7}; propagated from UniProtKB/Swiss-Prot (P45877.1)][][N6-acetyllysine. {ECO:0000250|UniProtKB:Q99KR7}; propagated from UniProtKB/Swiss-Prot (P45877.1)]
110	1	gi|4506707|ref|NP_001019.1|	gi|4506707|ref|NP_001019.1|	40S ribosomal protein S25 [Homo sapiens]	RPS25	2	3	3	2	0	3	16	0.00075434	2.47213	2	3	3	2	0	3	14.4	0.00030536	1.07541	1	1	1	1	0	1	7.2	0.00032846	125	13742	10.1	i	39	0.011	Q	0	11		[<39..113]	[Ribosomal_S25]	[S25 ribosomal protein; pfam03297]	[52][60][66][94]	[acetylation][acetylation][acetylation][acetylation]	[N6-acetyllysine, alternate; propagated from UniProtKB/Swiss-Prot (P62851.1)][N6-acetyllysine; propagated from UniProtKB/Swiss-Prot (P62851.1)][N6-acetyllysine; propagated from UniProtKB/Swiss-Prot (P62851.1)][N6-acetyllysine, alternate; propagated from UniProtKB/Swiss-Prot (P62851.1)]
111	1	gi|4505357|ref|NP_002480.1|	gi|4505357|ref|NP_002480.1|	NADH dehydrogenase [ubiquinone] 1 alpha subcomplex subunit 4 [Homo sapiens]	NDUFA4	1	1	1	1	0	1	12.35	0.00038804	2.47134	1	1	1	1	0	1	12.35	0.00015708	9.6879	1	3	3	1	0	3	12.35	0.00152064	81	9370	9.4	o15-37i	29	0.47	S	29	7	1.6.5.3;1.6.99.3	[10..81]	[B12D]	[NADH-ubiquinone reductase complex 1 MLRQ subunit; pfam06522]	[10][66]	[acetylation][phosphorylation]	[N6-acetyllysine. {ECO:0000250|UniProtKB:Q62425}; propagated from UniProtKB/Swiss-Prot (O00483.1)][Phosphoserine. {ECO:0000250|UniProtKB:Q62425}; propagated from UniProtKB/Swiss-Prot (O00483.1)]
112	1	gi|4503363|ref|NP_003850.1|	gi|4503363|ref|NP_003850.1|	dolichol-phosphate mannosyltransferase [Homo sapiens]	DPM1	1	2	2	1	0	2	4.23	0.00024178	2.46939	1	2	2	1	0	2	4.23	9.787e-05	1.61224	1	1	1	1	0	1	4.23	0.00015791	260	29634	9.6	o	16	0.065	Q	53	20	2.4.1.83	[26..>251][29..256]	[WcaA][DPM1_like]	[Glycosyltransferase involved in cell wall bisynthesis [Cell wall/membrane/envelope biogenesis]; COG0463][DPM1_like represents putative enzymes similar to eukaryotic DPM1; cd06442]	[2][3][7][9][9][order(32,34,120)][order(65,119..120)][118..120]	[acetylation][phosphorylation][phosphorylation][phosphorylation][phosphorylation][other][other][other]	[N-acetylalanine. {ECO:0000244|PubMed:20068231, ECO:0000244|PubMed:21406692, ECO:0000244|PubMed:22814378}; propagated from UniProtKB/Swiss-Prot (O60762.1)][][][][Phosphoserine. {ECO:0000244|PubMed:20068231, ECO:0000244|PubMed:21406692}; propagated from UniProtKB/Swiss-Prot (O60762.1)][Ligand binding site][Putative Catalytic site][DXD motif]
113	1	gi|525459422|ref|NP_001265867.1|	gi|525459422|ref|NP_001265867.1|	receptor-binding cancer antigen expressed on SiSo cells [Homo sapiens]	EBAG9	1	1	1	1	0	1	8.92	0.00014756	2.46667	1	1	1	1	0	1	11.27	5.973e-05	12.85	2	4	4	2	0	4	20.19	0.00077103	213	24377	6.3	o	21	0.551	S	28	8		[<160..203]	[DUF1682]	[Protein of unknown function (DUF1682); pfam07946]	[7..27][36][41][94]	[transmembrane region][phosphorylation][phosphorylation][phosphorylation]	[propagated from UniProtKB/Swiss-Prot (O00559.1)][Phosphoserine; propagated from UniProtKB/Swiss-Prot (O00559.1)][Phosphothreonine; propagated from UniProtKB/Swiss-Prot (O00559.1)][Phosphotyrosine; propagated from UniProtKB/Swiss-Prot (O00559.1)]
114	2	gi|27544941|ref|NP_036467.2|;gi|55956916|ref|NP_004989.2|	gi|27544941|ref|NP_036467.2|	unconventional myosin-If [Homo sapiens]	MYO1F	1	3	3	1	0	3	1.55	8.588e-05	2.45714	1	3	3	1	0	3	1.55	3.476e-05	1.05714	1	1	1	1	0	1	1.55	3.739e-05	1098	124844	9.1	o	35	0.074	Q	35	19		[12..690][31..677][579..589][716..918][1045..1097]	[MYSc][MYSc_Myo1][Actin-binding. {ECO:0000255}][Myosin_TH1][SH3_MyoIe_If_like]	[Myosin. Large ATPases; smart00242][class I myosin, motor domain; cd01378][propagated from UniProtKB/Swiss-Prot (O00160.3)][Myosin tail; pfam06017][Src homology 3 domain of Myosins Ie, If, and similar proteins; cd11827]	[order(58..61,66,110..117,157..167,386..391)][order(58..61,66)][110..117][157..167][386..391][order(415..426,429..436,438)][609..619][order(621..647,664..677)][734][1023][order(1050,1052,1055,1059,1077..1078,1091,1093..1094)]	[other][other][other][other][other][other][other][other][phosphorylation][phosphorylation][other]	[ATP binding site [chemical binding]][purine-binding loop][P-loop][switch I region][switch II region][relay loop][SH1 helix][converter subdomain][][Phosphoserine. {ECO:0000244|PubMed:19367720}; propagated from UniProtKB/Swiss-Prot (O00160.3)][peptide ligand binding site [polypeptide binding]]
115	2	gi|18860902|ref|NP_002835.2|;gi|208431815|ref|NP_001129120.1|	gi|18860902|ref|NP_002835.2|	receptor-type tyrosine-protein phosphatase kappa isoform b precursor [Homo sapiens]	PTPRK	2	2	2	2	0	2	1.94	4.365e-05	2.44444	1	2	2	1	0	2	1.6	1.767e-05	1.61111	1	1	1	1	0	1	1.04	2.851e-05	1440	162173	5.9	i5-24o754-775i	28	0.752	S	28	6	3.1.3.48	[32..192][36..192][198..288][202..288][292..384][488..589][887..1141][914..1141][1083..1089][1174..1435][1203..1435]	[MAM][MAM][Ig_2][IG_like][FN3][FN3][PTPc][PTPc][Substrate binding. {ECO:0000250}][PTPc][PTPc]	[Domain in meprin, A5, receptor protein tyrosine phosphatase mu (and others); smart00137][Meprin, A5 protein, and protein tyrosine phosphatase Mu (MAM) domain. MAM is an extracellular domain which mediates protein-protein interactions and is found in a diverse set of proteins, many of which are known to function in cell adhesion. Members...; cd06263][Immunoglobulin domain; pfam13895][Immunoglobul…	[order(292,355,372)][order(373..374,376..377)][order(563,578)][order(579..580,581..582)][643..644][754..775][857][order(1051,1082..1083,1086,1089..1090)][order(1341,1376..1377,1380,1383..1384)]	[other][other][other][other][cleavage][transmembrane region][phosphorylation][active][active]	[Interdomain contacts][Cytokine receptor motif][Interdomain contacts][Cytokine receptor motif][Cleavage. {ECO:0000305}; propagated from UniProtKB/Swiss-Prot (Q15262.2)][propagated from UniProtKB/Swiss-Prot (Q15262.2)][Phosphoserine. {ECO:0000250|UniProtKB:P35822}; propagated from UniProtKB/Swiss-Prot (Q15262.2)][][]
116	2	gi|14149607|ref|NP_001278.1|;gi|167466160|ref|NP_001107803.1|	gi|14149607|ref|NP_001278.1|	H(+)/Cl(-) exchange transporter 7 isoform a [Homo sapiens]	CLCN7	1	2	2	1	0	2	2.36	7.809e-05	2.4375	1	2	2	1	0	2	2.36	3.161e-05	3.1875	1	2	2	1	0	2	2.36	0.00010201	805	88679	8.4	i126-148o184-206i227-244o288-310i322-344o377-399i412-434o493-515i520-542o547-569i576-598o	34	0.028	Q	46	16		[95..620][203..207][245..249][512..516][636..790][738..>795]	[ClC_6_like][Selectivity filter part_1. {ECO:0000250}][Selectivity filter part_2. {ECO:0000250}][Selectivity filter part_3. {ECO:0000250}][CBS_pair_EriC_assoc_euk_bac][CBS]	[ClC-6-like chloride channel proteins. This CD includes ClC-6, ClC-7 and ClC-B, C, D in plants. Proteins in this family are ubiquitous in eukarotes and their functions are unclear. They are expressed in intracellular organelles membranes. This family...; cd03685][propagated from UniProtKB/Swiss-Prot (P51798.2)][propagated from UniProtKB/Swiss-Prot (P51798.2)][propagated from UniProtKB/Swiss-Prot …	[9][60][127..159][174..197][order(203..207,245..249,512..516,602)][223..241][247..264][247][247][314][314][322..341][375..405][410..432][487..507][512..535][579..597]	[phosphorylation][phosphorylation][transmembrane region][transmembrane region][other][transmembrane region][transmembrane region][other][other][other][other][transmembrane region][transmembrane region][transmembrane region][transmembrane region][transmembrane region][transmembrane region]	[Phosphoserine. {ECO:0000250|UniProtKB:O70496}; propagated from UniProtKB/Swiss-Prot (P51798.2)][Phosphoserine. {ECO:0000244|PubMed:24275569}; propagated from UniProtKB/Swiss-Prot (P51798.2)][propagated from UniProtKB/Swiss-Prot (P51798.2)][propagated from UniProtKB/Swiss-Prot (P51798.2)][putative Cl- selectivity filter][propagated from UniProtKB/Swiss-Prot (P51798.2)][propagated from UniProtKB/S…
117	1	gi|44680148|ref|NP_976072.1|	gi|44680148|ref|NP_976072.1|	solute carrier family 23 member 2 [Homo sapiens]	SLC23A2	1	1	1	1	0	1	2.77	4.836e-05	2.4	1	1	1	1	0	1	2.62	1.957e-05	6.3	1	2	2	1	0	2	2.77	0.00012633	650	70337	7.7	i98-120o135-154i217-239o270-289i310-332o370-392i461-483o487-509i516-534o549-568i	42	0.02	Q	46	20		[90..523][103..531]	[Sulfate_transp][Xan_ur_permease]	[Sulfate transporter family; cl19250][Permease family; pfam00860]	[70][75][78][79][81][111..131][140..160][162..182][219..239][267..284][310..330][372..392][418..438][462..482][486..506][517..537][548..568][649]	[phosphorylation][phosphorylation][phosphorylation][phosphorylation][phosphorylation][transmembrane region][transmembrane region][transmembrane region][transmembrane region][transmembrane region][transmembrane region][transmembrane region][transmembrane region][transmembrane region][transmembrane region][transmembrane region][transmembrane region][phosphorylation]	[Phosphoserine. {ECO:0000250|UniProtKB:Q9EPR4}; propagated from UniProtKB/Swiss-Prot (Q9UGH3.1)][Phosphothreonine. {ECO:0000250|UniProtKB:Q9WTW8}; propagated from UniProtKB/Swiss-Prot (Q9UGH3.1)][Phosphoserine. {ECO:0000250|UniProtKB:Q9EPR4}; propagated from UniProtKB/Swiss-Prot (Q9UGH3.1)][Phosphothreonine. {ECO:0000250|UniProtKB:Q9EPR4}; propagated from UniProtKB/Swiss-Prot (Q9UGH3.1)][Phosphos…
118	1	gi|112380628|ref|NP_005552.3|	gi|112380628|ref|NP_005552.3|	lysosome-associated membrane glycoprotein 1 precursor [Homo sapiens]	LAMP1	1	9	9	1	0	9	2.64	0.00067837	2.22295	1	10	10	1	0	10	2.64	0.00030512	0.967213	1	3	3	1	0	3	2.64	0.00029538	417	44882	8.7	i11-33o384-406i	29	0.932	S	29	13		[29..194][111..417][195..227][228..382][381..411]	[First lumenal domain][Lamp][Hinge][Second lumenal domain][TM_EGFR-like]	[propagated from UniProtKB/Swiss-Prot (P11279.3)][Lysosome-associated membrane glycoprotein (Lamp); pfam01299][propagated from UniProtKB/Swiss-Prot (P11279.3)][propagated from UniProtKB/Swiss-Prot (P11279.3)][Transmembrane domain of the Epidermal Growth Factor Receptor family of Protein Tyrosine Kinases; cd12087]	[37][45][62][76][84][103][107][121][130][165][181][197][199][200][207][209][211][223][228][241][249][261][293][322][order(382..383,386..387,389..391,393..394,397)][383..405]	[glycosylation][glycosylation][glycosylation][glycosylation][glycosylation][glycosylation][glycosylation][glycosylation][glycosylation][glycosylation][glycosylation][glycosylation][glycosylation][glycosylation][glycosylation][glycosylation][glycosylation][glycosylation][glycosylation][glycosylation][glycosylation][glycosylation][glycosylation][glycosylation][other][transmembrane region]	[][][][][][][][][][][][][][][][][][][][][][][][][dimer interface [polypeptide binding]][propagated from UniProtKB/Swiss-Prot (P11279.3)]
119	1	gi|74099697|ref|NP_001027565.1|	gi|74099697|ref|NP_001027565.1|	heterogeneous nuclear ribonucleoprotein H2 [Homo sapiens]	HNRNPH2	4	17	3	1	14	10.8	13.36	0.00075602	2.15385	4	13	2	1	11	12.4	13.36	0.00035138	0.521368	1	4	0	0	4	2	3.79	0.00018288	449	49264	6.3	o	25	0.188	Q	25	X		[10..88][13..84][93..188][113..182][234..433][257..290][289..364][291..358][354..392]	[RRM1_hnRNPH_hnRNPH2_hnRNPF][RRM_6][RRM_SF][RRM_6][2 X 16 AA Gly-rich approximate repeats][zf-RNPHF][RRM3_hnRNPH_hnRNPH2_hnRNPF][RRM_6][2 X 19 AA perfect repeats]	[RNA recognition motif 1 in heterogeneous nuclear ribonucleoprotein hnRNP H, hnRNP H2, hnRNP F and similar proteins; cd12729][RNA recognition motif (a.k.a. RRM, RBD, or RNP domain); pfam14259][RNA recognition motif (RRM) superfamily; cl17169][RNA recognition motif (a.k.a. RRM, RBD, or RNP domain); pfam14259][propagated from UniProtKB/Swiss-Prot (P55795.1)][RNPHF zinc finger; pfam08080][RNA recogn…	[1][236][240][246][249][310]	[acetylation][phosphorylation][phosphorylation][phosphorylation][phosphorylation][phosphorylation]	[N-acetylmethionine; propagated from UniProtKB/Swiss-Prot (P55795.1)][][][][][Phosphoserine; propagated from UniProtKB/Swiss-Prot (P55795.1)]
120	1	gi|20070125|ref|NP_000909.2|	gi|20070125|ref|NP_000909.2|	protein disulfide-isomerase precursor [Homo sapiens]	P4HB	7	37	37	7	0	37	17.52	0.00228926	2.12535	8	43	43	8	0	43	19.09	0.00107699	0.224698	2	3	3	2	0	3	5.12	0.00024246	508	57116	4.9	o	18	0.84	S	18	17	5.3.4.1	[24..474][27..129][137..232][244..347][368..470][505..508]	[ER_PDI_fam][PDI_a_family][PDI_b_family][PDI_b'_family][PDI_a_PDI_a'_C][Prevents secretion from ER]	[protein disulfide isomerase, eukaryotic; TIGR01130][Protein Disulfide Isomerase (PDIa) family, redox active TRX domains; composed of eukaryotic proteins involved in oxidative protein folding in the endoplasmic reticulum (ER) by acting as catalysts and folding assistants. Members of this family include PDI...; cd02961][Protein Disulfide Isomerase (PDIb) family, redox inactive TRX-like domain b; c…	[order(53,56)][53][54][55][120][200][222][271][357][order(397,400,461)][397][398][399][461]	[active][modified][other][other][other][acetylation][modified][modified][phosphorylation][active][modified][other][other][other]	[catalytic residues [active]][alkylation site][Contributes to redox potential value; propagated from UniProtKB/Swiss-Prot (P07237.3)][Contributes to redox potential value; propagated from UniProtKB/Swiss-Prot (P07237.3)][Lowers pKa of C-terminal Cys of first active site; propagated from UniProtKB/Swiss-Prot (P07237.3)][N6-acetyllysine. {ECO:0000250|UniProtKB:P09103}; propagated from UniProtKB/Swi…
121	1	gi|8922601|ref|NP_060654.1|	gi|8922601|ref|NP_060654.1|	ADP-ribosylation factor-like protein 8B [Homo sapiens]	ARL8B	4	24	24	4	0	24	26.34	0.00405561	2.11802	7	28	28	7	0	28	44.09	0.00191536	0.345692	3	3	3	3	0	3	13.98	0.00066222	186	21539	8.4	o	18	0.476	Q	36	3		[22..180][23..179]	[Arl10_like][Ras]	[Arf-like 9 (Arl9) and 10 (Arl10) GTPases; cd04159][Ras family; pfam00071]	[1][27..34][order(29..30,34,38,51..58,80,85)][order(30..35,130..131,133..134,163..165)][order(39..42,45..55)][order(52..56,61,71,75,81,83..85)][52][order(53..60,70,81,84..85)][order(56..63,65..70)][71..88][71..74][130..133][163..165]	[acetylation][other][other][other][other][other][other][other][other][other][other][other][other]	[N-acetylmethionine. {ECO:0000244|PubMed:22223895, ECO:0000244|PubMed:22814378, ECO:0000269|PubMed:16537643}; propagated from UniProtKB/Swiss-Prot (Q9NVJ2.1)][G1 box][putative GAP interaction site [polypeptide binding]][GTP/Mg2+ binding site [chemical binding]][Switch I region][putative GEF interaction site [polypeptide binding]][G2 box][putative effector interaction site][interswitch region][Swi…
122	2	gi|379317177|ref|NP_001243839.1|;gi|50659095|ref|NP_004719.2|	gi|379317177|ref|NP_001243839.1|	nucleolar RNA helicase 2 isoform 2 [Homo sapiens]	DDX21	4	6	6	4	0	6	6.29	0.00026376	2.112	3	7	7	3	0	7	7.97	0.00012457	1.84	2	4	4	2	0	4	4.62	0.00022969	715	79657	9.4	o	37	0.01	Q	0	10	3.6.4.13	[100..486][120..327][343..470][549..641][650..>703]	[PTZ00424][DEADc][HELICc][GUCT_RHII_Gualpha_beta][AdoMet_MTases]	[helicase 45; Provisional][DEAD-box helicases. A diverse family of proteins involved in ATP-dependent RNA unwinding, needed in a variety of cellular processes including splicing, ribosome biogenesis and RNA degradation. The name derives from the sequence of the Walker B motif...; cd00268][Helicase superfamily c-terminal domain; associated with DEXDc-, DEAD-, and DEAH-box proteins, yeast initiatio…	[165..169][271..274][307..309][order(378..381,400..401,426..428)][order(434,455,459,462)]	[other][other][other][other][other]	[ATP binding site [chemical binding]][Mg++ binding site [ion binding]][motif III][nucleotide binding region [chemical binding]][ATP-binding site [chemical binding]]
123	1	gi|16905507|ref|NP_473368.1|	gi|16905507|ref|NP_473368.1|	progressive ankylosis protein homolog [Homo sapiens]	ANKH	3	31	31	3	0	31	13.01	0.00198041	2.06897	6	37	37	6	0	37	15.04	0.00095685	0.0867294	1	1	1	1	0	1	2.44	8.345e-05	492	54241	7.9	i86-105o131-153i158-180o190-212i327-346o361-383i404-426o430-452i	24	0.493	Q	27	5		[1..345][327..>438]	[ANKH][MATE_like]	[Progressive ankylosis protein (ANKH); pfam07260][Multidrug and toxic compound extrusion family and similar proteins; cl09326]	[86..106][132..152][159..179][190..210][327..347][351..371][404..426][430..452]	[transmembrane region][transmembrane region][transmembrane region][transmembrane region][transmembrane region][transmembrane region][transmembrane region][transmembrane region]	[propagated from UniProtKB/Swiss-Prot (Q9HCJ1.2)][propagated from UniProtKB/Swiss-Prot (Q9HCJ1.2)][propagated from UniProtKB/Swiss-Prot (Q9HCJ1.2)][propagated from UniProtKB/Swiss-Prot (Q9HCJ1.2)][propagated from UniProtKB/Swiss-Prot (Q9HCJ1.2)][propagated from UniProtKB/Swiss-Prot (Q9HCJ1.2)][propagated from UniProtKB/Swiss-Prot (Q9HCJ1.2)][propagated from UniProtKB/Swiss-Prot (Q9HCJ1.2)]
124	1	gi|4506695|ref|NP_001013.1|	gi|4506695|ref|NP_001013.1|	40S ribosomal protein S19 [Homo sapiens]	RPS19	4	8	8	4	0	8	27.59	0.00173412	1.97719	4	10	10	4	0	10	28.97	0.00087748	0.645382	1	2	2	1	0	2	8.97	0.00056631	145	16060	10.3	o	29	0.073	Q	27	19		[4..139]	[Ribosomal_S19e]	[Ribosomal protein S19e; pfam01090]	[23][111][115][143]	[acetylation][acetylation][acetylation][modified]	[N6-acetyllysine. {ECO:0000244|PubMed:19608861}; propagated from UniProtKB/Swiss-Prot (P39019.2)][N6-acetyllysine. {ECO:0000244|PubMed:19608861}; propagated from UniProtKB/Swiss-Prot (P39019.2)][N6-acetyllysine. {ECO:0000250|UniProtKB:Q9CZX8}; propagated from UniProtKB/Swiss-Prot (P39019.2)][N6-succinyllysine. {ECO:0000250|UniProtKB:Q9CZX8}; propagated from UniProtKB/Swiss-Prot (P39019.2)]
125	2	gi|14141161|ref|NP_004492.2|;gi|74136883|ref|NP_114032.2|	gi|14141161|ref|NP_004492.2|	heterogeneous nuclear ribonucleoprotein U isoform b [Homo sapiens]	HNRNPU	7	16	16	7	0	16	11.29	0.00062394	1.97468	8	21	20	8	1	20	13.52	0.00031572	0.64557	2	4	4	2	0	4	3.35	0.00020376	806	88980	5.8	o	41	0.02	Q	0	1		[8..42][269..444][480..624]	[SAP][SPRY_hnRNP][AAA_33]	[Putative DNA-binding (bihelical) motif predicted to be involved in chromosomal organisation; smart00513][SPRY domain in heterogeneous nuclear ribonucleoprotein U-like (hnRNP) protein 1; cd12884][AAA domain; pfam13671]	[3][4][50][59][100][252][454][714][720]	[phosphorylation][phosphorylation][methylation][phosphorylation][modified][phosphorylation][phosphorylation][methylation][methylation]	[][][][][proteolytic cleavage site][][][][]
126	1	gi|4506901|ref|NP_003008.1|	gi|4506901|ref|NP_003008.1|	serine/arginine-rich splicing factor 3 [Homo sapiens]	SRSF3	4	6	5	3	1	5.625	25.61	0.00107804	1.92844	4	8	6	3	2	7.2	24.39	0.00055859	1.88014	3	5	3	2	2	4.2	18.29	0.00105147	164	19330	11.6	o	6	0.086	Q	0	6		[1..90][6..86][11..78][119..164]	[Sufficiernt for interaction with NXF1][RRM_SF][RRM][2 X approximate repeats, basic]	[propagated from UniProtKB/Swiss-Prot (P84103.1)][RNA recognition motif (RRM) superfamily; cl17169][RNA recognition motif; smart00360][propagated from UniProtKB/Swiss-Prot (P84103.1)]	[1][5][23][81][128][130][138][140][148][150][152]	[acetylation][phosphorylation][acetylation][phosphorylation][phosphorylation][phosphorylation][phosphorylation][phosphorylation][phosphorylation][phosphorylation][phosphorylation]	[N-acetylmethionine. {ECO:0000269|PubMed:20068231}; propagated from UniProtKB/Swiss-Prot (P84103.1)][Phosphoserine. {ECO:0000269|PubMed:20068231}; propagated from UniProtKB/Swiss-Prot (P84103.1)][N6-acetyllysine. {ECO:0000269|PubMed:19608861}; propagated from UniProtKB/Swiss-Prot (P84103.1)][][][][][][][][]
127	1	gi|68342038|ref|NP_001020280.1|	gi|68342038|ref|NP_001020280.1|	hematopoietic progenitor cell antigen CD34 isoform a precursor [Homo sapiens]	CD34	1	7	7	1	0	7	7.53	0.00057147	1.92256	1	9	9	1	0	9	7.53	0.00029743	0.360269	1	1	1	1	0	1	7.53	0.00010664	385	40716	7.4	o291-313i	33	0.71	S	33	1		[190..385]	[CD34_antigen]	[CD34/Podocalyxin family; pfam06365]	[291..311]	[transmembrane region]	[propagated from UniProtKB/Swiss-Prot (P28906.2)]
128	1	gi|4758250|ref|NP_004084.1|	gi|4758250|ref|NP_004084.1|	ephrin-B2 precursor [Homo sapiens]	EFNB2	2	4	3	1	1	3.75	12.61	0.00035395	1.8534	2	5	5	2	0	5	8.11	0.00019104	2.58115	2	4	4	2	0	4	8.11	0.00049318	333	36923	8.9	o228-250i	26	0.607	S	26	13		[29..165][331..333]	[Ephrin-B_Ectodomain][PDZ-binding. {ECO:0000255}]	[Ectodomain of Ephrin B; cd10426][propagated from UniProtKB/Swiss-Prot (P52799.1)]	[order(57,96..98,103,106..107,109..111,113,115,117..123,][230..250][260][274][304][330]	[other][transmembrane region][phosphorylation][phosphorylation][phosphorylation][phosphorylation]	[receptor binding site [polypeptide binding]][propagated from UniProtKB/Swiss-Prot (P52799.1)][Phosphoserine. {ECO:0000250|UniProtKB:P52800}; propagated from UniProtKB/Swiss-Prot (P52799.1)][Phosphothreonine. {ECO:0000250|UniProtKB:P52800}; propagated from UniProtKB/Swiss-Prot (P52799.1)][][]
129	1	gi|6678271|ref|NP_031401.1|	gi|6678271|ref|NP_031401.1|	TAR DNA-binding protein 43 [Homo sapiens]	TARDBP	2	5	5	2	0	5	7.25	0.0003796	1.76744	4	7	7	4	0	7	15.7	0.00021513	0.460465	1	1	1	1	0	1	2.9	9.917e-05	414	44740	6.2	o	41	0.072	Q	0	1		[105..181][106..175][191..261][193..252]	[RRM1_TDP43][RRM][RRM2_TDP43][RRM_6]	[RNA recognition motif 1 in TAR DNA-binding protein 43 (TDP-43) and similar proteins; cd12321][RNA recognition motif; smart00360][RNA recognition motif 2 in TAR DNA-binding protein 43 (TDP-43) and similar proteins; cd12322][RNA recognition motif (a.k.a. RRM, RBD, or RNP domain); pfam14259]	[91][92][157][order(192,194,196..197,221,227,229,231,258..261)][292]	[phosphorylation][phosphorylation][phosphorylation][DNA binding][phosphorylation]	[][][][DNA binding site [nucleotide binding]][Phosphoserine; propagated from UniProtKB/Swiss-Prot (Q13148.1)]
130	1	gi|306482694|ref|NP_001182375.1|	gi|306482694|ref|NP_001182375.1|	serine/arginine-rich splicing factor 7 isoform 2 [Homo sapiens]	SRSF7	2	4	3	1	1	3.375	13.72	0.00046938	1.73704	2	6	4	1	2	4.8	13.72	0.00027023	1.88519	2	4	2	1	2	2.8	10.18	0.00050868	226	26012	11.8						2		[12..88][12..79]	[RRM_SRSF7][RRM]	[RNA recognition motif in vertebrate serine/arginine-rich splicing factor 7 (SRSF7); cd12646][RNA recognition motif; smart00360]	[order(41,43..45,49,51,82,84)]	[other]	[putative RNA binding site [nucleotide binding]]
131	1	gi|148470406|ref|NP_001091676.1|	gi|148470406|ref|NP_001091676.1|	heterogeneous nuclear ribonucleoprotein F [Homo sapiens]	HNRNPF	4	10	5	2	5	8.14286	14.46	0.00061672	1.73315	3	12	3	1	9	11.6	10.6	0.00035564	0.55618	1	4	0	0	4	2	4.1	0.00019787	415	45672	5.6	o	24	0.135	Q	24	10		[10..88][13..84][81..86][93..188][113..182][179..184][255..290][289..363][291..358][355..360]	[RRM1_hnRNPH_hnRNPH2_hnRNPF][RRM_6][Interaction with RNA][RRM_SF][RRM_6][Interaction with RNA][zf-RNPHF][RRM3_hnRNPH_CRSF1_like][RRM_6][Interaction with RNA]	[RNA recognition motif 1 in heterogeneous nuclear ribonucleoprotein hnRNP H, hnRNP H2, hnRNP F and similar proteins; cd12729][RNA recognition motif (a.k.a. RRM, RBD, or RNP domain); pfam14259][propagated from UniProtKB/Swiss-Prot (P52597.3)][RNA recognition motif (RRM) superfamily; cl17169][RNA recognition motif (a.k.a. RRM, RBD, or RNP domain); pfam14259][propagated from UniProtKB/Swiss-Prot (P5…	[1][2][16][20][52][75][104][116][120][150][161][161][173][187][224][246][294][298][310][326][349]	[acetylation][acetylation][other][other][other][other][phosphorylation][other][other][other][phosphorylation][phosphorylation][other][phosphorylation][acetylation][phosphorylation][other][other][phosphorylation][other][other]	[N-acetylmethionine, in Heterogeneous nuclear ribonucleoprotein F, alternate; propagated from UniProtKB/Swiss-Prot (P52597.3)][N-acetylmethionine, in Heterogeneous nuclear ribonucleoprotein F, N-terminally processed; propagated from UniProtKB/Swiss-Prot (P52597.3)][Interaction with RNA; propagated from UniProtKB/Swiss-Prot (P52597.3)][Interaction with RNA; propagated from UniProtKB/Swiss-Prot (P5…
132	2	gi|188595716|ref|NP_001120972.1|;gi|42741655|ref|NP_000236.2|	gi|188595716|ref|NP_001120972.1|	hepatocyte growth factor receptor isoform a precursor [Homo sapiens]	MET	1	2	2	1	0	2	0.92	4.465e-05	1.66667	2	3	3	2	0	3	2.13	2.711e-05	1.07407	1	1	1	1	0	1	0.78	2.916e-05	1408	157711	7.3						7	2.7.10.1	[25..516][519..562][563..656][657..740][742..855][857..950][1096..1355][1100..1361]	[Sema_MET][PSI][IPT_plexin_repeat1][IPT_plexin_repeat2][IPT][IPT_PCSR][Pkinase_Tyr][PTKc_Met_Ron]	[The Sema domain, a protein interacting module, of MET (also called hepatocyte growth factor receptor, HGFR); cd11278][Plexin repeat; pfam01437][First repeat of the IPT domain of Plexins and Cell Surface Receptors (PCSR) . Plexins are involved in the regulation of cell proliferation and of cellular adhesion and repulsion receptors. In general, there are three copies of the IPT domain present...; …	[order(124..127,148,190..192,218,220..223,229..230,286)][order(301,331..334,369,376,426..427,431,469..470)][order(1102..1105,1110,1126,1128,1158,1175..1178,][order(1102..1105,1110,1126,1128,1158,1175..1178,][order(1222,1226,1260..1264,1273,1307)][order(1239..1258,1260..1266)]	[other][other][active][other][other][other]	[HGF binding site [polypeptide binding]][InlB binding site [polypeptide binding]][][ATP binding site [chemical binding]][polypeptide substrate binding site [polypeptide binding]][activation loop (A-loop)]
133	2	gi|14141152|ref|NP_005959.2|;gi|157412270|ref|NP_112480.2|	gi|14141152|ref|NP_005959.2|	heterogeneous nuclear ribonucleoprotein M isoform a [Homo sapiens]	HNRNPM	5	10	10	5	0	10	8.49	0.00043056	1.65134	5	15	15	5	0	15	8.9	0.00026144	0.429119	1	2	2	1	0	2	1.51	0.00011249	730	77516	8.7	o	3	0.088	Q	14	19		[41..70][72..147][74..144][205..276][206..279][400..608][654..730][655..724]	[HnRNP_M][RRM1_hnRNPM][RRM][RRM][RRM2_hnRNPM_like][27 X 6 AA repeats of [GEVSTPAN]-[ILMV]-[DE]-[RH]-[MLVI]-[GAV]][RRM3_hnRNPM][RRM]	[Heterogeneous nuclear ribonucleoprotein M; pfam11532][RNA recognition motif 1 in vertebrate heterogeneous nuclear ribonucleoprotein M (hnRNP M); cd12657][RNA recognition motif; smart00360][RNA recognition motif; smart00360][RNA recognition motif 2 in heterogeneous nuclear ribonucleoprotein M (hnRNP M) and similar proteins; cd12386][propagated from UniProtKB/Swiss-Prot (P52272.3)][RNA recognition…	[2][29][277][432][452][468][481][528][575][588][618][618][633][637][698][701]	[acetylation][phosphorylation][acetylation][phosphorylation][phosphorylation][phosphorylation][phosphorylation][phosphorylation][phosphorylation][phosphorylation][phosphorylation][phosphorylation][phosphorylation][phosphorylation][acetylation][phosphorylation]	[N-acetylalanine; propagated from UniProtKB/Swiss-Prot (P52272.3)][Phosphoserine; propagated from UniProtKB/Swiss-Prot (P52272.3)][N6-acetyllysine; propagated from UniProtKB/Swiss-Prot (P52272.3)][Phosphoserine; propagated from UniProtKB/Swiss-Prot (P52272.3)][Phosphoserine; propagated from UniProtKB/Swiss-Prot (P52272.3)][Phosphoserine; propagated from UniProtKB/Swiss-Prot (P52272.3)][Phosphoser…
134	1	gi|116805322|ref|NP_001449.3|	gi|116805322|ref|NP_001449.3|	filamin-C isoform a [Homo sapiens]	FLNC	27	59	55	24	4	56.522	16.37	0.00065194	1.65063	27	93	81	25	12	84.4973	16.73	0.00039453	0.151899	2	4	4	2	0	4	1.36	6.027e-05	2725	291020	6	o	3	0.1	Q	16	7		[1..268][37..141][161..257][270..368][275..371][370..468][375..471][469..565][474..567][566..658][572..661][662..758][667..761][759..861][764..864][862..960][867..963][961..1056][967..1060][1057..1149][1062..1151][1150..1244][1155..1247][1245..1344][1251..1347][1345..1437][1350..1439][1438..1533][1443..1536][1534..1630][1539..1633][1636..1732][1734..1766][<1795..1855][1854..1946][1862..1948][1947…	[actin-binding domain][CH][CH][Filamin 1][IG_FLMN][Filamin 2][IG_FLMN][Filamin 3][IG_FLMN][Filamin 4][IG_FLMN][Filamin 5][IG_FLMN][Filamin 6][IG_FLMN][Filamin 7][IG_FLMN][Filamin 8][IG_FLMN][Filamin 9][IG_FLMN][Filamin 10][IG_FLMN][Filamin 11][IG_FLMN][Filamin 12][IG_FLMN][Filamin 13][IG_FLMN][Filamin 14][IG_FLMN][IG_FLMN][Hinge I][IG_FLMN][Filamin 17][IG_FLMN][Filamin 18][Filamin 19][IG_FLMN][In…	[][Calponin homology domain; actin-binding domain which may be present as a single copy or in tandem repeats (which increases binding affinity). The CH domain is found in cytoskeletal and signal transduction proteins, including actin-binding proteins like...; cd00014][Calponin homology domain; actin-binding domain which may be present as a single copy or in tandem repeats (which increases binding…	[order(37..38,40..42,45,48,104..105,108,111,113,128..129,][order(161,163..165,168,171,222..223,226,230,232,248..249,][1161][1338][2233][2236][2683]	[other][other][phosphorylation][phosphorylation][phosphorylation][phosphorylation][phosphorylation]	[putative actin binding surface [polypeptide binding]][putative actin binding surface [polypeptide binding]][Phosphoserine. {ECO:0000244|PubMed:18088087}; propagated from UniProtKB/Swiss-Prot (Q14315.3)][Phosphoserine. {ECO:0000244|PubMed:24275569}; propagated from UniProtKB/Swiss-Prot (Q14315.3)][Phosphoserine. {ECO:0000244|PubMed:19369195, ECO:0000244|PubMed:21406692, ECO:0000244|PubMed:2427556…
135	1	gi|31621303|ref|NP_112233.2|	gi|31621303|ref|NP_112233.2|	sideroflexin-3 [Homo sapiens]	SFXN3	1	2	2	1	0	2	4.31	0.00019342	1.64957	2	3	3	2	0	3	7.38	0.00011745	4.31624	1	4	4	1	0	4	4.31	0.00050532	325	35979	9.1	o268-290i	38	0.053	Q	0	10		[19..325]	[Mtc]	[Tricarboxylate carrier; pfam03820]	[150..168][178..198][230..250][270..290]	[transmembrane region][transmembrane region][transmembrane region][transmembrane region]	[propagated from UniProtKB/Swiss-Prot (Q9BWM7.2)][propagated from UniProtKB/Swiss-Prot (Q9BWM7.2)][propagated from UniProtKB/Swiss-Prot (Q9BWM7.2)][propagated from UniProtKB/Swiss-Prot (Q9BWM7.2)]
136	3	gi|115529482|ref|NP_851996.2|;gi|336285440|ref|NP_001229536.1|;gi|94420689|ref|NP_000606.3|	gi|115529482|ref|NP_851996.2|	neural cell adhesion molecule 1 isoform 2 precursor [Homo sapiens]	NCAM1	8	18	18	8	0	18	11.54	0.00065939	1.6475	8	27	27	8	0	27	11.42	0.00040039	0.36	1	3	3	1	0	3	1.28	0.00014356	858	94574	4.9	o724-746i	20	0.808	S	20	11	2.7.11.1	[20..115][21..112][131..192][135..190][211..307][222..304][306..412][323..402][421..499][432..502][508..605][626..702]	[Ig1_NCAM-1][I-set][IGc2][Ig][Ig][IG_like][Ig5_NCAM-1][IGc2][IG_like][Ig][FN3][FN3]	[First immunoglobulin (Ig)-like domain of neural cell adhesion molecule NCAM-1; cd05865][Immunoglobulin I-set domain; pfam07679][Immunoglobulin C-2 Type; smart00408][Immunoglobulin domain; cd00096][Immunoglobulin domain; cl11960][Immunoglobulin like; smart00410][Fifth immunoglobulin (Ig)-like domain of Neural Cell Adhesion Molecule NCAM-1 (NCAM); cd05869][Immunoglobulin C-2 Type; smart00408][Immu…	[order(35,37..38)][459][488][order(578,593)][order(594..595,597..598)][order(676,691)][order(692..693,695..696)][719..739]	[other][glycosylation][glycosylation][other][other][other][other][transmembrane region]	[dimer interface [polypeptide binding]][][][Interdomain contacts][Cytokine receptor motif][Interdomain contacts][Cytokine receptor motif][propagated from UniProtKB/Swiss-Prot (P13591.3)]
137	1	gi|523425718|ref|NP_001265597.1|	gi|523425718|ref|NP_001265597.1|	ras-related protein Rab-23 [Homo sapiens]	RAB23	1	2	2	1	0	2	4.64	0.00026524	1.64596	1	3	3	1	0	3	7.17	0.00016106	2.14907	1	2	2	1	0	2	7.17	0.00034648	237	26659	6.6	o	33	0.045	Q	22	6		[10..169][11..171]	[Rab23_like][Ras]	[Rab GTPase family 23 (Rab23)-like; cd04106][Ras family; pfam00071]	[10..11][16..23][order(19..24,37..38,40,121..122,124,152..153)][order(24..35,39..40)][order(34,39..47)][order(39,43..50,57,59)][41][order(42,44..46,61,63,70..71,74,78,80..83,169)][order(42..43,45,63..64,71,73,75..77)][42..46][59..63][64..67][order(67,69..79)][70..75][78..82][87..92][114..118][121..124][151..153][167..169]	[other][other][other][other][other][other][other][other][other][other][other][other][other][other][other][other][other][other][other][other]	[Rab subfamily motif 1 (RabSF1)][G1 box][GTP/Mg2+ binding site [chemical binding]][Rab subfamily motif 2 (RabSF2)][Switch I region][putative GEF interaction site [polypeptide binding]][G2 box][putative effector interaction site][putative GDI interaction site [polypeptide binding]][Rab family motif 1 (RabF1)][Rab family motif 2 (RabF2)][G3 box][Switch II region][Rab family motif 3 (RabF3)][Rab fam…
138	3	gi|18201909|ref|NP_542413.1|;gi|315434271|ref|NP_001186763.1|;gi|4507875|ref|NP_001069.1|	gi|18201909|ref|NP_542413.1|	vascular cell adhesion protein 1 isoform b precursor [Homo sapiens]	VCAM1	1	6	6	1	0	6	2.32	0.00029148	1.64407	1	9	9	1	0	9	2.32	0.00017699	1.43503	1	4	4	1	0	4	2.32	0.00025383	647	71255	5.2	o607-629i	25	0.79	S	25	1		[33..112][43..109][116..214][238..298][242..305][312..410][427..504][438..501][512..593][517..593]	[IG_like][Ig][Ig2_VCAM-1][IGc2][Ig][Ig2_VCAM-1][IG_like][Ig][Ig][IG_like]	[Immunoglobulin like; smart00410][Immunoglobulin domain; cd00096][Second immunoglobulin (Ig)-like domain of vascular endothelial cell adhesion molecule-1 (VCAM-1, CD106) and intercellular cell adhesion molecule-1 (ICAM-1, CD54) and similar proteins; cd07689][Immunoglobulin C-2 Type; smart00408][Immunoglobulin domain; cd00096][Second immunoglobulin (Ig)-like domain of vascular endothelial cell adh…
139	2	gi|21389315|ref|NP_005975.1|;gi|374717343|ref|NP_001243463.1|	gi|21389315|ref|NP_005975.1|	tricarboxylate transport protein, mitochondrial isoform a precursor [Homo sapiens]	SLC25A1	1	2	2	1	0	2	3.86	0.00020213	1.64228	1	3	3	1	0	3	3.86	0.00012273	2.14634	2	2	2	2	0	2	7.72	0.00026403	311	34013	9.9	o	6	0.35	S	44	22		[23..111][24..114][30..304][122..208][<141..213][216..306][218..303]	[Solcar 1][Mito_carr][PTZ00169][Solcar 2][Mito_carr][Mito_carr][Solcar 3]	[propagated from UniProtKB/Swiss-Prot (P53007.2)][Mitochondrial carrier protein; pfam00153][ADP/ATP transporter on adenylate translocase; Provisional][propagated from UniProtKB/Swiss-Prot (P53007.2)][Mitochondrial carrier protein; pfam00153][Mitochondrial carrier protein; pfam00153][propagated from UniProtKB/Swiss-Prot (P53007.2)]	[29..46][86..105][129..143][183..202][224..241][278..297]	[transmembrane region][transmembrane region][transmembrane region][transmembrane region][transmembrane region][transmembrane region]	[propagated from UniProtKB/Swiss-Prot (P53007.2)][propagated from UniProtKB/Swiss-Prot (P53007.2)][propagated from UniProtKB/Swiss-Prot (P53007.2)][propagated from UniProtKB/Swiss-Prot (P53007.2)][propagated from UniProtKB/Swiss-Prot (P53007.2)][propagated from UniProtKB/Swiss-Prot (P53007.2)]
140	1	gi|21361732|ref|NP_060790.2|	gi|21361732|ref|NP_060790.2|	RING finger protein 121 [Homo sapiens]	RNF121	1	2	2	1	0	2	5.2	0.00019224	1.64103	1	3	3	1	0	3	5.2	0.00011673	3.22222	1	3	3	1	0	3	5.2	0.00037667	327	37882	7.1	o50-72i79-96o101-120i140-162o175-192i302-324o	66	0.112	Q	16	11		[226..279]	[RING]	[RING-finger (Really Interesting New Gene) domain, a specialized type of Zn-finger of 40 to 60 residues that binds two atoms of zinc; defined by the 'cross-brace' motif C-X2-C-X(9-39)-C-X(1-3)- H-X(2-3)-(N/C/H)-X2-C-X(4-48)C-X2-C; probably involved in...; cd00162]	[2][50..70][79..99][100..120][148..168][172..192][order(226,229,251,253,256,259,272,275)][306..326]	[acetylation][transmembrane region][transmembrane region][transmembrane region][transmembrane region][transmembrane region][other][transmembrane region]	[N-acetylalanine; propagated from UniProtKB/Swiss-Prot (Q9H920.1)][propagated from UniProtKB/Swiss-Prot (Q9H920.1)][propagated from UniProtKB/Swiss-Prot (Q9H920.1)][propagated from UniProtKB/Swiss-Prot (Q9H920.1)][propagated from UniProtKB/Swiss-Prot (Q9H920.1)][propagated from UniProtKB/Swiss-Prot (Q9H920.1)][cross-brace motif][propagated from UniProtKB/Swiss-Prot (Q9H920.1)]
141	3	gi|215599015|ref|NP_001135935.1|;gi|4503337|ref|NP_001354.1|;gi|570700851|ref|NP_001275676.1|	gi|215599015|ref|NP_001135935.1|	H/ACA ribonucleoprotein complex subunit 4 isoform 2 [Homo sapiens]	DKC1	1	2	2	1	0	2	2.75	0.0001235	1.64	2	3	3	2	0	3	5.3	7.499e-05	1.08	1	1	1	1	0	1	2.75	8.066e-05	509	57033	9.5						X		[2..21][48..106][56..381][88..270][297..370][441..509]	[Nucleolar localization][DKCLD][CBF5][PseudoU_synth_hDyskerin][PUA][Nuclear and nucleolar localization]	[propagated from UniProtKB/Swiss-Prot (O60832.3)][DKCLD (NUC011) domain; pfam08068][rRNA pseudouridine synthase, putative; TIGR00425][Pseudouridine synthase, human dyskerin like; cd02572][PUA domain; pfam01472][propagated from UniProtKB/Swiss-Prot (O60832.3)]	[2][21][order(122..125,227)][446][448][450][453][480][489][508]	[acetylation][phosphorylation][active][phosphorylation][phosphorylation][phosphorylation][phosphorylation][phosphorylation][phosphorylation][phosphorylation]	[N-acetylalanine. {ECO:0000244|PubMed:19413330, ECO:0000244|PubMed:22223895, ECO:0000269|Ref.8}; propagated from UniProtKB/Swiss-Prot (O60832.3)][Phosphoserine. {ECO:0000244|PubMed:17081983, ECO:0000244|PubMed:18669648, ECO:0000244|PubMed:18691976, ECO:0000244|PubMed:19690332, ECO:0000244|PubMed:20068231, ECO:0000244|PubMed:21406692}; propagated from UniProtKB/Swiss-Prot (O60832.3)][probable acti…
142	1	gi|255652944|ref|NP_000262.2|	gi|255652944|ref|NP_000262.2|	Niemann-Pick C1 protein precursor [Homo sapiens]	NPC1	1	2	2	1	0	2	1.02	4.919e-05	1.63333	1	3	3	1	0	3	1.02	2.987e-05	3.2	1	3	3	1	0	3	1.02	9.638e-05	1278	142166	5.4						18		[25..1252][175..205][649..802][1275..1278]	[2A060601][Important for cholesterol binding and cholesterol transfer from NPC1 to liposomes][Sterol-sensing][Di-leucine motif]	[Niemann-Pick C type protein family; TIGR00917][propagated from UniProtKB/Swiss-Prot (O15118.2)][Sterol-sensing domain of SREBP cleavage-activation; pfam12349][propagated from UniProtKB/Swiss-Prot (O15118.2)]	[108][270..290][351..371][621..641][655..675][678..698][735..755][760..780][833..853][1099..1119][1125..1145][1147..1167][1196..1216][1228..1248]	[other][transmembrane region][transmembrane region][transmembrane region][transmembrane region][transmembrane region][transmembrane region][transmembrane region][transmembrane region][transmembrane region][transmembrane region][transmembrane region][transmembrane region][transmembrane region]	[Important for cholesterol binding; propagated from UniProtKB/Swiss-Prot (O15118.2)][propagated from UniProtKB/Swiss-Prot (O15118.2)][propagated from UniProtKB/Swiss-Prot (O15118.2)][propagated from UniProtKB/Swiss-Prot (O15118.2)][propagated from UniProtKB/Swiss-Prot (O15118.2)][propagated from UniProtKB/Swiss-Prot (O15118.2)][propagated from UniProtKB/Swiss-Prot (O15118.2)][propagated from UniP…
143	1	gi|40254462|ref|NP_002063.2|	gi|40254462|ref|NP_002063.2|	guanine nucleotide-binding protein G(q) subunit alpha [Homo sapiens]	GNAQ	6	20	13	3	7	17.55	24.51	0.00153653	1.54472	7	39	20	3	19	28.0851	28.41	0.00099538	0.114573	1	1	1	1	0	1	5.29	0.00011437	359	42142	5.7	o	19	0.053	Q	19	9		[19..357][40..353]	[G_alpha][G-alpha]	[G protein alpha subunit; smart00275][Alpha subunit of G proteins (guanine nucleotide binding); cd00066]	[9][10][order(46,51..53,186,205,208,274..275,277,330..331)][46..53][order(47..49,77,81,85,88,91..92,110,113,154,183,208,216,][181..189][183][186][order(187,189,191,202,204,208..210,212,215..216,218..221)][order(189,214,217..218,221)][205..208][206..222][209][274..277][order(322..333,335..338)][330..332]	[modified][modified][other][other][other][other][modified][other][other][other][other][other][amidation][other][other][other]	[palmitoylation site][palmitoylation site][GTP/Mg2+ binding site [chemical binding]][G1 box][GoLoco binding site][Switch I region][ADP-ribosylarginine, by cholera toxin. {ECO:0000250}; propagated from UniProtKB/Swiss-Prot (P50148.4)][G2 box][beta - gamma complex interaction site [polypeptide binding]][adenylyl cyclase interaction site [polypeptide binding]][G3 box][Switch II region][Deamidated gl…
144	1	gi|162461738|ref|NP_620073.2|	gi|162461738|ref|NP_620073.2|	guanine nucleotide-binding protein G(o) subunit alpha isoform b [Homo sapiens]	GNAO1	5	14	13	4	1	13.1857	16.38	0.00117073	1.51881	5	24	21	4	3	21.4406	16.38	0.00077062	0.188067	2	2	1	1	1	1.25	6.21	0.00014498	354	40087	5.9	o	32	0.023	Q	19	16		[14..352][34..348]	[G_alpha][G-alpha]	[G protein alpha subunit; smart00275][Alpha subunit of G proteins (guanine nucleotide binding); cd00066]	[order(40,45..47,182,201,204,270..271,273,325..326)][40..47][order(41..43,71,75,79,82,85..86,104,107,150,179,204,212,][177..185][182][order(183,185,187,198,200,204..206,208,211..212,214..217)][order(185,210,213..214,217)][201..204][202..218][270..273][order(317..328,330..333)][325..327]	[other][other][other][other][other][other][other][other][other][other][other][other]	[GTP/Mg2+ binding site [chemical binding]][G1 box][GoLoco binding site][Switch I region][G2 box][beta - gamma complex interaction site [polypeptide binding]][adenylyl cyclase interaction site [polypeptide binding]][G3 box][Switch II region][G4 box][putative receptor binding site][G5 box]
145	1	gi|15718761|ref|NP_004976.2|	gi|15718761|ref|NP_004976.2|	GTPase KRas isoform b precursor [Homo sapiens]	KRAS	5	16	3	2	13	12	40.96	0.00200623	1.49701	4	31	1	1	30	19.8	34.57	0.00134002	0.0813433	1	1	0	0	1	0.5	7.98	0.0001092	188	21425	8.1	o	19	0.119	Q	19	12		[3..164][16..165]	[H_N_K_Ras_like][Ras]	[Ras GTPase family containing H-Ras,N-Ras and K-Ras4A/4B; cd04138][Ras family; pfam00071]	[10..17][order(11..12,59..60)][order(12..18,28..30,32,35,60,116..117,119..120,145..146)][order(17..18,30..32,34,37,40..41,54..55,57,59..61,63..65,][order(25,37..41)][33..40][35][57..60][59..77][116..119][145..147]	[other][other][other][other][other][other][other][other][other][other][other]	[G1 box][putative GDI interaction site [polypeptide binding]][GTP/Mg2+ binding site [chemical binding]][GEF interaction site [polypeptide binding]][effector interaction site][Switch I region][G2 box][G3 box][Switch II region][G4 box][G5 box]
146	1	gi|4758668|ref|NP_004854.1|	gi|4758668|ref|NP_004854.1|	serine palmitoyltransferase 2 [Homo sapiens]	SPTLC2	1	3	3	1	0	3	3.38	0.00016778	1.48673	2	5	5	2	0	5	6.05	0.0001132	1.29204	1	2	2	1	0	2	3.38	0.00014611	562	62924	7.8	o	17	0.217	Q	44	14	2.3.1.50	[117..532][168..532]	[BioF][KBL_like]	[7-keto-8-aminopelargonate synthetase or related enzyme [Coenzyme transport and metabolism]; COG0156][KBL_like; this family belongs to the pyridoxal phosphate (PLP)-dependent aspartate aminotransferase superfamily (fold I). The major groups in this CD corresponds to serine palmitoyltransferase (SPT), 5-aminolevulinate synthase (ALAS); cd06454]	[67..87][order(176,237..239,263,315,319..320,344,346..347,376,379,][order(237..239,263,315,319,344,346..347,376,379)][379][379][384][387]	[transmembrane region][other][other][active][modified][phosphorylation][phosphorylation]	[propagated from UniProtKB/Swiss-Prot (O15270.1)][substrate-cofactor binding pocket][pyridoxal 5'-phosphate binding site [chemical binding]][catalytic residue [active]][N6-(pyridoxal phosphate)lysine. {ECO:0000250}; propagated from UniProtKB/Swiss-Prot (O15270.1)][][]
147	1	gi|5032093|ref|NP_005619.1|	gi|5032093|ref|NP_005619.1|	neutral amino acid transporter B(0) isoform 1 [Homo sapiens]	SLC1A5	1	3	3	1	0	3	2.4	0.00017429	1.47458	1	5	5	1	0	5	2.4	0.00011759	1.9322	2	3	3	2	0	3	4.25	0.00022768	541	56598	5.5	i53-75o95-117i130-152o228-245i265-287o302-324i337-359o379-401i414-436o	70	0.165	A	36	19		[106..485]	[SDF]	[Sodium:dicarboxylate symporter family; pfam00375]	[1][53..73][99..119][133..153][225..245][266..286][306..326][336..356][377..397][399..419][426..446][493][503][535][535]	[acetylation][transmembrane region][transmembrane region][transmembrane region][transmembrane region][transmembrane region][transmembrane region][transmembrane region][transmembrane region][transmembrane region][transmembrane region][phosphorylation][phosphorylation][phosphorylation][phosphorylation]	[N-acetylmethionine. {ECO:0000244|PubMed:19413330, ECO:0000244|PubMed:22814378}; propagated from UniProtKB/Swiss-Prot (Q15758.2)][propagated from UniProtKB/Swiss-Prot (Q15758.2)][propagated from UniProtKB/Swiss-Prot (Q15758.2)][propagated from UniProtKB/Swiss-Prot (Q15758.2)][propagated from UniProtKB/Swiss-Prot (Q15758.2)][propagated from UniProtKB/Swiss-Prot (Q15758.2)][propagated from UniProtK…
148	1	gi|110835708|ref|NP_008864.3|	gi|110835708|ref|NP_008864.3|	sodium/myo-inositol cotransporter [Homo sapiens]		2	3	3	2	0	3	3.06	0.00013133	1.47191	3	5	5	3	0	5	5.01	8.86e-05	2.57303	1	4	4	1	0	4	1.25	0.00022873	718	79694	7.3	o10-29i36-58o80-102i122-144o159-181i188-210o259-276i297-319o365-387i408-430o440-462i469-491o511-533i696-715o	25	0.568	A	25
149	1	gi|20357599|ref|NP_619541.1|	gi|20357599|ref|NP_619541.1|	histone H2A.V isoform 2 [Homo sapiens]	H2AFV	1	3	3	1	0	3	8.77	0.00082713	1.45855	2	11	4	1	7	5.07692	16.67	0.00056663	1.63316	2	4	2	1	2	2.57143	16.67	0.00092611	114	12146	10.5	o	65	0.02	Q	65	7		[8..108]	[H2A]	[Histone 2A; H2A is a subunit of the nucleosome. The nucleosome is an octamer containing two H2A, H2B, H3, and H4 subunits. The H2A subunit performs essential roles in maintaining structural integrity of the nucleosome, chromatin condensation, and binding...; cd00074]	[5][order(8,12)][8][12][order(32,35,38..39,46,78,81)][order(41..43,45)][order(55,58..59,62..63,66..67)]	[acetylation][acetylation][acetylation][acetylation][DNA binding][other][other]	[N6-acetyllysine. {ECO:0000250|UniProtKB:Q3THW5}; propagated from UniProtKB/Swiss-Prot (Q71UI9.3)][acetylation sites [posttranslational modification]][N6-acetyllysine. {ECO:0000250|UniProtKB:Q3THW5}; propagated from UniProtKB/Swiss-Prot (Q71UI9.3)][N6-acetyllysine. {ECO:0000250|UniProtKB:Q3THW5}; propagated from UniProtKB/Swiss-Prot (Q71UI9.3)][DNA binding site [nucleotide binding]][homodimerizat…
150	1	gi|222352151|ref|NP_006187.2|	gi|222352151|ref|NP_006187.2|	poly(rC)-binding protein 1 [Homo sapiens]	PCBP1	4	11	5	3	6	9.28571	20.22	0.00081983	1.4386	6	18	13	5	5	15.9545	34.55	0.00057022	0.405263	2	2	2	2	0	2	8.15	0.00023066	356	37498	7.1	o	28	0.107	Q	23	2		[15..76][99..163][281..343]	[PCBP_like_KH][PCBP_like_KH][KH-I]	[K homology RNA-binding domain, PCBP_like. Members of this group possess KH domains in a tandem arrangement. Most members, similar to the poly(C) binding proteins (PCBPs) and Nova, containing three KH domains, with the first and second domains, which are...; cd02396][K homology RNA-binding domain, PCBP_like. Members of this group possess KH domains in a tandem arrangement. Most members, similar t…	[1][order(23,25..27,29..33,36..37,40..41,44..47)][30..33][order(107,109..111,113..117,120..121,124..125,128..131)][114..117][173][190][order(289,291..293,295..299,302..303,306..307,312..315)][296..299]	[acetylation][other][other][other][other][phosphorylation][phosphorylation][other][other]	[N-acetylmethionine; propagated from UniProtKB/Swiss-Prot (Q15365.2)][nucleic acid binding region [nucleotide binding]][G-X-X-G motif][nucleic acid binding region [nucleotide binding]][G-X-X-G motif][Phosphoserine; propagated from UniProtKB/Swiss-Prot (Q15365.2)][Phosphoserine; propagated from UniProtKB/Swiss-Prot (Q15365.2)][nucleic acid binding region [nucleotide binding]][G-X-X-G motif]
151	2	gi|21361114|ref|NP_003553.2|;gi|259155315|ref|NP_001158889.1|	gi|21361114|ref|NP_003553.2|	mitochondrial 2-oxoglutarate/malate carrier protein isoform 1 [Homo sapiens]	SLC25A11	2	4	4	2	0	4	8.6	0.00040039	1.40845	2	7	7	2	0	7	9.55	0.00028364	1.84155	2	4	4	2	0	4	9.55	0.00052302	314	34062	9.9	o	36	0.177	Q	42	17		[23..108][25..306][25..102][116..213][117..208][216..309][217..306]	[Solcar 1][PTZ00169][Mito_carr][Mito_carr][Solcar 2][Mito_carr][Solcar 3]	[propagated from UniProtKB/Swiss-Prot (Q02978.3)][ADP/ATP transporter on adenylate translocase; Provisional][Mitochondrial carrier protein; pfam00153][Mitochondrial carrier protein; pfam00153][propagated from UniProtKB/Swiss-Prot (Q02978.3)][Mitochondrial carrier protein; pfam00153][propagated from UniProtKB/Swiss-Prot (Q02978.3)]	[2][24..42][57][73][83..101][102][119..140][183..202][222..240][256][281..300]	[acetylation][transmembrane region][modified][acetylation][transmembrane region][phosphorylation][transmembrane region][transmembrane region][transmembrane region][acetylation][transmembrane region]	[N-acetylalanine. {ECO:0000244|PubMed:19413330, ECO:0000244|PubMed:22223895, ECO:0000244|PubMed:22814378, ECO:0000244|PubMed:25944712, ECO:0000269|Ref.5}; propagated from UniProtKB/Swiss-Prot (Q02978.3)][propagated from UniProtKB/Swiss-Prot (Q02978.3)][N6-succinyllysine. {ECO:0000250|UniProtKB:Q9CR62}; propagated from UniProtKB/Swiss-Prot (Q02978.3)][N6-acetyllysine. {ECO:0000244|PubMed:19608861}…
152	1	gi|44889481|ref|NP_036355.2|	gi|44889481|ref|NP_036355.2|	unconventional myosin-Ib isoform 2 [Homo sapiens]	MYO1B	14	51	51	14	0	51	17.25	0.00148699	1.38454	17	91	91	17	0	91	20.96	0.00107406	0.354749	5	10	10	5	0	10	6.49	0.00038087	1078	124951	9.2	o	24	0.095	Q	24	2		[16..701][29..688][749..771][882..1078]	[MYSc][MYSc_Myo1][IQ][Myosin_TH1]	[Myosin. Large ATPases; smart00242][class I myosin, motor domain; cd01378][Calmodulin-binding motif; smart00015][Myosin tail; pfam06017]	[order(56..59,64,108..115,155..165,387..392)][order(56..59,64)][108..115][155..165][387..392][order(416..427,430..437,439)][620..630][order(632..658,675..688)]	[other][other][other][other][other][other][other][other]	[ATP binding site [chemical binding]][purine-binding loop][P-loop][switch I region][switch II region][relay loop][SH1 helix][converter subdomain]
153	1	gi|403310653|ref|NP_001258115.1|	gi|403310653|ref|NP_001258115.1|	ras-related protein Rap-2c isoform 1 precursor [Homo sapiens]	RAP2C	5	13	3	2	10	6.33333	45.36	0.00108777	1.38247	5	25	8	1	17	11.3171	32.79	0.00078684	1.13977	2	5	3	1	2	4	20.77	0.00089743	183	20745	4.9	o	27	0.117	Q	19	X		[3..165][16..164][32..40]	[Rap2][Ras][Effector region. {ECO:0000305}]	[Rap2 family GTPase consists of Rap2a, Rap2b, and Rap2c; cd04176][Ras family; pfam00071][propagated from UniProtKB/Swiss-Prot (Q9Y3L5.1)]	[10..17][order(11..12,59..60)][order(13..18,28..31,116..117,119,146..147)][order(17..18,32,34,40..41,54..55,57,59..60,148)][order(25,31,33,36..41)][33..40][35][57..60][order(59..65,68..73,76..77)][116..119][146..148][180]	[other][other][other][other][other][other][other][other][other][other][other][methylation]	[G1 box][putative GDI interaction site [polypeptide binding]][GTP/Mg2+ binding site [chemical binding]][putative GEF interaction site [polypeptide binding]][putative effector interaction site][Switch I region][G2 box][G3 box][Switch II region][G4 box][G5 box][Cysteine methyl ester. {ECO:0000250|UniProtKB:Q8BU31}; propagated from UniProtKB/Swiss-Prot (Q9Y3L5.1)]
154	1	gi|225579061|ref|NP_001139433.1|	gi|225579061|ref|NP_001139433.1|	solute carrier family 12 member 4 isoform b [Homo sapiens]	SLC12A4	3	5	5	3	0	5	4.73	0.00014565	1.37736	4	9	9	4	0	9	5.38	0.00010613	8.56604	5	24	23	4	1	23.8519	6.12	0.00090759	1079	119963	6.6						16		[42..1079][142..>303][947..976]	[2a30][SLC5-6-like_sbd][KCl_Cotrans_1]	[K-Cl cotransporter; TIGR00930][Solute carrier families 5 and 6-like; solute binding domain; cl00456][K-Cl Co-transporter type 1 (KCC1); pfam03522]	[24][47][51][88][119..139][149..169][215..235][253..273][276..296][356..376][408..428][453..473][494..514][567..587][628..648][845..865][961]	[phosphorylation][phosphorylation][phosphorylation][phosphorylation][transmembrane region][transmembrane region][transmembrane region][transmembrane region][transmembrane region][transmembrane region][transmembrane region][transmembrane region][transmembrane region][transmembrane region][transmembrane region][transmembrane region][phosphorylation]	[Phosphoserine. {ECO:0000250|UniProtKB:Q9JIS8}; propagated from UniProtKB/Swiss-Prot (Q9UP95.2)][Phosphoserine. {ECO:0000250|UniProtKB:Q9JIS8}; propagated from UniProtKB/Swiss-Prot (Q9UP95.2)][Phosphoserine. {ECO:0000244|PubMed:18669648}; propagated from UniProtKB/Swiss-Prot (Q9UP95.2)][Phosphoserine. {ECO:0000244|PubMed:24275569}; propagated from UniProtKB/Swiss-Prot (Q9UP95.2)][propagated from …
155	4	gi|164519136|ref|NP_001106818.1|;gi|164519138|ref|NP_001106819.1|;gi|164519140|ref|NP_001106820.1|;gi|4503443|ref|NP_001388.1|	gi|164519136|ref|NP_001106818.1|	endothelin-converting enzyme 1 isoform 3 [Homo sapiens]	ECE1	5	10	10	5	0	10	11.74	0.00041466	1.37417	8	18	18	8	0	18	18.07	0.00030214	1.7947	4	10	10	4	0	10	9.37	0.00054165	758	85808	6.5						1	3.4.24.71	[94..749][107..756]	[PepO][M13]	[Predicted metalloendopeptidase [Posttranslational modification, protein turnover, chaperones]; COG3590][Peptidase family M13 includes neprilysin, endothelin-converting enzyme I; cd08662]	[order(554..555,592,595..596,599,655,698..699,720,726)][order(595,599,655)]	[active][other]	[][Zn binding site [ion binding]]
156	1	gi|6005884|ref|NP_009038.1|	gi|6005884|ref|NP_009038.1|	translocon-associated protein subunit gamma [Homo sapiens]	SSR3	1	5	5	1	0	5	7.57	0.00084949	1.37157	1	9	9	1	0	9	7.57	0.00061898	2.86753	2	8	8	2	0	8	10.27	0.00177546	185	21080	9.6	i29-51o55-77i138-157o162-184i	42	0.116	Q	42	3		[12..183]	[TRAP-gamma]	[Translocon-associated protein, gamma subunit (TRAP-gamma); pfam07074]	[7][11][28..48][55..76][105][105][136..157][164..184]	[phosphorylation][phosphorylation][transmembrane region][transmembrane region][phosphorylation][phosphorylation][transmembrane region][transmembrane region]	[Phosphoserine. {ECO:0000250|UniProtKB:Q9DCF9}; propagated from UniProtKB/Swiss-Prot (Q9UNL2.1)][Phosphoserine. {ECO:0000244|PubMed:18669648, ECO:0000244|PubMed:18691976, ECO:0000244|PubMed:24275569}; propagated from UniProtKB/Swiss-Prot (Q9UNL2.1)][propagated from UniProtKB/Swiss-Prot (Q9UNL2.1)][propagated from UniProtKB/Swiss-Prot (Q9UNL2.1)][][Phosphoserine. {ECO:0000250|UniProtKB:Q9DCF9}; pr…
157	2	gi|18450371|ref|NP_543031.1|;gi|4506303|ref|NP_002827.1|	gi|18450371|ref|NP_543031.1|	receptor-type tyrosine-protein phosphatase alpha isoform 2 precursor [Homo sapiens]	PTPRA	5	10	10	5	0	10	9.08	0.00039636	1.37024	6	18	18	6	0	18	11.1	0.0002888	1.79239	5	10	10	5	0	10	9.46	0.00051775	793	89703	6.6	o4-26i143-165o	20	0.851	S	20	20	3.1.3.48	[231..491][258..491][433..439][523..781][551..781]	[PTPc][PTPc][Substrate binding. {ECO:0000250}][PTPc][PTPc]	[Protein tyrosine phosphatase, catalytic domain; smart00194][Protein tyrosine phosphatases (PTP) catalyze the dephosphorylation of phosphotyrosine peptides; they regulate phosphotyrosine levels in signal transduction pathways. The depth of the active site cleft renders the enzyme specific for phosphorylated Tyr...; cd00047][propagated from UniProtKB/Swiss-Prot (P18433.2)][Protein tyrosine phospha…	[143..165][178][180][202][204][204][order(401,432..433,436,439..440)][order(690,722..723,726,729..730)][789][789][789]	[transmembrane region][phosphorylation][phosphorylation][phosphorylation][phosphorylation][phosphorylation][active][active][phosphorylation][modified][phosphorylation]	[propagated from UniProtKB/Swiss-Prot (P18433.2)][][][Phosphoserine. {ECO:0000250|UniProtKB:P18052}; propagated from UniProtKB/Swiss-Prot (P18433.2)][][Phosphoserine. {ECO:0000250|UniProtKB:P18052}; propagated from UniProtKB/Swiss-Prot (P18433.2)][][][][dephosphorylation site][Phosphotyrosine. {ECO:0000244|PubMed:19690332, ECO:0000244|PubMed:20068231, ECO:0000244|PubMed:24275569}; propagated from…
158	1	gi|190014578|ref|NP_054735.3|	gi|190014578|ref|NP_054735.3|	phosphatidylinositide phosphatase SAC1 [Homo sapiens]	SACM1L	3	6	6	3	0	6	5.96	0.00032127	1.34874	3	11	11	3	0	11	6.81	0.00023843	3.23109	6	11	11	6	0	11	9.88	0.00076939	587	66967	7.1						3		[57..513][57..351]	[COG5329][Syja_N]	[Phosphoinositide polyphosphatase (Sac family) [Signal transduction mechanisms]][SacI homology domain; pfam02383]	[56..76][456][521..541][549..569]	[transmembrane region][acetylation][transmembrane region][transmembrane region]	[propagated from UniProtKB/Swiss-Prot (Q9NTJ5.2)][N6-acetyllysine. {ECO:0000244|PubMed:19608861}; propagated from UniProtKB/Swiss-Prot (Q9NTJ5.2)][propagated from UniProtKB/Swiss-Prot (Q9NTJ5.2)][propagated from UniProtKB/Swiss-Prot (Q9NTJ5.2)]
159	1	gi|148613856|ref|NP_001091974.1|	gi|148613856|ref|NP_001091974.1|	probable ATP-dependent RNA helicase DDX17 isoform 3 [Homo sapiens]	DDX17	6	18	14	5	4	17.7333	10.4	0.00076248	1.3345	6	35	28	5	7	32.7805	9.99	0.00057056	0.0980736	1	1	1	1	0	1	1.78	5.617e-05	731	80458	8.4	o	22	0.488	S	22	22	3.6.4.13	[171..199][173..378][191..393][325..328][389..521]	[Q motif][DEADc][DEXDc][DEAD box][HELICc]	[propagated from UniProtKB/Swiss-Prot (Q92841.2)][DEAD-box helicases. A diverse family of proteins involved in ATP-dependent RNA unwinding, needed in a variety of cellular processes including splicing, ribosome biogenesis and RNA degradation. The name derives from the sequence of the Walker B motif...; cd00268][DEAD-like helicases superfamily; smart00487][propagated from UniProtKB/Swiss-Prot (Q92…	[64][218..222][325..328][356..358][order(426..429,449..450,475..477)][order(483,504,508,511)][523][604][674][678]	[phosphorylation][other][other][other][other][other][phosphorylation][phosphorylation][phosphorylation][phosphorylation]	[Phosphoserine. {ECO:0000244|PubMed:20068231, ECO:0000244|PubMed:24275569}; propagated from UniProtKB/Swiss-Prot (Q92841.2)][ATP binding site [chemical binding]][Mg++ binding site [ion binding]][motif III][nucleotide binding region [chemical binding]][ATP-binding site [chemical binding]][Phosphothreonine. {ECO:0000244|PubMed:16964243}; propagated from UniProtKB/Swiss-Prot (Q92841.2)][][][]
160	1	gi|110624774|ref|NP_006030.2|	gi|110624774|ref|NP_006030.2|	C-type mannose receptor 2 precursor [Homo sapiens]	MRC2	3	7	7	3	0	7	2.43	0.00014876	1.33036	3	13	13	3	0	13	2.84	0.00011184	7.6875	4	31	31	4	0	31	3.79	0.00086057	1479	166674	5.8	o1413-1435i	31	0.669	S	31	17		[43..>127][46..161][181..228][247..361][382..506][531..644][681..810][837..952][982..1109][1137..1245][1276..1394]	[RICIN][RICIN][FN2][CLECT][CLECT_DC-SIGN_like][CLECT][CLECT][CLECT][CLECT][CLECT][CLECT]	[Ricin-type beta-trefoil; Carbohydrate-binding domain formed from presumed gene triplication. The domain is found in a variety of molecules serving diverse functions such as enzymatic activity, inhibitory toxicity and signal transduction. Highly specific...; cd00161][Ricin-type beta-trefoil; smart00458][Fibronectin Type II domain: FN2 is one of three types of internal repeats which combine to for…	[order(56,63,65,74..75,97,108,110,118..119)][order(75..77,119..121)][order(191,193,198,212,219,225,227)][order(333,337,339,345,347..350,353..355)][order(439,470,472,479,485..486,492..495)][order(446,450,473,479..480)][order(450,480)][order(617,620,622,629,631..634,637,639..640)][order(783,787,789,794,796..799,802..804)][order(925,929,931,938..941,944..946)][order(1076,1080,1082,1092,1094..1097,11…	[other][other][other][other][other][other][other][other][other][other][other][other][other][transmembrane region]	[putative sugar binding sites [chemical binding]][Q-X-W motif][putative gelatin-binding site][ligand binding surface [chemical binding]][carbohydrate binding site][calcium binding site 1 [ion binding]][calcium binding site 3 [ion binding]][ligand binding surface [chemical binding]][ligand binding surface [chemical binding]][ligand binding surface [chemical binding]][ligand binding surface [chemic…
161	1	gi|10835049|ref|NP_001655.1|	gi|10835049|ref|NP_001655.1|	transforming protein RhoA precursor [Homo sapiens]	RHOA	6	17	7	3	10	14.9722	43.52	0.0024383	1.32428	5	53	9	2	44	27.9205	49.22	0.00184065	0.476915	3	6	3	2	3	4.125	27.46	0.00087752	193	21768	6.1	o	17	0.216	Q	23	3		[5..179][7..180][34..42]	[RhoA_like][Ras][Effector region. {ECO:0000255}]	[Ras homology family A (RhoA)-like includes RhoA, RhoB and RhoC; cd01870][Ras family; pfam00071][propagated from UniProtKB/Swiss-Prot (P61586.1)]	[order(5,34,37..38,41,43,45,54,58..59,61..63,66,68,72)][12..19][order(15..20,34..35,37,59..60,118,120,161..162)][order(23,25..29,42..43,45..47,52..54,163..164,168..169,][order(34,36,38..39,63..66,69,72,94)][34..42][34][order(37..38,61,66,68..69,71..72,75,105..106,108)][37][37][order(39,65..69,72,97,101,105)][order(39..40,65..66,68..69,72)][41][59..62][62..79][117..120][160..162][188][188][189..19…	[other][other][other][other][other][other][modified][other][other][modified][other][other][modified][other][other][other][other][phosphorylation][phosphorylation][cleavage][methylation]	[GEF (guanine nucleotide exchange factor) interaction site [polypeptide binding]][G1 box][GTP/Mg2+ binding site [chemical binding]][PKN/PRK1 effector interaction site][GAP (GTPase-activating protein) interaction site [polypeptide binding]][Switch I region][O-AMP-tyrosine, by Haemophilus IbpA. {ECO:0000269|PubMed:19362538}; propagated from UniProtKB/Swiss-Prot (P61586.1)][GDI (guanine nucleotide d…
162	1	gi|148596949|ref|NP_004732.2|	gi|148596949|ref|NP_004732.2|	nucleolar and coiled-body phosphoprotein 1 isoform 2 [Homo sapiens]	NOLC1	1	9	9	1	0	9	3.29	0.00040469	1.31068	1	17	17	1	0	17	3.29	0.00030944	8.90615	2	47	46	1	1	46.8519	4.86	0.00275195	699	73603	9.5	o	21	0.217	Q	28	10		[68..82][84..566][204..382][384..587][601..617][623..696]	[Nuclear localization signal (Potential)][11 X 12 AA approximate repeats of an acidic serine cluster][Interacts with RPA194][Nuclear localization signal (Potential)][Nuclear localization signal (Potential)][SRP40_C]	[propagated from UniProtKB/Swiss-Prot (Q14978.2)][propagated from UniProtKB/Swiss-Prot (Q14978.2)][propagated from UniProtKB/Swiss-Prot (Q14978.2)][propagated from UniProtKB/Swiss-Prot (Q14978.2)][propagated from UniProtKB/Swiss-Prot (Q14978.2)][SRP40, C-terminal domain; pfam05022]	[33][83][84][85][87][87][90][90][91][91][366][397][415][508][538][538][563][563][580][582][607][607][607][610][610][610][622][622][622][623][643][643][663][686][688][698][698][698]	[acetylation][phosphorylation][phosphorylation][phosphorylation][phosphorylation][phosphorylation][phosphorylation][phosphorylation][phosphorylation][phosphorylation][phosphorylation][phosphorylation][acetylation][phosphorylation][phosphorylation][phosphorylation][phosphorylation][phosphorylation][phosphorylation][phosphorylation][phosphorylation][phosphorylation][phosphorylation][phosphorylation…	[N6-acetyllysine; propagated from UniProtKB/Swiss-Prot (Q14978.2)][][][][][Phosphoserine; propagated from UniProtKB/Swiss-Prot (Q14978.2)][][Phosphoserine; propagated from UniProtKB/Swiss-Prot (Q14978.2)][][Phosphoserine; propagated from UniProtKB/Swiss-Prot (Q14978.2)][Phosphoserine; propagated from UniProtKB/Swiss-Prot (Q14978.2)][Phosphoserine; propagated from UniProtKB/Swiss-Prot (Q14978.2)][…
163	2	gi|10835063|ref|NP_002511.1|;gi|40353734|ref|NP_954654.1|	gi|10835063|ref|NP_002511.1|	nucleophosmin isoform 1 [Homo sapiens]	NPM1	5	45	45	5	0	45	27.55	0.00481086	1.30769	6	85	85	6	0	85	27.55	0.00367855	0.151943	1	4	4	1	0	4	4.76	0.0005586	294	32575	4.8	o	3	0.038	Q	0	5		[1..186][1..117][13..>119][152..157][191..197][243..294]	[Required for interaction with SENP3][Necessary for interaction with APEX1][Nucleoplasmin][Nuclear localization signal. {ECO:0000255}][Nuclear localization signal. {ECO:0000255}][Required for nucleolar localization]	[propagated from UniProtKB/Swiss-Prot (P06748.2)][propagated from UniProtKB/Swiss-Prot (P06748.2)][Nucleoplasmin; pfam03066][propagated from UniProtKB/Swiss-Prot (P06748.2)][propagated from UniProtKB/Swiss-Prot (P06748.2)][propagated from UniProtKB/Swiss-Prot (P06748.2)]	[1][4][4][10][10][32][55][67][70][70][70][75][80][95][95][125][125][125][137][139][150][154][175..176][199][199][212][219][219][227][229][230][234][234][237][237][242][243][250][254][254][254][257][260][267][273][279][292]	[acetylation][phosphorylation][phosphorylation][phosphorylation][phosphorylation][acetylation][other][phosphorylation][phosphorylation][phosphorylation][phosphorylation][phosphorylation][other][phosphorylation][phosphorylation][phosphorylation][phosphorylation][phosphorylation][phosphorylation][phosphorylation][acetylation][acetylation][other][phosphorylation][phosphorylation][acetylation][phosph…	[N-acetylmethionine. {ECO:0000244|PubMed:19413330, ECO:0000244|PubMed:20068231, ECO:0000244|PubMed:21406692, ECO:0000244|PubMed:22223895, ECO:0000269|Ref.17}; propagated from UniProtKB/Swiss-Prot (P06748.2)][][Phosphoserine, by PLK1 and PLK2. {ECO:0000244|PubMed:20068231, ECO:0000244|PubMed:21406692, ECO:0000269|PubMed:15190079, ECO:0000269|PubMed:20352051}; propagated from UniProtKB/Swiss-Prot (…
164	1	gi|21361181|ref|NP_000692.2|	gi|21361181|ref|NP_000692.2|	sodium/potassium-transporting ATPase subunit alpha-1 isoform a [Homo sapiens]	ATP1A1	20	195	60	10	135	195	26.39	0.00599124	1.29507	18	385	135	10	250	371.943	25.02	0.004626	0.735841	16	85	32	7	53	84.8182	20.82	0.00340412	1023	112896	5.5	i98-120o130-149i290-312o322-344i776-798o802-824i862-884o913-932i953-975o985-1002i	5	0.037	Q	0	1	3.6.3.9	[30..1023][40..114][82..84][135..366][427..521][606..752][799..1008]	[ATPase-IIC_X-K][Cation_ATPase_N][Phosphoinositide-3 kinase binding. {ECO:0000250}][E1-E2_ATPase][Hydrolase_like2][COG4087][Cation_ATPase_C]	[sodium or proton efflux -- potassium uptake antiporter, P-type ATPase, alpha subunit; TIGR01106][Cation transporter/ATPase, N-terminus; smart00831][propagated from UniProtKB/Swiss-Prot (P05023.1)][E1-E2 ATPase; pfam00122][Putative hydrolase of sodium-potassium ATPase alpha subunit; pfam13246][Soluble P-type ATPase [General function prediction only]][Cation transporting ATPase, C-terminus; pfam00…	[9][10][10][16][16][21][40][47][88..108][132..152][228][260][260][289..308][321..338][452][484][542][661][668][675][773..792][803..823][844..866][919..938][943][952..970][986..1006]	[acetylation][phosphorylation][phosphorylation][phosphorylation][phosphorylation][acetylation][phosphorylation][phosphorylation][transmembrane region][transmembrane region][phosphorylation][phosphorylation][phosphorylation][transmembrane region][transmembrane region][phosphorylation][phosphorylation][phosphorylation][modified][phosphorylation][phosphorylation][transmembrane region][transmembrane …	[N6-acetyllysine. {ECO:0000250|UniProtKB:Q8VDN2}; propagated from UniProtKB/Swiss-Prot (P05023.1)][][Phosphotyrosine. {ECO:0000250|UniProtKB:P06685}; propagated from UniProtKB/Swiss-Prot (P05023.1)][][Phosphoserine. {ECO:0000250|UniProtKB:P06685}; propagated from UniProtKB/Swiss-Prot (P05023.1)][N6-acetyllysine. {ECO:0000250|UniProtKB:Q8VDN2}; propagated from UniProtKB/Swiss-Prot (P05023.1)][Phos…
165	3	gi|24430149|ref|NP_705618.1|;gi|4758844|ref|NP_004289.1|;gi|509155837|ref|NP_001265241.1|	gi|24430149|ref|NP_705618.1|	nuclear pore complex protein Nup155 isoform 1 [Homo sapiens]	NUP155	1	1	1	1	0	1	1.29	2.26e-05	1.27778	2	2	2	2	0	2	2.44	1.829e-05	4.94444	2	3	3	2	0	3	2.8	8.855e-05	1391	155199	6.2	o	17	0.42	S	17	5		[77..427][700..1255]	[Nucleoporin_N][Nucleoporin_C]	[Nup133 N terminal like; pfam08801][Non-repetitive/WGA-negative nucleoporin C-terminal; pfam03177]
166	1	gi|77539758|ref|NP_001029249.1|	gi|77539758|ref|NP_001029249.1|	histone H4 [Homo sapiens]	HIST2H4B	7	61	61	7	0	61	51.46	0.0186145	1.27703	9	118	118	9	0	118	60.19	0.0145764	3.14496	9	115	115	9	0	115	60.19	0.0458408	103	11367	11.4	o	4	0.051	Q	0	1		[1..103][18..101]	[PLN00035][H4]	[histone H4; Provisional][Histone H4, one of the four histones, along with H2A, H2B and H3, which forms the eukaryotic nucleosome core; along with H3, it plays a central role in nucleosome formation; histones bind to DNA and wrap the genetic material into 'beads on a string' in...; cd00076]	[2][2][4][4][6][6][9][9][13][13][17][17][21][32][order(34,38,42,44,48,51,54..55,58..59,62..63,66..67,87,91)][order(41,43,45)][order(45..46,48,74,78..79,81,83,97)][48][52][order(69,72..73,76..79,85..86,89,92..93)][89][92][92][97..101]	[acetylation][phosphorylation][methylation][modified][acetylation][modified][acetylation][modified][acetylation][modified][acetylation][modified][methylation][acetylation][other][other][DNA binding][phosphorylation][phosphorylation][other][phosphorylation][acetylation][modified][other]	[N-acetylserine. {ECO:0000269|PubMed:17967882}; propagated from UniProtKB/Swiss-Prot (P62805.2)][Phosphoserine. {ECO:0000269|PubMed:17967882}; propagated from UniProtKB/Swiss-Prot (P62805.2)][Asymmetric dimethylarginine, by PRMT1, alternate. {ECO:0000269|PubMed:11387442, ECO:0000269|PubMed:11448779, ECO:0000269|PubMed:15345777}; Omega-N-methylarginine, by PRMT1, alternate. {ECO:0000269|PubMed:113…
167	1	gi|4503483|ref|NP_001952.1|	gi|4503483|ref|NP_001952.1|	elongation factor 2 [Homo sapiens]	EEF2	14	33	33	14	0	33	22.38	0.00120888	1.25415	17	65	65	17	0	65	29.02	0.0009639	0.198133	1	4	4	1	0	4	2.1	0.00019141	858	95338	6.8	o	12	0.032	Q	0	19		[1..858][20..233][394..487][503..565][574..746][742..821]	[PTZ00416][EF2][eEF2_snRNP_like_II][EFG_II][aeEF2_snRNP_like_IV][eEF2_snRNP_like_C]	[elongation factor 2; Provisional][Elongation Factor 2 (EF2) in archaea and eukarya; cd01885][EF2_snRNP_like_II: this subfamily represents domain II of elongation factor (EF) EF-2 found eukaryotes and archaea and, the C-terminal portion of the spliceosomal human 116kD U5 small nuclear ribonucleoprotein (snRNP) protein (U5-116 kD) and, its yeast...; cd03700][Elongation Factor G, domain II; pfam144…	[26..33][order(27,29,33..34,37,40..41,73..74,108..109,132..133,176,][order(29..34,158..159,161,216..218)][54..73][54][57][57][57][57][57][57][59][59][59][59][69][104..107][106..124][152][158..161][216..218][235][239][265][272][272][275][373][373][435][435][439][445][502][502][525][567][572][586..587][595][605..606][619][715][715]	[other][other][other][other][phosphorylation][phosphorylation][phosphorylation][phosphorylation][modified][modified][phosphorylation][phosphorylation][phosphorylation][modified][phosphorylation][other][other][other][modified][other][other][acetylation][acetylation][phosphorylation][acetylation][modified][acetylation][phosphorylation][phosphorylation][phosphorylation][phosphorylation][acetylation]…	[G1 box][putative GEF interaction site [polypeptide binding]][GTP/Mg2+ binding site [chemical binding]][Switch I region][Phosphothreonine. {ECO:0000269|PubMed:21406692}; propagated from UniProtKB/Swiss-Prot (P13639.4)][][][][dephosphorylation site][dephosphorylation site][Phosphothreonine, by EEF2K. {ECO:0000269|PubMed:20068231, ECO:0000269|PubMed:21406692, ECO:0000269|PubMed:23184662}; propagate…
168	10	gi|10835010|ref|NP_001322.1|;gi|146231940|ref|NP_001078927.1|;gi|146231962|ref|NP_001078928.1|;gi|146231968|ref|NP_001078930.1|;gi|332634644|ref|NP_001193813.1|;gi|332688208|ref|NP_001193812.1|;gi|332688210|ref|NP_001193814.1|;gi|332688212|ref|NP_001193815.1|;gi|332688214|ref|NP_001193816.1|;gi|332688222|ref|NP_001193820.1|	gi|10835010|ref|NP_001322.1|	catenin delta-1 isoform 1B [Homo sapiens]	CTNND1	15	47	47	15	0	47	23.49	0.00156988	1.24901	18	93	93	18	0	93	26.99	0.00125747	0.0692124	1	2	2	1	0	2	1.28	8.726e-05	941	104958	6.3	o	40	0.021	Q	22	11		[363..481][524..>588][651..753]	[ARM][ARM][ARM]	[Armadillo/beta-catenin-like repeats. An approximately 40 amino acid long tandemly repeated sequence motif first identified in the Drosophila segment polarity gene armadillo; these repeats were also found in the mammalian armadillo homolog beta-catenin; cd00020][Armadillo/beta-catenin-like repeats. An approximately 40 amino acid long tandemly repeated sequence motif first identified in the Drosop…	[47][96][112][122][174][217][228][228][252][257][268][268][269][280][288][291][296][302][310][312][321][334][346][349][352][order(384,388,392,423,427,430,434,471,474,477..478,481)][order(528,532,536,574,578,581,585)][order(676,680,684,719,723,726,730)][859][889][893]	[phosphorylation][phosphorylation][phosphorylation][phosphorylation][phosphorylation][phosphorylation][phosphorylation][phosphorylation][phosphorylation][phosphorylation][phosphorylation][modified][phosphorylation][phosphorylation][phosphorylation][phosphorylation][phosphorylation][phosphorylation][phosphorylation][phosphorylation][phosphorylation][phosphorylation][phosphorylation][phosphorylatio…	[][][][][][][][][][][][dephosphorylation site][][][][][][][][][][][][][][protein binding surface [polypeptide binding]][protein binding surface [polypeptide binding]][protein binding surface [polypeptide binding]][][][]
169	3	gi|10835047|ref|NP_003910.1|;gi|150378454|ref|NP_001092871.1|;gi|150378535|ref|NP_001092870.1|	gi|10835047|ref|NP_003910.1|	epsilon-sarcoglycan isoform 2 [Homo sapiens]	SGCE	1	1	1	1	0	1	4.35	7.192e-05	1.24138	1	2	2	1	0	2	4.35	5.823e-05	11.3448	2	7	7	2	0	7	9.15	0.00065767	437	49851	6.5	o317-339i	47	0.152	A	47	7		[30..418][51..155]	[Sarcoglycan_2][CADG]	[Sarcoglycan alpha/epsilon; pfam05510][Dystroglycan-type cadherin-like domains; smart00736]	[318..338]	[transmembrane region]	[propagated from UniProtKB/Swiss-Prot (O43556.6)]
170	1	gi|162329583|ref|NP_008938.2|	gi|162329583|ref|NP_008938.2|	cleavage and polyadenylation specificity factor subunit 6 [Homo sapiens]	CPSF6	1	1	1	1	0	1	2.9	5.704e-05	1.23913	1	2	2	1	0	2	2.9	4.618e-05	1.63043	1	1	1	1	0	1	4.54	7.451e-05	551	59210	7.2						12		[81..161][82..158][83..156][510..551]	[Necessary for interaction with NUDT21/CPSF5][RRM_CFIm68][RRM][Sufficient for nuclear targeting]	[propagated from UniProtKB/Swiss-Prot (Q16630.2)][RNA recognition motif of pre-mRNA cleavage factor Im 68 kDa subunit (CFIm68 or CPSF6) and similar proteins; cd12643][RNA recognition motif; smart00360][propagated from UniProtKB/Swiss-Prot (Q16630.2)]	[order(90..95,113,116..123)][404][407]	[other][phosphorylation][phosphorylation]	[polypeptide substrate binding site [polypeptide binding]][Phosphothreonine. {ECO:0000244|PubMed:18220336}; propagated from UniProtKB/Swiss-Prot (Q16630.2)][Phosphothreonine. {ECO:0000244|PubMed:19690332}; propagated from UniProtKB/Swiss-Prot (Q16630.2)]
171	2	gi|221136993|ref|NP_001137484.1|;gi|7705726|ref|NP_057043.1|	gi|221136993|ref|NP_001137484.1|	thioredoxin-related transmembrane protein 2 isoform 2 [Homo sapiens]	TMX2	1	2	2	1	0	2	3.88	0.00024365	1.23858	2	4	4	2	0	4	8.53	0.00019726	1.61421	1	2	2	1	0	2	3.88	0.00031827	258	29642	8.7						11		[83..221]	[TMX2]	[TMX2 family; composed of proteins similar to human TMX2, a 372-amino acid TRX-related transmembrane protein, identified and characterized through the cloning of its cDNA from a human fetal library. It contains a TRX domain but the redox active CXXC motif...; cd02962]
172	1	gi|21361103|ref|NP_003696.2|	gi|21361103|ref|NP_003696.2|	calcium-binding mitochondrial carrier protein Aralar1 [Homo sapiens]	SLC25A12	8	24	19	6	5	22.9583	17.99	0.00106431	1.23721	10	48	40	8	8	45.8182	19.62	0.00085983	0.211628	2	3	3	2	0	3	4.57	0.00018167	678	74762	8.4	o	31	0.063	Q	31	2		[28..80][64..109][324..416][329..421][330..603][422..513][424..508][516..604][519..605]	[EF-hand_7][EF-hand_7][Solcar 1][Mito_carr][PTZ00169][Mito_carr][Solcar 2][Solcar 3][Mito_carr]	[EF-hand domain pair; pfam13499][EF-hand domain pair; pfam13499][propagated from UniProtKB/Swiss-Prot (O75746.2)][Mitochondrial carrier protein; pfam00153][ADP/ATP transporter on adenylate translocase; Provisional][Mitochondrial carrier protein; pfam00153][propagated from UniProtKB/Swiss-Prot (O75746.2)][propagated from UniProtKB/Swiss-Prot (O75746.2)][Mitochondrial carrier protein; pfam00153]	[2][330..347][391..410][434..447][483..502][522..539][579..598]	[acetylation][transmembrane region][transmembrane region][transmembrane region][transmembrane region][transmembrane region][transmembrane region]	[N-acetylalanine. {ECO:0000244|PubMed:22814378}; propagated from UniProtKB/Swiss-Prot (O75746.2)][propagated from UniProtKB/Swiss-Prot (O75746.2)][propagated from UniProtKB/Swiss-Prot (O75746.2)][propagated from UniProtKB/Swiss-Prot (O75746.2)][propagated from UniProtKB/Swiss-Prot (O75746.2)][propagated from UniProtKB/Swiss-Prot (O75746.2)][propagated from UniProtKB/Swiss-Prot (O75746.2)]
173	1	gi|6005757|ref|NP_009123.1|	gi|6005757|ref|NP_009123.1|	FACT complex subunit SPT16 [Homo sapiens]	SUPT16H	2	4	4	2	0	4	2.77	0.00012008	1.23711	2	8	8	2	0	8	2.77	9.722e-05	0.402062	1	1	1	1	0	1	1.62	3.921e-05	1047	119914	5.7	o	17	0.048	Q	0	14		[5..1001][5..168][180..420][529..689][806..894]	[COG5406][FACT-Spt16_Nlob][CDC68-like][SPT16][Rtt106]	[Nucleosome binding factor SPN, SPT16 subunit [Transcription, Replication, recombination and repair, Chromatin structure and dynamics]][FACT complex subunit SPT16 N-terminal lobe domain; pfam14826][Related to aminopeptidase P and aminopeptidase M, a member of this domain family is present in cell division control protein 68, a transcription factor; cd01091][FACT complex subunit (SPT16/CDC68); pfa…	[2][139][188][196][223][order(248,267,285,350,380,404)][508][513][650][732][786][903][904][979][979][982][982][986][986][1015]	[acetylation][acetylation][phosphorylation][acetylation][acetylation][active][phosphorylation][acetylation][phosphorylation][acetylation][acetylation][phosphorylation][acetylation][phosphorylation][phosphorylation][phosphorylation][phosphorylation][phosphorylation][phosphorylation][phosphorylation]	[N-acetylalanine. {ECO:0000244|PubMed:22223895, ECO:0000244|PubMed:22814378, ECO:0000269|Ref.3, ECO:0000269|Ref.4}; propagated from UniProtKB/Swiss-Prot (Q9Y5B9.1)][N6-acetyllysine. {ECO:0000244|PubMed:19608861}; propagated from UniProtKB/Swiss-Prot (Q9Y5B9.1)][Phosphoserine. {ECO:0000244|PubMed:21406692}; propagated from UniProtKB/Swiss-Prot (Q9Y5B9.1)][N6-acetyllysine. {ECO:0000244|PubMed:19608…
174	1	gi|14141170|ref|NP_004730.2|	gi|14141170|ref|NP_004730.2|	metastasis-associated protein MTA2 [Homo sapiens]	MTA2	1	2	2	1	0	2	2.25	9.41e-05	1.23684	2	4	4	2	0	4	4.94	7.619e-05	11.3158	5	14	14	5	0	14	10.93	0.00086048	668	75023	9.7	o	3	0.102	Q	0	11		[3..168][147..201][266..313][267..312][363..414][366..>402]	[BAH_MTA][ELM2][SANT][SANT_MTA3_like][ZnF_GATA][ZnF_GATA]	[BAH, or Bromo Adjacent Homology domain, as present in MTA1 and similar proteins. The Metastasis-associated protein MTA1 is part of the NURD (nucleosome remodeling and deacetylating) complex and plays a role in cellular transformation and metastasis. BAH...; cd04709][ELM2 domain; pfam01448][SANT SWI3, ADA2, N-CoR and TFIIIB'' DNA-binding domains; smart00717][Myb-Like Dna-Binding Domain of MTA3 an…	[54][57][152][order(268,298..299,301..302,304..306,308..310)][order(367,370,391,394)][order(376..377,379,391..401)][433][435][435][437][460][522][531][534][548]	[phosphorylation][phosphorylation][acetylation][other][other][DNA binding][phosphorylation][phosphorylation][phosphorylation][phosphorylation][acetylation][acetylation][acetylation][phosphorylation][phosphorylation]	[Phosphoserine. {ECO:0000250|UniProtKB:Q9R190}; propagated from UniProtKB/Swiss-Prot (O94776.1)][][N6-acetyllysine. {ECO:0000244|PubMed:19608861}; propagated from UniProtKB/Swiss-Prot (O94776.1)][putative DNA binding site [nucleotide binding]][zinc binding site [ion binding]][DNA-binding region [nucleotide binding]][Phosphoserine. {ECO:0000244|PubMed:18669648}; propagated from UniProtKB/Swiss-Pro…
175	2	gi|323714253|ref|NP_001191184.1|;gi|5031631|ref|NP_005497.1|	gi|323714253|ref|NP_001191184.1|	lysosome membrane protein 2 isoform 2 precursor [Homo sapiens]	SCARB2	1	2	2	1	0	2	3.58	0.00018765	1.23684	1	4	4	1	0	4	3.58	0.00015192	4.03289	1	5	5	1	0	5	3.58	0.0006128	335	37767	5.1						4		[28..316]	[CD36]	[CD36 family; pfam01130]
176	2	gi|410442521|ref|NP_001258570.1|;gi|7657345|ref|NP_055156.1|	gi|410442521|ref|NP_001258570.1|	mitochondrial carrier homolog 1 PSAP-LL [Homo sapiens]	MTCH1	1	2	2	1	0	2	2.83	0.0001616	1.23664	2	4	4	2	0	4	5.91	0.00013083	7.25191	4	9	9	4	0	9	11.57	0.00094991	389	41544	9.3	o248-270i315-337o	34	0.063	Q	34	6		[19][81..176][192..280][206..>266]	[Alternative start codon encodes isoform PSAP-L][Solcar 1][Solcar 2][Mito_carr]	[][propagated from UniProtKB/Swiss-Prot (Q9NZJ7.1)][propagated from UniProtKB/Swiss-Prot (Q9NZJ7.1)][Mitochondrial carrier protein; pfam00153]	[248..268][315..335]	[transmembrane region][transmembrane region]	[propagated from UniProtKB/Swiss-Prot (Q9NZJ7.1)][propagated from UniProtKB/Swiss-Prot (Q9NZJ7.1)]
177	2	gi|16445419|ref|NP_005689.2|;gi|16445421|ref|NP_443069.1|	gi|16445419|ref|NP_005689.2|	secretory carrier-associated membrane protein 3 isoform 1 [Homo sapiens]	SCAMP3	4	10	10	4	0	10	15.56	0.00090579	1.23602	3	20	20	3	0	20	14.99	0.00073334	3.71214	4	23	23	4	0	23	15.56	0.00272138	347	38287	7.6	i169-191o196-218i231-253o273-295i	5	0.031	Q	0	1		[131..308]	[SCAMP]	[SCAMP family; pfam04144]	[32][35][41][41][53][53][76][76][83][85][86][171..191][197..217][247..267][277..297]	[phosphorylation][phosphorylation][phosphorylation][phosphorylation][phosphorylation][phosphorylation][phosphorylation][phosphorylation][phosphorylation][phosphorylation][phosphorylation][transmembrane region][transmembrane region][transmembrane region][transmembrane region]	[Phosphoserine; propagated from UniProtKB/Swiss-Prot (O14828.3)][][][Phosphotyrosine; propagated from UniProtKB/Swiss-Prot (O14828.3)][][Phosphotyrosine; propagated from UniProtKB/Swiss-Prot (O14828.3)][][Phosphoserine; propagated from UniProtKB/Swiss-Prot (O14828.3)][][Phosphoserine; propagated from UniProtKB/Swiss-Prot (O14828.3)][][propagated from UniProtKB/Swiss-Prot (O14828.3)][propagated fr…
178	1	gi|4758412|ref|NP_004472.1|	gi|4758412|ref|NP_004472.1|	polypeptide N-acetylgalactosaminyltransferase 2 precursor [Homo sapiens]	GALNT2	1	2	2	1	0	2	3.5	0.00011009	1.23596	2	4	4	2	0	4	6.3	8.913e-05	26.5169	9	33	31	8	2	32.8235	22.24	0.00236016	571	64733	8.4	i7-24o	21	0.796	S	21	1	2.4.1.41	[135..240][139..434][300..362][456..566][456..565]	[Catalytic subdomain A][pp-GalNAc-T][Catalytic subdomain B][RICIN][RICIN]	[propagated from UniProtKB/Swiss-Prot (Q10471.1)][pp-GalNAc-T initiates the formation of mucin-type O-linked glycans; cd02510][propagated from UniProtKB/Swiss-Prot (Q10471.1)][Ricin-type beta-trefoil; smart00458][Ricin-type beta-trefoil; Carbohydrate-binding domain formed from presumed gene triplication. The domain is found in a variety of molecules serving diverse functions such as enzymatic act…	[7..24][order(143..145,147,176,201,204,208,224..226,308..309,][order(224,226,359)][order(458,469,471,479..480,498,509,511,519..520,541,553,][order(480..482,520..522,561..563)][516]	[transmembrane region][other][other][other][other][other]	[propagated from UniProtKB/Swiss-Prot (Q10471.1)][ligand binding site][Mn binding site][putative sugar binding sites [chemical binding]][Q-X-W motif][Not glycosylated; propagated from UniProtKB/Swiss-Prot (Q10471.1)]
179	1	gi|14043026|ref|NP_003752.2|	gi|14043026|ref|NP_003752.2|	vesicle-associated membrane protein 8 [Homo sapiens]	VAMP8	1	2	2	1	0	2	10	0.00062862	1.23576	1	4	4	1	0	4	14	0.00050894	4.0334	3	5	5	3	0	5	24	0.00205287	100	11438	7.4	i77-99o	37	0.022	Q	0	2		[9..81][10..77]	[Synaptobrevin][R-SNARE_VAMP8]	[Synaptobrevin; pfam00957][SNARE motif of VAMP8; cd15868]	[1][order(12..14,16..17,19..24,26..28,30,33..34,36..38,40..45,][33][37][54][55][76..96]	[acetylation][other][other][other][phosphorylation][phosphorylation][transmembrane region]	[N-acetylmethionine. {ECO:0000244|PubMed:19413330, ECO:0000244|PubMed:25944712}; propagated from UniProtKB/Swiss-Prot (Q9BV40.1)][heterotetramer interface [polypeptide binding]][Interaction with STX8. {ECO:0000250|UniProtKB:Q9WUF4}; propagated from UniProtKB/Swiss-Prot (Q9BV40.1)][zero layer][Phosphothreonine. {ECO:0000250|UniProtKB:O70404}; propagated from UniProtKB/Swiss-Prot (Q9BV40.1)][Phosph…
180	5	gi|398774966|ref|NP_001257657.1|;gi|398775599|ref|NP_001257661.1|;gi|398775909|ref|NP_001257663.1|;gi|398777065|ref|NP_001257664.1|;gi|45243501|ref|NP_056182.2|	gi|398774966|ref|NP_001257657.1|	bcl-2-like protein 13 isoform d [Homo sapiens]	BCL2L13	1	2	2	1	0	2	15.22	0.00068328	1.23508	1	4	4	1	0	4	15.22	0.00055319	1.61483	1	2	2	1	0	2	15.22	0.00089255	92	10244	8.2						22		[14..30]	[BH4]	[propagated from UniProtKB/Swiss-Prot (Q9BXK5.1)]	[38]	[phosphorylation]	[Phosphoserine. {ECO:0000244|PubMed:18669648}; propagated from UniProtKB/Swiss-Prot (Q9BXK5.1)]
181	1	gi|5454120|ref|NP_006326.1|	gi|5454120|ref|NP_006326.1|	mitochondrial import inner membrane translocase subunit Tim17-A [Homo sapiens]	TIMM17A	1	1	1	1	0	1	12.87	0.00018381	1.2349	1	2	2	1	0	2	12.87	0.00014881	6.44295	1	4	4	1	0	4	11.7	0.00096041	171	18024	7.9	o111-133i	3	0.193	Q	33	1		[1..171]	[3a0801so1tim17]	[mitochondrial import inner membrane translocase subunit tim17; TIGR00980]	[17..37][63..83][113..133]	[transmembrane region][transmembrane region][transmembrane region]	[propagated from UniProtKB/Swiss-Prot (Q99595.1)][propagated from UniProtKB/Swiss-Prot (Q99595.1)][propagated from UniProtKB/Swiss-Prot (Q99595.1)]
182	1	gi|17105394|ref|NP_000975.2|	gi|17105394|ref|NP_000975.2|	60S ribosomal protein L23a [Homo sapiens]	RPL23A	3	5	5	3	0	5	21.15	0.0010074	1.23407	4	10	10	4	0	10	28.85	0.00081561	0.644608	1	2	2	1	0	2	8.33	0.00052638	156	17695	10.4	o	35	0.017	Q	35	17		[<31..68][36..156][74..156]	[Ribosomal_L23eN][PTZ00191][PRK14548]	[Ribosomal protein L23, N-terminal domain; pfam03939][60S ribosomal protein L23a; Provisional][50S ribosomal protein L23P; Provisional]	[43][45][45]	[phosphorylation][phosphorylation][phosphorylation]	[][][Phosphothreonine; propagated from UniProtKB/Swiss-Prot (P62750.1)]
183	2	gi|213511508|ref|NP_001132929.1|;gi|374253794|ref|NP_001243376.1|	gi|213511508|ref|NP_001132929.1|	B-cell receptor-associated protein 31 isoform a [Homo sapiens]	BCAP31	1	3	3	1	0	3	2.88	0.00030126	1.23361	3	6	6	3	0	6	3.51	0.0002439	5.91393	5	11	11	5	0	11	6.39	0.00144291	313	34752	7.8						X		[68..291]	[Bap31]	[B-cell receptor-associated protein 31-like; pfam05529]
184	1	gi|5902022|ref|NP_008955.1|	gi|5902022|ref|NP_008955.1|	transmembrane protein 115 [Homo sapiens]	TMEM115	1	1	1	1	0	1	6.55	8.955e-05	1.23288	1	2	2	1	0	2	6.55	7.25e-05	4.80822	1	3	3	1	0	3	6.55	0.00035092	351	38197	8.2	i13-35o98-120i127-149o164-183i190-208o223-245i	47	0.595	S	47	3		[1..205][49..151][206..229]	[Mediates homooligomerization. {ECO:0000269|PubMed:24806965}][DUF1751][Mediates localization to the Golgi. {ECO:0000269|PubMed:24806965}]	[propagated from UniProtKB/Swiss-Prot (Q12893.1)][Eukaryotic integral membrane protein (DUF1751); pfam08551][propagated from UniProtKB/Swiss-Prot (Q12893.1)]	[20..40][98..118][127..147][166..186][329]	[transmembrane region][transmembrane region][transmembrane region][transmembrane region][phosphorylation]	[propagated from UniProtKB/Swiss-Prot (Q12893.1)][propagated from UniProtKB/Swiss-Prot (Q12893.1)][propagated from UniProtKB/Swiss-Prot (Q12893.1)][propagated from UniProtKB/Swiss-Prot (Q12893.1)][Phosphothreonine. {ECO:0000244|PubMed:24275569}; propagated from UniProtKB/Swiss-Prot (Q12893.1)]
185	1	gi|4506367|ref|NP_002857.1|	gi|4506367|ref|NP_002857.1|	ras-related protein Rab-3A [Homo sapiens]	RAB3A	1	1	1	1	0	1	7.27	0.00014287	1.23276	1	2	2	1	0	2	7.27	0.00011567	4.82759	2	3	3	2	0	3	12.73	0.00055987	220	24984	5	o	35	0.049	Q	0	19		[22..186][24..183][51..59]	[Rab3][Ras][Effector region (By similarity)]	[Rab GTPase family 3 contains Rab3A, Rab3B, Rab3C and Rab3D; cd01865][Ras family; pfam00071][propagated from UniProtKB/Swiss-Prot (P20336.1)]	[order(22,55,57..59,74,76,83..84,87,91,93..96,125..127,183,][22..24][29..36][order(31..37,47..48,51,53..54,80,135..136,138..139,][order(37..48,51..53)][order(47,52..60)][order(52,56..63,70,72)][54][order(55..56,58,76..77,84,86,88..90)][55..59][72..76][77..80][order(80,82..92)][83..88][91..95][100..105][123..132][135..138][165..167][181..186][218][220][220]	[other][other][other][other][other][other][other][other][other][other][other][other][other][other][other][other][other][other][other][other][modified][methylation][modified]	[effector interaction site][Rab subfamily motif 1 (RabSF1)][G1 box][GTP/Mg2+ binding site [chemical binding]][Rab subfamily motif 2 (RabSF2)][Switch I region][putative GEF interaction site [polypeptide binding]][G2 box][putative GDI interaction site [polypeptide binding]][Rab family motif 1 (RabF1)][Rab family motif 2 (RabF2)][G3 box][Switch II region][Rab family motif 3 (RabF3)][Rab family motif…
186	1	gi|73760405|ref|NP_001027454.1|	gi|73760405|ref|NP_001027454.1|	thymopoietin isoform beta [Homo sapiens]	TMPO	2	2	2	2	0	2	6.83	0.00013846	1.23214	2	4	4	2	0	4	6.83	0.0001121	24.2232	9	30	30	9	0	30	17.4	0.00271304	454	50670	9.4	o411-430i	33	0.022	Q	0	12		[1..410][8..44][49..108][111..>139][138..243][299..371][300..374]	[Nucleoplasmic. {ECO:0000255}][LEM_like][Linker][LEM_LAP2_LEMD1][NAKAP95-binding N][Binds lamins B][NAKAP95-binding C]	[propagated from UniProtKB/Swiss-Prot (P42167.2)][LEM-like domain of lamina-associated polypeptide 2 (LAP2) and similar proteins; cd12935][propagated from UniProtKB/Swiss-Prot (P42167.2)][LEM (Lap2/Emerin/Man1) domain found in lamina-associated polypeptide 2 (LAP2), LEM domain-containing protein 1 (LEMP-1) and similar proteins; cd12940][propagated from UniProtKB/Swiss-Prot (P42167.2)][propagated …	[57][59][66][66][66][67][67][74][74][79][79][order(117..118,130..135,137..138)][154][154][156][156][158][159][159][160][160][164][164][166][168][177][180][180][183][184][207][211][265][292][306][306][312][315][320][362][378][385][389][411..434]	[phosphorylation][phosphorylation][phosphorylation][phosphorylation][phosphorylation][phosphorylation][phosphorylation][phosphorylation][phosphorylation][phosphorylation][phosphorylation][other][phosphorylation][phosphorylation][phosphorylation][phosphorylation][phosphorylation][phosphorylation][phosphorylation][phosphorylation][phosphorylation][phosphorylation][phosphorylation][phosphorylation][…	[Phosphothreonine. {ECO:0000244|PubMed:18669648}; propagated from UniProtKB/Swiss-Prot (P42167.2)][Phosphoserine. {ECO:0000244|PubMed:21406692}; propagated from UniProtKB/Swiss-Prot (P42167.2)][][][Phosphoserine. {ECO:0000244|PubMed:18669648, ECO:0000244|PubMed:19690332, ECO:0000244|PubMed:24275569}; propagated from UniProtKB/Swiss-Prot (P42167.2)][][Phosphoserine. {ECO:0000244|PubMed:18669648, E…
187	1	gi|268840316|ref|NP_001161401.1|	gi|268840316|ref|NP_001161401.1|	interleukin-1 receptor accessory protein isoform 1 precursor [Homo sapiens]	IL1RAP	2	3	3	2	0	3	4.91	0.00016543	1.23134	4	6	6	4	0	6	10.18	0.00013393	1.07463	1	2	2	1	0	2	3.16	0.00014406	570	65419	8.1	i360-382o	21	0.671	S	21	3		[8..334][26..131][157..235][259..347][408..545]	[PHA02785][Ig][Ig][Ig][TIR]	[IL-beta-binding protein; Provisional][Immunoglobulin domain; cl11960][Immunoglobulin domain; cl11960][Immunoglobulin domain; cl11960][TIR domain; pfam01582]	[368..388][557]	[transmembrane region][phosphorylation]	[propagated from UniProtKB/Swiss-Prot (Q9NPH3.2)][Phosphoserine; propagated from UniProtKB/Swiss-Prot (Q9NPH3.2)]
188	3	gi|13904866|ref|NP_000982.2|;gi|209915581|ref|NP_001129606.1|;gi|209915584|ref|NP_001129607.1|	gi|13904866|ref|NP_000982.2|	60S ribosomal protein L28 isoform 2 [Homo sapiens]	RPL28	1	1	1	1	0	1	8.03	0.00022942	1.23118	1	2	2	1	0	2	5.84	0.00018574	6.44624	3	4	4	3	0	4	21.17	0.00119876	137	15747	12	o	16	0.286	Q	16	19	3.6.5.3	[5..117]	[Ribosomal_L28e]	[Ribosomal L28e protein family; pfam01778]	[2][115]	[acetylation][phosphorylation]	[N-acetylserine; propagated from UniProtKB/Swiss-Prot (P46779.3)][Phosphoserine; propagated from UniProtKB/Swiss-Prot (P46779.3)]
189	2	gi|257467652|ref|NP_065961.2|;gi|257467654|ref|NP_001158137.1|	gi|257467652|ref|NP_065961.2|	UPF0606 protein KIAA1549 isoform 1 [Homo sapiens]	KIAA1549	1	1	1	1	0	1	1.09	1.625e-05	1.23077	1	2	2	1	0	2	1.09	1.316e-05	3.23077	1	2	2	1	0	2	1.09	4.246e-05	1934	208909	6.1						7		[1035..1702]	[DUF3827]	[Domain of unknown function (DUF3827); pfam12877]	[998..1018][1299..1319][1388][1395][1554][1555][1622][1624][1643..1644][1749..1750]	[transmembrane region][transmembrane region][phosphorylation][phosphorylation][phosphorylation][phosphorylation][phosphorylation][phosphorylation][other][other]	[propagated from UniProtKB/Swiss-Prot (Q9HCM3.4)][propagated from UniProtKB/Swiss-Prot (Q9HCM3.4)][Phosphoserine. {ECO:0000250|UniProtKB:Q68FD9}; propagated from UniProtKB/Swiss-Prot (Q9HCM3.4)][Phosphoserine. {ECO:0000244|PubMed:17081983}; propagated from UniProtKB/Swiss-Prot (Q9HCM3.4)][Phosphoserine. {ECO:0000250|UniProtKB:Q68FD9}; propagated from UniProtKB/Swiss-Prot (Q9HCM3.4)][Phosphoserine…
190	1	gi|5032131|ref|NP_005810.1|	gi|5032131|ref|NP_005810.1|	syntaxin-6 isoform 1 [Homo sapiens]	STX6	1	1	1	1	0	1	4.31	0.00012326	1.23	1	2	2	1	0	2	4.31	9.979e-05	1.61	1	1	1	1	0	1	8.24	0.00016101	255	29176	4.9	o235-254i	40	0.03	Q	24	1		[5..103][166..231]	[Syntaxin-6_N][SNARE_Syntaxin6]	[Syntaxin 6, N-terminal; pfam09177][SNARE motif of syntaxin 6; cd15851]	[2][2][129][152][order(170..173,175..177,179..181,183..184,186..191,][197][235..255]	[acetylation][phosphorylation][phosphorylation][phosphorylation][other][other][transmembrane region]	[N-acetylserine; propagated from UniProtKB/Swiss-Prot (O43752.1)][Phosphoserine; propagated from UniProtKB/Swiss-Prot (O43752.1)][][Phosphoserine; propagated from UniProtKB/Swiss-Prot (O43752.1)][heterotetramer interface [polypeptide binding]][zero layer][propagated from UniProtKB/Swiss-Prot (O43752.1)]
191	2	gi|283436220|ref|NP_060658.3|;gi|283436222|ref|NP_001164006.1|	gi|283436220|ref|NP_060658.3|	ATPase family AAA domain-containing protein 3A isoform 1 [Homo sapiens]	ATAD3A	3	4	4	3	0	4	7.57	0.0001983	1.22981	4	8	8	4	0	8	7.57	0.00016055	4.82609	4	12	12	4	0	12	8.83	0.00077711	634	71369	9						1		[2..50][42..334][338..353][377..523][394..524]	[Required for interaction with the inner surface of the mitochondrial outer membrane][DUF3523][S100B-binding][AAA][AAA]	[propagated from UniProtKB/Swiss-Prot (Q9NVI7.2)][Domain of unknown function (DUF3523); pfam12037][propagated from UniProtKB/Swiss-Prot (Q9NVI7.2)][The AAA+ (ATPases Associated with a wide variety of cellular Activities) superfamily represents an ancient group of ATPases belonging to the ASCE (for additional strand, catalytic E) division of the P-loop NTPase fold. The ASCE division also includes …	[2][295..312][400..407][order(401..408,459,502)][455..460][514][539]	[acetylation][transmembrane region][other][other][other][other][acetylation]	[N-acetylserine; propagated from UniProtKB/Swiss-Prot (Q9NVI7.2)][propagated from UniProtKB/Swiss-Prot (Q9NVI7.2)][Walker A motif][ATP binding site [chemical binding]][Walker B motif][arginine finger][N6-acetyllysine; propagated from UniProtKB/Swiss-Prot (Q9NVI7.2)]
192	1	gi|40217847|ref|NP_054733.2|	gi|40217847|ref|NP_054733.2|	U5 small nuclear ribonucleoprotein 200 kDa helicase [Homo sapiens]	SNRNP200	3	4	4	3	0	4	2.11	5.886e-05	1.22917	6	8	8	6	0	8	4.4	4.765e-05	1.20833	2	3	3	2	0	3	1.03	5.766e-05	2136	244505	6.1	o	34	0.026	Q	0	2	3.6.4.13	[452..1241][497..655][615..618][684..870][982..1286][1320..1508][1345..1491][1454..1457][1546..1705][1809..2125]	[BRR2][DEXDc][DEIH box][HELICc][Sec63][DEXDc][DEXDc][DEVH box][HELICc][SEC63]	[Replicative superfamily II helicase [Replication, recombination and repair]; COG1204][DEAD-like helicases superfamily. A diverse family of proteins involved in ATP-dependent RNA or DNA unwinding. This domain contains the ATP-binding region; cd00046][propagated from UniProtKB/Swiss-Prot (O75643.2)][Helicase superfamily c-terminal domain; associated with DEXDc-, DEAD-, and DEAH-box proteins, yeast…	[17][26][225][225][225][506..510][615..618][709][order(726..729,786..787,812..814)][756][order(820,851,855,858)][971][1056][1353..1357][1454..1457][order(1564..1567,1621..1622,1647..1649)][order(1655,1686,1690,1693)][1765][2131][2133][2135]	[phosphorylation][phosphorylation][phosphorylation][phosphorylation][phosphorylation][other][other][phosphorylation][other][phosphorylation][other][acetylation][phosphorylation][other][other][other][other][phosphorylation][phosphorylation][phosphorylation][phosphorylation]	[Phosphoserine. {ECO:0000244|PubMed:24275569}; propagated from UniProtKB/Swiss-Prot (O75643.2)][Phosphoserine. {ECO:0000244|PubMed:18669648, ECO:0000244|PubMed:20068231}; propagated from UniProtKB/Swiss-Prot (O75643.2)][][][Phosphoserine. {ECO:0000244|PubMed:17081983, ECO:0000244|PubMed:18318008, ECO:0000244|PubMed:18691976, ECO:0000244|PubMed:19367720, ECO:0000244|PubMed:20068231, ECO:0000244|Pu…
193	1	gi|110224449|ref|NP_598408.1|	gi|110224449|ref|NP_598408.1|	solute carrier family 12 member 6 isoform a [Homo sapiens]	SLC12A6	1	1	1	1	0	1	1.57	2.733e-05	1.22727	2	2	2	2	0	2	3.39	2.213e-05	6.72727	3	5	4	2	1	4.14815	4.17	0.0001481	1150	127617	7.1	o186-208i220-242o252-274i281-303o318-337i344-363o477-499i520-542o557-579i620-637o641-663i683-705o	32	0.065	Q	21	15		[109..1150][209..>360][<515..713][1018..1047]	[2a30][SLC5-6-like_sbd][SLC5-6-like_sbd][KCl_Cotrans_1]	[K-Cl cotransporter; TIGR00930][Solute carrier families 5 and 6-like; solute binding domain; cl00456][Solute carrier families 5 and 6-like; solute binding domain; cl00456][K-Cl Co-transporter type 1 (KCC1); pfam03522]	[32][186..208][224..245][272..295][319..343][347..371][480..501][516..543][558..581][621..644][648..670][677..695][697..719][1032]	[phosphorylation][transmembrane region][transmembrane region][transmembrane region][transmembrane region][transmembrane region][transmembrane region][transmembrane region][transmembrane region][transmembrane region][transmembrane region][transmembrane region][transmembrane region][phosphorylation]	[Phosphoserine. {ECO:0000244|PubMed:19690332}; propagated from UniProtKB/Swiss-Prot (Q9UHW9.2)][propagated from UniProtKB/Swiss-Prot (Q9UHW9.2)][propagated from UniProtKB/Swiss-Prot (Q9UHW9.2)][propagated from UniProtKB/Swiss-Prot (Q9UHW9.2)][propagated from UniProtKB/Swiss-Prot (Q9UHW9.2)][propagated from UniProtKB/Swiss-Prot (Q9UHW9.2)][propagated from UniProtKB/Swiss-Prot (Q9UHW9.2)][propagate…
194	4	gi|32171247|ref|NP_659449.3|;gi|544583471|ref|NP_001269783.1|;gi|544583520|ref|NP_001269781.1|;gi|544583526|ref|NP_001269782.1|	gi|32171247|ref|NP_659449.3|	cyclin-Y isoform 1 [Homo sapiens]	CCNY	1	1	1	1	0	1	4.99	9.217e-05	1.22667	1	2	2	1	0	2	4.99	7.462e-05	1.6	1	1	1	1	0	1	4.99	0.0001204	341	39337	7.2	o	20	0.049	Q	22	10		[169..257]	[CYCLIN]	[Cyclin box fold. Protein binding domain functioning in cell-cycle and transcription control. Present in cyclins, TFIIB and Retinoblastoma (RB).The cyclins consist of 8 classes of cell cycle regulators that regulate cyclin dependent kinases (CDKs). TFIIB...; cd00043]	[25][order(221,225,233,249,252..253)][324][326][326]	[phosphorylation][binding][phosphorylation][phosphorylation][phosphorylation]	[Phosphoserine; propagated from UniProtKB/Swiss-Prot (Q8ND76.2)][binding site 2][][][Phosphoserine; propagated from UniProtKB/Swiss-Prot (Q8ND76.2)]
195	1	gi|38569475|ref|NP_002446.2|	gi|38569475|ref|NP_002446.2|	metaxin-1 isoform 1 [Homo sapiens]		1	1	1	1	0	1	3.22	6.745e-05	1.21818	1	2	2	1	0	2	3.22	5.461e-05	20.8182	2	13	13	2	0	13	5.36	0.00114538	466	51477	9.8	o421-443i	17	0.074	Q	37
196	1	gi|21361933|ref|NP_110417.2|	gi|21361933|ref|NP_110417.2|	T-cell immunomodulatory protein precursor [Homo sapiens]	ITFG1	1	1	1	1	0	1	2.29	5.136e-05	1.21429	1	2	2	1	0	2	2.29	4.158e-05	1.59524	1	1	1	1	0	1	2.29	6.709e-05	612	68108	5.4	i7-29o566-588i	34	0.686	S	34	16		[55..118][258..293]	[VCBS][FG-GAP, atypical]	[Repeat domain in Vibrio, Colwellia, Bradyrhizobium and Shewanella; pfam13517][propagated from UniProtKB/Swiss-Prot (Q8TB96.1)]	[567..587]	[transmembrane region]	[propagated from UniProtKB/Swiss-Prot (Q8TB96.1)]
197	1	gi|4506597|ref|NP_000967.1|	gi|4506597|ref|NP_000967.1|	60S ribosomal protein L12 [Homo sapiens]	RPL12	5	19	19	5	0	19	49.09	0.00361932	1.20353	5	39	39	5	0	39	49.09	0.00300736	0.248088	1	3	3	1	0	3	9.7	0.0007465	165	17819	9.4	o	25	0.064	Q	28	9		[1..165][13..143]	[PLN03072][Ribosomal_L11]	[60S ribosomal protein L12; Provisional][Ribosomal protein L11. Ribosomal protein L11, together with proteins L10 and L7/L12, and 23S rRNA, form the L7/L12 stalk on the surface of the large subunit of the ribosome. The homologous eukaryotic cytoplasmic protein is also called 60S ribosomal...; cd00349]	[order(14,34,76..78,82,90,116,121..123,127,130..131,][order(14,61,63..66,69,71..72,117..118,121..122)][14][order(30,34)][38][38][54][83][order(97,100)]	[other][other][phosphorylation][other][phosphorylation][phosphorylation][acetylation][acetylation][other]	[23S rRNA interface [nucleotide binding]][L7/L12 interface [polypeptide binding]][][putative thiostrepton binding site][][Phosphoserine; propagated from UniProtKB/Swiss-Prot (P30050.1)][N6-acetyllysine; propagated from UniProtKB/Swiss-Prot (P30050.1)][N6-acetyllysine; propagated from UniProtKB/Swiss-Prot (P30050.1)][L25 interface [polypeptide binding]]
198	1	gi|21361416|ref|NP_036382.2|	gi|21361416|ref|NP_036382.2|	ras-related protein R-Ras2 isoform a [Homo sapiens]	RRAS2	5	16	8	4	8	13.8182	33.82	0.00212901	1.2035	6	33	16	4	17	28.3636	38.73	0.00176904	0.0570944	1	1	0	0	1	0.5	7.84	0.00010063	204	23400	6	o	32	0.079	Q	30	11		[13..176][27..204][43..51]	[M_R_Ras_like][PTZ00369][Effector region]	[R-Ras2/TC21, M-Ras/R-Ras3; cd04145][Ras-like protein; Provisional][propagated from UniProtKB/Swiss-Prot (P62070.1)]	[2][21..28][order(22..23,70..71)][order(24..29,41..42,127..128,130,157..158)][order(28..29,43,45,51..52,65..66,68,70..71,159)][order(44..45,49..52)][44..51][46][68..71][70..88][127..130][157..159][186][186]	[acetylation][other][other][other][other][other][other][other][other][other][other][other][phosphorylation][phosphorylation]	[N-acetylalanine; propagated from UniProtKB/Swiss-Prot (P62070.1)][G1 box][putative GDI interaction site [polypeptide binding]][GTP/Mg2+ binding site [chemical binding]][putative GEF interaction site [polypeptide binding]][putative effector interaction site][Switch I region][G2 box][G3 box][Switch II region][G4 box][G5 box][][Phosphoserine; propagated from UniProtKB/Swiss-Prot (P62070.1)]
199	1	gi|5454028|ref|NP_006261.1|	gi|5454028|ref|NP_006261.1|	ras-related protein R-Ras precursor [Homo sapiens]	RRAS	2	11	3	1	8	5.18182	12.84	0.00074711	1.2029	5	23	6	3	17	10.6364	25.23	0.00062079	0.151369	1	1	0	0	1	0.5	7.34	9.417e-05	218	23480	6.9	o	13	0.123	Q	45	19		[28..191][42..192][58..66]	[M_R_Ras_like][Ras][Effector region]	[R-Ras2/TC21, M-Ras/R-Ras3; cd04145][Ras family; pfam00071][]	[36..43][order(37..38,85..86)][order(39..44,56..57,142..143,145,172..173)][order(43..44,58,60,66..67,80..81,83,85..86,174)][order(59..60,64..67)][59..66][61][66][83..86][85..103][142..145][172..174][215]	[other][other][other][other][other][other][other][phosphorylation][other][other][other][other][modified]	[G1 box][putative GDI interaction site [polypeptide binding]][GTP/Mg2+ binding site [chemical binding]][putative GEF interaction site [polypeptide binding]][putative effector interaction site][Switch I region][G2 box][][G3 box][Switch II region][G4 box][G5 box][prenylation site]
200	1	gi|40254924|ref|NP_060979.2|	gi|40254924|ref|NP_060979.2|	leucine-rich repeat-containing protein 59 [Homo sapiens]	LRRC59	7	44	44	7	0	44	24.1	0.00450476	1.19464	7	91	91	7	0	91	21.17	0.00377145	3.61734	8	102	102	8	0	102	21.17	0.0136412	307	34930	9.6	o244-266i	37	0.025	Q	0	17		[10..31][19..74][19..40][40..62][41..63][42..79][62..120][62..102][63..84][64..86][86..>120][86..107][87..109][109..128][<159..219]	[LRR 1][LRR_8][leucine-rich repeat][LRR 2][leucine-rich repeat][LRR_4][LRR_8][LRR_4][LRR 3][leucine-rich repeat][LRR_4][LRR 4][leucine-rich repeat][LRR 5][DUF1682]	[propagated from UniProtKB/Swiss-Prot (Q96AG4.1)][Leucine rich repeat; pfam13855][leucine-rich repeat [structural motif]][propagated from UniProtKB/Swiss-Prot (Q96AG4.1)][leucine-rich repeat [structural motif]][Leucine Rich repeats (2 copies); pfam12799][Leucine rich repeat; pfam13855][Leucine Rich repeats (2 copies); pfam12799][propagated from UniProtKB/Swiss-Prot (Q96AG4.1)][leucine-rich repeat…	[1][23][25][73][135][245..265]	[acetylation][phosphorylation][phosphorylation][modified][acetylation][transmembrane region]	[N-acetylmethionine. {ECO:0000244|PubMed:22814378, ECO:0000244|PubMed:25944712}; propagated from UniProtKB/Swiss-Prot (Q96AG4.1)][Phosphoserine. {ECO:0000244|PubMed:18669648, ECO:0000244|PubMed:24275569}; propagated from UniProtKB/Swiss-Prot (Q96AG4.1)][Phosphoserine. {ECO:0000244|PubMed:18669648}; propagated from UniProtKB/Swiss-Prot (Q96AG4.1)][N6-succinyllysine. {ECO:0000250|UniProtKB:Q922Q8};…
201	1	gi|45827806|ref|NP_056274.3|	gi|45827806|ref|NP_056274.3|	atlastin-3 [Homo sapiens]	ATL3	3	12	12	3	0	12	9.61	0.00069717	1.18537	3	25	25	3	0	25	8.87	0.00058796	2.58163	4	20	20	4	0	20	11.65	0.00151783	541	60542	5.7	o444-466i468-490o	10	0.086	Q	19	11		[56..303]	[GBP]	[Guanylate-binding protein (GBP) family (N-terminal domain); cd01851]	[67..74][order(69..75,108..110,115..116,145,213..214,268)][order(105..110,115..122)][116][142..145][order(144..148,158..164,167..169)][213..216][266..268][391][446..466][468..488][535]	[other][other][other][other][other][other][other][other][acetylation][transmembrane region][transmembrane region][phosphorylation]	[G1 box][GTP/Mg2+ binding site [chemical binding]][Switch I region][G2 box][G3 box][Switch II region][G4 box][G5 box][N6-acetyllysine. {ECO:0000244|PubMed:19608861}; propagated from UniProtKB/Swiss-Prot (Q6DD88.1)][propagated from UniProtKB/Swiss-Prot (Q6DD88.1)][propagated from UniProtKB/Swiss-Prot (Q6DD88.1)][Phosphoserine. {ECO:0000244|PubMed:17081983}; propagated from UniProtKB/Swiss-Prot (Q6…
202	2	gi|209413738|ref|NP_001129243.1|;gi|35493916|ref|NP_002942.2|	gi|209413738|ref|NP_001129243.1|	dolichyl-diphosphooligosaccharide--protein glycosyltransferase subunit 2 isoform 2 precursor [Homo sapiens]	RPN2	2	9	9	2	0	9	4.39	0.00045997	1.17048	3	19	19	3	0	19	7.15	0.00039308	14.6081	6	86	86	6	0	86	14.47	0.00574136	615	67723	6.1						20	2.4.99.18	[2..596]	[Ribophorin_II]	[Oligosaccharyltransferase subunit Ribophorin II; pfam05817]
203	4	gi|559098406|ref|NP_001273960.1|;gi|559098408|ref|NP_001273961.1|;gi|559098453|ref|NP_001273962.1|;gi|7305503|ref|NP_038470.1|	gi|559098406|ref|NP_001273960.1|	stomatin-like protein 2, mitochondrial isoform b [Homo sapiens]	STOML2	3	8	8	3	0	8	15.76	0.00080851	1.16403	4	17	17	4	0	17	19.29	0.00069549	0.569784	1	3	3	1	0	3	6.75	0.00039605	311	33337	8.2						9		[41..269][74..>147]	[HflC][SPFH_paraslipin]	[Regulator of protease activity HflC, stomatin/prohibitin superfamily [Posttranslational modification, protein turnover, chaperones]; COG0330][Paraslipin or slipin-2 (SLP-2, a subgroup of the stomatin-like proteins (slipins) family; belonging to the SPFH (stomatin, prohibitin, flotillin, and HflK/C) superfamily; cd08829]
204	1	gi|91208426|ref|NP_006436.3|	gi|91208426|ref|NP_006436.3|	pre-mRNA-processing-splicing factor 8 [Homo sapiens]	PRPF8	6	8	8	6	0	8	5.35	0.00010769	1.16129	7	17	17	7	0	17	5.31	9.263e-05	1.69892	3	9	9	3	0	9	2.27	0.00015825	2335	273599	8.8	o	21	0.074	Q	27	17		[1..2335][58..209][393..801][812..1303][986..1079][1208..1343][1304..1577][1442..1601][1513..1526][1581..1752][1669..2034][1766..2016][1767..2020][2067..2317][2301..2335]	[PRP8][PRO8NT][PROCN][Reverse transcriptase homology domain][RRM_4][U5_2-snRNA_bdg][Linker][U6-snRNA_bdg][Important for branch point selection (By similarity)][Restriction endonuclease homology domain][Involved in interaction with pre-mRNA 5' splice site][RNase_H_like_Prp8_IV][RNase H homology domain][MPN_PRP8][Required for interaction with EFTUD2 and SNRNP200]	[U5 snRNP spliceosome subunit [RNA processing and modification]; COG5178][PRO8NT (NUC069), PrP8 N-terminal domain; pfam08082][PROCN (NUC071) domain; pfam08083][propagated from UniProtKB/Swiss-Prot (Q6P2Q9.2)][RNA recognition motif of the spliceosomal PrP8; pfam10598][U5-snRNA binding site 2 of PrP8; pfam10597][propagated from UniProtKB/Swiss-Prot (Q6P2Q9.2)][U6-snRNA interacting domain of PrP8; p…	[2][859][1463][order(1781..1782,1864)][2042][2064]	[acetylation][phosphorylation][acetylation][active][phosphorylation][phosphorylation]	[N-acetylalanine; propagated from UniProtKB/Swiss-Prot (Q6P2Q9.2)][Phosphoserine; propagated from UniProtKB/Swiss-Prot (Q6P2Q9.2)][N6-acetyllysine; propagated from UniProtKB/Swiss-Prot (Q6P2Q9.2)][][][]
205	3	gi|21327685|ref|NP_647473.1|;gi|359718987|ref|NP_001240795.1|;gi|7657689|ref|NP_055078.1|	gi|21327685|ref|NP_647473.1|	ATP-dependent zinc metalloprotease YME1L1 isoform 1 [Homo sapiens]	YME1L1	4	8	8	4	0	8	8.67	0.00032529	1.16071	4	17	17	4	0	17	8.54	0.00027982	6.26071	8	33	33	8	0	33	16.17	0.00175277	773	86455	8.8	o	23	0.206	Q	23	10		[333..766][342..505][588..764]	[FtsH_fam][AAA][Peptidase_M41]	[ATP-dependent metalloprotease FtsH; TIGR01241][The AAA+ (ATPases Associated with a wide variety of cellular Activities) superfamily represents an ancient group of ATPases belonging to the ASCE (for additional strand, catalytic E) division of the P-loop NTPase fold. The ASCE division also includes ABC; cd00009][Peptidase family M41; pfam01434]	[296..316][379..386][order(380..387,438,483)][434..439][497]	[transmembrane region][other][other][other][other]	[propagated from UniProtKB/Swiss-Prot (Q96TA2.2)][Walker A motif][ATP binding site [chemical binding]][Walker B motif][arginine finger]
206	1	gi|164519076|ref|NP_055557.2|	gi|164519076|ref|NP_055557.2|	transmembrane 9 superfamily member 4 precursor [Homo sapiens]	TM9SF4	3	7	7	3	0	7	4.83	0.00034271	1.15488	2	15	15	2	0	15	3.58	0.00029728	2.367	6	11	11	6	0	11	10.28	0.00070348	642	74519	6.5	i7-29o280-302i346-368o378-400i413-435o450-472i500-522o532-554i567-589o604-626i	24	0.903	S	24	20		[54..600]	[EMP70]	[Endomembrane protein 70; pfam02990]	[282..302][312][347..367][377..397][417..437][450..470][502..522][536..556][571..591][599..619]	[transmembrane region][phosphorylation][transmembrane region][transmembrane region][transmembrane region][transmembrane region][transmembrane region][transmembrane region][transmembrane region][transmembrane region]	[propagated from UniProtKB/Swiss-Prot (Q92544.2)][Phosphotyrosine. {ECO:0000244|PubMed:18088087}; propagated from UniProtKB/Swiss-Prot (Q92544.2)][propagated from UniProtKB/Swiss-Prot (Q92544.2)][propagated from UniProtKB/Swiss-Prot (Q92544.2)][propagated from UniProtKB/Swiss-Prot (Q92544.2)][propagated from UniProtKB/Swiss-Prot (Q92544.2)][propagated from UniProtKB/Swiss-Prot (Q92544.2)][propaga…
207	1	gi|4506743|ref|NP_001003.1|	gi|4506743|ref|NP_001003.1|	40S ribosomal protein S8 [Homo sapiens]	RPS8	5	12	12	5	0	12	25	0.00181332	1.14025	7	26	26	7	0	26	38.46	0.00159043	0.744654	3	6	6	3	0	6	19.23	0.00118435	208	24205	10.3	o	4	0.06	Q	0	1		[1..206][5..190]	[PTZ00148][Ribosomal_S8e_like]	[40S ribosomal protein S8; Provisional][Eukaryotic/archaeal ribosomal protein S8e and similar proteins; cd11380]	[order(5,7..12,15..19,21..24,27,29..34,41..45,47..50,52,][order(83,85,188)]	[other][other]	[18S rRNA binding interface [nucleotide binding]][S11 protein interface [polypeptide binding]]
208	1	gi|51100974|ref|NP_056009.1|	gi|51100974|ref|NP_056009.1|	unconventional myosin-Id [Homo sapiens]	MYO1D	5	12	12	5	0	12	8.85	0.00037492	1.13982	11	26	26	11	0	26	16.2	0.00032884	0.12462	1	1	1	1	0	1	2.78	4.081e-05	1006	116202	9.4	o	30	0.054	Q	0	17		[4..694][24..682][802..1005]	[MYSc][MYSc_Myo1][Myosin_TH1]	[Myosin. Large ATPases; smart00242][class I myosin, motor domain; cd01378][Myosin tail; pfam06017]	[2][order(50..53,58,102..109,151..161,383..388)][order(50..53,58)][102..109][151..161][200][383..388][order(412..423,426..433,435)][536][614..624][order(626..652,669..682)]	[acetylation][other][other][other][other][phosphorylation][other][other][phosphorylation][other][other]	[N-acetylalanine. {ECO:0000269|Ref.4}; propagated from UniProtKB/Swiss-Prot (O94832.2)][ATP binding site [chemical binding]][purine-binding loop][P-loop][switch I region][Phosphoserine. {ECO:0000244|PubMed:18669648}; propagated from UniProtKB/Swiss-Prot (O94832.2)][switch II region][relay loop][Phosphotyrosine. {ECO:0000250|UniProtKB:Q5SYD0}; propagated from UniProtKB/Swiss-Prot (O94832.2)][SH1 h…
209	1	gi|431822408|ref|NP_001258901.1|	gi|431822408|ref|NP_001258901.1|	heat shock protein HSP 90-beta isoform c [Homo sapiens]	HSP90AB1	15	64	53	10	11	61.1498	29.13	0.00269187	1.13971	23	145	105	14	40	132.556	39.22	0.00236214	0.0245555	1	1	1	1	0	1	2.1	5.75e-05	714	82320	5.1						6		[14..714][37..175][181..714][710..714]	[PTZ00272][HATPase_c][HSP90][TPR repeat-binding]	[heat shock protein 83 kDa (Hsp83); Provisional][Histidine kinase-like ATPases; This family includes several ATP-binding proteins for example: histidine kinase, DNA gyrase B, topoisomerases, heat shock protein HSP90, phytochrome-like ATPases and DNA mismatch repair proteins; cd00075][Hsp90 protein; pfam00183][propagated from UniProtKB/Swiss-Prot (P08238.4)]	[order(42,46,49,86,88,90,92..93,120..123,157,163,168..169,][46][order(90,92,120,122)][209][216][245][251][287][295][297][389][425][435][442][471][474][521][522][567][580][614][659][708]	[other][other][other][modified][phosphorylation][phosphorylation][phosphorylation][phosphorylation][phosphorylation][phosphorylation][modified][acetylation][phosphorylation][phosphorylation][acetylation][phosphorylation][modified][phosphorylation][modified][nitrosylation][acetylation][phosphorylation][phosphorylation]	[ATP binding site [chemical binding]][Mg2+ binding site [ion binding]][G-X-G motif][N6-succinyllysine. {ECO:0000250|UniProtKB:P11499}; propagated from UniProtKB/Swiss-Prot (P08238.4)][Phosphoserine. {ECO:0000244|PubMed:18088087, ECO:0000244|PubMed:18318008, ECO:0000244|PubMed:20068231, ECO:0000244|PubMed:21406692}; propagated from UniProtKB/Swiss-Prot (P08238.4)][Phosphoserine. {ECO:0000244|PubMe…
210	1	gi|91807125|ref|NP_001035109.1|	gi|91807125|ref|NP_001035109.1|	protein FAM3C precursor [Homo sapiens]	FAM3C	3	5	5	3	0	5	16.3	0.00069231	1.12156	3	11	11	3	0	11	21.15	0.00061656	4.10373	5	14	14	5	0	14	28.63	0.00253217	227	24680	8.3	i7-29o	25	0.738	S	25	7		[53..223]	[ILEI_FAM3C]	[Interleukin-like EMT inducer; cd13940]	[170][171][174]	[phosphorylation][phosphorylation][phosphorylation]
211	1	gi|19923262|ref|NP_004153.2|	gi|19923262|ref|NP_004153.2|	ras-related protein Rab-5A [Homo sapiens]	RAB5A	4	10	4	2	6	6	23.26	0.00087714	1.11153	5	23	10	2	13	13.3333	27.44	0.00078905	5.11787	5	24	20	4	4	21.1429	38.14	0.00403754	215	23659	8.1	o	37	0.121	Q	33	3		[20..182][22..183][49..57]	[Rab5_related][Ras][Effector region. {ECO:0000250}]	[Rab-related GTPase family includes Rab5 and Rab22; regulates early endosome fusion; cd01860][Ras family; pfam00071][propagated from UniProtKB/Swiss-Prot (P20339.2)]	[20..22][27..34][order(29..35,45..46,51..52,78,133..134,136,163..165)][order(35..46,50..51)][order(45,50..58)][order(50,54..61,68,70)][52][order(53..54,56,74..75,82,84,86..88)][53..57][order(55..57,59,81,88..89)][70..74][75..78][order(78,80..90)][81..86][89..90][98..103][125..130][133..136][163..165][179..181][212][213]	[other][other][other][other][other][other][other][other][other][other][other][other][other][other][other][other][other][other][other][other][modified][modified]	[Rab subfamily motif 1 (RabSF1)][G1 box][GTP/Mg2+ binding site [chemical binding]][Rab subfamily motif 2 (RabSF2)][Switch I region][putative GEF interaction site [polypeptide binding]][G2 box][putative GDI interaction site [polypeptide binding]][Rab family motif 1 (RabF1)][effector interaction site][Rab family motif 2 (RabF2)][G3 box][Switch II region][Rab family motif 3 (RabF3)][Rab family motif…
212	3	gi|15826840|ref|NP_002812.2|;gi|22902130|ref|NP_690621.1|;gi|393715082|ref|NP_001257327.1|	gi|15826840|ref|NP_002812.2|	inactive tyrosine-protein kinase 7 isoform a precursor [Homo sapiens]	PTK7	4	9	9	4	0	9	6.36	0.00026437	1.10924	5	20	20	5	0	20	6.54	0.00023782	0.159664	1	1	1	1	0	1	1.59	3.837e-05	1070	118392	7.1	i13-35o704-726i	31	0.835	S	31	6	2.7.10.1	[45..105][49..112][144..207][146..222][231..>301][242..302][329..401][340..398][412..498][414..498][503..588][520..585][598..681][611..669][790..1063][794..1070][801..1061]	[IGc2][Ig][IGc2][Ig2_PTK7][IG][Ig][Ig][IGc2][I-set][Ig][I-set][Ig][IG_like][Ig][PTK_CCK4][Interaction with CTNNB1][STYKc]	[Immunoglobulin C-2 Type; smart00408][Immunoglobulin domain; cd00096][Immunoglobulin C-2 Type; smart00408][Second immunoglobulin (Ig)-like domain of protein tyrosine kinase (PTK) 7, also known as CCK4; cd05760][Immunoglobulin; smart00409][Immunoglobulin domain; cd00096][Immunoglobulin domain; cl11960][Immunoglobulin C-2 Type; smart00408][Immunoglobulin I-set domain; pfam07679][Immunoglobulin doma…	[621..622][705..725]	[cleavage][transmembrane region]	[Cleavage, by MMP14; propagated from UniProtKB/Swiss-Prot (Q13308.2)][propagated from UniProtKB/Swiss-Prot (Q13308.2)]
213	1	gi|48255945|ref|NP_001673.2|	gi|48255945|ref|NP_001673.2|	plasma membrane calcium-transporting ATPase 1 isoform 1b [Homo sapiens]	ATP2B1	16	42	42	16	0	42	17.95	0.00108205	1.10408	21	94	94	21	0	94	25.49	0.00098033	1.03061	13	30	30	13	0	30	15.82	0.00100961	1220	134685	5.9	o377-399i419-441o855-877i931-950o970-989i1002-1024o1039-1061i	3	0.049	Q	0	12	3.6.3.8	[15..1064][51..121][170..465][525..611][<681..806][880..1058][1103..1166]	[ATPase-IIB_Ca][Cation_ATPase_N][E1-E2_ATPase][Hydrolase_like2][HAD][Cation_ATPase_C][ATP_Ca_trans_C]	[plasma-membrane calcium-translocating P-type ATPase; TIGR01517][Cation transporter/ATPase, N-terminus; pfam00690][E1-E2 ATPase; pfam00122][Putative hydrolase of sodium-potassium ATPase alpha subunit; pfam13246][haloacid dehalogenase-like hydrolase; pfam12710][Cation transporting ATPase, C-terminus; pfam00689][Plasma membrane calcium transporter ATPase C terminal; pfam12424]	[708][1116][1129][1140][1155][1178][1182][1211]	[other][phosphorylation][phosphorylation][phosphorylation][phosphorylation][phosphorylation][phosphorylation][phosphorylation]	[motif II][][][][][][][]
214	2	gi|4504747|ref|NP_002195.1|;gi|6006011|ref|NP_005492.1|	gi|4504747|ref|NP_002195.1|	integrin alpha-3 isoform a precursor [Homo sapiens]	ITGA3	3	4	4	3	0	4	3.52	0.00011962	1.10092	3	9	9	3	0	9	3.52	0.00010895	0.715596	1	2	2	1	0	2	0.86	7.813e-05	1051	116612	6.8	i13-35o992-1014i	33	0.619	S	33	17		[38..103][48..108][110..171][185..236][237..293][<279..326][294..354][304..352][356..411][365..417][415..477][430..481][462..859][1015..1021][1017..1021]	[FG-GAP 1][Int_alpha][FG-GAP 2][FG-GAP 3][FG-GAP 4][VCBS][FG-GAP 5][Int_alpha][FG-GAP 6][Int_alpha][FG-GAP 7][Int_alpha][Integrin_alpha2][Interaction with HPS5][GFFKR motif]	[propagated from UniProtKB/Swiss-Prot (P26006.5)][Integrin alpha (beta-propellor repeats); smart00191][propagated from UniProtKB/Swiss-Prot (P26006.5)][propagated from UniProtKB/Swiss-Prot (P26006.5)][propagated from UniProtKB/Swiss-Prot (P26006.5)][Repeat domain in Vibrio, Colwellia, Bradyrhizobium and Shewanella; pfam13517][propagated from UniProtKB/Swiss-Prot (P26006.5)][Integrin alpha (beta-p…	[992..1014][1051]	[transmembrane region][phosphorylation]	[propagated from UniProtKB/Swiss-Prot (P26006.5)][]
215	1	gi|58331222|ref|NP_001010986.1|	gi|58331222|ref|NP_001010986.1|	probable phospholipid-transporting ATPase IG isoform b [Homo sapiens]	ATP11C	2	4	4	2	0	4	3.75	0.00011235	1.09804	3	9	9	3	0	9	4.02	0.00010233	1.79412	2	5	5	2	0	5	2.06	0.00018346	1119	128122	6.4	o294-316i347-366o906-928i960-982o992-1014i1026-1048o1068-1090i	16	0.055	Q	16	X	3.6.3.1	[43..1091][98..>323][470..575][<601..677][<814..843][970..1091]	[ATPase-Plipid][E1-E2_ATPase][Hydrolase_like2][PI-PLCc_GDPD_SF][HAD_like][DUF2269]	[phospholipid-translocating P-type ATPase, flippase; TIGR01652][E1-E2 ATPase; pfam00122][Putative hydrolase of sodium-potassium ATPase alpha subunit; pfam13246][Catalytic domain of phosphoinositide-specific phospholipase C-like phosphodiesterases superfamily; cl14615][Haloacid Dehalogenase-like Hydrolases; cl21460][Predicted integral membrane protein (DUF2269); cl02335]	[67..85][87..107][291..311][347..367][445][445][880..900][909..929][956..976][996..1016][1027..1047][1070..1090]	[transmembrane region][transmembrane region][transmembrane region][transmembrane region][phosphorylation][phosphorylation][transmembrane region][transmembrane region][transmembrane region][transmembrane region][transmembrane region][transmembrane region]	[propagated from UniProtKB/Swiss-Prot (Q8NB49.3)][propagated from UniProtKB/Swiss-Prot (Q8NB49.3)][propagated from UniProtKB/Swiss-Prot (Q8NB49.3)][propagated from UniProtKB/Swiss-Prot (Q8NB49.3)][][Phosphoserine. {ECO:0000244|PubMed:18669648}; propagated from UniProtKB/Swiss-Prot (Q8NB49.3)][propagated from UniProtKB/Swiss-Prot (Q8NB49.3)][propagated from UniProtKB/Swiss-Prot (Q8NB49.3)][propaga…
216	4	gi|336176064|ref|NP_001229528.1|;gi|336176066|ref|NP_001229529.1|;gi|35493811|ref|NP_909122.1|;gi|4757926|ref|NP_004893.1|	gi|336176064|ref|NP_001229528.1|	RNA-binding protein 39 isoform c [Homo sapiens]	RBM39	2	4	4	2	0	4	5.51	0.00024749	1.09778	3	9	9	3	0	9	8.46	0.00022542	1.79556	3	5	5	3	0	5	7.87	0.00040411	508	57090	10						20		[46..496][130..214][230..302][317..420][401..485]	[SF-CC1][RRM1_RBM23][RRM2_RBM23_RBM39][RBM39linker][RRM3_RBM39_like]	[splicing factor, CC1-like family; TIGR01622][RNA recognition motif 1 in vertebrate probable RNA-binding protein 23 (RBM23); cd12537][RNA recognition motif 2 in vertebrate RNA-binding protein RBM23, RBM39 and similar proteins; cd12284][linker between RRM2 and RRM3 domains in RBM39 protein; pfam15519][RNA recognition motif 3 in vertebrate RNA-binding protein 39 (RBM39) and similar proteins; cd1228…
217	1	gi|45504382|ref|NP_079495.1|	gi|45504382|ref|NP_079495.1|	dnaJ homolog subfamily C member 5 [Homo sapiens]	DNAJC5	3	8	8	3	0	8	16.16	0.00126994	1.09767	4	18	18	4	0	18	33.33	0.00115668	1.07519	2	6	6	2	0	6	19.7	0.00124416	198	22149	5.1	o108-130i	29	0.052	Q	22	20		[15..>84][17..69]	[DnaJ][DnaJ]	[DnaJ-class molecular chaperone with C-terminal Zn finger domain [Posttranslational modification, protein turnover, chaperones]; COG0484][DnaJ domain or J-domain. DnaJ/Hsp40 (heat shock protein 40) proteins are highly conserved and play crucial roles in protein translation, folding, unfolding, translocation, and degradation. They act primarily by stimulating the ATPase activity of Hsp70s; cd06257]	[8][10][10][10][12][15][order(43..45,54,57..58,61..62)][56][151]	[phosphorylation][phosphorylation][phosphorylation][phosphorylation][phosphorylation][phosphorylation][other][acetylation][phosphorylation]	[Phosphoserine. {ECO:0000244|PubMed:20068231, ECO:0000244|PubMed:21406692}; propagated from UniProtKB/Swiss-Prot (Q9H3Z4.1)][][][Phosphoserine. {ECO:0000244|PubMed:18669648, ECO:0000244|PubMed:20068231, ECO:0000244|PubMed:21406692, ECO:0000269|PubMed:14997482}; propagated from UniProtKB/Swiss-Prot (Q9H3Z4.1)][Phosphoserine. {ECO:0000250|UniProtKB:P60905}; propagated from UniProtKB/Swiss-Prot (Q9H…
218	1	gi|19718759|ref|NP_579899.1|	gi|19718759|ref|NP_579899.1|	myoferlin isoform b [Homo sapiens]	MYOF	36	231	230	35	1	230.958	21.83	0.00354455	1.09684	50	521	507	49	14	520.169	27.93	0.00323162	1.11448	36	180	177	35	3	179.695	21.24	0.00360245	2048	233474	6.2	o2013-2035i	19	0.042	Q	19	10		[5..136][186..281][196..305][282..353][359..522][663..728][755..830][843..901][914..970][1126..1259][1314..>1390][1541..1664][1777..1908]	[C2A_Ferlin][Necessary for interaction with EHD2][C2B_Ferlin][FerI][C2C_Ferlin][FerA][FerB][DysFN][DysFN][C2D_Ferlin][C2][C2E_Ferlin][C2F_Ferlin]	[C2 domain first repeat in Ferlin; cd08373][propagated from UniProtKB/Swiss-Prot (Q9NZM1.1)][C2 domain second repeat in Ferlin; cd04011][FerI (NUC094) domain; pfam08151][C2 domain third repeat in Ferlin; cd04018][FerA (NUC095) domain; pfam08165][FerB (NUC096) domain; pfam08150][Dysferlin domain, N-terminal region; smart00693][Dysferlin domain, N-terminal region; smart00693][C2 domain fourth repea…	[174][174][order(390,396,444,446,458,460)][458][871][order(1142,1148,1204,1206)][order(1556,1562,1611,1613,1618)][1803][1902][1902][1932][2013..2033]	[phosphorylation][phosphorylation][other][phosphorylation][acetylation][other][other][phosphorylation][phosphorylation][phosphorylation][phosphorylation][transmembrane region]	[][Phosphoserine; propagated from UniProtKB/Swiss-Prot (Q9NZM1.1)][Ca2+ binding site [ion binding]][][N6-acetyllysine; propagated from UniProtKB/Swiss-Prot (Q9NZM1.1)][putative Ca2+ binding site [ion binding]][Ca2+ binding site [ion binding]][][][Phosphoserine; propagated from UniProtKB/Swiss-Prot (Q9NZM1.1)][][propagated from UniProtKB/Swiss-Prot (Q9NZM1.1)]
219	1	gi|134142337|ref|NP_004987.2|	gi|134142337|ref|NP_004987.2|	multidrug resistance-associated protein 1 [Homo sapiens]	ABCC1	3	8	8	3	0	8	3.4	0.00016424	1.09333	5	18	18	5	0	18	4.64	0.00014959	1.60667	5	9	9	5	0	9	4.18	0.00024136	1531	171590	7.1	o36-58i75-92o102-124i131-153o173-192i321-343o363-385i437-459o463-485i549-571o591-613i969-991o1022-1044i1097-1119o1198-1220i1225-1247o	49	0.162	A	52	16		[7..1530][325..596][644..845][972..1244][1291..1511]	[MRP_assoc_pro][ABC_membrane][ABCC_MRP_domain1][ABC_membrane][ABCC_MRP_domain2]	[multi drug resistance-associated protein (MRP); TIGR00957][ABC transporter transmembrane region; pfam00664][ATP-binding cassette domain 1 of multidrug resistance-associated protein, subfamily C; cd03250][ABC transporter transmembrane region; pfam00664][ATP-binding cassette domain 2 of multidrug resistance-associated protein; cd03244]	[19][23][34..54][75..95][101..121][134..154][173..193][277][289][317..337][364..384][441..461][465..485][503][548..568][591..611][678..685][order(681..682,684..686,713,792..793,827)][710..713][768..777][788..793][796..799][823..829][905][915][930][968..988][1006][1026..1046][1090..1110][1112..1132][1204..1224][1227..1247]	[glycosylation][glycosylation][transmembrane region][transmembrane region][transmembrane region][transmembrane region][transmembrane region][phosphorylation][phosphorylation][transmembrane region][transmembrane region][transmembrane region][transmembrane region][modified][transmembrane region][transmembrane region][other][other][other][other][other][other][other][phosphorylation][phosphorylation]…	[][][propagated from UniProtKB/Swiss-Prot (P33527.3)][propagated from UniProtKB/Swiss-Prot (P33527.3)][propagated from UniProtKB/Swiss-Prot (P33527.3)][propagated from UniProtKB/Swiss-Prot (P33527.3)][propagated from UniProtKB/Swiss-Prot (P33527.3)][Phosphotyrosine. {ECO:0000250|UniProtKB:O35379}; propagated from UniProtKB/Swiss-Prot (P33527.3)][Phosphoserine. {ECO:0000250|UniProtKB:O35379}; prop…
220	1	gi|213688375|ref|NP_001135417.1|	gi|213688375|ref|NP_001135417.1|	actin, aortic smooth muscle [Homo sapiens]	ACTA2	17	408	17	2	391	164.358	62.07	0.0137027	1.0884	17	902	31	2	871	373.05	54.91	0.0125901	0.0129468	3	7	0	0	7	1.5	13.26	0.00016336	377	42009	5.4	o	39	0.033	Q	22	10		[5..377][10..183]	[Actin][NBD_sugar-kinase_HSP70_actin]	[Actin; pfam00022][Nucleotide-Binding Domain of the sugar kinase/HSP70/actin superfamily; cd00012]	[3][order(13..16,18,20,139,156..159)][46][49][75][86]	[acetylation][other][sulfatation][sulfatation][methylation][methylation]	[N-acetylglutamate. {ECO:0000244|PubMed:22223895}; propagated from UniProtKB/Swiss-Prot (P62736.1)][nucleotide binding site [chemical binding]][Methionine (R)-sulfoxide. {ECO:0000250}; propagated from UniProtKB/Swiss-Prot (P62736.1)][Methionine (R)-sulfoxide. {ECO:0000250}; propagated from UniProtKB/Swiss-Prot (P62736.1)][Tele-methylhistidine. {ECO:0000250|UniProtKB:P62739}; propagated from UniPr…
221	4	gi|22095331|ref|NP_055862.1|;gi|406719586|ref|NP_001258356.1|;gi|406719588|ref|NP_001258357.1|;gi|406719590|ref|NP_001258358.1|	gi|22095331|ref|NP_055862.1|	ER membrane protein complex subunit 1 isoform 1 precursor [Homo sapiens]	EMC1	3	7	7	3	0	7	4.03	0.00022157	1.08293	8	16	16	8	0	16	10.37	0.00020501	2.41951	6	12	12	6	0	12	7.05	0.00049616	993	111759	7.7	o	22	0.885	S	22	1		[28..242][786..992]	[PQQ_2][DUF1620]	[PQQ-like domain; pfam13360][Protein of unknown function (DUF1620); pfam07774]	[959..979]	[transmembrane region]	[propagated from UniProtKB/Swiss-Prot (Q8N766.1)]
222	1	gi|18104948|ref|NP_000973.2|	gi|18104948|ref|NP_000973.2|	60S ribosomal protein L21 [Homo sapiens]	RPL21	2	7	7	2	0	7	18.13	0.0013751	1.08097	2	16	16	2	0	16	18.13	0.00127235	0.202044	1	1	1	1	0	1	11.25	0.00025661	160	18565	10.5	i	31	0.098	Q	38	13	3.6.5.3	[1..160][2..100]	[PTZ00189][Ribosomal_L21e]	[60S ribosomal protein L21; Provisional][Ribosomal protein L21e; pfam01157]
223	1	gi|223890243|ref|NP_006004.2|	gi|223890243|ref|NP_006004.2|	60S ribosomal protein L10 isoform a [Homo sapiens]		5	20	20	5	0	20	24.3	0.00293747	1.07386	4	46	46	4	0	46	24.3	0.00273495	0.280439	2	4	4	2	0	4	18.69	0.00076743	214	24604	10.1	o	9	0.069	Q	0
224	1	gi|261878575|ref|NP_001159897.1|	gi|261878575|ref|NP_001159897.1|	guanine nucleotide-binding protein G(i) subunit alpha-2 isoform 2 [Homo sapiens]	GNAI2	9	41	37	6	4	39.4759	34.28	0.00390178	1.07198	10	94	85	7	9	90.9635	37.74	0.00363953	0.132967	3	4	3	2	1	3.75	12.58	0.00048417	318	36465	5.6						3		[3..316][3..312]	[G_alpha][G-alpha]	[G protein alpha subunit; smart00275][Alpha subunit of G proteins (guanine nucleotide binding); cd00066]	[order(3,8..10,145,164,167,233..234,236,289..290)][3..10][order(4..6,34,38,42,45,48..49,67,70,113,142,167,175,179)][140..148][145][order(146,148,150,161,163,167..169,171,174..175,177..180)][order(148,173,176..177,180)][164..167][165..181][233..236][order(281..292,294..297)][289..291]	[other][other][other][other][other][other][other][other][other][other][other][other]	[GTP/Mg2+ binding site [chemical binding]][G1 box][GoLoco binding site][Switch I region][G2 box][beta - gamma complex interaction site [polypeptide binding]][adenylyl cyclase interaction site [polypeptide binding]][G3 box][Switch II region][G4 box][putative receptor binding site][G5 box]
225	1	gi|316659409|ref|NP_001186883.1|	gi|316659409|ref|NP_001186883.1|	actin, cytoplasmic 2 [Homo sapiens]	ACTG1	18	1026	773	9	253	1020.64	62.93	0.085546	1.07167	18	2362	1834	8	528	2352.7	62.67	0.0798254	0.00959599	3	7	3	2	4	7	14.67	0.0007664	375	41793	5.5	o	37	0.036	Q	20	17		[3..375][8..181]	[Actin][NBD_sugar-kinase_HSP70_actin]	[Actin; pfam00022][Nucleotide-Binding Domain of the sugar kinase/HSP70/actin superfamily; cd00012]	[1][2][order(11..14,16,18,137,154..157)][44][47][73][84]	[acetylation][acetylation][other][sulfatation][sulfatation][methylation][methylation]	[N-acetylmethionine. {ECO:0000244|PubMed:22223895, ECO:0000244|PubMed:22814378}; propagated from UniProtKB/Swiss-Prot (P63261.1)][N-acetylglutamate, in Actin, cytoplasmic 2, N-terminally processed, partial. {ECO:0000244|PubMed:19413330, ECO:0000244|PubMed:22223895, ECO:0000244|PubMed:22814378, ECO:0000244|PubMed:25944712, ECO:0000269|Ref.7, ECO:0000269|Ref.8}; propagated from UniProtKB/Swiss-Prot…
226	1	gi|4759300|ref|NP_004772.1|	gi|4759300|ref|NP_004772.1|	vesicle-associated membrane protein 3 [Homo sapiens]	VAMP3	3	10	5	1	5	10	40	0.0031431	1.0647	4	25	16	2	9	23.2	41	0.00295184	1.39092	3	14	5	1	9	10	40	0.00410574	100	11309	8.8	i79-98o	9	0.057	Q	16	1		[11..>81][13..75]	[Synaptobrevin][R-SNARE_VAMP2]	[Synaptobrevin; pfam00957][SNARE motif of VAMP2; cd15870]	[2][order(14..16,18..19,21..26,28..30,32,35..36,38..40,42..47,][39][78..98]	[acetylation][other][other][transmembrane region]	[N-acetylserine. {ECO:0000244|PubMed:22814378, ECO:0000244|PubMed:25944712}; propagated from UniProtKB/Swiss-Prot (Q15836.3)][heterotetramer interface [polypeptide binding]][zero layer][propagated from UniProtKB/Swiss-Prot (Q15836.3)]
227	1	gi|4503471|ref|NP_001393.1|	gi|4503471|ref|NP_001393.1|	elongation factor 1-alpha 1 [Homo sapiens]	EEF1A1	8	34	34	8	0	34	34.42	0.0023131	1.06296	9	79	79	9	0	79	32.9	0.00217566	0.163143	3	4	4	3	0	4	10.61	0.00035548	462	50141	9	o	24	0.057	Q	19	6		[1..460][9..238][242..332][335..438]	[PTZ00141][EF1_alpha][EF1_alpha_II][EF1_alpha_III]	[elongation factor 1- alpha; Provisional][Elongation Factor 1-alpha (EF1-alpha) protein family; cd01883][EF1_alpha_II: this family represents the domain II of elongation factor 1-alpha (EF-1a) that is found in archaea and all eukaryotic lineages. EF-1A is very abundant in the cytosol, where it is involved in the GTP-dependent binding of aminoacyl-tRNAs to...; cd03693][Domain III of EF-1; cd03705]	[14..21][order(15,17,21..22,25,28..29,76..77,95..96,119..120,169,][order(17,19..22,153..154,156,194..196)][order(21,64,67..68,70,72,74..76,78,89,91,93..95,97,100)][55][66..76][72][86][91..94][93..111][153..156][165][194..196][234][300][301][order(349..352,355..356,360,362,371,392..393,395,427..430)][order(351..352,355..357,369,392..393,408,429..430)][374][411][430][432][432]	[other][other][other][other][methylation][other][other][phosphorylation][other][other][other][methylation][other][modified][phosphorylation][phosphorylation][other][other][phosphorylation][modified][other][phosphorylation][phosphorylation]	[G1 box][putative GEF interaction site [polypeptide binding]][GTP/Mg2+ binding site [chemical binding]][EF1Balpha binding site [polypeptide binding]][N6,N6-dimethyllysine; propagated from UniProtKB/Swiss-Prot (P68104.1)][Switch I region][G2 box][][G3 box][Switch II region][G4 box][N6,N6-dimethyllysine, alternate; propagated from UniProtKB/Swiss-Prot (P68104.1)][G5 box][S-nitrosylation site][Phosp…
228	2	gi|374253823|ref|NP_001243390.1|;gi|4506975|ref|NP_001037.1|	gi|374253823|ref|NP_001243390.1|	solute carrier family 12 member 2 isoform 2 [Homo sapiens]	SLC12A2	8	15	15	8	0	15	8.03	0.0003942	1.05914	12	35	35	12	0	35	12.46	0.00037234	2.21505	10	24	24	10	0	24	10.03	0.00082389	1196	129679	6.5						5		[201..267][216..1196]	[AA_permease_N][2a30]	[Amino acid permease N-terminal; pfam08403][K-Cl cotransporter; TIGR00930]	[1][77][79][266][286..306][319..341][367..387][411..431][436..456][487..507][521..541][592..612][655..675][681..699][725..745][900..920][940][944][978]	[acetylation][phosphorylation][phosphorylation][phosphorylation][transmembrane region][transmembrane region][transmembrane region][transmembrane region][transmembrane region][transmembrane region][transmembrane region][transmembrane region][transmembrane region][transmembrane region][transmembrane region][transmembrane region][phosphorylation][phosphorylation][phosphorylation]	[N-acetylmethionine. {ECO:0000244|PubMed:22223895}; propagated from UniProtKB/Swiss-Prot (P55011.1)][Phosphoserine. {ECO:0000244|PubMed:18669648}; propagated from UniProtKB/Swiss-Prot (P55011.1)][Phosphoserine. {ECO:0000244|PubMed:18669648}; propagated from UniProtKB/Swiss-Prot (P55011.1)][Phosphothreonine. {ECO:0000250|UniProtKB:P55012}; propagated from UniProtKB/Swiss-Prot (P55011.1)][propagate…
229	1	gi|4506609|ref|NP_000972.1|	gi|4506609|ref|NP_000972.1|	60S ribosomal protein L19 [Homo sapiens]	RPL19	3	12	12	3	0	12	13.78	0.00192434	1.05831	3	28	28	3	0	28	13.78	0.00181764	1.84378	4	16	16	4	0	16	14.29	0.00335162	196	23466	11.5	o	25	0.168	Q	25	17		[4..167]	[Ribosomal_L19e_E]	[Ribosomal protein L19e, eukaryotic. L19e is found in the large ribosomal subunit of eukaryotes and archaea. L19e is distinct from the ribosomal subunit L19, which is found in prokaryotes. It consists of two small globular domains connected by an...; cd01417]	[order(4,8..9,18..24,26,29,38,42,53,55..60,62,64,66..67,][13][28..47][order(112..113,115..119,139..149)][187]	[other][phosphorylation][other][other][phosphorylation]	[protein-rRNA interface [nucleotide binding]][Phosphoserine; propagated from UniProtKB/Swiss-Prot (P84098.1)][putative translocon docking site][putative intersubunit bridge][Phosphothreonine; propagated from UniProtKB/Swiss-Prot (P84098.1)]
230	1	gi|354459354|ref|NP_001238850.1|	gi|354459354|ref|NP_001238850.1|	ras-related protein Rap-1b isoform 3 [Homo sapiens]	RAP1B	6	40	40	6	0	40	41.21	0.00761963	1.05118	8	94	93	7	1	94	45.45	0.00724852	0.17161	1	5	5	1	0	5	7.27	0.00124416	165	18778	8.5						12		[3..148][5..148]	[P-loop_NTPase][Ras]	[P-loop containing Nucleoside Triphosphate Hydrolases; cl21455][Ras family; pfam00071]	[10..17][order(12..18,97..98,100,128..130)][35][38..40][57..58][97..100][128..130]	[other][other][other][other][other][other][other]	[G1 box][GTP/Mg2+ binding site [chemical binding]][G2 box][Switch I region][Switch II region][G4 box][G5 box]
231	1	gi|15451856|ref|NP_001744.2|	gi|15451856|ref|NP_001744.2|	caveolin-1 isoform alpha [Homo sapiens]	CAV1	5	35	35	5	0	35	30.34	0.00618024	1.04163	5	83	83	5	0	83	30.34	0.00593285	2.52705	4	65	65	4	0	65	30.34	0.0149929	178	20472	6	i97-119o	10	0.032	Q	0	7		[34..177]	[Caveolin]	[Caveolin; pfam01146]	[2][2][5][6][6][9][14][14][25][37][37][80][88][88][156][168]	[acetylation][phosphorylation][acetylation][phosphorylation][phosphorylation][phosphorylation][phosphorylation][phosphorylation][phosphorylation][phosphorylation][phosphorylation][phosphorylation][phosphorylation][phosphorylation][modified][phosphorylation]	[N-acetylserine. {ECO:0000244|PubMed:22814378, ECO:0000269|PubMed:15219854}; propagated from UniProtKB/Swiss-Prot (Q03135.4)][Phosphoserine. {ECO:0000250|UniProtKB:P41350}; propagated from UniProtKB/Swiss-Prot (Q03135.4)][N6-acetyllysine. {ECO:0000244|PubMed:19608861}; propagated from UniProtKB/Swiss-Prot (Q03135.4)][][Phosphotyrosine. {ECO:0000269|PubMed:8632005}; propagated from UniProtKB/Swiss…
232	1	gi|15431306|ref|NP_150644.1|	gi|15431306|ref|NP_150644.1|	60S ribosomal protein L8 [Homo sapiens]	RPL8	3	8	8	3	0	8	22.96	0.0009784	1.03932	5	19	19	5	0	19	26.46	0.00094065	1.35813	4	8	8	4	0	8	14.01	0.00127805	257	28025	11	o	27	0.075	Q	27	8		[1..254][11..90][96..230]	[PTZ00180][Ribosomal_L2][Ribosomal_L2_C]	[60S ribosomal protein L8; Provisional][Ribosomal Proteins L2, RNA binding domain; pfam00181][Ribosomal Proteins L2, C-terminal domain; pfam03947]	[133][216]	[phosphorylation][hydroxylation]	[][(3S)-3-hydroxyhistidine. {ECO:0000269|PubMed:23103944}; propagated from UniProtKB/Swiss-Prot (P62917.2)]
233	3	gi|284448551|ref|NP_001165131.1|;gi|284448553|ref|NP_001165132.1|;gi|4503327|ref|NP_000389.1|	gi|284448551|ref|NP_001165131.1|	NADH-cytochrome b5 reductase 3 isoform 3 [Homo sapiens]	CYB5R3	2	5	5	2	0	5	11.38	0.00047052	1.03063	2	12	12	2	0	12	9.28	0.00045713	1.88184	4	7	7	4	0	7	17.66	0.00086048	334	38226	6.9						22	1.6.2.2	[44..334][78..334]	[PTZ00319][cyt_b5_reduct_like]	[NADH-cytochrome B5 reductase; Provisional][Cytochrome b5 reductase catalyzes the reduction of 2 molecules of cytochrome b5 using NADH as an electron donor. Like ferredoxin reductases, these proteins have an N-terminal FAD binding subdomain and a C-terminal NADH binding subdomain, separated by a...; cd06183]	[order(111,125..128,142..144,146,157..161,215,218..219,334)][order(125,127..128)][order(144,146,215..216,242..244,273,285,308..312)][order(158,161,164,170,178,180)][order(210,214..217,219)]	[other][other][other][other][other]	[FAD binding pocket [chemical binding]][FAD binding motif [chemical binding]][NAD binding pocket [chemical binding]][phosphate binding motif [ion binding]][beta-alpha-beta structure motif]
234	1	gi|4506625|ref|NP_000981.1|	gi|4506625|ref|NP_000981.1|	60S ribosomal protein L27a [Homo sapiens]	RPL27A	2	5	5	2	0	5	14.86	0.00106186	1.02907	4	12	12	4	0	12	20.95	0.00103163	2.15019	3	8	8	3	0	8	15.54	0.00221932	148	16561	11	i	21	0.074	Q	24	11		[1..148]	[PTZ00160]	[60S ribosomal protein L27a; Provisional]	[39][47][55][68][110]	[hydroxylation][acetylation][acetylation][phosphorylation][acetylation]	[(3S)-3-hydroxyhistidine; propagated from UniProtKB/Swiss-Prot (P46776.2)][N6-acetyllysine; propagated from UniProtKB/Swiss-Prot (P46776.2)][N6-acetyllysine; propagated from UniProtKB/Swiss-Prot (P46776.2)][Phosphoserine; propagated from UniProtKB/Swiss-Prot (P46776.2)][N6-acetyllysine; propagated from UniProtKB/Swiss-Prot (P46776.2)]
235	1	gi|4502101|ref|NP_000691.1|	gi|4502101|ref|NP_000691.1|	annexin A1 [Homo sapiens]	ANXA1	4	9	9	4	0	9	13.58	0.00081757	1.01112	6	22	22	6	0	22	19.94	0.00080901	0.440049	2	3	3	2	0	3	6.36	0.00035599	346	38714	7	o	3	0.253	Q	20	9		[47..111][51..111][118..183][123..183][202..267][207..267][277..342][282..342]	[Annexin][Annexin 1][Annexin][Annexin 2][Annexin][Annexin 3][Annexin][Annexin 4]	[Annexin; pfam00191][propagated from UniProtKB/Swiss-Prot (P04083.2)][Annexin; pfam00191][propagated from UniProtKB/Swiss-Prot (P04083.2)][Annexin; pfam00191][propagated from UniProtKB/Swiss-Prot (P04083.2)][Annexin; pfam00191][propagated from UniProtKB/Swiss-Prot (P04083.2)]	[2][5][5][21][21][24][27][27][37][39][58][207][207][216][239][312]	[acetylation][phosphorylation][phosphorylation][phosphorylation][phosphorylation][phosphorylation][phosphorylation][phosphorylation][phosphorylation][phosphorylation][acetylation][phosphorylation][phosphorylation][phosphorylation][acetylation][acetylation]	[N-acetylalanine. {ECO:0000269|PubMed:3303336}; propagated from UniProtKB/Swiss-Prot (P04083.2)][][Phosphoserine, by TRPM7. {ECO:0000269|PubMed:15485879}; propagated from UniProtKB/Swiss-Prot (P04083.2)][][Phosphotyrosine, by EGFR. {ECO:0000269|PubMed:2457390}; propagated from UniProtKB/Swiss-Prot (P04083.2)][Phosphothreonine; propagated from UniProtKB/Swiss-Prot (P04083.2)][][Phosphoserine, by P…
236	1	gi|54607135|ref|NP_055635.3|	gi|54607135|ref|NP_055635.3|	mitochondrial import receptor subunit TOM70 [Homo sapiens]	TOMM70	9	18	18	9	0	18	22.04	0.00093052	1.01086	11	44	44	11	0	44	25	0.00092078	6.45277	17	88	88	17	0	88	36.18	0.00594252	608	67455	7.1	i7-29o39-61i	56	0.149	S	21	3		[41..601][114..147][114..146][114..142][152..182][153..186][294..327][329..362][329..357][362..396][367..400][401..434][401..429][435..470][440..475][476..509][476..504][509..540][511..544][545..578][545..572]	[3a0801s09][TPR 1][TPR_1][TPR repeat][TPR repeat][TPR 2][TPR 3][TPR 4][TPR repeat][TPR repeat][TPR 5][TPR 6][TPR repeat][TPR repeat][TPR 7][TPR 8][TPR repeat][TPR repeat][TPR 9][TPR 10][TPR repeat]	[mitochondrial precursor proteins import receptor (72 kDa mitochondrial outermembrane protein) (mitochondrial import receptor for the ADP/ATP carrier) (translocase of outermembrane tom70); TIGR00990][propagated from UniProtKB/Swiss-Prot (O94826.1)][Tetratricopeptide repeat; pfam00515][TPR repeat [structural motif]][TPR repeat [structural motif]][propagated from UniProtKB/Swiss-Prot (O94826.1)][pr…	[2][39..59][85][91][91][96][96][110][order(115,118..119,122..123,125,154,157..158,161..162,][185][order(330,333..334,337..338,340,368,371..372,375..376,][order(477,480..481,484..485,487,511,514..515,518..519,]	[acetylation][transmembrane region][phosphorylation][phosphorylation][phosphorylation][phosphorylation][phosphorylation][phosphorylation][other][acetylation][other][other]	[N-acetylalanine. {ECO:0000244|PubMed:19413330, ECO:0000244|PubMed:22223895, ECO:0000244|PubMed:22814378, ECO:0000244|PubMed:25944712}; propagated from UniProtKB/Swiss-Prot (O94826.1)][propagated from UniProtKB/Swiss-Prot (O94826.1)][][][Phosphoserine. {ECO:0000244|PubMed:18088087, ECO:0000244|PubMed:18669648, ECO:0000244|PubMed:20068231, ECO:0000244|PubMed:21406692, ECO:0000244|PubMed:24275569};…
237	1	gi|66933005|ref|NP_001019820.1|	gi|66933005|ref|NP_001019820.1|	calnexin precursor [Homo sapiens]	CANX	4	18	18	4	0	18	8.28	0.00095567	1.01057	7	44	44	7	0	44	13.34	0.00094566	10.1903	12	139	139	12	0	139	18.58	0.00964017	592	67568	4.6	o483-505i	21	0.843	S	21	5		[69..440][276..409][278..345][326..359][348..405][503..592]	[Calreticulin][P domain (Extended arm) (By similarity)][4 X approximate repeats][Interaction with PPIB (By similarity)][4 X approximate repeats][Sufficient to mediate interaction with SGIP1 (By similarity)]	[Calreticulin family; pfam00262][propagated from UniProtKB/Swiss-Prot (P27824.2)][propagated from UniProtKB/Swiss-Prot (P27824.2)][propagated from UniProtKB/Swiss-Prot (P27824.2)][propagated from UniProtKB/Swiss-Prot (P27824.2)][propagated from UniProtKB/Swiss-Prot (P27824.2)]	[137][482..502][554][554][562][562][564][564][583][583][583]	[acetylation][transmembrane region][phosphorylation][phosphorylation][phosphorylation][phosphorylation][phosphorylation][phosphorylation][phosphorylation][phosphorylation][phosphorylation]	[N6-acetyllysine; propagated from UniProtKB/Swiss-Prot (P27824.2)][propagated from UniProtKB/Swiss-Prot (P27824.2)][][Phosphoserine; propagated from UniProtKB/Swiss-Prot (P27824.2)][][Phosphothreonine; propagated from UniProtKB/Swiss-Prot (P27824.2)][][Phosphoserine, by MAPK3; propagated from UniProtKB/Swiss-Prot (P27824.2)][][][Phosphoserine; propagated from UniProtKB/Swiss-Prot (P27824.2)]
238	1	gi|34147513|ref|NP_004628.4|	gi|34147513|ref|NP_004628.4|	ras-related protein Rab-7a [Homo sapiens]	RAB7A	10	51	51	10	0	51	67.63	0.00774386	0.999871	11	126	126	11	0	126	59.42	0.00774472	4.14874	14	162	162	14	0	162	72.46	0.0321319	207	23490	6.7	o	23	0.345	Q	21	3		[9..179][10..175][37..45]	[Rab7][Ras][Effector region (By similarity)]	[Rab GTPase family 7 (Rab7); cd01862][Ras family; pfam00071][propagated from UniProtKB/Swiss-Prot (P51149.1)]	[9..10][15..22][order(17..23,33,35,40,66,125..126,128,155..157)][order(17,42,44..45,63,67,69..72,75..76,79)][order(23..34,36..39)][order(33,38..46)][order(38,42..49,56,58)][40][order(41,43..45,60,62,69..70,73,77,79..82,173)][41..45][58..62][63..66][order(66,68..78)][69..74][72][77..81][86..91][117..122][125..128][155..157][171..179][183][205][207]	[other][other][other][other][other][other][other][other][other][other][other][other][other][other][phosphorylation][other][other][other][other][other][other][phosphorylation][modified][modified]	[Rab subfamily motif 1 (RabSF1)][G1 box][GTP/Mg2+ binding site [chemical binding]][GDI interaction site][Rab subfamily motif 2 (RabSF2)][Switch I region][putative GEF interaction site [polypeptide binding]][G2 box][putative effector interaction site][Rab family motif 1 (RabF1)][Rab family motif 2 (RabF2)][G3 box][Switch II region][Rab family motif 3 (RabF3)][Phosphoserine; propagated from UniProt…
239	1	gi|127139033|ref|NP_000932.3|	gi|127139033|ref|NP_000932.3|	NADPH--cytochrome P450 reductase [Homo sapiens]	POR	8	23	23	8	0	23	13.09	0.00106311	0.996251	10	57	57	10	0	57	17.65	0.00106653	0.113402	2	2	2	2	0	2	5	0.00012076	680	77048	5.6	i23-45o	43	0.172	Q	21	7	1.6.2.4	[55..679][85..222][280..679]	[CysJ][Flavodoxin_1][CYPOR]	[Sulfite reductase, alpha subunit (flavoprotein) [Inorganic ion transport and metabolism]; COG0369][Flavodoxin; pfam00258][NADPH cytochrome p450 reductase (CYPOR) serves as an electron donor in several oxygenase systems and is a component of nitric oxide synthases and methionine synthase reductases. CYPOR transfers two electrons from NADPH to the heme of cytochrome p450 via...; cd06204]	[order(301,477,479,537..538,569..570,599..600,605,607,609,][order(322,457..460,475..477,491..494,679)][order(457,459..460)][order(460,632,677,679)][order(491,494,497)][order(533,537..540,542)]	[other][other][other][active][other][other]	[NADP binding pocket [chemical binding]][FAD binding pocket [chemical binding]][FAD binding motif [chemical binding]][catalytic residues [active]][phosphate binding motif [ion binding]][beta-alpha-beta structure motif]
240	1	gi|282165814|ref|NP_057124.3|	gi|282165814|ref|NP_057124.3|	transmembrane emp24 domain-containing protein 5 isoform 1 precursor [Homo sapiens]	TMED5	2	2	2	2	0	2	9.17	0.00027451	0.989209	2	5	5	2	0	5	9.17	0.0002778	5.15827	2	8	8	2	0	8	9.61	0.00143432	229	26005	4.8						1		[35..222]	[EMP24_GP25L]	[emp24/gp25L/p24 family/GOLD; pfam01105]	[197..217]	[transmembrane region]	[propagated from UniProtKB/Swiss-Prot (Q9Y3A6.1)]
241	1	gi|66879664|ref|NP_001019399.1|	gi|66879664|ref|NP_001019399.1|	ADP-ribosylation factor 1 [Homo sapiens]	ARF1	2	4	4	2	0	4	16.02	0.00069461	0.98862	4	12	5	2	7	10	33.7	0.00070295	0.108108	1	1	0	0	1	0.333333	6.08	7.561e-05	181	20697	6.8	o	30	0.178	Q	30	1		[13..>139][18..176]	[Gem1][Arf1_5_like]	[GTPase SAR1 family domain [General function prediction only]; COG1100][ADP-ribosylation factor-1 (Arf1) and ADP-ribosylation factor-5 (Arf5); cd04150]	[2][2][24..31][order(26..32,126..127,129,159..161)][order(26..27,31,35,47..54,76,81)][36..51][order(48..52,57,67,71,73,77,79..81)][48][order(49..51,73,80)][51..66][67..70][69..86][126..129][159..161]	[myristoylation][acetylation][other][other][other][other][other][other][other][other][other][other][other][other]	[][N-acetylglycine, alternate. {ECO:0000244|PubMed:19413330, ECO:0000244|PubMed:22223895}; propagated from UniProtKB/Swiss-Prot (P84077.2)][G1 box][GTP/Mg2+ binding site [chemical binding]][putative GAP interaction site [polypeptide binding]][Switch I region][GEF interaction site [polypeptide binding]][G2 box][effector interaction site][interswitch region][G3 box][Switch II region][G4 box][G5 box]
242	1	gi|72534712|ref|NP_001026881.1|	gi|72534712|ref|NP_001026881.1|	endoplasmic reticulum-Golgi intermediate compartment protein 1 [Homo sapiens]	ERGIC1	2	4	4	2	0	4	8.28	0.00043353	0.98861	4	10	10	4	0	10	14.83	0.00043874	2.2574	3	7	7	3	0	7	11.38	0.00099104	290	32592	7.1	o20-42i248-270o	47	0.322	A	47	5		[5..98][<109..271]	[ERGIC_N][COPIIcoated_ERV]	[Endoplasmic Reticulum-Golgi Intermediate Compartment (ERGIC); pfam13850][Endoplasmic reticulum vesicle transporter; pfam07970]	[27..47][255..275]	[transmembrane region][transmembrane region]	[propagated from UniProtKB/Swiss-Prot (Q969X5.1)][propagated from UniProtKB/Swiss-Prot (Q969X5.1)]
243	2	gi|556695460|ref|NP_001273349.1|;gi|7705997|ref|NP_057538.1|	gi|556695460|ref|NP_001273349.1|	ER membrane protein complex subunit 4 isoform b [Homo sapiens]	EMC4	1	2	2	1	0	2	10.74	0.00042189	0.98829	2	5	5	2	0	5	19.46	0.00042696	4.51756	3	7	7	3	0	7	26.17	0.00192887	149	16745	10.1						15		[53..>118]	[DUF1077]	[Protein of unknown function (DUF1077); pfam06417]	[2][84..104]	[acetylation][transmembrane region]	[N-acetylthreonine. {ECO:0000269|PubMed:22223895, ECO:0000269|PubMed:22814378}; propagated from UniProtKB/Swiss-Prot (Q5J8M3.2)][propagated from UniProtKB/Swiss-Prot (Q5J8M3.2)]
244	2	gi|6005926|ref|NP_009210.1|;gi|60279268|ref|NP_001012496.1|	gi|6005926|ref|NP_009210.1|	splicing factor U2AF 65 kDa subunit isoform a [Homo sapiens]	U2AF2	3	6	6	3	0	6	11.58	0.00039702	0.987562	4	15	15	4	0	15	14.53	0.00040179	0.430348	2	2	2	2	0	2	6.53	0.00017287	475	53501	9.1	o	37	0.011	Q	0	19		[148..229][150..226][259..335][260..332][375..461][400..460]	[RRM1_U2AF65][RRM][RRM2_U2AF65][RRM][RRM3_U2AF65][RRM]	[RNA recognition motif 1 found in U2 large nuclear ribonucleoprotein auxiliary factor U2AF 65 kDa subunit (U2AF65) and similar proteins; cd12230][RNA recognition motif; smart00360][RNA recognition motif 2 found in U2 large nuclear ribonucleoprotein auxiliary factor U2AF 65 kDa subunit (U2AF65) and similar proteins; cd12231][RNA recognition motif; smart00360][RNA recognition motif 3 found in U2 la…	[2][2][2][15][53][55][70][79][79][order(150,152,155,195..197,199,225,227..229)][276][order(380,383,393..394,396..398,400..402,404..405,449,]	[phosphorylation][acetylation][phosphorylation][hydroxylation][phosphorylation][phosphorylation][acetylation][phosphorylation][phosphorylation][other][hydroxylation][other]	[][N-acetylserine; propagated from UniProtKB/Swiss-Prot (P26368.4)][Phosphoserine; propagated from UniProtKB/Swiss-Prot (P26368.4)][5-hydroxylysine, by JMJD6; propagated from UniProtKB/Swiss-Prot (P26368.4)][][][N6-acetyllysine; propagated from UniProtKB/Swiss-Prot (P26368.4)][][Phosphoserine; propagated from UniProtKB/Swiss-Prot (P26368.4)][RNA binding site [nucleotide binding]][5-hydroxylysine,…
245	1	gi|15088795|ref|NP_149975.1|	gi|15088795|ref|NP_149975.1|	GPI transamidase component PIG-S [Homo sapiens]	PIGS	1	2	2	1	0	2	3.78	0.00011326	0.982609	1	5	5	1	0	5	3.78	0.00011463	7.07826	3	11	11	3	0	11	9.37	0.00081375	555	61656	6.5	i19-36o520-542i	32	0.469	S	32	17		[21..550]	[PIG-S]	[Phosphatidylinositol-glycan biosynthesis class S protein; pfam10510]	[19..39][521..541]	[transmembrane region][transmembrane region]	[propagated from UniProtKB/Swiss-Prot (Q96S52.3)][propagated from UniProtKB/Swiss-Prot (Q96S52.3)]
246	1	gi|24431935|ref|NP_065393.1|	gi|24431935|ref|NP_065393.1|	reticulon-4 isoform A [Homo sapiens]	RTN4	2	4	4	2	0	4	2.52	0.00010547	0.981308	3	10	10	3	0	10	3.36	0.00010674	15.4486	2	48	48	2	0	48	2.18	0.00165332	1192	129931	4.5	o1026-1048i1126-1148o	23	0.018	Q	0	2		[1005..1175]	[Reticulon]	[Reticulon; pfam02453]	[1][7][7][11][13][15][15][107][107][152][181][181][182][184][184][188][196][361][446][450][511][749][858][860][863][881][1019..1039][1104][1134..1154]	[acetylation][phosphorylation][phosphorylation][phosphorylation][phosphorylation][phosphorylation][phosphorylation][phosphorylation][phosphorylation][phosphorylation][phosphorylation][phosphorylation][phosphorylation][phosphorylation][phosphorylation][phosphorylation][phosphorylation][phosphorylation][phosphorylation][phosphorylation][phosphorylation][phosphorylation][phosphorylation][phosphoryla…	[N-acetylmethionine. {ECO:0000244|PubMed:19369195, ECO:0000244|PubMed:19413330, ECO:0000244|PubMed:20068231, ECO:0000244|PubMed:21406692, ECO:0000244|PubMed:22223895, ECO:0000244|PubMed:22814378, ECO:0000244|PubMed:25944712, ECO:0000269|Ref.16}; propagated from UniProtKB/Swiss-Prot (Q9NQC3.2)][][Phosphoserine. {ECO:0000244|PubMed:17081983, ECO:0000244|PubMed:20068231}; propagated from UniProtKB/S…
247	8	gi|18105048|ref|NP_542160.1|;gi|20336752|ref|NP_619790.1|;gi|21396484|ref|NP_003514.2|;gi|238624110|ref|NP_001154806.1|;gi|4504259|ref|NP_003510.1|;gi|4504261|ref|NP_003511.1|;gi|4504263|ref|NP_003512.1|;gi|4504269|ref|NP_003515.1|	gi|18105048|ref|NP_542160.1|	histone H2B type 1-K [Homo sapiens]	HIST1H2BK	4	64	64	4	0	64	30.95	0.0159649	0.975915	4	162	162	4	0	162	25.4	0.0163587	0.497952	2	25	25	2	0	25	19.84	0.00814631	126	13890	10.3	o	8	0.023	Q	52	6		[28..124]	[H2B]	[Histone H2B; smart00427]	[2][6][6][12][12][13][13][15][16][16][17][17][21][21][24][24][35][37][47][58][80][86][86][87][93][109][116][117]	[acetylation][acetylation][modified][acetylation][modified][acetylation][modified][phosphorylation][acetylation][modified][acetylation][modified][acetylation][modified][acetylation][modified][modified][phosphorylation][methylation][methylation][methylation][methylation][acetylation][methylation][methylation][methylation][phosphorylation][methylation]	[N-acetylproline. {ECO:0000250|UniProtKB:P23527}; propagated from UniProtKB/Swiss-Prot (O60814.3)][N6-acetyllysine, alternate. {ECO:0000269|PubMed:16283522, ECO:0000269|PubMed:16627869}; propagated from UniProtKB/Swiss-Prot (O60814.3)][N6-crotonyllysine, alternate. {ECO:0000269|PubMed:21925322}; propagated from UniProtKB/Swiss-Prot (O60814.3)][N6-acetyllysine, alternate. {ECO:0000269|PubMed:16627…
248	1	gi|55743130|ref|NP_001007075.1|	gi|55743130|ref|NP_001007075.1|	60S ribosomal protein L32 [Homo sapiens]	RPL32	3	7	7	3	0	7	28.15	0.00162975	0.961085	3	18	18	3	0	18	28.15	0.00169646	1.97229	3	11	11	3	0	11	27.41	0.00334542	135	15860	11.3	o	11	0.047	Q	0	3		[18..124]	[Ribosomal_L32_L32e]	[Ribosomal_L32_L32e: L32 is a protein from the large subunit that contains a surface-exposed globular domain and a finger-like projection that extends into the RNA core to stabilize the tertiary structure. L32 does not appear to play a role in forming the...; cd00513]	[order(18..20,22..24,26..31,34..37,39..44,46..52,56..62,64,]	[other]	[23S rRNA interface [nucleotide binding]]
249	1	gi|124494247|ref|NP_001074419.1|	gi|124494247|ref|NP_001074419.1|	unconventional myosin-Ic isoform b [Homo sapiens]	MYO1C	20	71	71	20	0	71	23.66	0.00213755	0.958744	26	183	183	26	0	183	29.98	0.00223026	0.387892	9	22	22	9	0	22	12.84	0.00086519	1044	119628	9.5	o	24	0.079	Q	23	17		[24..712][43..699][737..757][854..1040]	[MYSc][MYSc_Myo1][IQ][Myosin_TH1]	[Myosin. Large ATPases; smart00242][class I myosin, motor domain; cd01378][Calmodulin-binding motif; smart00015][Myosin tail; pfam06017]	[order(69..72,77,121..128,168..178,402..407)][order(69..72,77)][121..128][168..178][389][402..407][order(431..442,445..452,454)][631..641][order(643..669,686..699)]	[other][other][other][other][phosphorylation][other][other][other][other]	[ATP binding site [chemical binding]][purine-binding loop][P-loop][switch I region][][switch II region][relay loop][SH1 helix][converter subdomain]
250	3	gi|21536466|ref|NP_068713.2|;gi|21536468|ref|NP_001690.2|;gi|520260399|ref|NP_001265528.1|	gi|21536466|ref|NP_068713.2|	tyrosine-protein kinase receptor UFO isoform 1 precursor [Homo sapiens]	AXL	2	5	5	2	0	5	3.24	0.00017579	0.951351	3	13	13	3	0	13	4.81	0.00018502	6.7027	8	27	27	8	0	27	12.64	0.00123999	894	98337	5.4	o450-472i	33	0.714	S	33	19	2.7.10.1	[26..92][41..123][53..126][141..222][145..223][225..328][335..422][535..811][538..803]	[interaction with Gas6][IG][Ig][Ig2_Tyro3_like][IG_like][FN3][FN3][PTKc_Axl][STYKc]	[][Immunoglobulin; smart00409][Immunoglobulin domain; cd00096][Second immunoglobulin (Ig)-like domain of Axl/Tyro3 receptor tyrosine kinases (RTKs); cd05749][Immunoglobulin like; smart00410][Fibronectin type 3 domain; One of three types of internal repeats found in the plasma protein fibronectin. Its tenth fibronectin type III repeat contains an RGD cell recognition sequence in a flexible loop be…	[208..213][order(211..213,215)][order(225,301,316)][order(317..318,320..321)][order(414..415,417..418)][443..463][order(542..546,550,565,567,598,621..623,627,672,676..677,][order(542..543,550,565,598,621..623,627,672,676..677,679,][order(672,676,708..712,721,755)][689..714][770][779][812][821][857][866][875]	[other][other][other][other][other][transmembrane region][active][other][other][other][phosphorylation][phosphorylation][phosphorylation][phosphorylation][phosphorylation][phosphorylation][phosphorylation]	[dimerization loop][ligand binding site [chemical binding]][Interdomain contacts][Cytokine receptor motif][Cytokine receptor motif][][][ATP binding site [chemical binding]][polypeptide substrate binding site [polypeptide binding]][activation loop (A-loop)][][][][][][][]
251	1	gi|10863877|ref|NP_066928.1|	gi|10863877|ref|NP_066928.1|	phospholipid scramblase 1 [Homo sapiens]	PLSCR1	1	5	5	1	0	5	6.29	0.0004942	0.95	1	13	13	1	0	13	6.29	0.00052014	1.49038	1	6	6	1	0	6	6.29	0.00077467	318	35049	4.9	o	38	0.022	Q	0	3		[18..26][<21..>61][22..25][33..36][<42..>97][42..50][84..92][86..307][257..266]	[SH3-binding 1 (Potential)][DUF3300][WW-binding 1 (Potential)][WW-binding 2 (Potential)][SWI-SNF_Ssr4][SH3-binding 2 (Potential)][SH3-binding 3 (Potential)][Scramblase][Nuclear localization signal]	[propagated from UniProtKB/Swiss-Prot (O15162.1)][Protein of unknown function (DUF3300); pfam11737][propagated from UniProtKB/Swiss-Prot (O15162.1)][propagated from UniProtKB/Swiss-Prot (O15162.1)][Fungal domain of unknown function (DUF1750); pfam08549][propagated from UniProtKB/Swiss-Prot (O15162.1)][propagated from UniProtKB/Swiss-Prot (O15162.1)][Scramblase; pfam03803][propagated from UniProtK…	[69][69][74][74][161][161][289..305]	[phosphorylation][phosphorylation][phosphorylation][phosphorylation][phosphorylation][phosphorylation][transmembrane region]	[][Phosphotyrosine, by ABL; propagated from UniProtKB/Swiss-Prot (O15162.1)][][Phosphotyrosine, by ABL; propagated from UniProtKB/Swiss-Prot (O15162.1)][][Phosphothreonine, by PKC; propagated from UniProtKB/Swiss-Prot (O15162.1)][propagated from UniProtKB/Swiss-Prot (O15162.1)]
252	1	gi|193083122|ref|NP_001122389.1|	gi|193083122|ref|NP_001122389.1|	mitochondrial import receptor subunit TOM40 homolog [Homo sapiens]	TOMM40	3	5	5	3	0	5	9.7	0.00043533	0.949782	3	13	13	3	0	13	11.08	0.00045819	12.417	4	50	50	4	0	50	14.13	0.00568662	361	37893	7.3	o	22	0.101	Q	46	19		[77..361]	[Porin3_Tom40]	[Translocase of outer mitochondrial membrane 40 (Tom40); cd07305]
253	1	gi|77404397|ref|NP_055205.2|	gi|77404397|ref|NP_055205.2|	staphylococcal nuclease domain-containing protein 1 [Homo sapiens]	SND1	4	8	8	4	0	8	7.36	0.00027632	0.938776	4	21	21	4	0	21	8.46	0.00029362	0.153061	1	1	1	1	0	1	2.31	4.512e-05	910	101997	7.2	o	38	0.199	Q	38	7		[21..166][26..166][193..328][201..328][321..325][341..495][350..496][388..392][525..660][533..660][680..799][733..777][<844..895]	[SNc][SNc][SNc][SNc][Nuclear localization signal. {ECO:0000255}][SNc][SNc][Nuclear localization signal. {ECO:0000255}][SNc][SNc][TUDOR][TUDOR][SNc]	[Staphylococcal nuclease homologues; smart00318][Staphylococcal nuclease homologues. SNase homologues are found in bacteria, archaea, and eukaryotes. They contain no disufide bonds; cd00175][Staphylococcal nuclease homologues; smart00318][Staphylococcal nuclease homologues. SNase homologues are found in bacteria, archaea, and eukaryotes. They contain no disufide bonds; cd00175][propagated from Un…	[2][order(31,49,55,58,104..105,107)][109][193][order(206,221,227,269..270,272)][238][240][order(354,368,374,377,435..436,438)][426][429][order(538,553,559,562,603..604,606)][641][order(740,744,746,765,768)][779][781][781][908][909]	[acetylation][other][phosphorylation][acetylation][other][phosphorylation][phosphorylation][other][phosphorylation][phosphorylation][other][acetylation][other][phosphorylation][phosphorylation][phosphorylation][phosphorylation][phosphorylation]	[N-acetylalanine. {ECO:0000244|PubMed:19413330, ECO:0000244|PubMed:22223895, ECO:0000244|PubMed:22814378, ECO:0000244|PubMed:25944712, ECO:0000269|Ref.4}; propagated from UniProtKB/Swiss-Prot (Q7KZF4.1)][Catalytic site][][N6-acetyllysine. {ECO:0000244|PubMed:19608861}; propagated from UniProtKB/Swiss-Prot (Q7KZF4.1)][Catalytic site][][][Catalytic site][Phosphoserine. {ECO:0000244|PubMed:24275569}…
254	1	gi|4557665|ref|NP_000866.1|	gi|4557665|ref|NP_000866.1|	insulin-like growth factor 1 receptor precursor [Homo sapiens]	IGF1R	2	3	3	2	0	3	2.27	6.898e-05	0.932432	4	8	8	4	0	8	4.24	7.446e-05	1.21622	3	3	3	3	0	3	3.07	9.01e-05	1367	154792	5.8	o936-958i	31	0.765	S	31	15	2.7.10.1	[51..161][175..333][230..277][352..467][494..606][611..>655][835..924][977..980][992..1268][999..1266]	[Recep_L_domain][Furin-like][FU][Recep_L_domain][FN3][FN3][FN3][IRS1-and SHC1-binding][PTKc_InsR_like][Pkinase_Tyr]	[Receptor L domain; pfam01030][Furin-like cysteine rich region; pfam00757][Furin-like repeats. Cysteine rich region. Exact function of the domain is not known. Furin is a serine-kinase dependent proprotein processor. Other members of this family include endoproteases and cell surface receptors; cd00064][Receptor L domain; pfam01030][Fibronectin type 3 domain; One of three types of internal repeat…	[order(573,594)][order(595..596,598..599)][order(898,912)][order(913..914,916..917)][936..959][973][980][980][order(1005,1007..1009,1013,1031,1033,1080,1082,1086,1135,][order(1005,1007..1009,1013,1031,1033,1080,1082,1086,1140,][order(1135,1139,1170..1172,1174..1175,1184,1186,1218)][1152..1177][1161][1161][1165][1165][1166][1166][1278][1280][1281][1282][1346]	[other][other][other][other][transmembrane region][phosphorylation][phosphorylation][phosphorylation][active][other][other][other][phosphorylation][phosphorylation][phosphorylation][phosphorylation][phosphorylation][phosphorylation][phosphorylation][phosphorylation][phosphorylation][phosphorylation][phosphorylation]	[Interdomain contacts][Cytokine receptor motif][Interdomain contacts][Cytokine receptor motif][propagated from UniProtKB/Swiss-Prot (P08069.1)][][][Phosphotyrosine. {ECO:0000305|PubMed:7541045}; propagated from UniProtKB/Swiss-Prot (P08069.1)][][ATP binding site [chemical binding]][polypeptide substrate binding site [polypeptide binding]][activation loop (A-loop)][][Phosphotyrosine, by autocataly…
255	1	gi|24041035|ref|NP_077719.2|	gi|24041035|ref|NP_077719.2|	neurogenic locus notch homolog protein 2 isoform 1 preproprotein [Homo sapiens]	NOTCH2	2	3	3	2	0	3	1.05	3.816e-05	0.926829	3	8	8	3	0	8	1.74	4.119e-05	1.60976	2	4	4	2	0	4	1.17	6.646e-05	2471	265403	5.1	o1649-1671i1678-1700o	26	0.947	S	26	1		[182..218][260..296][298..335][415..454][456..492][495..530][532..568][570..604][608..643][645..679][682..717][757..793][795..831][873..909][911..947][949..985][987..1022][1026..1061][1117..1147][1151..1185][1188..1223][1225..1262][1264..1302][<1312..1343][1420..1456][1459..1496][1499..1534][1539..1595][1617..1673][1832..1940][1872..1997][1938..2062][1948..2040][2130..>2422][<2292..2421][2380..24…	[EGF_CA][EGF_CA][EGF_CA][EGF_CA][EGF_CA][EGF_CA][EGF_CA][EGF_CA][EGF_CA][EGF_CA][EGF_CA][EGF_CA][EGF_CA][EGF_CA][EGF_CA][EGF_CA][EGF_CA][EGF_CA][EGF_CA][EGF_CA][EGF_CA][EGF_CA][EGF_CA][EGF_CA][Notch][Notch][Notch][NOD][NODP][Ank_2][ANK][ANK][Ank_2][DUF1421][Chorion_3][DUF3454]	[Calcium-binding EGF-like domain, present in a large number of membrane-bound and extracellular (mostly animal) proteins. Many of these proteins require calcium for their biological function and calcium-binding sites have been found to be located at the...; cd00054][Calcium-binding EGF-like domain, present in a large number of membrane-bound and extracellular (mostly animal) proteins. Many of the…	[order(182,185,200)][order(260,263,277)][order(298,301,317)][order(415,418,435)][order(456,459,473)][order(497,511)][order(532,535,549)][order(570,573,586)][order(610,624)][order(645,648,661)][order(682,685,699)][order(757,760,774)][order(795,798,812)][order(873,876,890)][order(911,914,928)][order(949,952,966)][order(987,990,1004)][order(1028,1042)][order(1152,1166)][order(1190,1204)][order(1225,…	[other][other][other][other][other][other][other][other][other][other][other][other][other][other][other][other][other][other][other][other][other][other][modified][modified][phosphorylation][phosphorylation][phosphorylation][phosphorylation][phosphorylation][phosphorylation][phosphorylation][phosphorylation][phosphorylation][phosphorylation][phosphorylation][phosphorylation]	[Ca2+ binding site [ion binding]][Ca2+ binding site [ion binding]][Ca2+ binding site [ion binding]][Ca2+ binding site [ion binding]][Ca2+ binding site [ion binding]][Ca2+ binding site [ion binding]][Ca2+ binding site [ion binding]][Ca2+ binding site [ion binding]][Ca2+ binding site [ion binding]][Ca2+ binding site [ion binding]][Ca2+ binding site [ion binding]][Ca2+ binding site [ion binding]][Ca…
256	1	gi|68160922|ref|NP_001020242.1|	gi|68160922|ref|NP_001020242.1|	40S ribosomal protein S14 [Homo sapiens]	RPS14	3	6	6	3	0	6	22.52	0.00124891	0.926558	5	16	16	5	0	16	36.42	0.00134818	0.403561	1	2	2	1	0	2	7.28	0.00054381	151	16273	10.1	i	30	0.025	Q	25	5		[1..140]	[PTZ00129]	[40S ribosomal protein S14; Provisional]	[16][133]	[phosphorylation][phosphorylation]	[Phosphoserine. {ECO:0000269|PubMed:24275569}; propagated from UniProtKB/Swiss-Prot (P62263.3)][Phosphothreonine. {ECO:0000269|PubMed:18691976}; propagated from UniProtKB/Swiss-Prot (P62263.3)]
257	1	gi|354721179|ref|NP_001238966.1|	gi|354721179|ref|NP_001238966.1|	ras-related protein Rab-5B isoform 2 [Homo sapiens]	RAB5B	3	8	2	1	6	3	20.69	0.00054191	0.926496	4	19	6	1	13	8	26.44	0.00058499	4.26325	2	14	10	1	4	10.5714	14.37	0.00249446	174	19090	7.3						12		[20..141][22..142]	[Rab5_related][Ras]	[Rab-related GTPase family includes Rab5 and Rab22; regulates early endosome fusion; cd01860][Ras family; pfam00071]	[20..22][27..34][order(29..35,45..46,51..52,78,122..124)][order(35..46,50..51)][order(45,50..58)][order(50,54..61,68,70)][52][order(53..54,56,74..75,82,84,86..88)][53..57][order(55..57,59,81,88..89)][70..74][75..78][order(78,80..90)][81..86][89..90][98..103][122..124][138..140]	[other][other][other][other][other][other][other][other][other][other][other][other][other][other][other][other][other][other]	[Rab subfamily motif 1 (RabSF1)][G1 box][GTP/Mg2+ binding site [chemical binding]][Rab subfamily motif 2 (RabSF2)][Switch I region][putative GEF interaction site [polypeptide binding]][G2 box][putative GDI interaction site [polypeptide binding]][Rab family motif 1 (RabF1)][effector interaction site][Rab family motif 2 (RabF2)][G3 box][Switch II region][Rab family motif 3 (RabF3)][Rab family motif…
258	1	gi|19923142|ref|NP_002256.2|	gi|19923142|ref|NP_002256.2|	importin subunit beta-1 isoform 1 [Homo sapiens]	KPNB1	5	9	9	5	0	9	8.68	0.00032292	0.925501	7	24	24	7	0	24	11.76	0.00034859	0.13467	1	1	1	1	0	1	1.71	4.687e-05	876	97170	4.8	o	46	0.048	Q	46	17		[2..871][2..31][21..101][33..65][85..123][129..160][170..202][212..247][253..302][314..360][329..342][334..419][365..479][402..438][449..485][500..537][544..592][600..639][644..681][686..724][732..776][786..829][831..873]	[KAP95][HEAT 1. {ECO:0000269|PubMed:10353244, ECO:0000269|PubMed:10367892}][IBN_N][HEAT 2. {ECO:0000269|PubMed:10353244, ECO:0000269|PubMed:10367892}][HEAT 3. {ECO:0000269|PubMed:10353244, ECO:0000269|PubMed:10367892}][HEAT 4. {ECO:0000269|PubMed:10353244, ECO:0000269|PubMed:10367892}][HEAT 5. {ECO:0000269|PubMed:10353244, ECO:0000269|PubMed:10367892}][HEAT 6. {ECO:0000269|PubMed:10353244, ECO:00…	[Karyopherin (importin) beta [Intracellular trafficking and secretion]; COG5215][propagated from UniProtKB/Swiss-Prot (Q14974.2)][Importin-beta N-terminal domain; pfam03810][propagated from UniProtKB/Swiss-Prot (Q14974.2)][propagated from UniProtKB/Swiss-Prot (Q14974.2)][propagated from UniProtKB/Swiss-Prot (Q14974.2)][propagated from UniProtKB/Swiss-Prot (Q14974.2)][propagated from UniProtKB/Swi…	[1][12][211][order(384,388,392,423,427,430,434,469,472,475..476,479)][835][867]	[acetylation][phosphorylation][acetylation][other][acetylation][acetylation]	[N-acetylmethionine. {ECO:0000244|PubMed:19413330, ECO:0000244|PubMed:22223895, ECO:0000244|PubMed:22814378, ECO:0000244|PubMed:25944712, ECO:0000269|Ref.9}; propagated from UniProtKB/Swiss-Prot (Q14974.2)][Phosphoserine. {ECO:0000244|PubMed:18669648}; propagated from UniProtKB/Swiss-Prot (Q14974.2)][N6-acetyllysine, alternate. {ECO:0000244|PubMed:19608861}; propagated from UniProtKB/Swiss-Prot (…
259	1	gi|55749577|ref|NP_001142.2|	gi|55749577|ref|NP_001142.2|	ADP/ATP translocase 1 [Homo sapiens]	SLC25A4	6	81	1	1	80	69.1212	23.15	0.00729042	0.918367	6	214	9	1	205	185.916	24.83	0.00793789	0.0919627	4	9	2	1	7	5.2963	13.42	0.00072971	298	33064	9.8	o112-134i172-194o209-231i	20	0.408	Q	25	4		[6..98][7..298][7..101][110..206][111..201][212..297][222..297][235..240]	[Solcar 1][PTZ00169][Mito_carr][Mito_carr][Solcar 2][Solcar 3][Mito_carr][Substrate recognition. {ECO:0000250}]	[propagated from UniProtKB/Swiss-Prot (P12235.4)][ADP/ATP transporter on adenylate translocase; Provisional][Mitochondrial carrier protein; pfam00153][Mitochondrial carrier protein; pfam00153][propagated from UniProtKB/Swiss-Prot (P12235.4)][propagated from UniProtKB/Swiss-Prot (P12235.4)][Mitochondrial carrier protein; pfam00153][propagated from UniProtKB/Swiss-Prot (P12235.4)]	[2][5..39][75..100][109..143][147][160][176..202][207..241][245][272][273..298]	[acetylation][transmembrane region][transmembrane region][transmembrane region][modified][nitrosylation][transmembrane region][transmembrane region][modified][modified][transmembrane region]	[N-acetylglycine. {ECO:0000269|Ref.8}; propagated from UniProtKB/Swiss-Prot (P12235.4)][propagated from UniProtKB/Swiss-Prot (P12235.4)][propagated from UniProtKB/Swiss-Prot (P12235.4)][propagated from UniProtKB/Swiss-Prot (P12235.4)][N6-succinyllysine. {ECO:0000250|UniProtKB:P48962}; propagated from UniProtKB/Swiss-Prot (P12235.4)][S-nitrosocysteine. {ECO:0000250|UniProtKB:Q05962}; propagated fr…
260	1	gi|39725636|ref|NP_059980.2|	gi|39725636|ref|NP_059980.2|	transmembrane emp24 domain-containing protein 9 precursor [Homo sapiens]	TMED9	2	4	1	1	3	4	7.66	0.000535	0.91453	3	16	3	2	13	10.8	12.34	0.00058474	5.65641	5	20	14	4	6	18.9412	20.43	0.00330926	235	27277	8	o20-42i203-222o	38	0.749	S	38	5		[37..230][121..160][228..235][228..229]	[EMP24_GP25L][Required for interaction with STX17][COPI vesicle coat-binding. {ECO:0000255}][COPII vesicle coat-binding. {ECO:0000255}]	[emp24/gp25L/p24 family/GOLD; pfam01105][propagated from UniProtKB/Swiss-Prot (Q9BVK6.2)][propagated from UniProtKB/Swiss-Prot (Q9BVK6.2)][propagated from UniProtKB/Swiss-Prot (Q9BVK6.2)]	[125][160][203..222]	[glycosylation][acetylation][transmembrane region]	[][N6-acetyllysine. {ECO:0000250|UniProtKB:Q99KF1}; propagated from UniProtKB/Swiss-Prot (Q9BVK6.2)][propagated from UniProtKB/Swiss-Prot (Q9BVK6.2)]
261	2	gi|154759259|ref|NP_003118.2|;gi|306966132|ref|NP_001182461.1|	gi|154759259|ref|NP_003118.2|	spectrin alpha chain, non-erythrocytic 1 isoform 2 [Homo sapiens]	SPTAN1	44	98	98	44	0	98	25.89	0.00124605	0.910153	63	266	266	63	0	266	34.71	0.00136911	0.0124178	1	1	1	1	0	1	0.53	1.661e-05	2472	284538	5.3	o	39	0.013	Q	0	9		[10..42][<12..148][44..147][149..253][150..361][255..359][361..465][362..572][467..571][468..678][573..676][678..782][679..890][784..888][890..>971][890..955][971..1023][1062..1089][1091..1161][1092..1339][1208..1231][1233..1337][1234..1445][1339..1443][1445..1549][1446..1658][1551..1656][1658..1762][1658..1762][1764..1868][1765..1974][1870..1974][1871..2082][1976..2081][1978..2196][2091..2195][2…	[Spectrin 1][SPEC][Spectrin 2][Spectrin 3][SPEC][Spectrin 4][Spectrin 5][SPEC][Spectrin 6][SPEC][Spectrin 7][Spectrin 8][SPEC][Spectrin 9][Spectrin][Spectrin 10][SH3_Alpha_Spectrin][Spectrin 11][Spectrin 12][SPEC][Spectrin 13][Spectrin 14][SPEC][Spectrin 15][Spectrin 16][SPEC][Spectrin 17][Spectrin 18][Spectrin][Spectrin 19][SPEC][Spectrin 20][SPEC][Spectrin 21][SPEC][Spectrin 22][SPEC][Spectrin …	[propagated from UniProtKB/Swiss-Prot (Q13813.3)][Spectrin repeats, found in several proteins involved in cytoskeletal structure; family members include spectrin, alpha-actinin and dystrophin; the spectrin repeat forms a three helix bundle with the second helix interrupted by proline in some sequences; cd00176][propagated from UniProtKB/Swiss-Prot (Q13813.3)][propagated from UniProtKB/Swiss-Prot …	[1][43..48][254..259][466..471][572..577][587][637][783..788][803][924][order(976,978,981,1003..1004,1017,1019..1020)][982][999][1029][1031][1041][1176..1177][1176][1190][1207][1217][1232..1237][1291][1306][1323][1338..1343][1338][1519][1550..1555][1550][1557][1578][1615][1647][1869..1874][1975..1980][2020][2052][2082..2087][2196..2201][order(2336,2338,2340,2347,2379,2381,2383,2390)][2421]	[acetylation][other][other][other][other][phosphorylation][acetylation][other][acetylation][phosphorylation][other][phosphorylation][phosphorylation][phosphorylation][phosphorylation][phosphorylation][cleavage][phosphorylation][phosphorylation][phosphorylation][phosphorylation][other][phosphorylation][phosphorylation][phosphorylation][other][phosphorylation][acetylation][other][phosphorylation][p…	[N-acetylmethionine. {ECO:0000244|PubMed:22814378}; propagated from UniProtKB/Swiss-Prot (Q13813.3)][linker region][linker region][linker region][linker region][Phosphoserine. {ECO:0000250|UniProtKB:P16546}; propagated from UniProtKB/Swiss-Prot (Q13813.3)][N6-acetyllysine. {ECO:0000244|PubMed:19608861}; propagated from UniProtKB/Swiss-Prot (Q13813.3)][linker region][N6-acetyllysine. {ECO:0000250|…
262	1	gi|4506605|ref|NP_000969.1|	gi|4506605|ref|NP_000969.1|	60S ribosomal protein L23 [Homo sapiens]	RPL23	5	14	14	5	0	14	35	0.0031431	0.909959	5	38	38	5	0	38	35	0.00345351	0.339606	1	4	4	1	0	4	14.29	0.00117307	140	14865	10.5	o	35	0.249	S	29	17		[2..139]	[PTZ00054]	[60S ribosomal protein L23; Provisional]	[17][38][38]	[phosphorylation][phosphorylation][phosphorylation]	[Phosphoserine; propagated from UniProtKB/Swiss-Prot (P62829.1)][][Phosphotyrosine; propagated from UniProtKB/Swiss-Prot (P62829.1)]
263	1	gi|291621647|ref|NP_006311.2|	gi|291621647|ref|NP_006311.2|	membrane-associated progesterone receptor component 2 [Homo sapiens]	PGRMC2	3	6	4	2	2	5.14286	18.22	0.00065443	0.900826	5	16	12	4	4	14.087	28.34	0.00072565	7.32645	5	32	28	3	4	32	21.46	0.00531918	247	26170	5.3						4		[127..224]	[Cyt-b5]	[Cytochrome b5-like Heme/Steroid binding domain; pfam00173]
264	1	gi|380837121|ref|NP_004883.3|	gi|380837121|ref|NP_004883.3|	vesicle-trafficking protein SEC22b precursor [Homo sapiens]	SEC22B	4	8	8	4	0	8	25.58	0.00116952	0.898618	5	22	22	5	0	22	30.23	0.00130194	5.57373	8	38	38	8	0	38	34.88	0.00725666	215	24741	8.5	i191-213o	14	0.608	Q	20	1		[10..188][36..118][132..195]	[SNC1][Longin][R-SNARE_SEC22]	[Synaptobrevin/VAMP-like protein [Intracellular trafficking and secretion]; COG5143][Regulated-SNARE-like domain; pfam13774][SNARE motif of SEC22; cd15866]	[38][order(134..136,138..139,141..146,148..150,152,155..156,][137][140][159][168][177][195..215]	[acetylation][other][phosphorylation][phosphorylation][other][phosphorylation][phosphorylation][transmembrane region]	[N6-acetyllysine. {ECO:0000269|PubMed:19608861}; propagated from UniProtKB/Swiss-Prot (O75396.4)][heterotetramer interface [polypeptide binding]][Phosphoserine. {ECO:0000269|PubMed:18669648, ECO:0000269|PubMed:18691976, ECO:0000269|PubMed:20068231, ECO:0000269|PubMed:21406692, ECO:0000269|PubMed:24275569}; propagated from UniProtKB/Swiss-Prot (O75396.4)][Phosphothreonine. {ECO:0000269|PubMed:2140…
265	1	gi|378548190|ref|NP_001243731.1|	gi|378548190|ref|NP_001243731.1|	40S ribosomal protein S3 isoform 1 [Homo sapiens]	RPS3	5	8	8	5	0	8	27.98	0.00103476	0.898437	8	22	22	8	0	22	37.04	0.00115192	0.146701	1	1	1	1	0	1	4.94	0.00016896	243	26688	9.7	o	31	0.038	Q	0	11	4.2.99.18	[4..216][15..95][104..188]	[PTZ00084][40S_S3_KH][Ribosomal_S3_C]	[40S ribosomal protein S3; Provisional][K homology RNA-binding (KH) domain of the eukaryotic 40S small ribosomal subunit protein S3. S3 is part of the head region of the 40S ribosomal subunit and is believed to interact with mRNA as it threads its way from the latch into the channel. The KH...; cd02413][Ribosomal protein S3, C-terminal domain; pfam00189]	[2][6][42][60..63][62][64][65][67][70][132][209][221][224][242]	[acetylation][phosphorylation][phosphorylation][other][acetylation][methylation][methylation][methylation][phosphorylation][modified][phosphorylation][phosphorylation][phosphorylation][phosphorylation]	[N-acetylalanine. {ECO:0000244|PubMed:19413330, ECO:0000244|PubMed:22814378, ECO:0000244|PubMed:25944712, ECO:0000269|Ref.10}; propagated from UniProtKB/Swiss-Prot (P23396.2)][Phosphoserine, by PKC/PRKCD. {ECO:0000269|PubMed:19059439}; propagated from UniProtKB/Swiss-Prot (P23396.2)][Phosphothreonine, by MAPK. {ECO:0000269|PubMed:15950189}; propagated from UniProtKB/Swiss-Prot (P23396.2)][G-X-X-G…
266	1	gi|15431301|ref|NP_000962.2|	gi|15431301|ref|NP_000962.2|	60S ribosomal protein L7 [Homo sapiens]	RPL7	4	12	12	4	0	12	21.37	0.00152085	0.898405	6	33	33	6	0	33	25.81	0.00169304	1.76019	6	18	18	6	0	18	28.63	0.00297997	248	29226	10.7	o	39	0.019	Q	0	8		[7..54][16..248][17..87][89..248]	[4 X 12 AA tandem repeats][uL30_euk][Ribosomal_L30_N][Ribosomal_L7_archeal_euk]	[propagated from UniProtKB/Swiss-Prot (P18124.1)][60S ribosomal protein uL30, eukaryotic form; TIGR01310][Ribosomal L30 N-terminal domain; pfam08079][Ribosomal protein L7, which is found in archaea and eukaryotes but not in prokaryotes, binds domain II of the 23S rRNA as well as the 5S rRNA and is one of five ribosomal proteins that mediate the interactions 5S rRNA makes with the ribosome. The...…	[1][1][order(95..97,103..105,107..108,110..113,115..119,127..132,][124][order(134..135,137..139,227..230)][139][139]	[acetylation][acetylation][other][acetylation][other][phosphorylation][phosphorylation]	[][N-acetylmethionine; propagated from UniProtKB/Swiss-Prot (P18124.1)][23S rRNA binding site [nucleotide binding]][N6-acetyllysine; propagated from UniProtKB/Swiss-Prot (P18124.1)][5S rRNA binding site [nucleotide binding]][][Phosphotyrosine; propagated from UniProtKB/Swiss-Prot (P18124.1)]
267	1	gi|7657347|ref|NP_055157.1|	gi|7657347|ref|NP_055157.1|	mitochondrial carrier homolog 2 [Homo sapiens]	MTCH2	2	4	4	2	0	4	9.57	0.00041493	0.898268	2	11	11	2	0	11	8.25	0.00046191	0.880952	2	3	3	2	0	3	5.61	0.00040651	303	33331	8	o	19	0.36	Q	19	11		[2..98][118..206][128..>192]	[Solcar 1][Solcar 2][Mito_carr]	[propagated from UniProtKB/Swiss-Prot (Q9Y6C9.1)][propagated from UniProtKB/Swiss-Prot (Q9Y6C9.1)][Mitochondrial carrier protein; pfam00153]	[2][8..28][175..195][224..244]	[acetylation][transmembrane region][transmembrane region][transmembrane region]	[N-acetylalanine. {ECO:0000244|PubMed:19413330, ECO:0000244|PubMed:25944712}; propagated from UniProtKB/Swiss-Prot (Q9Y6C9.1)][propagated from UniProtKB/Swiss-Prot (Q9Y6C9.1)][propagated from UniProtKB/Swiss-Prot (Q9Y6C9.1)][propagated from UniProtKB/Swiss-Prot (Q9Y6C9.1)]
268	1	gi|4758874|ref|NP_004791.1|	gi|4758874|ref|NP_004791.1|	transmembrane 9 superfamily member 2 precursor [Homo sapiens]	TM9SF2	3	8	8	3	0	8	8.3	0.00037926	0.898104	4	22	22	4	0	22	10.56	0.0004222	4.40284	6	30	30	6	0	30	14.48	0.0018578	663	75776	7.4	o301-323i364-386o396-418i434-456o471-493i520-542o557-579i592-611o631-653i	29	0.723	S	36	13		[74..621]	[EMP70]	[Endomembrane protein 70; pfam02990]	[301..321][375..395][399..419][438..458][467..487][523..543][555..575][592..612][632..652]	[transmembrane region][transmembrane region][transmembrane region][transmembrane region][transmembrane region][transmembrane region][transmembrane region][transmembrane region][transmembrane region]	[propagated from UniProtKB/Swiss-Prot (Q99805.1)][propagated from UniProtKB/Swiss-Prot (Q99805.1)][propagated from UniProtKB/Swiss-Prot (Q99805.1)][propagated from UniProtKB/Swiss-Prot (Q99805.1)][propagated from UniProtKB/Swiss-Prot (Q99805.1)][propagated from UniProtKB/Swiss-Prot (Q99805.1)][propagated from UniProtKB/Swiss-Prot (Q99805.1)][propagated from UniProtKB/Swiss-Prot (Q99805.1)][propag…
269	1	gi|358356404|ref|NP_001240312.1|	gi|358356404|ref|NP_001240312.1|	60S ribosomal protein L15 isoform 1 [Homo sapiens]	RPL15	2	4	4	2	0	4	13.24	0.00061629	0.897959	3	11	11	3	0	11	17.65	0.00068607	3.52041	2	12	12	2	0	12	11.27	0.00241514	204	24146	11.6	o	28	0.115	Q	28	3		[2..193]	[Ribosomal_L15e]	[Ribosomal L15; pfam00827]	[97][100]	[phosphorylation][phosphorylation]	[Phosphoserine; propagated from UniProtKB/Swiss-Prot (P61313.2)][Phosphoserine; propagated from UniProtKB/Swiss-Prot (P61313.2)]
270	4	gi|297307116|ref|NP_001171989.1|;gi|297307118|ref|NP_001171990.1|;gi|297307120|ref|NP_001171991.1|;gi|37694062|ref|NP_932766.1|	gi|297307116|ref|NP_001171989.1|	aquaporin-1 isoform 2 [Homo sapiens]	AQP1	1	41	41	1	0	41	10.75	0.00692833	0.888433	1	114	114	1	0	114	10.75	0.00779825	0.622724	1	22	22	1	0	22	10.75	0.00485625	186	19956	7.5						7	2.7.1.21	[<38..144]	[MIP]	[Major intrinsic protein (MIP) superfamily. Members of the MIP superfamily function as membrane channels that selectively transport water, small neutral molecules, and ions out of and between cells. The channel proteins share a common fold: the N-terminal...; cl00200]	[order(105..106,109,112)][109..111]	[other][other]	[amphipathic channel][Asn-Pro-Ala signature motifs]
271	1	gi|166295173|ref|NP_060710.3|	gi|166295173|ref|NP_060710.3|	kin of IRRE-like protein 1 isoform 1 precursor [Homo sapiens]	KIRREL	3	5	5	3	0	5	5.81	0.0002076	0.885106	7	14	14	7	0	14	12.29	0.00023531	1.15319	4	5	5	4	0	5	7.79	0.00027118	757	83536	5.7						1		[22..116][25..116][138..219][223..304][226..305][311..389][321..373][391..488][400..488][405..407]	[I-set][Ig][Ig2_KIRREL3-like][I-set][Ig_2][Ig_2][IGc2][Ig5_KIRREL3][IG_like][Cell attachment site. {ECO:0000255}]	[Immunoglobulin I-set domain; pfam07679][Immunoglobulin domain; cl11960][Second immunoglobulin (Ig)-like domain of Kirrel (kin of irregular chiasm-like) 3 (also known as Neph2); cd05759][Immunoglobulin I-set domain; pfam07679][Immunoglobulin domain; pfam13895][Immunoglobulin domain; pfam13895][Immunoglobulin C-2 Type; smart00408][Fifth immunoglobulin (Ig)-like domain of Kirrel (kin of irregular c…	[500..520][605][606][622][625][724]	[transmembrane region][phosphorylation][phosphorylation][phosphorylation][phosphorylation][phosphorylation]	[propagated from UniProtKB/Swiss-Prot (Q96J84.2)][Phosphotyrosine, by FYN. {ECO:0000250}; propagated from UniProtKB/Swiss-Prot (Q96J84.2)][Phosphotyrosine, by FYN. {ECO:0000250}; propagated from UniProtKB/Swiss-Prot (Q96J84.2)][Phosphotyrosine. {ECO:0000269|PubMed:15144186}; propagated from UniProtKB/Swiss-Prot (Q96J84.2)][Phosphotyrosine. {ECO:0000269|PubMed:15144186}; propagated from UniProtKB/…
272	1	gi|156071459|ref|NP_001143.2|	gi|156071459|ref|NP_001143.2|	ADP/ATP translocase 2 [Homo sapiens]	SLC25A5	7	112	98	3	14	111.879	20.13	0.0118002	0.882771	9	314	276	4	38	313.084	28.19	0.0133675	0.316451	7	31	25	4	6	30.7037	22.82	0.00423025	298	32852	9.7	o109-131i172-194o209-231i	20	0.183	Q	25	X		[6..98][7..296][7..101][110..206][111..201][209..297][212..297][235..240]	[Solcar 1][PTZ00169][Mito_carr][Mito_carr][Solcar 2][Mito_carr][Solcar 3][Substrate recognition. {ECO:0000250}]	[propagated from UniProtKB/Swiss-Prot (P05141.7)][ADP/ATP transporter on adenylate translocase; Provisional][Mitochondrial carrier protein; pfam00153][Mitochondrial carrier protein; pfam00153][propagated from UniProtKB/Swiss-Prot (P05141.7)][Mitochondrial carrier protein; pfam00153][propagated from UniProtKB/Swiss-Prot (P05141.7)][propagated from UniProtKB/Swiss-Prot (P05141.7)]	[1][2][5..39][23][43][52][75..100][92][96][105][105][109..143][147][147][163][166][176..202][207..241][268][268][273..298]	[acetylation][acetylation][transmembrane region][modified][modified][methylation][transmembrane region][modified][modified][acetylation][modified][transmembrane region][acetylation][modified][acetylation][acetylation][transmembrane region][transmembrane region][acetylation][modified][transmembrane region]	[N-acetylmethionine. {ECO:0000244|PubMed:19413330}; propagated from UniProtKB/Swiss-Prot (P05141.7)][N-acetylthreonine, in ADP/ATP translocase 2, N-terminally processed. {ECO:0000244|PubMed:19413330, ECO:0000244|PubMed:22223895, ECO:0000244|PubMed:25944712, ECO:0000269|Ref.7, ECO:0000269|Ref.8}; propagated from UniProtKB/Swiss-Prot (P05141.7)][propagated from UniProtKB/Swiss-Prot (P05141.7)][N6-m…
273	1	gi|4506725|ref|NP_000998.1|	gi|4506725|ref|NP_000998.1|	40S ribosomal protein S4, X isoform X isoform [Homo sapiens]	RPS4X	4	15	15	4	0	15	17.11	0.00179264	0.882382	6	42	42	6	0	42	29.28	0.00203188	0.230315	2	3	3	2	0	3	12.93	0.00046834	263	29598	10.2	o	35	0.09	Q	58	X		[1..260][3..40][51..112][94..170][175..229]	[PLN00036][RS4NT][S4][Ribosomal_S4e][KOW_RPS4]	[40S ribosomal protein S4; Provisional][RS4NT (NUC023) domain; pfam08071][S4/Hsp/ tRNA synthetase RNA-binding domain; The domain surface is populated by conserved, charged residues that define a likely RNA-binding site; Found in stress proteins, ribosomal proteins and tRNA synthetases; This may imply a hitherto unrecognized...; cd00165][Ribosomal family S4e; pfam00900][KOW motif of Ribosomal Prot…	[order(56..57,59..60,62..63,66..67,69,76..83,85)][order(186..188,197,199,201..202,204,206..207,219,221)]	[other][other]	[RNA binding surface [nucleotide binding]][RNA binding site [nucleotide binding]]
274	1	gi|208610002|ref|NP_001129145.1|	gi|208610002|ref|NP_001129145.1|	atlastin-2 isoform 2 [Homo sapiens]	ATL2	4	5	5	4	0	5	11.32	0.00026956	0.882353	5	14	14	5	0	14	14.41	0.00030554	1.83987	3	8	8	3	0	8	8.92	0.00056339	583	66229	5.5						2		[90..334]	[GBP]	[Guanylate-binding protein (GBP) family (N-terminal domain); cd01851]	[24][101..108][order(103..109,139..141,146..147,176,244..245,299)][order(136..141,146..153)][147][173..176][order(175..179,189..195,198..200)][244..247][297..299][422][477..497][500..520]	[phosphorylation][other][other][other][other][other][other][other][other][acetylation][transmembrane region][transmembrane region]	[Phosphoserine. {ECO:0000244|PubMed:18669648, ECO:0000244|PubMed:19690332}; propagated from UniProtKB/Swiss-Prot (Q8NHH9.2)][G1 box][GTP/Mg2+ binding site [chemical binding]][Switch I region][G2 box][G3 box][Switch II region][G4 box][G5 box][N6-acetyllysine. {ECO:0000250|UniProtKB:Q6DD88}; propagated from UniProtKB/Swiss-Prot (Q8NHH9.2)][propagated from UniProtKB/Swiss-Prot (Q8NHH9.2)][propagated…
275	1	gi|237649019|ref|NP_001153682.1|	gi|237649019|ref|NP_001153682.1|	calcium-binding mitochondrial carrier protein Aralar2 isoform 1 [Homo sapiens]	SLC25A13	4	10	5	2	5	6.04167	6.95	0.00028091	0.869969	9	23	15	7	8	17.1818	21.75	0.00032339	0.374613	1	2	2	1	0	2	1.92	0.00012147	676	74304	8.6	o	18	0.098	Q	15	7		[19..81][29..81][327..419][328..591][332..424][425..512][427..511][517..608][519..607]	[EFh][EF-hand_7][Solcar 1][PTZ00168][Mito_carr][Mito_carr][Solcar 2][Mito_carr][Solcar 3]	[EF-hand, calcium binding motif; A diverse superfamily of calcium sensors and calcium signal modulators; most examples in this alignment model have 2 active canonical EF hands. Ca2+ binding induces a conformational change in the EF-hand motif, leading to...; cl08302][EF-hand domain pair; pfam13499][propagated from UniProtKB/Swiss-Prot (Q9UJS0.2)][mitochondrial carrier protein; Provisional][Mitoch…	[2][order(25,30,33,39..40,66,68,70,72,74,77)][333..350][354][373][394..413][437..450][485][485][486..505][525..542][581][582..601][663]	[acetylation][other][transmembrane region][acetylation][acetylation][transmembrane region][transmembrane region][acetylation][modified][transmembrane region][transmembrane region][modified][transmembrane region][acetylation]	[N-acetylalanine. {ECO:0000244|PubMed:22814378, ECO:0000244|PubMed:25944712}; propagated from UniProtKB/Swiss-Prot (Q9UJS0.2)][Ca2+ binding site [ion binding]][propagated from UniProtKB/Swiss-Prot (Q9UJS0.2)][N6-acetyllysine. {ECO:0000250|UniProtKB:Q9QXX4}; propagated from UniProtKB/Swiss-Prot (Q9UJS0.2)][N6-acetyllysine. {ECO:0000250|UniProtKB:Q9QXX4}; propagated from UniProtKB/Swiss-Prot (Q9UJS…
276	1	gi|32189394|ref|NP_001677.2|	gi|32189394|ref|NP_001677.2|	ATP synthase subunit beta, mitochondrial precursor [Homo sapiens]	ATP5B	26	340	340	26	0	340	68.81	0.0202014	0.864991	24	971	971	24	0	971	63.71	0.0233544	0.0398647	4	12	12	4	0	12	11.53	0.00093136	529	56560	5.4	o	16	0.322	S	43	12	3.6.3.14	[58..524][63..129][131..410][418..525]	[PRK09280][ATP-synt_ab_N][F1-ATPase_beta][ATP-synt_ab_C]	[F0F1 ATP synthase subunit beta; Validated][ATP synthase alpha/beta family, beta-barrel domain; pfam02874][F1 ATP synthase beta subunit, nucleotide-binding domain. The F-ATPase is found in bacterial plasma membranes, mitochondrial inner membranes and in chloroplast thylakoid membranes. It has also been found in the archaea Methanosarcina barkeri. It uses a...; cd01133][ATP synthase alpha/beta cha…	[133][order(154,171,173..174,176,178,239..241,244,272..274,279,][198][207..213][order(209,212..214,238..239,242,306,310,394..395)][302..306][order(392,394,400..401)][426]	[acetylation][other][acetylation][other][other][other][inhibition][acetylation]	[N6-acetyllysine, alternate; propagated from UniProtKB/Swiss-Prot (P06576.3)][alpha subunit interaction interface [polypeptide binding]][N6-acetyllysine; propagated from UniProtKB/Swiss-Prot (P06576.3)][Walker A motif][ATP binding site [chemical binding]][Walker B motif][inhibitor binding site][N6-acetyllysine; propagated from UniProtKB/Swiss-Prot (P06576.3)]
277	1	gi|32483374|ref|NP_006383.2|	gi|32483374|ref|NP_006383.2|	nucleolar protein 56 [Homo sapiens]	NOP56	5	7	7	5	0	7	12.29	0.0003704	0.864486	3	20	20	3	0	20	8.25	0.0004284	0.969626	3	6	6	3	0	6	8.59	0.00041472	594	66050	9.2	o	18	0.445	Q	19	20		[4..70][48..412][168..219][263..411]	[NOP5NT][SIK1][NOSIC][Nop]	[NOP5NT (NUC127) domain; pfam08156][RNA processing factor Prp31, contains Nop domain [Translation, ribosomal structure and biogenesis]; COG1498][NOSIC (NUC001) domain; pfam08060][Putative snoRNA binding domain; pfam01798]	[314][406][511][519][519][520][520][520][569][570][579][581]	[phosphorylation][phosphorylation][phosphorylation][phosphorylation][phosphorylation][phosphorylation][phosphorylation][phosphorylation][phosphorylation][phosphorylation][phosphorylation][phosphorylation]	[Phosphoserine; propagated from UniProtKB/Swiss-Prot (O00567.4)][][Phosphoserine; propagated from UniProtKB/Swiss-Prot (O00567.4)][][Phosphoserine; propagated from UniProtKB/Swiss-Prot (O00567.4)][][][Phosphoserine; propagated from UniProtKB/Swiss-Prot (O00567.4)][Phosphoserine; propagated from UniProtKB/Swiss-Prot (O00567.4)][Phosphoserine; propagated from UniProtKB/Swiss-Prot (O00567.4)][Phosph…
278	1	gi|296317337|ref|NP_001171712.1|	gi|296317337|ref|NP_001171712.1|	voltage-dependent anion-selective channel protein 2 isoform 1 [Homo sapiens]	VDAC2	8	36	36	8	0	36	42.39	0.00366186	0.863476	9	103	103	9	0	103	42.39	0.00424115	1.40981	7	45	45	7	0	45	28.48	0.00597923	309	33372	7.6						10		[30..308]	[Porin3_VDAC]	[Voltage-dependent anion channel of the outer mitochondrial membrane; cd07306]	[order(42,46,72,87,110,180,308)][order(53,55,283,285,303)]	[other][other]	[putative determinants of voltage gating][putative dimerization interface [polypeptide binding]]
279	1	gi|208431833|ref|NP_001129125.1|	gi|208431833|ref|NP_001129125.1|	polyadenylate-binding protein 4 isoform 1 [Homo sapiens]	PABPC4	4	11	7	3	4	9.54545	8.94	0.00045458	0.861742	6	28	26	5	2	27.3684	12.12	0.00052761	0.117424	1	1	1	1	0	1	2.58	6.221e-05	660	72391	9.3	o	40	0.071	Q	21	1		[11..640][12..91][97..172][190..269][293..370][569..639]	[PABP-1234][RRM1_I_PABPs][RRM2_I_PABPs][RRM3_I_PABPs][RRM4_I_PABPs][PABP]	[polyadenylate binding protein, human types 1, 2, 3, 4 family; TIGR01628][RNA recognition motif 1 in type I polyadenylate-binding proteins; cd12378][RNA recognition motif 2 found in type I polyadenylate-binding proteins; cd12379][RNA recognition motif 3 found in type I polyadenylate-binding proteins; cd12380][RNA recognition motif 4 in type I polyadenylate-binding proteins; cd12381][Poly-adenylat…	[order(12,14,24,41..42,44..46,49,52,54,56,58,83,85..89)][order(23..25,28,40,44,46..50,89,91)][order(100,102,104..105,127,138..140,142,144,169,172)]	[other][other][other]	[RNA binding site [nucleotide binding]][oligomer interface [polypeptide binding]][RNA binding site [nucleotide binding]]
280	1	gi|4506687|ref|NP_001009.1|	gi|4506687|ref|NP_001009.1|	40S ribosomal protein S15 [Homo sapiens]	RPS15	2	15	15	2	0	15	28.28	0.00325148	0.861649	2	43	43	2	0	43	28.28	0.00377316	0.300292	1	4	4	1	0	4	13.1	0.00113262	145	17040	10.4	i	36	0.028	Q	0	19		[1..143]	[PTZ00096]	[40S ribosomal protein S15; Provisional]	[2]	[acetylation]	[N-acetylalanine. {ECO:0000269|PubMed:19413330, ECO:0000269|PubMed:22814378}; propagated from UniProtKB/Swiss-Prot (P62841.2)]
281	1	gi|32967311|ref|NP_004422.2|	gi|32967311|ref|NP_004422.2|	ephrin type-A receptor 2 precursor [Homo sapiens]	EPHA2	9	13	10	7	3	11.0468	12.4	0.00035575	0.853717	11	32	32	11	0	32	15.98	0.00041716	2.54197	8	26	24	7	2	25.2	10.55	0.00106009	976	108266	6.2	o536-558i	24	0.757	S	27	1	2.7.10.1	[1..206][28..201][261..326][276..307][329..429][439..526][<556..610][606..906][607..875][613..871][886..976][902..971][902..968][974..976]	[Mediates interaction with CLDN4][EphR_LBD_A2][TNFRSF][CRD2][FN3][FN3][EphA2_TM][Mediates interaction with ARHGEF16 and ELMO2][PTKc_EphR_A2][Pkinase_Tyr][Negatively regulates interaction with ARHGEF16][SAM_EPH-A2][SAM][PDZ-binding (Potential)]	[propagated from UniProtKB/Swiss-Prot (P29317.2)][Ligand Binding Domain of Ephrin type-A Receptor 2; cd10480][Tumor necrosis factor receptor superfamily (TNFRSF); cl22855][CRD2 [structural motif]][Fibronectin type 3 domain; One of three types of internal repeats found in the plasma protein fibronectin. Its tenth fibronectin type III repeat contains an RGD cell recognition sequence in a flexible l…	[order(53,55..59,61,63,65..66,68..70,73,101,103,108,151,][129..133][153][order(329,404,417)][373][order(418..419,421..422)][order(499,514)][order(515..516,518..519)][538..558][570][570][575][575][579][587][588][593][594][594][order(619,621..623,627,644,646,692..693,695,739,743..744,][order(619,622..623,644,646,692..693,695,744,746,757)][628][647][order(739,743,776..780,789,823)][756..782][771][77…	[other][other][phosphorylation][other][phosphorylation][other][other][other][transmembrane region][phosphorylation][phosphorylation][phosphorylation][phosphorylation][phosphorylation][phosphorylation][phosphorylation][phosphorylation][phosphorylation][phosphorylation][active][other][phosphorylation][phosphorylation][other][other][phosphorylation][phosphorylation][phosphorylation][phosphorylation]…	[ephrin binding site [polypeptide binding]][dimer interface [polypeptide binding]][Phosphoserine; propagated from UniProtKB/Swiss-Prot (P29317.2)][Interdomain contacts][Phosphoserine; propagated from UniProtKB/Swiss-Prot (P29317.2)][Cytokine receptor motif][Interdomain contacts][Cytokine receptor motif][propagated from UniProtKB/Swiss-Prot (P29317.2)][][Phosphoserine; propagated from UniProtKB/Sw…
282	1	gi|13569962|ref|NP_112243.1|	gi|13569962|ref|NP_112243.1|	ras-related protein Rab-1B [Homo sapiens]	RAB1B	6	43	6	3	37	19.0588	51.74	0.00298028	0.853379	5	77	31	2	46	55.1695	41.29	0.00349227	11.5968	5	344	41	1	303	198.253	37.81	0.0404963	201	22171	5.7	o	35	0.159	Q	21	11		[7..172][10..171][37..45][64..83]	[Rab1_Ypt1][Ras][Effector region (By similarity)][Switch 2 region, required for interaction with REP1/CHM]	[Rab GTPase family 1 includes the yeast homolog Ypt1; cd01869][Ras family; pfam00071][propagated from UniProtKB/Swiss-Prot (Q9H0U4.1)][propagated from UniProtKB/Swiss-Prot (Q9H0U4.1)]	[1][7..10][15..22][order(16,18..23,33,121..122,124,151..153)][order(23..34,37..39)][order(33,38..46)][order(38,42..49,56,58)][40][order(41,43..45,60,62,69..70,73,77,79..82,169)][order(41..42,44,62..63,70,72,74..76,79)][41..45][58..62][63..66][order(66,68..78)][69..74][76][77..81][77][86..91][112..118][121..124][151..153][167..172]	[acetylation][other][other][other][other][other][other][other][other][other][other][other][other][other][other][phosphorylation][other][modified][other][other][other][other][other]	[N-acetylmethionine; propagated from UniProtKB/Swiss-Prot (Q9H0U4.1)][Rab subfamily motif 1 (RabSF1)][G1 box][GTP/Mg2+ binding site [chemical binding]][Rab subfamily motif 2 (RabSF2)][Switch I region][putative GEF interaction site [polypeptide binding]][G2 box][putative effector interaction site][GDI interaction site][Rab family motif 1 (RabF1)][Rab family motif 2 (RabF2)][G3 box][Switch II regio…
283	1	gi|13236587|ref|NP_077310.1|	gi|13236587|ref|NP_077310.1|	transmembrane protein 43 [Homo sapiens]	TMEM43	1	1	1	1	0	1	3.75	7.858e-05	0.831579	2	3	3	2	0	3	10.75	9.543e-05	14.0421	2	13	13	2	0	13	9.5	0.00133437	400	44876	8.1	o32-51i309-331o346-368i373-390o	58	0.101	A	58	3		[121..373]	[DUF1625]	[Protein of unknown function (DUF1625); pfam07787]	[2][32..52][314..334][346..366][369..389]	[acetylation][transmembrane region][transmembrane region][transmembrane region][transmembrane region]	[N-acetylalanine; propagated from UniProtKB/Swiss-Prot (Q9BTV4.1)][propagated from UniProtKB/Swiss-Prot (Q9BTV4.1)][propagated from UniProtKB/Swiss-Prot (Q9BTV4.1)][propagated from UniProtKB/Swiss-Prot (Q9BTV4.1)][propagated from UniProtKB/Swiss-Prot (Q9BTV4.1)]
284	2	gi|118498362|ref|NP_001072990.1|;gi|118498368|ref|NP_004977.2|	gi|118498362|ref|NP_001072990.1|	kinectin isoform b [Homo sapiens]	KTN1	1	2	2	1	0	2	1	4.813e-05	0.827586	3	6	6	3	0	6	2.68	5.845e-05	3.25862	4	6	6	4	0	6	3.83	0.00018863	1306	150352	5.7	i7-29o	40	0.551	A	24	14		[458..1246]	[SMC_prok_B]	[chromosome segregation protein SMC, common bacterial type; TIGR02168]	[75][77][79][153][218][242]	[phosphorylation][phosphorylation][phosphorylation][phosphorylation][phosphorylation][phosphorylation]
285	2	gi|14589866|ref|NP_004309.2|;gi|258613943|ref|NP_001158222.1|	gi|14589866|ref|NP_004309.2|	aspartyl/asparaginyl beta-hydroxylase isoform a [Homo sapiens]	ASPH	3	4	4	3	0	4	6.2	0.00016586	0.825871	3	12	12	3	0	12	4.88	0.00020143	2.69652	4	10	10	4	0	10	7.12	0.00054165	758	85863	5	i53-75o	70	0.087	A	65	8	1.14.11.16	[43..310][341..374][341..369][342..455][374..408][454..487][458..482][487..517][489..521][525..557][525..548][589..746][688..690]	[Asp-B-Hydro_N][TPR 1][TPR repeat][tol_pal_ybgF][TPR repeat][TPR 2][TPR repeat][TPR repeat][TPR 3][TPR 4][TPR repeat][Asp_Arg_Hydrox][2-oxoglutarate binding]	[Aspartyl beta-hydroxylase N-terminal region; pfam05279][propagated from UniProtKB/Swiss-Prot (Q12797.3)][TPR repeat [structural motif]][tol-pal system protein YbgF; TIGR02795][TPR repeat [structural motif]][propagated from UniProtKB/Swiss-Prot (Q12797.3)][TPR repeat [structural motif]][TPR repeat [structural motif]][propagated from UniProtKB/Swiss-Prot (Q12797.3)][propagated from UniProtKB/Swiss…	[29][54..74][order(458..459,462..463,465,489,492..493,496..497,]	[phosphorylation][transmembrane region][other]	[][propagated from UniProtKB/Swiss-Prot (Q12797.3)][putative protein binding surface [polypeptide binding]]
286	1	gi|6912482|ref|NP_036450.1|	gi|6912482|ref|NP_036450.1|	LETM1 and EF-hand domain-containing protein 1, mitochondrial precursor [Homo sapiens]	LETM1	3	3	3	3	0	3	5.14	0.0001276	0.825806	3	9	9	3	0	9	6.77	0.00015495	3.94194	4	11	11	4	0	11	7.98	0.00061114	739	83354	6.7	i206-228o	16	0.388	Q	48	4		[150..418][647..691]	[LETM1][EF-hand_8]	[LETM1-like protein; pfam07766][EF-hand domain pair; pfam13833]	[209..229][597]	[transmembrane region][acetylation]	[propagated from UniProtKB/Swiss-Prot (O95202.1)][N6-acetyllysine. {ECO:0000244|PubMed:19608861}; propagated from UniProtKB/Swiss-Prot (O95202.1)]
287	3	gi|281182822|ref|NP_065911.3|;gi|281182836|ref|NP_001162588.1|;gi|281182842|ref|NP_001162589.1|	gi|281182822|ref|NP_065911.3|	stromal interaction molecule 2 isoform 2 precursor [Homo sapiens]	STIM2	1	1	1	1	0	1	2.41	4.213e-05	0.823529	2	3	3	2	0	3	4.02	5.117e-05	2.15686	1	2	2	1	0	2	2.41	0.00011007	746	83971	6.8						4		[132..205][133..197][351..442]	[SAM_STIM2][SAM][SOAR]	[SAM domain of STIM2 subfamily proteins; cd09574][Sterile alpha motif; smart00454][STIM1 Orai1-activating region; cd11722]	[order(136,156,167,183,196,202)][219..235][order(351,354..355,357..358,361..362,365..366,369,][order(352..353,356,441..442)][523][609][621][640][650][661][680][697]	[other][transmembrane region][other][other][phosphorylation][phosphorylation][phosphorylation][phosphorylation][phosphorylation][phosphorylation][phosphorylation][phosphorylation]	[putative oligomer interface [polypeptide binding]][propagated from UniProtKB/Swiss-Prot (Q9P246.2)][dimer interface [polypeptide binding]][putative inhibitory helix interface [polypeptide binding]][Phosphoserine. {ECO:0000250|UniProtKB:P83093}; propagated from UniProtKB/Swiss-Prot (Q9P246.2)][Phosphoserine. {ECO:0000244|PubMed:18669648}; propagated from UniProtKB/Swiss-Prot (Q9P246.2)][Phosphose…
288	1	gi|15055539|ref|NP_002943.2|	gi|15055539|ref|NP_002943.2|	40S ribosomal protein S2 [Homo sapiens]	RPS2	4	13	13	4	0	13	16.04	0.00139455	0.823495	5	39	39	5	0	39	19.8	0.00169357	0.909681	3	11	11	3	0	11	12.29	0.0015414	293	31324	10.2	o	40	0.039	Q	21	16		[54..263][101..167][184..257]	[uS5_euk_arch][Ribosomal_S5][Ribosomal_S5_C]	[ribosomal protein uS5, eukaryotic/archaeal form; TIGR01020][Ribosomal protein S5, N-terminal domain; pfam00333][Ribosomal protein S5, C-terminal domain; pfam03719]	[2][263][264][275][281][281]	[acetylation][acetylation][phosphorylation][acetylation][phosphorylation][phosphorylation]	[N-acetylalanine; propagated from UniProtKB/Swiss-Prot (P15880.2)][N6-acetyllysine; propagated from UniProtKB/Swiss-Prot (P15880.2)][Phosphoserine; propagated from UniProtKB/Swiss-Prot (P15880.2)][N6-acetyllysine; propagated from UniProtKB/Swiss-Prot (P15880.2)][][Phosphoserine; propagated from UniProtKB/Swiss-Prot (P15880.2)]
289	1	gi|9910382|ref|NP_064628.1|	gi|9910382|ref|NP_064628.1|	mitochondrial import receptor subunit TOM22 homolog [Homo sapiens]	TOMM22	2	9	9	2	0	9	16.2	0.0019921	0.823481	2	27	27	2	0	27	16.2	0.00241925	1.79289	2	15	15	2	0	15	19.01	0.00433705	142	15522	4.3	i84-101o	26	0.032	Q	14	22		[41..50][83..103][123..142]	[Import sequence, necessary for mitochondrion outer membrane localization and integration in the TOM complex. {ECO:0000250}][TMD, necessary for mitochondrion outer membrane localization and integration in the TOM complex. {ECO:0000250}][C-tail signal, necessary for mitochondrion outer membrane localization and integration in the TOM complex. {ECO:0000250}]	[propagated from UniProtKB/Swiss-Prot (Q9NS69.3)][propagated from UniProtKB/Swiss-Prot (Q9NS69.3)][propagated from UniProtKB/Swiss-Prot (Q9NS69.3)]	[2][15][15][43][45][84..103]	[acetylation][phosphorylation][phosphorylation][phosphorylation][phosphorylation][transmembrane region]	[N-acetylalanine. {ECO:0000244|PubMed:19413330, ECO:0000244|PubMed:20068231, ECO:0000244|PubMed:21406692, ECO:0000244|PubMed:22223895, ECO:0000244|PubMed:25944712, ECO:0000269|Ref.6}; propagated from UniProtKB/Swiss-Prot (Q9NS69.3)][][Phosphoserine. {ECO:0000244|PubMed:17081983, ECO:0000244|PubMed:20068231, ECO:0000244|PubMed:21406692}; propagated from UniProtKB/Swiss-Prot (Q9NS69.3)][Phosphothre…
290	1	gi|4506661|ref|NP_000963.1|	gi|4506661|ref|NP_000963.1|	60S ribosomal protein L7a [Homo sapiens]	RPL7A	6	15	15	6	0	15	23.68	0.00177242	0.82342	8	45	45	8	0	45	27.82	0.00215247	0.717472	5	10	10	5	0	10	23.68	0.00154351	266	29996	10.6	o	8	0.072	Q	25	9		[16..266][32..252]	[PTZ00365][Ribosomal_L7Ae]	[60S ribosomal protein L7Ae-like; Provisional][Ribosomal protein L7Ae/L30e/S12e/Gadd45 family; cl00600]	[34][97][217]	[acetylation][acetylation][acetylation]	[N6-acetyllysine; propagated from UniProtKB/Swiss-Prot (P62424.2)][N6-acetyllysine; propagated from UniProtKB/Swiss-Prot (P62424.2)][N6-acetyllysine; propagated from UniProtKB/Swiss-Prot (P62424.2)]
291	1	gi|157502212|ref|NP_059119.2|	gi|157502212|ref|NP_059119.2|	N-acetylgalactosaminyltransferase 7 [Homo sapiens]	GALNT7	1	4	4	1	0	4	2.44	0.00019136	0.823276	3	12	12	3	0	12	7.31	0.00023239	16.431	8	61	61	8	0	61	15.98	0.00381203	657	75389	7.1	i7-29o	28	0.611	S	31	4	2.4.1.41	[206..317][210..518][210..>331][381..443][534..649][535..651]	[Catalytic subdomain A][pp-GalNAc-T][WcaA][Catalytic subdomain B][Ricin_B_lectin][RICIN]	[propagated from UniProtKB/Swiss-Prot (Q86SF2.1)][pp-GalNAc-T initiates the formation of mucin-type O-linked glycans; cd02510][Glycosyltransferase involved in cell wall bisynthesis [Cell wall/membrane/envelope biogenesis]; COG0463][propagated from UniProtKB/Swiss-Prot (Q86SF2.1)][Ricin-type beta-trefoil lectin domain; pfam00652][Ricin-type beta-trefoil; Carbohydrate-binding domain formed from pre…	[7..29][order(214..216,218,247,277,280,284,301..303,389..390,][order(301,303,440)][order(547,558,560,568..569,587,596,598,605..606,627,636,][order(569..571,606..608,647..649)]	[transmembrane region][other][other][other][other]	[propagated from UniProtKB/Swiss-Prot (Q86SF2.1)][ligand binding site][Mn binding site][putative sugar binding sites [chemical binding]][Q-X-W motif]
292	1	gi|24475816|ref|NP_612510.1|	gi|24475816|ref|NP_612510.1|	very-long-chain enoyl-CoA reductase [Homo sapiens]	TECR	1	1	1	1	0	1	2.92	0.00010205	0.822581	2	3	3	2	0	3	7.14	0.00012393	6.45161	3	6	6	3	0	6	10.06	0.00079982	308	36034	9.4	i85-107o165-184i196-215o253-275i	31	0.035	Q	0	19	1.3.1.93	[6..81][23..305][155..308]	[Tsc13_N][PLN02560][PEMT]	[Ubiquitin-like domain of Tsc13; cd01801][enoyl-CoA reductase][Phospholipid methyltransferase; cl21511]	[22][58][60][87..107][194..214][255..275]	[acetylation][phosphorylation][acetylation][transmembrane region][transmembrane region][transmembrane region]	[N6-acetyllysine. {ECO:0000244|PubMed:19608861}; propagated from UniProtKB/Swiss-Prot (Q9NZ01.1)][Phosphoserine. {ECO:0000250|UniProtKB:Q64232}; propagated from UniProtKB/Swiss-Prot (Q9NZ01.1)][N6-acetyllysine. {ECO:0000250|UniProtKB:Q9CY27}; propagated from UniProtKB/Swiss-Prot (Q9NZ01.1)][propagated from UniProtKB/Swiss-Prot (Q9NZ01.1)][propagated from UniProtKB/Swiss-Prot (Q9NZ01.1)][propagate…
293	1	gi|7705626|ref|NP_057149.1|	gi|7705626|ref|NP_057149.1|	28S ribosomal protein S16, mitochondrial [Homo sapiens]	MRPS16	1	1	1	1	0	1	13.14	0.00022942	0.820789	1	3	3	1	0	3	13.14	0.00027862	2.14695	1	2	2	1	0	2	13.14	0.00059938	137	15345	9.5	o	25	0.247	Q	25	10		[17..97]	[S16]	[ribosomal protein S16; TIGR00002]	[130]	[phosphorylation]	[Phosphothreonine; propagated from UniProtKB/Swiss-Prot (Q9Y3D3.1)]
294	1	gi|192455698|ref|NP_001008398.2|	gi|192455698|ref|NP_001008398.2|	probable glutathione peroxidase 8 [Homo sapiens]	GPX8	1	1	1	1	0	1	5.26	0.00015039	0.819672	2	3	3	2	0	3	11	0.00018263	1.07104	1	1	1	1	0	1	5.26	0.00019645	209	23881	9.4						5	1.11.1.9	[46..194]	[GSH_Peroxidase]	[Glutathione (GSH) peroxidase family; tetrameric selenoenzymes that catalyze the reduction of a variety of hydroperoxides including lipid peroxidases, using GSH as a specific electron donor substrate. GSH peroxidase contains one selenocysteine residue per...; cd00340]	[1][18..40][order(79,114,164)][order(113,116,118,121,124,128)]	[acetylation][transmembrane region][active][other]	[N-acetylmethionine. {ECO:0000244|PubMed:22814378}; propagated from UniProtKB/Swiss-Prot (Q8TED1.2)][propagated from UniProtKB/Swiss-Prot (Q8TED1.2)][catalytic residues [active]][dimer interface [polypeptide binding]]
295	1	gi|528281407|ref|NP_001268644.1|	gi|528281407|ref|NP_001268644.1|	prohibitin isoform 1 [Homo sapiens]	PHB	8	40	40	8	0	40	34.19	0.0046222	0.803267	8	123	123	8	0	123	37.5	0.00575362	0.419708	5	16	16	5	0	16	22.06	0.00241514	272	29804	5.8	o	26	0.462	S	26	17		[13..>231][27..221]	[HflC][SPFH_prohibitin]	[Regulator of protease activity HflC, stomatin/prohibitin superfamily [Posttranslational modification, protein turnover, chaperones]; COG0330][Prohibitin family; SPFH (stomatin, prohibitin, flotillin, and HflK/C) superfamily; cd03401]	[202]	[acetylation]	[N6-acetyllysine, alternate; propagated from UniProtKB/Swiss-Prot (P35232.1)]
296	1	gi|8923579|ref|NP_060377.1|	gi|8923579|ref|NP_060377.1|	ragulator complex protein LAMTOR1 [Homo sapiens]	LAMTOR1	4	12	12	4	0	12	40.99	0.00234268	0.8013	5	37	37	5	0	37	48.45	0.00292403	0.523256	2	6	6	2	0	6	16.15	0.00153009	161	17745	5.1	o	33	0.02	Q	0	11		[15..88][121..161]	[LAMTOR][Interaction with LAMTOR2 and LAMTOR3 (By similarity)]	[Late endosomal/lysosomal adaptor and MAPK and MTOR activator; pfam15454][propagated from UniProtKB/Swiss-Prot (Q6IAA8.2)]	[27][40]	[phosphorylation][phosphorylation]	[Phosphoserine; propagated from UniProtKB/Swiss-Prot (Q6IAA8.2)][]
297	2	gi|19923315|ref|NP_005403.2|;gi|261862352|ref|NP_001159831.1|	gi|19923315|ref|NP_005403.2|	serine hydroxymethyltransferase, mitochondrial isoform 1 precursor [Homo sapiens]	SHMT2	8	36	36	8	0	36	20.24	0.00224507	0.801213	10	111	111	10	0	111	28.37	0.00280219	0.0581727	1	2	2	1	0	2	3.57	0.00016293	504	55993	8.5	o	19	0.324	Q	32	12	2.1.2.1	[51..465]	[SHMT]	[Serine-glycine hydroxymethyltransferase (SHMT). This family belongs to pyridoxal phosphate (PLP)-dependent aspartate aminotransferase superfamily (fold I). SHMT carries out interconversion of serine and glycine; it catalyzes the transfer of hydroxymethyl...; cd00378]	[order(53,55,62..63,72,77,95,113..114,122,141,148,188..189,][order(76,96,106,143..144,171,226,251,254,279..280,286,425)][order(76,171,280,425)][order(98,105,166,170,172,320,410)][103][181][196][280][297][356][464][469][474]	[other][other][active][other][acetylation][acetylation][acetylation][modified][acetylation][acetylation][acetylation][acetylation][acetylation]	[dimer interface [polypeptide binding]][glycine-pyridoxal phosphate binding site [chemical binding]][][folate binding site [chemical binding]][N6-acetyllysine. {ECO:0000244|PubMed:19608861}; propagated from UniProtKB/Swiss-Prot (P34897.3)][N6-acetyllysine. {ECO:0000244|PubMed:19608861}; propagated from UniProtKB/Swiss-Prot (P34897.3)][N6-acetyllysine. {ECO:0000244|PubMed:19608861}; propagated fro…
298	1	gi|24638454|ref|NP_733765.1|	gi|24638454|ref|NP_733765.1|	sarcoplasmic/endoplasmic reticulum calcium ATPase 2 isoform b [Homo sapiens]	ATP2A2	11	26	8	4	18	26	14.68	0.00078427	0.79272	17	81	44	10	37	81	23.32	0.00098906	14.2235	24	357	228	15	129	357	31.29	0.0140667	1042	114757	5.3	i60-79o84-106i260-279o299-321i759-781o836-858i930-952o1013-1030i	7	0.037	Q	24	12	3.6.3.8	[4..72][53..988][93..341][370..400][418..527][575..594][<597..711][783..986][787..807]	[Cation_ATPase_N][ATPase-IIA1_Ca][E1-E2_ATPase][Interacts with phospholamban 1. {ECO:0000250}][Hydrolase_like2][Interacts with HAX1][HAD][Cation_ATPase_C][Interacts with phospholamban 2. {ECO:0000250}]	[Cation transporter/ATPase, N-terminus; pfam00690][sarco/endoplasmic reticulum calcium-translocating P-type ATPase; TIGR01116][E1-E2 ATPase; pfam00122][propagated from UniProtKB/Swiss-Prot (P16615.1)][Putative hydrolase of sodium-potassium ATPase alpha subunit; pfam13246][propagated from UniProtKB/Swiss-Prot (P16615.1)][haloacid dehalogenase-like hydrolase; pfam12710][Cation transporting ATPase, …	[38][38][49..69][90..110][254..273][294][295][296..313][531][580][624][663][663][757..776][787..807][828..850][897..916][930..948][964..984]	[phosphorylation][phosphorylation][transmembrane region][transmembrane region][transmembrane region][modified][modified][transmembrane region][phosphorylation][phosphorylation][other][phosphorylation][phosphorylation][transmembrane region][transmembrane region][transmembrane region][transmembrane region][transmembrane region][transmembrane region]	[][Phosphoserine. {ECO:0000250|UniProtKB:O55143}; propagated from UniProtKB/Swiss-Prot (P16615.1)][propagated from UniProtKB/Swiss-Prot (P16615.1)][propagated from UniProtKB/Swiss-Prot (P16615.1)][propagated from UniProtKB/Swiss-Prot (P16615.1)][Nitrated tyrosine. {ECO:0000269|PubMed:16399855}; propagated from UniProtKB/Swiss-Prot (P16615.1)][Nitrated tyrosine. {ECO:0000269|PubMed:16399855}; prop…
299	1	gi|42741659|ref|NP_000918.2|	gi|42741659|ref|NP_000918.2|	multidrug resistance protein 1 [Homo sapiens]	ABCB1	7	14	14	7	0	14	7.5	0.00034378	0.787185	7	44	44	7	0	44	7.03	0.00043737	1.73913	7	24	22	6	2	23.6923	6.56	0.00075996	1280	141478	9	i49-71o114-136i190-212o217-239i295-317o710-732i753-775o852-874i937-959o974-996i	63	0.035	Q	0	7	3.6.3.44	[51..345][53..1267][393..629][715..991][1035..1274]	[ABC_membrane][PTZ00265][ABC_MTABC3_MDL1_MDL2][ABC_membrane][ABC_MTABC3_MDL1_MDL2]	[ABC transporter transmembrane region; pfam00664][multidrug resistance protein (mdr1); Provisional][ATP-binding cassette domain of a mitochondrial protein MTABC3 and related proteins; cd03249][ABC transporter transmembrane region; pfam00664][ATP-binding cassette domain of a mitochondrial protein MTABC3 and related proteins; cd03249]	[45..67][117..137][187..208][216..236][293..316][331..352][427..434][order(430..431,433..435,475,555..556,587)][472..475][531..540][551..556][559..562][583..589][661][667][671][683][712..732][757..777][833..853][855..874][935..957][974..995][1070..1077][order(1073..1074,1076..1078,1118,1200..1201,1232)][1115..1118][1176..1185][1196..1201][1204..1207][1228..1234]	[transmembrane region][transmembrane region][transmembrane region][transmembrane region][transmembrane region][transmembrane region][other][other][other][other][other][other][other][phosphorylation][phosphorylation][phosphorylation][phosphorylation][transmembrane region][transmembrane region][transmembrane region][transmembrane region][transmembrane region][transmembrane region][other][other][oth…	[propagated from UniProtKB/Swiss-Prot (P08183.3)][propagated from UniProtKB/Swiss-Prot (P08183.3)][propagated from UniProtKB/Swiss-Prot (P08183.3)][propagated from UniProtKB/Swiss-Prot (P08183.3)][propagated from UniProtKB/Swiss-Prot (P08183.3)][propagated from UniProtKB/Swiss-Prot (P08183.3)][Walker A/P-loop][ATP binding site [chemical binding]][Q-loop/lid][ABC transporter signature motif][Walke…
300	1	gi|24308324|ref|NP_115604.1|	gi|24308324|ref|NP_115604.1|	fatty acyl-CoA reductase 1 [Homo sapiens]	FAR1	2	6	6	2	0	6	6.21	0.00036619	0.780384	10	19	19	10	0	19	22.72	0.00046941	4.07889	10	24	24	10	0	24	24.85	0.00191335	515	59357	9.2	o466-483i	40	0.104	Q	28	11	1.2.1.n2	[11..330][15..284][355..446]	[FAR-N_SDR_e][NAD_binding_4][FAR_C]	[fatty acyl CoA reductases (FARs), extended (e) SDRs; cd05236][Male sterility protein; pfam07993][C-terminal domain of fatty acyl CoA reductases; cd09071]	[order(17,19..22,44..46,111..113,130,151..153,204,208,][order(131,153,204,208)][order(153,204,231,243,259,265)][466..483]	[other][active][other][transmembrane region]	[putative NAD(P) binding site [chemical binding]][][putative substrate binding site [chemical binding]][propagated from UniProtKB/Swiss-Prot (Q8WVX9.1)]
301	1	gi|4506693|ref|NP_001012.1|	gi|4506693|ref|NP_001012.1|	40S ribosomal protein S17 [Homo sapiens]	RPS17	3	17	17	3	0	17	40	0.00395797	0.777756	5	54	54	5	0	54	55.56	0.00508939	0.239143	2	4	4	2	0	4	32.59	0.00121652	135	15550	9.8	i	7	0.131	Q	0	15		[1..122]	[Ribosomal_S17e]	[Ribosomal S17; pfam00833]	[113][113][130]	[phosphorylation][phosphorylation][phosphorylation]	[][Phosphoserine; propagated from UniProtKB/Swiss-Prot (P08708.2)][Phosphothreonine; propagated from UniProtKB/Swiss-Prot (P08708.2)]
302	1	gi|50345984|ref|NP_001001937.1|	gi|50345984|ref|NP_001001937.1|	ATP synthase subunit alpha, mitochondrial isoform a precursor [Homo sapiens]	ATP5A1	17	312	312	17	0	312	39.06	0.0177332	0.776945	21	992	992	21	0	992	43.4	0.022824	0.0032422	1	1	1	1	0	1	2.71	7.424e-05	553	59751	9.1	o	14	0.419	Q	39	18		[49..553][69..135][137..418][427..521]	[PRK09281][ATP-synt_ab_N][F1_ATPase_alpha][ATP-synt_ab_C]	[F0F1 ATP synthase subunit alpha; Validated][ATP synthase alpha/beta family, beta-barrel domain; pfam02874][F1 ATP synthase alpha, central domain. The F-ATPase is found in bacterial plasma membranes, mitochondrial inner membranes and in chloroplast thylakoid membranes. It has also been found in the archaea Methanosarcina barkeri. It uses a proton gradient to...; cd01132][ATP synthase alpha/beta c…	[44][76][123][126][132][order(158..159,175..176,178..179,182,184,214..215,][161][161][166][167][167][212..219][order(214,218..220,246,251,312..313,316,371,387,400,][230][230][239][239][240][261][261][305][305][308..312][413][427][427][434][498][498][506][506][531][531][539][539][541]	[other][phosphorylation][acetylation][acetylation][acetylation][other][acetylation][modified][phosphorylation][acetylation][modified][other][other][acetylation][modified][acetylation][modified][acetylation][acetylation][modified][acetylation][modified][other][other][acetylation][modified][acetylation][acetylation][modified][acetylation][modified][acetylation][modified][acetylation][modified][acet…	[. {ECO:0000250}; propagated from UniProtKB/Swiss-Prot (P25705.1)][Phosphoserine. {ECO:0000250}; propagated from UniProtKB/Swiss-Prot (P25705.1)][N6-acetyllysine. {ECO:0000250}; propagated from UniProtKB/Swiss-Prot (P25705.1)][N6-acetyllysine. {ECO:0000250}; propagated from UniProtKB/Swiss-Prot (P25705.1)][N6-acetyllysine. {ECO:0000250}; propagated from UniProtKB/Swiss-Prot (P25705.1)][beta subun…
303	1	gi|112382252|ref|NP_842565.2|	gi|112382252|ref|NP_842565.2|	spectrin beta chain, non-erythrocytic 1 isoform 2 [Homo sapiens]	SPTBN1	31	72	72	31	0	72	20.46	0.00105013	0.776627	50	229	229	50	0	229	32.9	0.00135205	0.0421598	3	3	3	3	0	3	2.55	5.716e-05	2155	251395	5.5	o	19	0.075	Q	19	2		[42..145][161..264][289..399][409..512][517..730][629..836][838..1048][945..1156][975..1236][1158..1367][1368..1579][1580..1792][1793..2014][2004..>2062]	[CH][CH][Spectrin][Spectrin][SPEC][SPEC][SPEC][SPEC][Laminin_I][SPEC][SPEC][SPEC][SPEC][Spectrin]	[Calponin homology domain; actin-binding domain which may be present as a single copy or in tandem repeats (which increases binding affinity). The CH domain is found in cytoskeletal and signal transduction proteins, including actin-binding proteins like...; cd00014][Calponin homology domain; actin-binding domain which may be present as a single copy or in tandem repeats (which increases binding a…	[order(42..43,45..47,50,53,107..108,111,114,116,131..132,][order(161..162,164..166,169,172,225..226,229,233,235,][333][624..629][730..735][783][795][941..946][1048..1053][1095][1261..1266][1471..1476][1684..1689][1897..1902][1944][2089][2089][2093][2115][2125][2125]	[other][other][phosphorylation][other][other][phosphorylation][phosphorylation][other][other][modified][other][other][other][other][modified][phosphorylation][phosphorylation][phosphorylation][phosphorylation][phosphorylation][phosphorylation]	[putative actin binding surface [polypeptide binding]][putative actin binding surface [polypeptide binding]][][linker region][linker region][][][linker region][linker region][sumoylation site][linker region][linker region][linker region][linker region][sumoylation site][][][][][][]
304	1	gi|4507241|ref|NP_003137.1|	gi|4507241|ref|NP_003137.1|	FACT complex subunit SSRP1 [Homo sapiens]	SSRP1	2	5	5	2	0	5	3.1	0.00022166	0.773519	6	16	16	6	0	16	12.55	0.00028713	0.404181	2	2	2	2	0	2	5.08	0.00011582	709	81075	6.9	o	46	0.015	Q	0	11		[21..480][194..330][332..427][547..612]	[POB3][PH1_SSRP1-like][PH2_SSRP1-like][HMGB-UBF_HMG-box]	[Nucleosome-binding factor SPN, POB3 subunit [Transcription / DNA replication, recombination, and repair / Chromatin structure and dynamics]; COG5165][Structure Specific Recognition protein 1 (SSRP1) Pleckstrin homology (PH) domain, repeat 1; cd13230][Structure Specific Recognition protein 1 (SSRP1) Pleckstrin homology (PH) domain, repeat 2; cd13231][HMGB-UBF_HMG-box, class II and III members of …	[2][170][233][311][413][437][437][438][444][444][450..451][452][510][order(549,551..552,554..555,558..559,562,566,579,582,585,][554][561][657][657][659][667][667][668][668][671][671][672][672][673][673][688]	[acetylation][phosphorylation][acetylation][phosphorylation][acetylation][phosphorylation][phosphorylation][phosphorylation][phosphorylation][phosphorylation][cleavage][phosphorylation][phosphorylation][DNA binding][phosphorylation][phosphorylation][phosphorylation][phosphorylation][phosphorylation][phosphorylation][phosphorylation][phosphorylation][phosphorylation][phosphorylation][phosphorylati…	[N-acetylalanine; propagated from UniProtKB/Swiss-Prot (Q08945.1)][Phosphothreonine; propagated from UniProtKB/Swiss-Prot (Q08945.1)][N6-acetyllysine; propagated from UniProtKB/Swiss-Prot (Q08945.1)][][N6-acetyllysine; propagated from UniProtKB/Swiss-Prot (Q08945.1)][][Phosphoserine; propagated from UniProtKB/Swiss-Prot (Q08945.1)][][][Phosphoserine; propagated from UniProtKB/Swiss-Prot (Q08945.1…
305	1	gi|19743823|ref|NP_596867.1|	gi|19743823|ref|NP_596867.1|	integrin beta-1 isoform 1A precursor [Homo sapiens]	ITGB1	9	34	34	9	0	34	15.41	0.00133916	0.763398	11	110	110	11	0	110	15.54	0.00175386	3.05074	7	104	104	7	0	104	11.78	0.00535084	798	88415	5.4	o729-751i	21	0.84	S	21	10		[34..464][466..635][640..728][757..797][762..767][785..792]	[Integrin_beta][Cysteine-rich tandem repeats][Integrin_B_tail][Integrin_b_cyt][Signal for sorting from recycling endosomes, interaction with ACAP1][Interaction with ITGB1BP1]	[Integrin, beta chain; pfam00362][propagated from UniProtKB/Swiss-Prot (P05556.2)][Integrin beta tail domain; pfam07965][Integrin beta cytoplasmic domain; pfam08725][propagated from UniProtKB/Swiss-Prot (P05556.2)][propagated from UniProtKB/Swiss-Prot (P05556.2)]	[50][50][97][212][269][363][406][417][481][520][669][729..751][777][783][783][785][789][794]	[glycosylation][glycosylation][glycosylation][glycosylation][glycosylation][glycosylation][glycosylation][glycosylation][glycosylation][glycosylation][glycosylation][transmembrane region][phosphorylation][phosphorylation][phosphorylation][phosphorylation][phosphorylation][acetylation]	[][glucuronosyl transfer site][][][][][][][][][][propagated from UniProtKB/Swiss-Prot (P05556.2)][Phosphothreonine. {ECO:0000244|PubMed:19690332}; propagated from UniProtKB/Swiss-Prot (P05556.2)][][Phosphotyrosine. {ECO:0000250|UniProtKB:P09055}; propagated from UniProtKB/Swiss-Prot (P05556.2)][Phosphoserine. {ECO:0000244|PubMed:24275569}; propagated from UniProtKB/Swiss-Prot (P05556.2)][Phosphot…
306	1	gi|38201690|ref|NP_002877.2|	gi|38201690|ref|NP_002877.2|	ras-related protein Rap-2b [Homo sapiens]	RAP2B	5	16	6	2	10	12.6667	40.98	0.00217555	0.762973	10	46	29	6	17	41.0244	62.84	0.00285231	0.314516	2	5	3	1	2	4	20.77	0.00089743	183	20504	4.8	o	27	0.109	Q	19	3		[3..165][16..164][32..40]	[Rap2][Ras][Effector region (Probable)]	[Rap2 family GTPase consists of Rap2a, Rap2b, and Rap2c; cd04176][Ras family; pfam00071][propagated from UniProtKB/Swiss-Prot (P61225.1)]	[10..17][order(11..12,59..60)][order(13..18,28..31,116..117,119,146..147)][order(17..18,32,34,40..41,54..55,57,59..60,148)][order(25,31,33,36..41)][33..40][35][57..60][order(59..65,68..73,76..77)][116..119][146..148]	[other][other][other][other][other][other][other][other][other][other][other]	[G1 box][putative GDI interaction site [polypeptide binding]][GTP/Mg2+ binding site [chemical binding]][putative GEF interaction site [polypeptide binding]][putative effector interaction site][Switch I region][G2 box][G3 box][Switch II region][G4 box][G5 box]
307	1	gi|41322923|ref|NP_958786.1|	gi|41322923|ref|NP_958786.1|	plectin isoform 1a [Homo sapiens]	PLEC	49	132	132	49	0	132	14.08	0.00091244	0.761269	74	428	428	74	0	428	19.42	0.00119763	0.602671	32	80	80	32	0	80	9.21	0.00072236	4547	516204	5.8	o	36	0.043	Q	36	8		[43..145][160..259][522..711][618..807][1102..1292][<1337..1442][1385..1932][1474..1598][1677..2479][1726..1928][2320..>2398][2691..2733][2729..2771][2766..2802][2803..2847][3017..3061][3057..3099][3094..3130][3131..3175][3350..3384][3395..3430][3425..3456][3462..3506][3685..3727][3723..3765][3760..3796][3797..3841][3926..3963][3966..4008][4040..4084][<4143..4175][4275..4308][4309..4353][4385..44…	[CH][CH][SPEC][SPEC][SPEC][SPFH_like][WEMBL][Tropomyosin_1][Myosin_tail_1][SPEC][HemX][Plectin][Plectin][PLEC][Plectin][Plectin][Plectin][PLEC][Plectin][PLEC][Plectin][PLEC][Plectin][Plectin][Plectin][PLEC][Plectin][PLEC][Plectin][Plectin][Plectin][PLEC][Plectin][Plectin]	[Calponin homology domain; actin-binding domain which may be present as a single copy or in tandem repeats (which increases binding affinity). The CH domain is found in cytoskeletal and signal transduction proteins, including actin-binding proteins like...; cd00014][Calponin homology domain; actin-binding domain which may be present as a single copy or in tandem repeats (which increases binding a…	[19][20][21][order(43..44,46..48,51,54,107..108,111,114,116,131..132,][order(160,162..164,167,170,223..224,227,231,233,249..250,][583][617..620][721..726][1205..1210][1298][1298][1507][1584][1812..1817][2260][2618][2677][3893][4018][4237][4245][4247][4247][4248][4249][4252][4253][4254][4255][4256][4259][4265][4274][4402][4474][4475][4476][4481][4483][4485][4486][4489][4509][4511]	[phosphorylation][phosphorylation][phosphorylation][other][other][phosphorylation][other][other][other][phosphorylation][phosphorylation][phosphorylation][phosphorylation][other][modified][phosphorylation][phosphorylation][phosphorylation][phosphorylation][phosphorylation][phosphorylation][phosphorylation][phosphorylation][phosphorylation][phosphorylation][phosphorylation][phosphorylation][phosph…	[][][][putative actin binding surface [polypeptide binding]][putative actin binding surface [polypeptide binding]][][linker region][linker region][linker region][][][][][linker region][proteolytic cleavage site][][][][][][][][][][][][][][][][][][][][][][][][][][][][][]
308	1	gi|195976760|ref|NP_001124451.1|	gi|195976760|ref|NP_001124451.1|	dysferlin isoform 12 [Homo sapiens]	DYSF	7	11	10	6	1	10.0417	5.26	0.00014951	0.757576	13	46	32	12	14	32.8312	9.81	0.00019788	1.99495	11	23	20	10	3	20.3046	7.53	0.00039491	2111	240646	5.7						2		[20..133][248..357][334..405][411..585][725..790][817..892][906..964][977..1033][1183..1311][1610..1733][1844..1975]	[C2A_Ferlin][C2B_Ferlin][FerI][C2C_Ferlin][FerA][FerB][DysFN][DysFN][C2D_Ferlin][C2E_Ferlin][C2F_Ferlin]	[C2 domain first repeat in Ferlin; cd08373][C2 domain second repeat in Ferlin; cd04011][FerI (NUC094) domain; pfam08151][C2 domain third repeat in Ferlin; cd04018][FerA (NUC095) domain; pfam08165][FerB (NUC096) domain; pfam08150][Dysferlin domain, N-terminal region; smart00693][Dysferlin domain, N-terminal region; smart00693][C2 domain fourth repeat in Ferlin; cd04017][C2 domain fifth repeat in F…	[order(442,448,496,498,510,512)][order(1199,1205,1261,1263)][order(1625,1631,1680,1682,1687)][2078..2098]	[other][other][other][transmembrane region]	[Ca2+ binding site [ion binding]][putative Ca2+ binding site [ion binding]][Ca2+ binding site [ion binding]][propagated from UniProtKB/Swiss-Prot (O75923.1)]
309	1	gi|12667788|ref|NP_002464.1|	gi|12667788|ref|NP_002464.1|	myosin-9 [Homo sapiens]	MYH9	24	56	53	22	3	55.2083	18.47	0.00088533	0.748098	32	188	163	28	25	182.222	22.7	0.0011829	0.0710059	3	4	4	3	0	4	2.7	8.379e-05	1960	226530	5.6	o	29	0.023	Q	0	22		[29..71][83..764][95..764][654..676][971..1149][1055..>1208][1066..1923][<1206..1263][1523..1647]	[Myosin_N][Myosin_head][Motor_domain][Actin-binding][Lebercilin][GluZincin][Myosin_tail_1][RRF][TMF_TATA_bd]	[Myosin N-terminal SH3-like domain; pfam02736][Myosin head (motor domain); pfam00063][Myosin and Kinesin motor domain; cl22853][propagated from UniProtKB/Swiss-Prot (P35579.4)][Ciliary protein causing Leber congenital amaurosis disease; pfam15619][Peptidase Gluzincin family (thermolysin-like proteinases, TLPs) includes peptidases M1, M2, M3, M4, M13, M32 and M36 (fungalysins); cl14813][Myosin tai…	[2][8][11][91][102][order(122..123,174..181,224..225,452..457)][299][613][628][754][754][850][860][896][917][975][1024][1114][1249][1357][1392][1404][1408][1410][1459][1638][1669][1714][1793][1802][1845][1943][1943][1943]	[acetylation][acetylation][phosphorylation][modified][acetylation][other][acetylation][acetylation][phosphorylation][phosphorylation][phosphorylation][modified][acetylation][modified][modified][acetylation][acetylation][phosphorylation][acetylation][acetylation][acetylation][acetylation][phosphorylation][acetylation][acetylation][acetylation][modified][phosphorylation][acetylation][acetylation][a…	[N-acetylalanine. {ECO:0000269|Ref.10}; propagated from UniProtKB/Swiss-Prot (P35579.4)][N6-acetyllysine. {ECO:0000244|PubMed:19608861}; propagated from UniProtKB/Swiss-Prot (P35579.4)][Phosphotyrosine. {ECO:0000244|PubMed:19690332}; propagated from UniProtKB/Swiss-Prot (P35579.4)][S-nitrosylation site][N6-acetyllysine. {ECO:0000244|PubMed:19608861}; propagated from UniProtKB/Swiss-Prot (P35579.4…
310	5	gi|5031973|ref|NP_005733.1|;gi|544186032|ref|NP_001269633.1|;gi|544186036|ref|NP_001269635.1|;gi|544186040|ref|NP_001269636.1|;gi|544186046|ref|NP_001269634.1|	gi|5031973|ref|NP_005733.1|	protein disulfide-isomerase A6 isoform d precursor [Homo sapiens]	PDIA6	6	25	25	6	0	25	23.86	0.00178585	0.744167	7	83	83	7	0	83	25.91	0.00240011	0.03875	1	1	1	1	0	1	5.45	9.331e-05	440	48121	5.1	o	20	0.828	S	20	2	5.3.4.1	[25..262][26..128][161..266][275..404][437..440]	[ER_PDI_fam][PDI_a_P5][PDI_a_P5][P5_C][Prevents secretion from ER. {ECO:0000255|PROSITE-ProRule:PRU10138}]	[protein disulfide isomerase, eukaryotic; TIGR01130][PDIa family, P5 subfamily; composed of eukaryotic proteins similar to human P5, a PDI-related protein with a domain structure of aa'b (where a and a' are redox active TRX domains and b is a redox inactive TRX-like domain). Like PDI, P5 is located in the...; cd03001][PDIa family, P5 subfamily; composed of eukaryotic proteins similar to human P5,…	[order(55,58,118)][56][57][118][129][156][order(190,193,256)][191][192][256][428][428]	[active][other][other][other][phosphorylation][phosphorylation][active][other][other][other][phosphorylation][phosphorylation]	[catalytic residues [active]][Contributes to redox potential value. {ECO:0000250}; propagated from UniProtKB/Swiss-Prot (Q15084.1)][Contributes to redox potential value. {ECO:0000250}; propagated from UniProtKB/Swiss-Prot (Q15084.1)][Lowers pKa of C-terminal Cys of first active site. {ECO:0000250}; propagated from UniProtKB/Swiss-Prot (Q15084.1)][Phosphoserine. {ECO:0000244|PubMed:24275569}; prop…
311	1	gi|33589861|ref|NP_006859.2|	gi|33589861|ref|NP_006859.2|	ras-related protein Rab-31 [Homo sapiens]	RAB31	1	3	0	0	3	1.5	5.64	0.00024178	0.742331	2	8	2	1	6	5	13.33	0.00032624	11.8988	4	20	14	3	6	18.4211	27.18	0.00387857	195	21700	7.1	o	19	0.212	Q	19	18		[6..168][8..168]	[Rab5_related][Ras]	[Rab-related GTPase family includes Rab5 and Rab22; regulates early endosome fusion; cd01860][Ras family; pfam00071]	[6..8][13..20][order(15..21,31..32,37..38,64,119..120,122,149..151)][order(21..32,36..37)][order(31,36..44)][order(36,40..47,54,56)][36][38][order(39..40,42,60..61,68,70,72..74)][39..43][order(41..43,45,67,74..75)][56..60][61..64][order(64,66..76)][67..72][75..76][84..89][111..116][119..122][149..151][165..167]	[other][other][other][other][other][other][phosphorylation][other][other][other][other][other][other][other][other][other][other][other][other][other][other]	[Rab subfamily motif 1 (RabSF1)][G1 box][GTP/Mg2+ binding site [chemical binding]][Rab subfamily motif 2 (RabSF2)][Switch I region][putative GEF interaction site [polypeptide binding]][][G2 box][putative GDI interaction site [polypeptide binding]][Rab family motif 1 (RabF1)][effector interaction site][Rab family motif 2 (RabF2)][G3 box][Switch II region][Rab family motif 3 (RabF3)][Rab family mot…
312	1	gi|17158044|ref|NP_001001.2|	gi|17158044|ref|NP_001001.2|	40S ribosomal protein S6 [Homo sapiens]	RPS6	3	3	3	3	0	3	15.26	0.00037869	0.741683	3	10	10	3	0	10	18.07	0.00051098	2.90411	4	9	9	4	0	9	20.48	0.001484	249	28681	10.8	o	13	0.051	Q	16	9		[1..215]	[Ribosomal_S6e]	[Ribosomal protein S6e; cl00931]	[211][235][235][235][236][236][236][240][240][240][241][242][242][244][244][247][247]	[acetylation][phosphorylation][phosphorylation][phosphorylation][phosphorylation][phosphorylation][phosphorylation][phosphorylation][phosphorylation][phosphorylation][phosphorylation][phosphorylation][phosphorylation][phosphorylation][phosphorylation][phosphorylation][phosphorylation]	[N6-acetyllysine; propagated from UniProtKB/Swiss-Prot (P62753.1)][][][][][][][][][][][][Phosphoserine; propagated from UniProtKB/Swiss-Prot (P62753.1)][][][][]
313	1	gi|10190714|ref|NP_065724.1|	gi|10190714|ref|NP_065724.1|	ras-related protein Rab-22A [Homo sapiens]	RAB22A	1	3	0	0	3	1.5	5.67	0.00024302	0.740854	2	8	2	1	6	5	16.49	0.00032792	4.2439	3	11	5	2	6	6.57895	23.71	0.00139234	194	21855	8.2	o	18	0.18	Q	18	20		[5..167][7..167][34..42]	[Rab5_related][Ras][Effector region (By similarity)]	[Rab-related GTPase family includes Rab5 and Rab22; regulates early endosome fusion; cd01860][Ras family; pfam00071][propagated from UniProtKB/Swiss-Prot (Q9UL26.2)]	[5..7][12..19][order(14..20,30..31,36..37,63,118..119,121,148..150)][order(20..31,35..36)][order(30,35..43)][order(35,39..46,53,55)][37][order(38..39,41,59..60,67,69,71..73)][38..42][order(40..42,44,66,73..74)][55..59][60..63][order(63,65..75)][66..71][74..75][83..88][110..115][118..121][148..150][164..166]	[other][other][other][other][other][other][other][other][other][other][other][other][other][other][other][other][other][other][other][other]	[Rab subfamily motif 1 (RabSF1)][G1 box][GTP/Mg2+ binding site [chemical binding]][Rab subfamily motif 2 (RabSF2)][Switch I region][putative GEF interaction site [polypeptide binding]][G2 box][putative GDI interaction site [polypeptide binding]][Rab family motif 1 (RabF1)][effector interaction site][Rab family motif 2 (RabF2)][G3 box][Switch II region][Rab family motif 3 (RabF3)][Rab family motif…
314	1	gi|354721184|ref|NP_001238968.1|	gi|354721184|ref|NP_001238968.1|	ras-related protein Rab-5C isoform b [Homo sapiens]	RAB5C	3	12	6	1	6	9	14.46	0.00113606	0.724952	6	36	23	3	13	30.6667	31.73	0.00156701	4.44927	5	44	40	4	4	42.2857	32.93	0.00697246	249	27036	8.7						17		[54..216][56..217]	[Rab5_related][Ras]	[Rab-related GTPase family includes Rab5 and Rab22; regulates early endosome fusion; cd01860][Ras family; pfam00071]	[54..56][61..68][order(63..69,79..80,85..86,112,167..168,170,197..199)][order(69..80,84..85)][order(79,84..92)][order(84,88..95,102,104)][86][order(87..88,90,108..109,116,118,120..122)][87..91][order(89..91,93,115,122..123)][104..108][109..112][order(112,114..124)][115..120][123..124][132..137][159..164][167..170][197..199][213..215]	[other][other][other][other][other][other][other][other][other][other][other][other][other][other][other][other][other][other][other][other]	[Rab subfamily motif 1 (RabSF1)][G1 box][GTP/Mg2+ binding site [chemical binding]][Rab subfamily motif 2 (RabSF2)][Switch I region][putative GEF interaction site [polypeptide binding]][G2 box][putative GDI interaction site [polypeptide binding]][Rab family motif 1 (RabF1)][effector interaction site][Rab family motif 2 (RabF2)][G3 box][Switch II region][Rab family motif 3 (RabF3)][Rab family motif…
315	1	gi|19920317|ref|NP_006816.2|	gi|19920317|ref|NP_006816.2|	cytoskeleton-associated protein 4 [Homo sapiens]	CKAP4	7	24	24	7	0	24	14.29	0.00125306	0.723024	8	82	82	8	0	82	14.29	0.0017331	3.62089	7	92	92	7	0	92	12.79	0.00627455	602	66023	5.9	i109-131o	7	0.048	Q	24	12		[194..>296]	[Ran-binding]	[RanGTP-binding protein; pfam05508]	[3][17][19][19][107..127][312]	[phosphorylation][phosphorylation][phosphorylation][phosphorylation][transmembrane region][phosphorylation]	[Phosphoserine; propagated from UniProtKB/Swiss-Prot (Q07065.2)][Phosphoserine; propagated from UniProtKB/Swiss-Prot (Q07065.2)][][Phosphoserine; propagated from UniProtKB/Swiss-Prot (Q07065.2)][propagated from UniProtKB/Swiss-Prot (Q07065.2)][Phosphoserine; propagated from UniProtKB/Swiss-Prot (Q07065.2)]
316	1	gi|221307584|ref|NP_001138303.1|	gi|221307584|ref|NP_001138303.1|	prohibitin-2 isoform 1 [Homo sapiens]	PHB2	9	52	52	9	0	52	39.46	0.00546625	0.721679	12	178	178	12	0	178	53.85	0.0075745	2.33879	9	129	129	9	0	129	36.12	0.0177137	299	33296	9.8	o	34	0.3	S	34	12		[19..49][39..276][40..235][150..174]	[Necessary for transcriptional repression. {ECO:0000269|PubMed:10359819}][hflC][SPFH_prohibitin][Necessary for transcriptional repression. {ECO:0000269|PubMed:10359819}]	[propagated from UniProtKB/Swiss-Prot (Q99623.2)][HflC protein; TIGR01932][Prohibitin family; SPFH (stomatin, prohibitin, flotillin, and HflK/C) superfamily; cd03401][propagated from UniProtKB/Swiss-Prot (Q99623.2)]	[2][128][147][200][236][250][262]	[acetylation][phosphorylation][acetylation][acetylation][acetylation][acetylation][acetylation]	[N-acetylalanine. {ECO:0000269|PubMed:22814378, ECO:0000269|Ref.8}; propagated from UniProtKB/Swiss-Prot (Q99623.2)][Phosphotyrosine. {ECO:0000269|PubMed:15592455}; propagated from UniProtKB/Swiss-Prot (Q99623.2)][N6-acetyllysine. {ECO:0000250|UniProtKB:O35129}; propagated from UniProtKB/Swiss-Prot (Q99623.2)][N6-acetyllysine. {ECO:0000250|UniProtKB:O35129}; propagated from UniProtKB/Swiss-Prot (…
317	1	gi|24307965|ref|NP_055422.1|	gi|24307965|ref|NP_055422.1|	UBX domain-containing protein 4 [Homo sapiens]	UBXN4	1	2	2	1	0	2	4.13	0.00012374	0.708571	2	7	7	2	0	7	7.87	0.00017532	3.69714	2	8	8	2	0	8	7.87	0.00064657	508	56778	6.4	o	21	0.373	S	29	2		[1..200][4..109][319..395]	[Interaction with UBQLN1. {ECO:0000269|PubMed:19822669}][Thioredoxin_like][UBX]	[propagated from UniProtKB/Swiss-Prot (Q92575.2)][Protein Disulfide Oxidoreductases and Other Proteins with a Thioredoxin fold; cl00388][Domain present in ubiquitin-regulatory proteins; smart00166]	[order(363..366,393..394)][489][489]	[other][phosphorylation][phosphorylation]	[hydrophobic patch][][Phosphothreonine. {ECO:0000244|PubMed:17525332}; propagated from UniProtKB/Swiss-Prot (Q92575.2)]
318	1	gi|42734430|ref|NP_036364.2|	gi|42734430|ref|NP_036364.2|	polymerase I and transcript release factor [Homo sapiens]	PTRF	7	76	76	7	0	76	22.05	0.00612501	0.708502	7	265	265	7	0	265	22.05	0.00864543	0.341006	5	28	28	5	0	28	18.97	0.00294771	390	43476	5.6	o	3	0.072	Q	0	17		[48..321]	[PTRF_SDPR]	[PTRF/SDPR family; pfam15237]	[1][7][36][40][167][167][202][202][203][203][300][300][302][302][308][308][365][365][366][366][376][379][387][387][389][389]	[acetylation][phosphorylation][phosphorylation][phosphorylation][phosphorylation][phosphorylation][phosphorylation][phosphorylation][phosphorylation][phosphorylation][phosphorylation][phosphorylation][phosphorylation][phosphorylation][phosphorylation][phosphorylation][phosphorylation][phosphorylation][phosphorylation][phosphorylation][phosphorylation][phosphorylation][phosphorylation][phosphoryla…	[N-acetylmethionine. {ECO:0000269|PubMed:15242332}; propagated from UniProtKB/Swiss-Prot (Q6NZI2.1)][][Phosphoserine. {ECO:0000269|PubMed:15242332}; propagated from UniProtKB/Swiss-Prot (Q6NZI2.1)][Phosphoserine. {ECO:0000269|PubMed:15242332}; propagated from UniProtKB/Swiss-Prot (Q6NZI2.1)][][Phosphoserine. {ECO:0000269|PubMed:18669648, ECO:0000269|PubMed:20068231}; propagated from UniProtKB/Swi…
319	1	gi|7705819|ref|NP_057181.1|	gi|7705819|ref|NP_057181.1|	immediate early response 3-interacting protein 1 precursor [Homo sapiens]	IER3IP1	1	2	2	1	0	2	24.39	0.00076661	0.706262	1	7	7	1	0	7	24.39	0.00108615	1.84438	1	4	4	1	0	4	24.39	0.0020028	82	8969	8.3	o62-81i	19	0.714	S	19	18		[5..82]	[Yos1]	[Yos1-like; pfam08571]	[2..22][62..82]	[transmembrane region][transmembrane region]	[propagated from UniProtKB/Swiss-Prot (Q9Y5U9.1)][propagated from UniProtKB/Swiss-Prot (Q9Y5U9.1)]
320	1	gi|4506715|ref|NP_001022.1|	gi|4506715|ref|NP_001022.1|	40S ribosomal protein S28 [Homo sapiens]	RPS28	1	2	2	1	0	2	17.39	0.00091104	0.705655	1	7	7	1	0	7	17.39	0.00129079	0.460883	1	1	1	1	0	1	17.39	0.00059503	69	7841	10.7	i	26	0.076	Q	26	19		[10..69]	[S1_S28E]	[S1_S28E: S28E, S1-like RNA-binding domain. S1-like RNA-binding domains are found in a wide variety of RNA-associated proteins. S28E protein is a component of the 30S ribosomal subunit. S28E is highly conserved among archaea and eukaryotes. S28E may...; cd04457]	[order(15,31,43,45)]	[other]	[RNA binding site [nucleotide binding]]
321	1	gi|32189371|ref|NP_060945.2|	gi|32189371|ref|NP_060945.2|	transmembrane protein 165 precursor [Homo sapiens]	TMEM165	1	2	2	1	0	2	5.56	0.00019402	0.705455	1	7	7	1	0	7	5.56	0.00027489	3.22545	1	7	7	1	0	7	5.56	0.00088704	324	34906	7	i12-34o91-110i127-149o153-172i229-251o266-288i295-317o	34	0.825	S	34	4		[96..317][97..171][237..312]	[Gdt1][UPF0016][UPF0016]	[Putative Ca2+/H+ antiporter, TMEM165/GDT1 family [General function prediction only]; COG2119][Uncharacterized protein family UPF0016; pfam01169][Uncharacterized protein family UPF0016; pfam01169]	[90..110][127..147][152..172][229..249][268..288][300..320]	[transmembrane region][transmembrane region][transmembrane region][transmembrane region][transmembrane region][transmembrane region]	[propagated from UniProtKB/Swiss-Prot (Q9HC07.1)][propagated from UniProtKB/Swiss-Prot (Q9HC07.1)][propagated from UniProtKB/Swiss-Prot (Q9HC07.1)][propagated from UniProtKB/Swiss-Prot (Q9HC07.1)][propagated from UniProtKB/Swiss-Prot (Q9HC07.1)][propagated from UniProtKB/Swiss-Prot (Q9HC07.1)]
322	2	gi|395132436|ref|NP_001257419.1|;gi|4506607|ref|NP_000970.1|	gi|395132436|ref|NP_001257419.1|	60S ribosomal protein L18 isoform 2 [Homo sapiens]	RPL18	1	2	2	1	0	2	7.55	0.00039536	0.705357	3	7	7	3	0	7	13.84	0.00056015	2.76607	2	6	6	2	0	6	7.55	0.00154934	159	18091	11.8						19		[2..158]	[Ribosomal_L18e]	[Ribosomal protein L18e/L15; cl12022]
323	1	gi|126012562|ref|NP_002323.2|	gi|126012562|ref|NP_002323.2|	prolow-density lipoprotein receptor-related protein 1 precursor [Homo sapiens]	LRP1	24	44	44	24	0	44	9.07	0.00030435	0.700461	45	155	155	45	0	155	15.87	0.00043401	1.37327	28	66	66	28	0	66	8.6	0.00059634	4544	504610	5.4	o4421-4443i	21	0.798	S	21	12		[27..60][72..104][119..148][158..188][275..314][292..334][316..358][335..378][361..401][379..422][486..519][551..593][571..613][594..633][614..659][640..689][660..710][<700..733][711..754][807..842][854..886][895..928][936..967][978..1011][1015..1048][1062..1097][1104..1140][1145..1178][1185..1221][1309..1355][1336..1376][1356..1398][1380..1423][1399..1445][1424..1468][1446..1490][1491..1531][154…	[LDLa][LDLa][FXa_inhibition][FXa_inhibition][LY][LDL-receptor class B 1][LY][LDL-receptor class B 2][LY][LDL-receptor class B 3][FXa_inhibition][LY][LDL-receptor class B 4][LY][LDL-receptor class B 5][LY][LDL-receptor class B 6][LY][LDL-receptor class B 7][FXa_inhibition][LDLa][LDLa][LDLa][LDLa][LDLa][LDLa][LDLa][LDLa][FXa_inhibition][LDL-receptor class B 8][LY][LDL-receptor class B 9][LY][LDL-re…	[Low Density Lipoprotein Receptor Class A domain, a cysteine-rich repeat that plays a central role in mammalian cholesterol metabolism; the receptor protein binds LDL and transports it into cells by endocytosis; 7 successive cysteine-rich repeats of about...; cd00112][Low Density Lipoprotein Receptor Class A domain, a cysteine-rich repeat that plays a central role in mammalian cholesterol metabol…	[order(32,41,52..53)][order(45,48,52,58..59)][55..59][order(77,86,97..98)][order(90,93,97,103..104)][100..104][order(859,867,878..879)][order(871,874,878,884..885)][881..885][order(900,908,919..920)][order(912,915,919,925..926)][922..926][order(941,949,960..961)][order(953,956,960,966..967)][963..967][order(982,990,1001..1002)][order(994,997,1001,1007..1008)][1004..1008][order(1020,1028,1039..104…	[other][other][other][other][other][other][other][other][other][other][other][other][other][other][other][other][other][other][other][other][other][other][other][other][other][other][other][other][other][other][acetylation][other][other][other][other][other][other][other][other][other][other][other][other][other][other][other][other][other][other][other][other][other][other][other][other][other][…	[putative binding surface][calcium-binding site [ion binding]][D-X-S-D-E motif][putative binding surface][calcium-binding site [ion binding]][D-X-S-D-E motif][putative binding surface][calcium-binding site [ion binding]][D-X-S-D-E motif][putative binding surface][calcium-binding site [ion binding]][D-X-S-D-E motif][putative binding surface][calcium-binding site [ion binding]][D-X-S-D-E motif][put…
324	1	gi|56605994|ref|NP_001008389.1|	gi|56605994|ref|NP_001008389.1|	CDGSH iron-sulfur domain-containing protein 2 [Homo sapiens]	CISD2	2	5	5	2	0	5	21.48	0.00116411	0.686321	2	18	18	2	0	18	21.48	0.00169646	1.79304	2	10	10	2	0	10	21.48	0.00304129	135	15278	9.6	o38-60i	50	0.208	A	59	4		[3..66][81..119]	[MitoNEET_N][ZnF_CDGSH]	[Iron-containing outer mitochondrial membrane protein N-terminus; pfam10660][CDGSH-type zinc finger. Function unknown; smart00704]	[38..60]	[transmembrane region]	[propagated from UniProtKB/Swiss-Prot (Q8N5K1.1)]
325	1	gi|24234686|ref|NP_694881.1|	gi|24234686|ref|NP_694881.1|	heat shock cognate 71 kDa protein isoform 2 [Homo sapiens]	HSPA8	13	67	55	11	12	63.1853	35.5	0.00402835	0.685851	17	255	204	15	51	227.557	43	0.00587286	0.481185	11	35	29	9	6	33.9333	34.08	0.00282599	493	53518	5.9	o	17	0.11	Q	17	11		[6..381][7..373][186..377]	[HSPA1-2_6-8-like_NBD][MreB_Mbl][Interaction with BAG1]	[Nucleotide-binding domain of HSPA1-A, -B, -L, HSPA-2, -6, -7, -8, and similar proteins; cd10233][MreB/Mbl protein; pfam06723][propagated from UniProtKB/Swiss-Prot (P11142.1)]	[2][order(10,12..15,71,147,175,199..204,206,230..231,268,][order(23,25,27,32..34,36,50,54,57,133..134,258,262,269,][order(33,35,57,60..61,257..258,261..262,265..266,269,][108][order(152,192,213,215..217,219..220,325)][153][153][246][319][319][328][362]	[acetylation][other][other][other][acetylation][other][phosphorylation][phosphorylation][acetylation][acetylation][modified][acetylation][phosphorylation]	[N-acetylserine. {ECO:0000244|PubMed:19413330, ECO:0000269|Ref.5, ECO:0000269|Ref.6}; propagated from UniProtKB/Swiss-Prot (P11142.1)][nucleotide binding site [chemical binding]][NEF/HSP70 interaction site [polypeptide binding]][BAG/HSP70 interaction site [polypeptide binding]][N6-acetyllysine. {ECO:0000250|UniProtKB:P63017}; propagated from UniProtKB/Swiss-Prot (P11142.1)][SBD interface [polypep…
326	1	gi|25188179|ref|NP_005653.3|	gi|25188179|ref|NP_005653.3|	voltage-dependent anion-selective channel protein 3 isoform 1 [Homo sapiens]	VDAC3	9	29	29	9	0	29	38.16	0.00322084	0.682271	9	105	105	9	0	105	35.34	0.00472072	3.56471	9	116	116	9	0	116	35.34	0.0168292	283	30659	8.6	o	3	0.094	Q	0	8		[5..282]	[Porin3_VDAC]	[Voltage-dependent anion channel of the outer mitochondrial membrane; cd07306]	[2][12][15][order(16,20,46,61,84,154,282)][20][20][26..35][order(27,29,257,259,277)][39..47][54..64][67][69..76][80..89][90][95..104][109][111..120][123..130][137..145][150..158][163..175][178..185][189..198][195][202..211][218..227][231..238][241][242..251][254..263][266][273..282]	[acetylation][acetylation][acetylation][other][acetylation][modified][transmembrane region][other][transmembrane region][transmembrane region][phosphorylation][transmembrane region][transmembrane region][acetylation][transmembrane region][acetylation][transmembrane region][transmembrane region][transmembrane region][transmembrane region][transmembrane region][transmembrane region][transmembrane r…	[N-acetylcysteine. {ECO:0000244|PubMed:19413330, ECO:0000244|PubMed:25944712}; propagated from UniProtKB/Swiss-Prot (Q9Y277.1)][N6-acetyllysine. {ECO:0000250|UniProtKB:Q60931}; propagated from UniProtKB/Swiss-Prot (Q9Y277.1)][N6-acetyllysine. {ECO:0000250|UniProtKB:Q60931}; propagated from UniProtKB/Swiss-Prot (Q9Y277.1)][putative determinants of voltage gating][N6-acetyllysine, alternate. {ECO:0…
327	1	gi|170016077|ref|NP_065143.2|	gi|170016077|ref|NP_065143.2|	probable cation-transporting ATPase 13A1 [Homo sapiens]	ATP13A1	5	6	6	5	0	6	6.73	0.00015663	0.676724	8	22	22	8	0	22	11.88	0.00023249	6.02586	12	41	41	12	0	41	14.62	0.00139813	1204	132955	8.1						19	3.6.3.8	[85..1173][267..510][581..667][<831..>884]	[P-ATPase-V][E1-E2_ATPase][Hydrolase_like2][COG4087]	[P-type ATPase of unknown pump specificity (type V); TIGR01657][E1-E2 ATPase; pfam00122][Putative hydrolase of sodium-potassium ATPase alpha subunit; pfam13246][Soluble P-type ATPase [General function prediction only]]	[2][67..87][96..116][244..264][444..464][899][990..1010][1012..1032][1052..1072][1097..1117][1133..1153][1167..1187]	[acetylation][transmembrane region][transmembrane region][transmembrane region][transmembrane region][phosphorylation][transmembrane region][transmembrane region][transmembrane region][transmembrane region][transmembrane region][transmembrane region]	[N-acetylalanine. {ECO:0000244|PubMed:22223895, ECO:0000244|PubMed:22814378}; propagated from UniProtKB/Swiss-Prot (Q9HD20.2)][propagated from UniProtKB/Swiss-Prot (Q9HD20.2)][propagated from UniProtKB/Swiss-Prot (Q9HD20.2)][propagated from UniProtKB/Swiss-Prot (Q9HD20.2)][propagated from UniProtKB/Swiss-Prot (Q9HD20.2)][Phosphoserine. {ECO:0000244|PubMed:18669648, ECO:0000244|PubMed:24275569}; p…
328	2	gi|20149560|ref|NP_004595.2|;gi|443287677|ref|NP_001259025.1|	gi|20149560|ref|NP_004595.2|	syntaxin-4 isoform 3 [Homo sapiens]	STX4	2	3	3	2	0	3	10.1	0.00031748	0.673036	4	11	11	4	0	11	25.59	0.00047124	1.46709	3	5	5	3	0	5	14.81	0.0006912	297	34180	6.3	i274-296o	35	0.017	Q	0	16		[39..189][154..297][199..261]	[SynN][Interaction with CENPF (By similarity)][SNARE_syntaxin4]	[Syntaxin N-terminus domain; syntaxins are nervous system-specific proteins implicated in the docking of synaptic vesicles with the presynaptic plasma membrane; they are a family of receptors for intracellular transport vesicles; each target membrane may...; cd00179][propagated from UniProtKB/Swiss-Prot (Q12846.2)][SNARE motif of syntaxin 4; cd15883]	[14][15][order(42,49,121..122,125..126,129,132..133,139,142,174)][order(69,80,83..84,91,95,98,105,127,132,135,141,148..149,][117][order(166..176,185..189)][order(204,206..207,209..214,216..218,220..221,223..225,][234][276..296]	[phosphorylation][phosphorylation][other][other][phosphorylation][other][other][other][transmembrane region]	[Phosphoserine; propagated from UniProtKB/Swiss-Prot (Q12846.2)][Phosphoserine; propagated from UniProtKB/Swiss-Prot (Q12846.2)][nSec1 interaction sites][interdomain interaction site][Phosphoserine; propagated from UniProtKB/Swiss-Prot (Q12846.2)][linker region][heterotetramer interface [polypeptide binding]][zero layer][propagated from UniProtKB/Swiss-Prot (Q12846.2)]
329	1	gi|262118282|ref|NP_115618.3|	gi|262118282|ref|NP_115618.3|	plexin-A1 precursor [Homo sapiens]	PLXNA1	2	4	4	2	0	4	1.48	6.631e-05	0.653465	7	15	15	7	0	15	5.33	0.00010066	1.28713	2	6	6	2	0	6	1.05	0.00012993	1896	211066	6.9						3		[38..513][514..553][660..707][808..862][864..960][961..1046][1048..1148][1150..1234][1318..1890]	[Sema_plexin_A1][PSI][PSI][PSI][IPT_plexin_repeat1][IPT_plexin_repeat2][IPT_plexin_repeat3][IPT_PCSR][RasGAP_plexin_A]	[The Sema domain, a protein interacting module, of Plexin A1; cd11271][Plexin repeat; pfam01437][Plexin repeat; pfam01437][Plexin repeat; pfam01437][First repeat of the IPT domain of Plexins and Cell Surface Receptors (PCSR) . Plexins are involved in the regulation of cell proliferation and of cellular adhesion and repulsion receptors. In general, there are three copies of the IPT domain present.…	[order(94,96..97,156,195..197,223..225,232..234,388,391,][1245..1265][order(1386,1427,1431..1435,1442,1739,1747..1748,]	[other][transmembrane region][other]	[putative Semaphorin binding site [polypeptide binding]][propagated from UniProtKB/Swiss-Prot (Q9UIW2.3)][putative Rap interface [polypeptide binding]]
330	1	gi|5902102|ref|NP_008869.1|	gi|5902102|ref|NP_008869.1|	small nuclear ribonucleoprotein Sm D1 [Homo sapiens]	SNRPD1	1	6	6	1	0	6	16.81	0.00158475	0.644571	2	23	23	2	0	23	27.73	0.00245916	5.19154	2	37	37	2	0	37	27.73	0.0127657	119	13282	11.6	o	17	0.31	Q	17	18		[1..80][2..93]	[Sufficient for interaction with CLNS1A][Sm_D1]	[propagated from UniProtKB/Swiss-Prot (P62314.1)][Sm protein D1; cd01724]	[order(2,4,35..37,61..63)][order(3,6..7,18..21,30..31,33..36,39,55,57..71,74,79,][order(15..21,23..35,37..41)][57..68][98][100][102][104][106][108][110][112][114]	[other][other][other][other][methylation][methylation][methylation][methylation][methylation][methylation][methylation][methylation][methylation]	[RNA binding site [nucleotide binding]][heptamer interface [polypeptide binding]][Sm1 motif][Sm2 motif][][][][][][][][][]
331	1	gi|33350932|ref|NP_001367.2|	gi|33350932|ref|NP_001367.2|	cytoplasmic dynein 1 heavy chain 1 [Homo sapiens]	DYNC1H1	6	8	8	6	0	8	2.07	5.412e-05	0.635294	15	31	31	15	0	31	5.08	8.49e-05	0.105882	1	1	1	1	0	1	0.5	8.84e-06	4646	532412	6.4	o	32	0.031	Q	26	14		[53..1867][238..834][448..703][651..802][1046..4329][1320..1725][1868..2105][1868..2099][2180..2452][2219..2359][2556..2805][2570..2733][2899..3168][2922..>3012][3189..3500][3201..3532][3553..3782][3562..3780][3915..4645][4005..4221]	[Stem. {ECO:0000250}][DHC_N1][Interaction with DYNC1I2. {ECO:0000250}][Interaction with DYNC1LI2. {ECO:0000250}][DYN1][DHC_N2][P-loop_NTPase][AAA 1. {ECO:0000250}][AAA 2. {ECO:0000250}][P-loop_NTPase][AAA 3. {ECO:0000250}][AAA][AAA 4. {ECO:0000250}][AAA][Stalk. {ECO:0000250}][MT][AAA 5. {ECO:0000250}][AAA_9][Dynein_heavy][AAA 6. {ECO:0000250}]	[propagated from UniProtKB/Swiss-Prot (Q14204.5)][Dynein heavy chain, N-terminal region 1; pfam08385][propagated from UniProtKB/Swiss-Prot (Q14204.5)][propagated from UniProtKB/Swiss-Prot (Q14204.5)][Dynein, heavy chain [Cytoskeleton]; COG5245][Dynein heavy chain, N-terminal region 2; pfam08393][P-loop containing Nucleoside Triphosphate Hydrolases; cl21455][propagated from UniProtKB/Swiss-Prot (Q…	[2][1125][1230][2410][2595..2602][order(2596..2603,2664,2713)][2660..2665][2726][2937..2944][order(2938..2945,2995)][2991..2996][3480][4283][4368][4368]	[acetylation][acetylation][phosphorylation][phosphorylation][other][other][other][other][other][other][other][acetylation][acetylation][phosphorylation][phosphorylation]	[N-acetylserine. {ECO:0000244|PubMed:22223895}; propagated from UniProtKB/Swiss-Prot (Q14204.5)][N6-acetyllysine. {ECO:0000244|PubMed:19608861}; propagated from UniProtKB/Swiss-Prot (Q14204.5)][Phosphoserine. {ECO:0000250|UniProtKB:Q9JHU4}; propagated from UniProtKB/Swiss-Prot (Q14204.5)][][Walker A motif][ATP binding site [chemical binding]][Walker B motif][arginine finger][Walker A motif][ATP b…
332	4	gi|259013216|ref|NP_001158355.1|;gi|543583683|ref|NP_001269527.1|;gi|543583729|ref|NP_001269526.1|;gi|55770846|ref|NP_004380.2|	gi|259013216|ref|NP_001158355.1|	catenin alpha-2 isoform 2 [Homo sapiens]	CTNNA2	4	11	11	4	0	11	6.86	0.00040202	0.632075	5	43	43	5	0	43	9.77	0.00063617	0.0754717	1	1	1	1	0	1	2.09	4.774e-05	860	95558	5.9						2		[18..821]	[Vinculin]	[Vinculin family; pfam01044]	[632][640][651]	[phosphorylation][phosphorylation][phosphorylation]	[Phosphothreonine. {ECO:0000250|UniProtKB:Q61301}; propagated from UniProtKB/Swiss-Prot (P26232.5)][Phosphoserine. {ECO:0000244|PubMed:21406692}; propagated from UniProtKB/Swiss-Prot (P26232.5)][Phosphoserine. {ECO:0000250|UniProtKB:Q61301}; propagated from UniProtKB/Swiss-Prot (P26232.5)]
333	1	gi|189458819|ref|NP_001121620.1|	gi|189458819|ref|NP_001121620.1|	transferrin receptor protein 1 [Homo sapiens]	TFRC	4	11	11	4	0	11	6.18	0.00045492	0.631944	4	43	43	4	0	43	5.66	0.00071988	0.75	3	10	10	3	0	10	4.47	0.00054023	760	84871	6.6						3		[1..67][20..23][58..61][201..377][385..610][569..760][636..752][646..648]	[Mediates interaction with SH3BP4][Endocytosis signal][Stop-transfer sequence][PA_TfR][M28_TfR][Ligand-binding][TFR_dimer][Cell attachment site, required for binding to transferrin]	[propagated from UniProtKB/Swiss-Prot (P02786.2)][propagated from UniProtKB/Swiss-Prot (P02786.2)][propagated from UniProtKB/Swiss-Prot (P02786.2)][PA_TfR: Protease-associated domain containing proteins like transferrin receptor (TfR). This group contains various PA domain-containing proteins similar to human TfR1 and TfR2. TfR1 and TfR2 are type II membrane proteins, belonging to the peptidase M…	[19][20][21][24][68..88][100..101][order(287,295..298,300,304..307,310,312..314)][order(305,311)][order(310,313)][order(314,316,320..321)][order(392,394,397,399..400,402,447,449,466,469..477)]	[phosphorylation][phosphorylation][phosphorylation][phosphorylation][transmembrane region][cleavage][other][other][other][other][other]	[Phosphoserine. {ECO:0000250|UniProtKB:Q62351}; propagated from UniProtKB/Swiss-Prot (P02786.2)][Phosphotyrosine. {ECO:0000244|PubMed:20068231}; propagated from UniProtKB/Swiss-Prot (P02786.2)][Phosphothreonine. {ECO:0000244|PubMed:18669648}; propagated from UniProtKB/Swiss-Prot (P02786.2)][Phosphoserine. {ECO:0000269|PubMed:9782058}; propagated from UniProtKB/Swiss-Prot (P02786.2)][propagated fr…
334	1	gi|294459921|ref|NP_001170884.1|	gi|294459921|ref|NP_001170884.1|	ubiquitin-40S ribosomal protein S27a precursor [Homo sapiens]	RPS27A	3	17	17	3	0	17	24.36	0.00342517	0.626715	4	67	67	4	0	67	30.13	0.00546456	0.529735	3	11	11	3	0	11	21.79	0.00289507	156	17965	9.6	o	16	0.099	Q	16	2		[1..76][1..72][102..147]	[Ubiquitin][UBQ][Ribosomal_S27]	[Ubiquitin; cd01803][Ubiquitin homologues; smart00213][Ribosomal protein S27a; pfam01599]	[order(6..10,40,42,44,47..49,68,70..76)][order(6,8..10,39,41..42,66,68,70..76)][order(6,8,44,46..49,68,70,72,76)][68][104][113]	[other][other][other][other][acetylation][acetylation]	[Ubq - E2 interaction site][Ubq - UCH interaction site][Ubq - CUE interaction site][Essential for function; propagated from UniProtKB/Swiss-Prot (P62979.2)][N6-acetyllysine; propagated from UniProtKB/Swiss-Prot (P62979.2)][N6-acetyllysine; propagated from UniProtKB/Swiss-Prot (P62979.2)]
335	1	gi|14149738|ref|NP_065777.1|	gi|14149738|ref|NP_065777.1|	neurolysin, mitochondrial [Homo sapiens]	NLN	1	1	1	1	0	1	1.99	4.465e-05	0.625	2	4	4	2	0	4	3.41	7.229e-05	0.805556	1	1	1	1	0	1	1.99	5.832e-05	704	80652	6.6	o	28	0.436	Q	18	5	3.4.24.16	[54..701][58..699]	[Dcp][M3A_TOP]	[Zn-dependent oligopeptidase [Posttranslational modification, protein turnover, chaperones]; COG0339][Peptidase M3 Thimet oligopeptidase (TOP) also includes neurolysin; cd06455]	[160][order(497..498,501,526,624,633,636)][order(497,501,526)][664]	[modified][active][other][acetylation]	[proteolytic cleavage site][][Zn binding site [ion binding]][N6-acetyllysine. {ECO:0000244|PubMed:19608861}; propagated from UniProtKB/Swiss-Prot (Q9BYT8.1)]
336	1	gi|14589929|ref|NP_061908.1|	gi|14589929|ref|NP_061908.1|	protocadherin-18 precursor [Homo sapiens]	PCDH18	1	1	1	1	0	1	1.41	2.769e-05	0.622222	2	4	4	2	0	4	2.73	4.484e-05	3.22222	2	4	4	2	0	4	2.29	0.0001447	1135	126149	5.2	o698-720i	28	0.743	S	28	4		[32..133][144..242][250..350][368..461][470..572][587..672][893..1135]	[Cadherin_repeat][Cadherin_repeat][Cadherin_repeat][Cadherin_repeat][Cadherin_repeat][Cadherin_repeat][Interaction with DAB1. {ECO:0000250}]	[Cadherin tandem repeat domain; cd11304][Cadherin tandem repeat domain; cd11304][Cadherin tandem repeat domain; cd11304][Cadherin tandem repeat domain; cd11304][Cadherin tandem repeat domain; cd11304][Cadherin tandem repeat domain; cd11304][propagated from UniProtKB/Swiss-Prot (Q9HCL0.3)]	[order(36..37,93,95,129,131..132)][order(148..149,205,207,238,240..241)][order(257..258,313,315,346,348..349)][order(371..372,424,426,457,459..460)][order(476..477,534,536,568,570..571)][700..720]	[other][other][other][other][other][transmembrane region]	[Ca2+ binding site [ion binding]][Ca2+ binding site [ion binding]][Ca2+ binding site [ion binding]][Ca2+ binding site [ion binding]][Ca2+ binding site [ion binding]][propagated from UniProtKB/Swiss-Prot (Q9HCL0.3)]
337	1	gi|21614525|ref|NP_001439.2|	gi|21614525|ref|NP_001439.2|	glypican-4 precursor [Homo sapiens]	GPC4	1	1	1	1	0	1	3.24	5.653e-05	0.619565	1	4	4	1	0	4	3.06	9.154e-05	2.41304	2	3	3	2	0	3	6.29	0.00022153	556	62412	6.7	o	23	0.751	S	23	X		[26..555]	[Glypican]	[Glypican; pfam01153]	[357]	[phosphorylation]	[Phosphoserine; propagated from UniProtKB/Swiss-Prot (O75487.4)]
338	1	gi|4502227|ref|NP_001168.1|	gi|4502227|ref|NP_001168.1|	ADP-ribosylation factor-like protein 1 [Homo sapiens]	ARL1	1	1	1	1	0	1	8.84	0.00017365	0.619217	1	4	4	1	0	4	8.84	0.00028118	1.61566	1	2	2	1	0	2	8.84	0.00045367	181	20418	5.7	o	24	0.317	Q	15	12		[16..175][19..176]	[SAR][Arl1]	[Sar1p-like members of the Ras-family of small GTPases; smart00178][ADP ribosylation factor 1 (Arf1); cd04151]	[24..31][order(26..32,45,48,70,126..127,129,159..161)][order(26..27,31,35,47..54,76,81)][36..51][order(48..52,57,67,71,77,79..81)][48][order(50..51,64,80..81,83,115)][order(51..58,61..66)][order(67..75,77..80)][67..70][126..129][159..161]	[other][other][other][other][other][other][other][other][other][other][other][other]	[G1 box][GTP/Mg2+ binding site [chemical binding]][putative GAP interaction site [polypeptide binding]][Switch I region][putative GEF interaction site [polypeptide binding]][G2 box][effector interaction site][interswitch region][Switch II region][G3 box][G4 box][G5 box]
339	1	gi|190341022|ref|NP_001121781.1|	gi|190341022|ref|NP_001121781.1|	tetraspanin-14 isoform 2 [Homo sapiens]	TSPAN14	1	1	1	1	0	1	7.48	0.00021382	0.618497	1	4	4	1	0	4	10.2	0.00034622	0.806358	1	1	1	1	0	1	7.48	0.0002793	147	16901	7.8						10		[<23..110][<27..138]	[tetraspanin_LEL][Tetraspannin]	[Tetraspanin, extracellular domain or large extracellular loop (LEL). Tetraspanins are trans-membrane proteins with 4 trans-membrane segments. Both the N- and C-termini lie on the intracellular side of the membrane. This alignment model spans the...; cl02781][Tetraspanin family; pfam00335]
340	1	gi|4506681|ref|NP_001006.1|	gi|4506681|ref|NP_001006.1|	40S ribosomal protein S11 [Homo sapiens]	RPS11	2	2	2	2	0	2	18.35	0.00039786	0.618012	5	8	8	5	0	8	35.44	0.00064423	0.807453	2	2	2	2	0	2	11.39	0.00051971	158	18431	10.3	o	27	0.02	Q	0	19		[1..158]	[PTZ00241]	[40S ribosomal protein S11; Provisional]	[2][38][45]	[acetylation][acetylation][acetylation]	[N-acetylalanine; propagated from UniProtKB/Swiss-Prot (P62280.3)][N6-acetyllysine; propagated from UniProtKB/Swiss-Prot (P62280.3)][N6-acetyllysine; propagated from UniProtKB/Swiss-Prot (P62280.3)]
341	1	gi|42794754|ref|NP_976251.1|	gi|42794754|ref|NP_976251.1|	long-chain-fatty-acid--CoA ligase 3 [Homo sapiens]	ACSL3	2	3	3	2	0	3	5.42	0.00013096	0.617925	3	12	12	3	0	12	7.5	0.00021206	0.537736	2	2	2	2	0	2	5.42	0.00011405	720	80420	8.4	i21-43o	32	0.394	A	38	2	6.2.1.3	[30..717][130..717]	[PLN02387][LC-FACS_euk]	[long-chain-fatty-acid-CoA ligase family protein][Eukaryotic long-chain fatty acid CoA synthetase (LC-FACS); cd05927]	[21..41][order(284,287..292,294..295)][order(287,412..413,473..478,564,576,579,591,697)][order(287,328..329,383,385..386,389,412..413,473..478,564,][order(328,385..386,389,412,588..590,672,674)][593][683]	[transmembrane region][other][other][active][other][phosphorylation][phosphorylation]	[propagated from UniProtKB/Swiss-Prot (O95573.3)][acyl-activating enzyme (AAE) consensus motif][putative AMP binding site [chemical binding]][putative active site [active]][putative CoA binding site [chemical binding]][][Phosphoserine; propagated from UniProtKB/Swiss-Prot (O95573.3)]
342	1	gi|21361657|ref|NP_005304.3|	gi|21361657|ref|NP_005304.3|	protein disulfide-isomerase A3 precursor [Homo sapiens]	PDIA3	7	15	15	7	0	15	13.07	0.00093359	0.617725	8	60	60	8	0	60	17.43	0.0015117	0.161376	2	3	3	2	0	3	4.16	0.00024391	505	56782	6.4	o	25	0.866	S	25	15	5.3.4.1	[25..487][26..131][135..240][244..357][377..480][502..505]	[ER_PDI_fam][Thioredoxin][PDI_b_ERp57][PDI_b'_ERp72_ERp57][PDI_a_PDI_a'_C][ER retention motif]	[protein disulfide isomerase, eukaryotic; TIGR01130][Thioredoxin; pfam00085][PDIb family, ERp57 subfamily, first redox inactive TRX-like domain b; ERp57 (or ERp60) exhibits both disulfide oxidase and reductase functions like PDI, by catalyzing the formation of disulfide bonds of newly synthesized polypeptides in the ER and acting...; cd03069][PDIb' family, ERp72 and ERp57 subfamily, second redox …	[25][58][59][119][129][152][218][252][319][362][order(406,409,471)][407][408][471][494]	[acetylation][other][other][other][modified][acetylation][modified][acetylation][phosphorylation][acetylation][active][other][other][other][acetylation]	[][Contributes to redox potential value. {ECO:0000250}; propagated from UniProtKB/Swiss-Prot (P30101.4)][Contributes to redox potential value. {ECO:0000250}; propagated from UniProtKB/Swiss-Prot (P30101.4)][Lowers pKa of C-terminal Cys of first active site. {ECO:0000250}; propagated from UniProtKB/Swiss-Prot (P30101.4)][N6-succinyllysine. {ECO:0000250|UniProtKB:P27773}; propagated from UniProtKB/…
343	1	gi|11968182|ref|NP_072045.1|	gi|11968182|ref|NP_072045.1|	40S ribosomal protein S18 [Homo sapiens]	RPS18	3	6	6	3	0	6	20.39	0.0012407	0.61772	6	24	24	6	0	24	32.89	0.00200897	1.34445	5	10	10	5	0	10	30.26	0.00270114	152	17719	11	o	42	0.078	Q	42	6		[1..152]	[PTZ00134]	[40S ribosomal protein S18; Provisional]	[2][94][106]	[acetylation][acetylation][acetylation]	[N-acetylserine; propagated from UniProtKB/Swiss-Prot (P62269.3)][N6-acetyllysine; propagated from UniProtKB/Swiss-Prot (P62269.3)][N6-acetyllysine; propagated from UniProtKB/Swiss-Prot (P62269.3)]
344	1	gi|4506619|ref|NP_000977.1|	gi|4506619|ref|NP_000977.1|	60S ribosomal protein L24 [Homo sapiens]	RPL24	1	1	1	1	0	1	5.73	0.0002002	0.617284	3	4	4	3	0	4	18.47	0.00032416	3.2284	1	4	4	1	0	4	8.28	0.00104605	157	17779	11.3	o	19	0.049	Q	19	3		[1..54]	[Ribosomal_L24e_L24]	[Ribosomal protein L24e/L24 is a ribosomal protein found in eukaryotes (L24) and in archaea (L24e, distinct from archaeal L24). L24e/L24 is located on the surface of the large subunit, adjacent to proteins L14 and L3, and near the translation factor...; cd00472]	[order(6,9,32,36)][14..16][order(16,18..20,22,24..25)][order(17..18,34..35,37..38,42,44,50..51)][27][77][83][83][86][93]	[other][other][other][other][acetylation][acetylation][phosphorylation][phosphorylation][phosphorylation][acetylation]	[zinc binding site [ion binding]][L3 interface [polypeptide binding]][L14 interface [polypeptide binding]][23S rRNA interface [nucleotide binding]][N6-acetyllysine; propagated from UniProtKB/Swiss-Prot (P83731.1)][N6-acetyllysine; propagated from UniProtKB/Swiss-Prot (P83731.1)][][Phosphothreonine; propagated from UniProtKB/Swiss-Prot (P83731.1)][Phosphoserine; propagated from UniProtKB/Swiss-Pro…
345	1	gi|123701900|ref|NP_006589.2|	gi|123701900|ref|NP_006589.2|	solute carrier family 12 member 7 [Homo sapiens]	SLC12A7	1	2	2	1	0	2	1.2	5.804e-05	0.617021	4	8	8	4	0	8	6.37	9.399e-05	3.62766	4	9	9	4	0	9	6.37	0.0003412	1083	119106	6.7	i122-144o154-176i197-219o251-270i277-296o412-434i455-477o492-514i555-572o576-598i618-640o	2	0.098	Q	15	5		[45..1083][<411..623]	[2a30][SLC5-6-like_sbd]	[K-Cl cotransporter; TIGR00930][Solute carrier families 5 and 6-like; solute binding domain; cl00456]	[30][50][62][119..139][141..161][215..235][253..273][276..296][416..436][457..477][494..514][554..574][578..598][625..645][845..865][973][980]	[phosphorylation][phosphorylation][phosphorylation][transmembrane region][transmembrane region][transmembrane region][transmembrane region][transmembrane region][transmembrane region][transmembrane region][transmembrane region][transmembrane region][transmembrane region][transmembrane region][transmembrane region][phosphorylation][phosphorylation]	[Phosphothreonine. {ECO:0000244|PubMed:24275569}; propagated from UniProtKB/Swiss-Prot (Q9Y666.3)][Phosphoserine. {ECO:0000244|PubMed:19690332}; propagated from UniProtKB/Swiss-Prot (Q9Y666.3)][Phosphoserine. {ECO:0000244|PubMed:19690332}; propagated from UniProtKB/Swiss-Prot (Q9Y666.3)][propagated from UniProtKB/Swiss-Prot (Q9Y666.3)][propagated from UniProtKB/Swiss-Prot (Q9Y666.3)][propagated f…
346	1	gi|7657138|ref|NP_055313.1|	gi|7657138|ref|NP_055313.1|	Golgi integral membrane protein 4 [Homo sapiens]	GOLIM4	1	1	1	1	0	1	1.72	4.516e-05	0.616438	2	4	4	2	0	4	3.88	7.312e-05	9.69863	4	12	12	4	0	12	7.18	0.00070789	696	81880	4.8	i13-35o	30	0.701	A	30	3		[38..107][67..>213][80..175][176..248]	[Golgi targeting][DUF334][Endosome targeting][Golgi targeting]	[propagated from UniProtKB/Swiss-Prot (O00461.1)][Domain of unknown function (DUF334); pfam03904][propagated from UniProtKB/Swiss-Prot (O00461.1)][propagated from UniProtKB/Swiss-Prot (O00461.1)]	[13..33][364][394][396][538][613][626][640][641][673]	[transmembrane region][phosphorylation][phosphorylation][phosphorylation][phosphorylation][phosphorylation][phosphorylation][phosphorylation][phosphorylation][phosphorylation]	[propagated from UniProtKB/Swiss-Prot (O00461.1)][Phosphoserine. {ECO:0000269|PubMed:24275569}; propagated from UniProtKB/Swiss-Prot (O00461.1)][][][Phosphoserine. {ECO:0000269|PubMed:24275569}; propagated from UniProtKB/Swiss-Prot (O00461.1)][Phosphotyrosine. {ECO:0000269|PubMed:24275569}; propagated from UniProtKB/Swiss-Prot (O00461.1)][Phosphothreonine. {ECO:0000269|PubMed:24275569}; propagate…
347	3	gi|557878736|ref|NP_001273637.1|;gi|557878738|ref|NP_001273639.1|;gi|557878740|ref|NP_001273640.1|	gi|557878736|ref|NP_001273637.1|	long-chain-fatty-acid--CoA ligase 1 isoform a [Homo sapiens]	ACSL1	1	1	1	1	0	1	1.29	4.503e-05	0.616438	2	4	4	2	0	4	3.3	7.291e-05	2.41096	1	3	3	1	0	3	1.29	0.00017646	698	77943	7.1	i21-43o	38	0.169	A	49	4	6.2.1.3	[86..696][116..693]	[PLN02736][LC-FACS_euk]	[long-chain acyl-CoA synthetase][Eukaryotic long-chain fatty acid CoA synthetase (LC-FACS); cd05927]	[1][25..45][order(273,276..281,283..284)][order(276,393..394,456..461,540,552,555,567,673)][order(276,320..321,366,368..369,372,393..394,456..461,540,][order(320,368..369,372,393,564..566,648,650)]	[acetylation][transmembrane region][other][other][active][other]	[N-acetylmethionine; propagated from UniProtKB/Swiss-Prot (P33121.1)][propagated from UniProtKB/Swiss-Prot (P33121.1)][acyl-activating enzyme (AAE) consensus motif][putative AMP binding site [chemical binding]][putative active site [active]][putative CoA binding site [chemical binding]]
348	1	gi|115511049|ref|NP_002058.2|	gi|115511049|ref|NP_002058.2|	guanine nucleotide-binding protein subunit alpha-11 [Homo sapiens]	GNA11	4	14	7	1	7	9.45	15.88	0.00082736	0.615327	6	46	27	2	19	37.9149	20.06	0.00134376	0.170387	1	2	2	1	0	2	5.29	0.00022873	359	42123	5.7	o	19	0.039	Q	19	19		[19..357][40..353]	[G_alpha][G-alpha]	[G protein alpha subunit; smart00275][Alpha subunit of G proteins (guanine nucleotide binding); cd00066]	[9][10][order(46,51..53,186,205,208,274..275,277,330..331)][46..53][order(47..49,77,81,85,88,91..92,110,113,154,183,208,216,][181..189][183][186][order(187,189,191,202,204,208..210,212,215..216,218..221)][order(189,214,217..218,221)][205..208][206..222][209][274..277][order(322..333,335..338)][330..332]	[modified][modified][other][other][other][other][modified][other][other][other][other][other][amidation][other][other][other]	[palmitoylation site][palmitoylation site][GTP/Mg2+ binding site [chemical binding]][G1 box][GoLoco binding site][Switch I region][ADP-ribosylarginine, by cholera toxin. {ECO:0000250}; propagated from UniProtKB/Swiss-Prot (P29992.2)][G2 box][beta - gamma complex interaction site [polypeptide binding]][adenylyl cyclase interaction site [polypeptide binding]][G3 box][Switch II region][Deamidated gl…
349	1	gi|71051600|ref|NP_057098.2|	gi|71051600|ref|NP_057098.2|	alpha/beta hydrolase domain-containing protein 17B isoform 1 precursor [Homo sapiens]	ABHD17B	1	1	1	1	0	1	8.87	0.00010727	0.614943	2	4	4	2	0	4	14.68	0.0001737	1.6092	1	2	2	1	0	2	4.1	0.00028026	293	32823	6.8	o	21	0.198	S	21	9		[93..265][140..264]	[Abhydrolase_5][Esterase_lipase]	[Alpha/beta hydrolase family; pfam12695][Esterases and lipases (includes fungal lipases, cholinesterases, etc.) These enzymes act on carboxylic esters (EC: 3.1.1.-). The catalytic apparatus involves three residues (catalytic triad): a serine, a glutamate or aspartate and a histidine.These...; cl21494]	[282]	[phosphorylation]	[Phosphoserine. {ECO:0000250|UniProtKB:Q7M759}; propagated from UniProtKB/Swiss-Prot (Q5VST6.1)]
350	1	gi|21536378|ref|NP_003733.2|	gi|21536378|ref|NP_003733.2|	bile salt export pump [Homo sapiens]	ABCB11	1	3	3	1	0	3	1.29	7.138e-05	0.612069	1	12	12	1	0	12	1.29	0.00011558	1.15517	2	6	4	1	2	4.30769	1.89	0.00013389	1321	146407	6.6	i61-83o144-166i219-236o241-263i320-342o754-776i797-819o891-913i978-1000o1015-1037i	70	0.03	Q	0	2		[21..1314][133..373][420..657][651..672][762..1031][1078..1317]	[PTZ00265][ABC_membrane][ABC_MTABC3_MDL1_MDL2][Interaction with HAX1. {ECO:0000250}][ABC_membrane][ABC_MTABC3_MDL1_MDL2]	[multidrug resistance protein (mdr1); Provisional][ABC transporter transmembrane region; pfam00664][ATP-binding cassette domain of a mitochondrial protein MTABC3 and related proteins; cd03249][propagated from UniProtKB/Swiss-Prot (O95342.2)][ABC transporter transmembrane region; pfam00664][ATP-binding cassette domain of a mitochondrial protein MTABC3 and related proteins; cd03249]	[63..83][148..168][216..236][241..261][320..340][354..374][455..462][order(458..459,461..463,503,583..584,615)][500..503][559..568][579..584][586][587..590][587][611..617][690][701][704][756..776][795..815][870..890][891..911][980..1000][1012..1032][1113..1120][order(1116..1117,1119..1121,1161,1243..1244,1275)][1158..1161][1214][1219..1228][1239..1244][1247..1250][1271..1277][1321]	[transmembrane region][transmembrane region][transmembrane region][transmembrane region][transmembrane region][transmembrane region][other][other][other][other][other][phosphorylation][other][phosphorylation][other][phosphorylation][phosphorylation][phosphorylation][transmembrane region][transmembrane region][transmembrane region][transmembrane region][transmembrane region][transmembrane region][…	[propagated from UniProtKB/Swiss-Prot (O95342.2)][propagated from UniProtKB/Swiss-Prot (O95342.2)][propagated from UniProtKB/Swiss-Prot (O95342.2)][propagated from UniProtKB/Swiss-Prot (O95342.2)][propagated from UniProtKB/Swiss-Prot (O95342.2)][propagated from UniProtKB/Swiss-Prot (O95342.2)][Walker A/P-loop][ATP binding site [chemical binding]][Q-loop/lid][ABC transporter signature motif][Walke…
351	1	gi|4506741|ref|NP_001002.1|	gi|4506741|ref|NP_001002.1|	40S ribosomal protein S7 [Homo sapiens]	RPS7	3	9	9	3	0	9	26.8	0.00145814	0.600742	6	37	37	6	0	37	48.45	0.00242664	0.0873506	1	1	1	1	0	1	11.34	0.00021164	194	22127	10.1	o	39	0.023	Q	0	2	3.6.5.3	[7..191]	[Ribosomal_S7e]	[Ribosomal protein S7e; pfam01251]	[74][137]	[acetylation][phosphorylation]	[N6-acetyllysine; propagated from UniProtKB/Swiss-Prot (P62081.1)][]
352	1	gi|19923483|ref|NP_057406.2|	gi|19923483|ref|NP_057406.2|	ras-related protein Rab-14 [Homo sapiens]	RAB14	7	16	16	7	0	16	46.98	0.00233905	0.589912	10	67	67	10	0	67	61.4	0.00396499	2.11904	11	44	44	11	0	44	54.42	0.00840244	215	23897	6.2	o	26	0.103	Q	24	9		[7..213][10..175][40..48]	[PLN03108][Rab14][Effector region. {ECO:0000250}]	[Rab family protein; Provisional][Rab GTPase family 14 (Rab14); cd04122][propagated from UniProtKB/Swiss-Prot (P61106.4)]	[2][12..13][18..25][order(21..26,36,66,124..125,127..128,155..156)][order(26..36,41..42)][order(36,41..49)][order(41,45..52,59,61)][43][order(44,46..48,63,65,72..73,76,80,82..85)][order(44..45,47,65..66,73,75,77..79)][44..48][61..65][66..69][order(69,71..81)][72..77][80..84][89..94][112..121][124..127][154..156][170..175][215]	[acetylation][other][other][other][other][other][other][other][other][other][other][other][other][other][other][other][other][other][other][other][other][methylation]	[N-acetylalanine. {ECO:0000269|PubMed:19413330, ECO:0000269|PubMed:22223895, ECO:0000269|Ref.12}; propagated from UniProtKB/Swiss-Prot (P61106.4)][Rab subfamily motif 1 (RabSF1)][G1 box][GTP/Mg2+ binding site [chemical binding]][Rab subfamily motif 2 (RabSF2)][Switch I region][putative GEF interaction site [polypeptide binding]][G2 box][putative effector interaction site][putative GDI interaction…
353	1	gi|57013276|ref|NP_006073.2|	gi|57013276|ref|NP_006073.2|	tubulin alpha-1B chain [Homo sapiens]	TUBA1B	15	103	0	0	103	6	48.56	0.00041815	0.588732	13	154	0	0	154	25.1667	43.24	0.00070999	0.111268	3	3	0	0	3	0.866667	11.75	7.89e-05	451	50152	5.1	o	20	0.128	Q	20	12		[1..440][2..435]	[PTZ00335][alpha_tubulin]	[tubulin alpha chain; Provisional][The alpha-tubulin family; cd02186]	[order(2,199,253..254,256..258,260..261,326,352)][order(11..12,15,71,101,143..146,171,206,224,228)][48][order(72..73,100..102,105,181,183,224)][83][232][282][339][394][432][439][451]	[other][other][phosphorylation][other][modified][phosphorylation][modified][methylation][methylation][phosphorylation][phosphorylation][other]	[beta/alpha domain interface [polypeptide binding]][nucleotide binding site [chemical binding]][Phosphoserine. {ECO:0000269|Ref.6}; propagated from UniProtKB/Swiss-Prot (P68363.1)][alpha/beta domain interface [polypeptide binding]][Nitrated tyrosine. {ECO:0000250|UniProtKB:P68368}; propagated from UniProtKB/Swiss-Prot (P68363.1)][Phosphoserine. {ECO:0000269|Ref.6}; propagated from UniProtKB/Swiss…
354	1	gi|4826834|ref|NP_004986.1|	gi|4826834|ref|NP_004986.1|	matrix metalloproteinase-14 preproprotein [Homo sapiens]	MMP14	3	3	3	3	0	3	7.56	0.00016202	0.570423	4	13	13	4	0	13	9.97	0.0002842	0.746479	2	3	3	2	0	3	5.5	0.00021164	582	65894	7.8	o540-562i	24	0.707	S	29	14	3.4.24.80	[36..88][118..284][118..284][316..508][<560..582]	[PG_binding_1][Peptidase_M10][ZnMc_MMP][HX][DUF3377]	[Putative peptidoglycan binding domain; pfam01471][Matrixin; pfam00413][Zinc-dependent metalloprotease, matrix metalloproteinase (MMP) sub-family. MMPs are responsible for a great deal of pericellular proteolysis of extracellular matrix and cell surface molecules, playing crucial roles in morphogenesis, cell fate...; cd04278][Hemopexin-like repeats.; Hemopexin is a heme-binding protein that trans…	[order(178,190,197..203,212,239..240,249,259..261)][order(239..240,243,249)][order(324,326,369,371,416,418,464,466)]	[other][active][metal-binding]	[TIMP-binding surface][][Metal binding sites [ion binding]]
355	1	gi|511630715|ref|NP_001265432.1|	gi|511630715|ref|NP_001265432.1|	dolichyl-diphosphooligosaccharide--protein glycosyltransferase subunit STT3A isoform a [Homo sapiens]	STT3A	2	3	3	2	0	3	3.55	0.00013375	0.570213	4	13	13	4	0	13	6.24	0.00023462	4.45957	8	18	18	8	0	18	11.91	0.00104827	705	80530	8.1	i20-39o83-105i112-131o141-163i170-187o202-224i236-258o268-286i298-320o361-383i404-426o456-478i	31	0.432	S	38	11	2.4.99.18	[16..701][17..484]	[Stt3][STT3]	[Asparagine N-glycosylation enzyme, membrane subunit Stt3 [Posttranslational modification, protein turnover, chaperones]; COG1287][Oligosaccharyl transferase STT3 subunit; pfam02516]	[18..38][115..135][170..190][209..229][236..259][266..286][301..321][360..380][384..404][406..426][454..474]	[transmembrane region][transmembrane region][transmembrane region][transmembrane region][transmembrane region][transmembrane region][transmembrane region][transmembrane region][transmembrane region][transmembrane region][transmembrane region]	[propagated from UniProtKB/Swiss-Prot (P46977.2)][propagated from UniProtKB/Swiss-Prot (P46977.2)][propagated from UniProtKB/Swiss-Prot (P46977.2)][propagated from UniProtKB/Swiss-Prot (P46977.2)][propagated from UniProtKB/Swiss-Prot (P46977.2)][propagated from UniProtKB/Swiss-Prot (P46977.2)][propagated from UniProtKB/Swiss-Prot (P46977.2)][propagated from UniProtKB/Swiss-Prot (P46977.2)][propag…
356	1	gi|18765729|ref|NP_003816.2|	gi|18765729|ref|NP_003816.2|	synaptosomal-associated protein 23 isoform SNAP23A [Homo sapiens]	SNAP23	2	3	3	2	0	3	18.48	0.00044689	0.570153	3	13	13	3	0	13	18.48	0.00078391	0.992347	1	4	4	1	0	4	9	0.00077834	211	23354	5	o	32	0.02	Q	0	15		[9..75][86..147][149..207]	[SNARE_SNAP23N][SNAP-25][SNARE_SNAP23C]	[N-terminal SNARE motif of SNAP23; cd15895][SNAP-25 family; pfam00835][C-terminal SNARE motif of SNAP23; cd15884]	[1][order(13,16..21,23..28,30..31,34..35,37..42,44..45,47..49,][20][23][23][24][34][48][80][83][85][87][110][order(149,151..152,155..160,162..163,166..167,169..171,][161][161][180]	[acetylation][other][phosphorylation][phosphorylation][phosphorylation][phosphorylation][phosphorylation][other][modified][modified][modified][modified][phosphorylation][other][phosphorylation][phosphorylation][other]	[N-acetylmethionine. {ECO:0000244|PubMed:19413330, ECO:0000244|PubMed:20068231, ECO:0000244|PubMed:21406692, ECO:0000244|PubMed:22223895, ECO:0000244|PubMed:22814378, ECO:0000244|PubMed:25944712, ECO:0000269|PubMed:12665801, ECO:0000269|Ref.8}; propagated from UniProtKB/Swiss-Prot (O00161.1)][heterotetramer interface [polypeptide binding]][Phosphoserine. {ECO:0000244|PubMed:24275569}; propagated …
357	2	gi|4758504|ref|NP_004484.1|;gi|83715985|ref|NP_001032900.1|	gi|4758504|ref|NP_004484.1|	3-hydroxyacyl-CoA dehydrogenase type-2 isoform 1 [Homo sapiens]	HSD17B10	1	3	3	1	0	3	6.51	0.00036128	0.569401	2	13	13	2	0	13	11.11	0.00063374	0.496845	1	2	2	1	0	2	4.6	0.00031462	261	26923	7.8	o	28	0.481	S	28	X	1.1.1.35;1.1.1.178;1.1.1.51	[7..260][9..261]	[fabG][HSD10-like_SDR_c]	[3-ketoacyl-(acyl-carrier-protein) reductase; Validated; PRK05557][17hydroxysteroid dehydrogenase type 10 (HSD10)-like, classical (c) SDRs; cd05371]	[2][order(17,20..22,41..42,63..65,91..93,120,153..155,168,172,][53][53][69][order(99..101,103,108..109,111,114..115,118,122..123,][order(99..101,108..109,111,114,118,123,126..127,130,][99][105][order(121,155,168,172)][212][212]	[acetylation][other][acetylation][modified][acetylation][other][other][acetylation][acetylation][active][acetylation][modified]	[N-acetylalanine. {ECO:0000244|PubMed:25944712}; propagated from UniProtKB/Swiss-Prot (Q99714.3)][NAD binding site [chemical binding]][N6-acetyllysine, alternate. {ECO:0000250|UniProtKB:O08756}; propagated from UniProtKB/Swiss-Prot (Q99714.3)][N6-succinyllysine, alternate. {ECO:0000250|UniProtKB:O08756}; propagated from UniProtKB/Swiss-Prot (Q99714.3)][N6-acetyllysine. {ECO:0000250|UniProtKB:O087…
358	1	gi|21361602|ref|NP_061849.2|	gi|21361602|ref|NP_061849.2|	sodium-coupled neutral amino acid transporter 2 [Homo sapiens]	SLC38A2	1	3	3	1	0	3	4.15	0.00018635	0.568807	2	13	13	2	0	13	4.35	0.00032689	2.48012	1	10	10	1	0	10	4.15	0.00081141	506	56026	8	i69-91o101-123i189-211o215-237i330-352o372-394i415-434o439-461i473-495o	2	0.055	Q	22	12		[1..96][64..486][69..495]	[Regulates protein turnover upon amino acid deprivation. {ECO:0000250}][SdaC][SLC5-6-like_sbd]	[propagated from UniProtKB/Swiss-Prot (Q96QD8.2)][Amino acid permease [Amino acid transport and metabolism]; COG0814][Solute carrier families 5 and 6-like; solute binding domain; cl00456]	[10][10][12][17][18][20][21][21][22][22][24][28][41][55][77..97][103..123][159..179][189..209][218..238][293..313][330..350][372..392][414..434][437..457][475..495]	[phosphorylation][phosphorylation][phosphorylation][phosphorylation][phosphorylation][phosphorylation][phosphorylation][phosphorylation][phosphorylation][phosphorylation][phosphorylation][phosphorylation][phosphorylation][phosphorylation][transmembrane region][transmembrane region][transmembrane region][transmembrane region][transmembrane region][transmembrane region][transmembrane region][transm…	[][Phosphoserine. {ECO:0000244|PubMed:18669648}; propagated from UniProtKB/Swiss-Prot (Q96QD8.2)][Phosphoserine. {ECO:0000244|PubMed:18669648}; propagated from UniProtKB/Swiss-Prot (Q96QD8.2)][][][][][Phosphoserine. {ECO:0000250|UniProtKB:Q8CFE6}; propagated from UniProtKB/Swiss-Prot (Q96QD8.2)][][Phosphoserine. {ECO:0000244|PubMed:19690332}; propagated from UniProtKB/Swiss-Prot (Q96QD8.2)][][][]…
359	1	gi|14589889|ref|NP_001783.2|	gi|14589889|ref|NP_001783.2|	cadherin-2 preproprotein [Homo sapiens]	CDH2	4	10	10	4	0	10	11.81	0.00034692	0.561489	7	44	44	7	0	44	12.8	0.00061792	1.02589	7	14	14	7	0	14	14.13	0.00063444	906	99809	4.8	o724-746i	26	0.72	S	26	18		[31..121][163..263][273..378][386..494][508..601][608..701][749..904]	[Cadherin_pro][CA_like][Cadherin_repeat][Cadherin_repeat][Cadherin_repeat][CA_like][Cadherin_C]	[Cadherin prodomain like; pfam08758][Cadherin repeat-like domain; cl15786][Cadherin tandem repeat domain; cd11304][Cadherin tandem repeat domain; cd11304][Cadherin tandem repeat domain; cd11304][Cadherin repeat-like domain; cl15786][Cadherin cytoplasmic region; pfam01049]	[96][135][order(170..171,226,228,259,261..262)][order(278..279,338,340,374,376..377)][order(393..394,451,453,490,492..493)][order(508..509,560,562,597,599..600)][725..745][785]	[phosphorylation][phosphorylation][other][other][other][other][transmembrane region][phosphorylation]	[Phosphoserine, by FAM20C. {ECO:0000269|PubMed:26091039}; propagated from UniProtKB/Swiss-Prot (P19022.4)][Phosphoserine, by FAM20C. {ECO:0000269|PubMed:26091039}; propagated from UniProtKB/Swiss-Prot (P19022.4)][Ca2+ binding site [ion binding]][Ca2+ binding site [ion binding]][Ca2+ binding site [ion binding]][Ca2+ binding site [ion binding]][propagated from UniProtKB/Swiss-Prot (P19022.4)][]
360	1	gi|94721252|ref|NP_919415.2|	gi|94721252|ref|NP_919415.2|	vesicle-associated membrane protein-associated protein A isoform 2 [Homo sapiens]	VAPA	3	6	4	2	2	4.8	13.25	0.0006059	0.560074	2	22	15	1	7	21.1765	5.62	0.00108208	4.59242	8	32	23	7	9	30.1379	28.92	0.00496942	249	27893	8.6	o226-248i	10	0.107	Q	18	18		[15..118]	[Motile_Sperm]	[MSP (Major sperm protein) domain; pfam00635]	[2][125][214][228..248]	[acetylation][acetylation][phosphorylation][transmembrane region]	[N-acetylalanine. {ECO:0000244|PubMed:25944712}; propagated from UniProtKB/Swiss-Prot (Q9P0L0.3)][N6-acetyllysine. {ECO:0000244|PubMed:19608861}; propagated from UniProtKB/Swiss-Prot (Q9P0L0.3)][Phosphoserine. {ECO:0000244|PubMed:24275569}; propagated from UniProtKB/Swiss-Prot (Q9P0L0.3)][propagated from UniProtKB/Swiss-Prot (Q9P0L0.3)]
361	1	gi|16579885|ref|NP_000959.2|	gi|16579885|ref|NP_000959.2|	60S ribosomal protein L4 [Homo sapiens]	RPL4	10	16	16	10	0	16	31.85	0.00117774	0.556711	13	71	71	13	0	71	33.96	0.00211561	1.45416	12	32	32	12	0	32	30.44	0.0030769	427	47697	11.1	o	35	0.04	Q	20	15		[2..372][10..265][275..353]	[PTZ00428][Ribosomal_L4][Ribos_L4_asso_C]	[60S ribosomal protein L4; Provisional][Ribosomal protein L4/L1 family; cl00325][60S ribosomal protein L4 C-terminal domain; pfam14374]	[2][14][106][295][295][333][365]	[acetylation][acetylation][acetylation][phosphorylation][phosphorylation][acetylation][phosphorylation]	[N-acetylalanine; propagated from UniProtKB/Swiss-Prot (P36578.5)][N6-acetyllysine; propagated from UniProtKB/Swiss-Prot (P36578.5)][N6-acetyllysine; propagated from UniProtKB/Swiss-Prot (P36578.5)][][Phosphoserine; propagated from UniProtKB/Swiss-Prot (P36578.5)][N6-acetyllysine; propagated from UniProtKB/Swiss-Prot (P36578.5)][Phosphoserine; propagated from UniProtKB/Swiss-Prot (P36578.5)]
362	1	gi|58218968|ref|NP_005175.2|	gi|58218968|ref|NP_005175.2|	calmodulin [Homo sapiens]	CALM3	5	57	57	5	0	57	66.44	0.0120239	0.556564	10	253	253	10	0	253	76.51	0.0216043	0.0765136	1	6	6	1	0	6	14.77	0.00165332	149	16838	4.2	o	42	0.02	Q	0	19	2.7.11.19	[1..149][12..74][85..147]	[PTZ00184][EFh][EFh]	[calmodulin; Provisional][EF-hand, calcium binding motif; A diverse superfamily of calcium sensors and calcium signal modulators; most examples in this alignment model have 2 active canonical EF hands. Ca2+ binding induces a conformational change in the EF-hand motif, leading to...; cd00051][EF-hand, calcium binding motif; A diverse superfamily of calcium sensors and calcium signal modulators; mo…	[2][order(21,23,25,32,57,59,61,68)][22][order(94,96,98,105,130,132,134,141)][95][100][100][100][102][116][139]	[acetylation][other][acetylation][other][acetylation][phosphorylation][phosphorylation][phosphorylation][phosphorylation][methylation][phosphorylation]	[N-acetylalanine; propagated from UniProtKB/Swiss-Prot (P62158.2)][Ca2+ binding site [ion binding]][N6-acetyllysine, alternate; propagated from UniProtKB/Swiss-Prot (P62158.2)][Ca2+ binding site [ion binding]][N6-acetyllysine; propagated from UniProtKB/Swiss-Prot (P62158.2)][][][Phosphotyrosine; propagated from UniProtKB/Swiss-Prot (P62158.2)][Phosphoserine; propagated from UniProtKB/Swiss-Prot (…
363	2	gi|22202629|ref|NP_665811.1|;gi|4757732|ref|NP_004199.1|	gi|22202629|ref|NP_665811.1|	apoptosis-inducing factor 1, mitochondrial isoform 2 precursor [Homo sapiens]	AIFM1	4	6	6	4	0	6	9.52	0.00030966	0.549645	7	27	27	7	0	27	16.58	0.00056409	0.118794	1	1	1	1	0	1	1.97	6.742e-05	609	66295	8.9	i62-81o	23	0.34	Q	23	X		[1..>119][146..440][298..382][461..591]	[AIF-MLS][Pyr_redox_2][Pyr_redox][AIF_C]	[Mitochondria Localisation Sequence; pfam14962][Pyridine nucleotide-disulphide oxidoreductase; pfam07992][Pyridine nucleotide-disulphide oxidoreductase; pfam00070][Apoptosis-inducing factor, mitochondrion-associated, C-term; pfam14721]
364	2	gi|19557691|ref|NP_149351.1|;gi|526118153|ref|NP_001267718.1|	gi|19557691|ref|NP_149351.1|	surfeit locus protein 4 isoform 1 [Homo sapiens]	SURF4	1	2	2	1	0	2	3.72	0.00023369	0.549296	3	9	9	3	0	9	11.9	0.00042569	8.95775	4	25	25	4	0	25	18.96	0.00381574	269	30394	7.8	o63-85i92-114o177-199i206-225o240-262i	39	0.104	Q	0	9		[4..269][266..269]	[SURF4][Di-lysine motif]	[SURF4 family; pfam02077][propagated from UniProtKB/Swiss-Prot (O15260.3)]	[64..84][92..112][179..199][203..223][239..259]	[transmembrane region][transmembrane region][transmembrane region][transmembrane region][transmembrane region]	[propagated from UniProtKB/Swiss-Prot (O15260.3)][propagated from UniProtKB/Swiss-Prot (O15260.3)][propagated from UniProtKB/Swiss-Prot (O15260.3)][propagated from UniProtKB/Swiss-Prot (O15260.3)][propagated from UniProtKB/Swiss-Prot (O15260.3)]
365	2	gi|260763904|ref|NP_001159409.1|;gi|260763906|ref|NP_001159410.1|	gi|260763904|ref|NP_001159409.1|	stAR-related lipid transfer protein 3 isoform 2 [Homo sapiens]	STARD3	1	2	2	1	0	2	4.49	0.00014126	0.548638	1	9	9	1	0	9	4.49	0.00025733	1.4358	1	4	4	1	0	4	4.49	0.00036906	445	49960	9.5						17		[47..215][233..441]	[MENTAL][START_STARD3-like]	[Cholesterol-capturing domain; pfam10457][Cholesterol-binding START domain of mammalian STARD3 and related proteins; cd08906]	[order(262..263,271,283,285,296,300,307,310..311,313..314,]	[other]	[putative lipid binding site [chemical binding]]
366	1	gi|56237029|ref|NP_002196.2|	gi|56237029|ref|NP_002196.2|	integrin alpha-5 precursor [Homo sapiens]		4	12	12	4	0	12	4.96	0.00035955	0.53973	3	55	55	3	0	55	4.19	0.0006671	0.293853	2	5	5	2	0	5	2.76	0.0001957	1049	114536	5.8	o999-1021i	42	0.505	S	42
367	4	gi|189409120|ref|NP_001121599.1|;gi|326381123|ref|NP_001191948.1|;gi|42794763|ref|NP_976325.1|;gi|4504007|ref|NP_000158.1|	gi|189409120|ref|NP_001121599.1|	glycerol kinase isoform c [Homo sapiens]	GK	2	3	3	2	0	3	5.61	0.00017051	0.531056	5	14	14	5	0	14	16.09	0.00032211	0.92236	2	4	4	2	0	4	5.61	0.00029698	553	60593	6.3						X	2.7.1.30	[11..513][11..513]	[glycerol_kin][FGGY_GK1-3_metazoa]	[glycerol kinase; TIGR01311][Metazoan glycerol kinase 1 and 3-like proteins; belongs to the FGGY family of carbohydrate kinases; cd07792]	[order(12..13,15,17,20..21,24..26,28..29,33,35,51,86..91,][order(17,19..22,24,93..95,114,148,259..260,279..281,284,][order(17,19..22,24,259,279..281,326..327,329..330,][order(17,20,259)][order(17,259)][order(41,58..59,61..62,65..66,69..70,106,185,188,244..245)][order(47,50,53,115,324,327,331,334,357,359,364,376..385,][order(94..95,114,148,259)]	[other][active][other][active][metal-binding][other][other][other]	[putative N- and C-terminal domain interface [polypeptide binding]][][MgATP binding site [chemical binding]][catalytic site [active]][metal binding site [ion binding]][putative homotetramer interface [polypeptide binding]][putative homodimer interface [polypeptide binding]][putative glycerol binding site [chemical binding]]
368	1	gi|24234688|ref|NP_004125.3|	gi|24234688|ref|NP_004125.3|	stress-70 protein, mitochondrial precursor [Homo sapiens]	HSPA9	17	48	48	17	0	48	32.7	0.00222192	0.517828	23	229	229	23	0	229	42.42	0.00429112	0.0281986	1	2	2	1	0	2	2.8	0.00012093	679	73681	6.2	o	25	0.306	S	25	5		[52..673][52..428]	[dnaK][HSPA9-like_NBD]	[molecular chaperone DnaK; Provisional; PRK00290][Nucleotide-binding domain of human HSPA9, Escherichia coli DnaK, and similar proteins; cd11733]	[order(61..64,121,222,246..247,249,275,313,316,320,][76][order(79,82,100,104,107..108,110..111,180..183,303,][135][135][138][138][143][order(199..200,202..203,218..219,221,262..265)][200][206][206][234][288][300][300][368][394][487][567][567][568][600][600][610][612][646][646]	[other][acetylation][other][acetylation][modified][acetylation][modified][acetylation][other][phosphorylation][acetylation][modified][acetylation][acetylation][acetylation][modified][modified][modified][modified][acetylation][modified][phosphorylation][acetylation][modified][modified][acetylation][acetylation][modified]	[nucleotide binding site [chemical binding]][N6-acetyllysine. {ECO:0000250|UniProtKB:P38647}; propagated from UniProtKB/Swiss-Prot (P38646.2)][NEF interaction site [polypeptide binding]][N6-acetyllysine, alternate. {ECO:0000244|PubMed:19608861}; propagated from UniProtKB/Swiss-Prot (P38646.2)][N6-succinyllysine, alternate. {ECO:0000250|UniProtKB:P38647}; propagated from UniProtKB/Swiss-Prot (P386…
369	1	gi|45387945|ref|NP_065779.1|	gi|45387945|ref|NP_065779.1|	extended synaptotagmin-2 [Homo sapiens]	ESYT2	3	6	6	3	0	6	5.38	0.00021118	0.510896	7	29	29	7	0	29	12.32	0.00041319	3.33898	6	30	30	6	0	30	10.75	0.00137931	893	98902	8.7	i98-120o	10	0.094	Q	43	7		[357..477][509..614][758..883]	[C2A_C2C_Synaptotagmin_like][C2B_Synaptotagmin-like][C2C_KIAA1228]	[C2 domain first and third repeat in Synaptotagmin-like proteins; cd08391][C2 domain second repeat present in Synaptotagmin-like proteins; cd04050][C2 domain third repeat present in uncharacterized human KIAA1228-like proteins; cd04030]	[order(385,432,434,439)][725][727][730][733]	[other][phosphorylation][phosphorylation][phosphorylation][phosphorylation]	[Ca2+ binding site [ion binding]][][][][]
370	1	gi|24638433|ref|NP_056146.1|	gi|24638433|ref|NP_056146.1|	nicastrin precursor [Homo sapiens]	NCSTN	1	2	2	1	0	2	1.69	8.866e-05	0.497207	1	10	10	1	0	10	1.69	0.00017946	0.648045	1	2	2	1	0	2	1.69	0.00011582	709	78411	6	o670-692i	34	0.623	S	34	1		[175..482]	[M28_Nicastrin]	[M28 Zn-Peptidase Nicastrin, a main component of gamma-secretase complex; cd03881]	[336..340][670..690]	[other][transmembrane region]	[DYIGS region][propagated from UniProtKB/Swiss-Prot (Q92542.2)]
371	1	gi|78000183|ref|NP_001030168.1|	gi|78000183|ref|NP_001030168.1|	60S ribosomal protein L14 [Homo sapiens]	RPL14	1	6	6	1	0	6	5.58	0.00087714	0.494085	2	30	30	2	0	30	10.23	0.00177537	0.753239	2	7	7	2	0	7	10.23	0.00133675	215	23432	10.9	o	37	0.158	Q	27	3		[7..81][47..122][171..190][193..198]	[KOW_RPL14][Ribosomal_L14e][4 X 5 AA tandem repeats of Q-K-A-[PAS]-X][2 X 3 AA tandem repeats of K-[GA]-Q]	[KOW motif of Ribosomal Protein L14; cd06088][Ribosomal protein L14; pfam01929][propagated from UniProtKB/Swiss-Prot (P50914.4)][propagated from UniProtKB/Swiss-Prot (P50914.4)]	[order(14,16..17,29,32,34..35,51,53..54,56,66,69,71..72)][79][85][139][139]	[other][acetylation][acetylation][phosphorylation][phosphorylation]	[RNA binding site [nucleotide binding]][N6-acetyllysine; propagated from UniProtKB/Swiss-Prot (P50914.4)][N6-acetyllysine, alternate; propagated from UniProtKB/Swiss-Prot (P50914.4)][][Phosphoserine; propagated from UniProtKB/Swiss-Prot (P50914.4)]
372	1	gi|8923930|ref|NP_060934.1|	gi|8923930|ref|NP_060934.1|	CDGSH iron-sulfur domain-containing protein 1 [Homo sapiens]	CISD1	1	1	1	1	0	1	13.89	0.00029103	0.494058	1	5	5	1	0	5	13.89	0.00058905	1.29032	1	2	2	1	0	2	13.89	0.00076032	108	12199	9.1	o13-35i	26	0.424	S	26	10		[<12..41][55..93]	[MitoNEET_N][ZnF_CDGSH]	[Iron-containing outer mitochondrial membrane protein N-terminus; pfam10660][CDGSH-type zinc finger. Function unknown; smart00704]	[2][14..31]	[acetylation][transmembrane region]	[N-acetylserine; propagated from UniProtKB/Swiss-Prot (Q9NZ45.1)][propagated from UniProtKB/Swiss-Prot (Q9NZ45.1)]
373	3	gi|148746199|ref|NP_001092047.1|;gi|153252132|ref|NP_001093163.1|;gi|4506633|ref|NP_000984.1|	gi|148746199|ref|NP_001092047.1|	60S ribosomal protein L31 isoform 2 [Homo sapiens]	RPL31	1	2	2	1	0	2	10.94	0.00049111	0.493964	2	10	10	2	0	10	17.97	0.00099402	0.967807	1	3	3	1	0	3	10.94	0.00096228	128	14632	10.8	o	16	0.022	Q	0	2		[17..100]	[Ribosomal_L31e]	[Eukaryotic/archaeal ribosomal protein L31; cd00463]	[1][order(28,38..40,42..44,46..47,50,55..56,62..65,69..70,][75][98][98][103]	[acetylation][other][acetylation][phosphorylation][phosphorylation][phosphorylation]	[N-acetylmethionine; propagated from UniProtKB/Swiss-Prot (P62899.1)][23S rRNA binding site [nucleotide binding]][N6-acetyllysine, alternate; propagated from UniProtKB/Swiss-Prot (P62899.1)][][Phosphoserine; propagated from UniProtKB/Swiss-Prot (P62899.1)][]
374	1	gi|16933567|ref|NP_005361.2|	gi|16933567|ref|NP_005361.2|	ras-related protein Rab-8A [Homo sapiens]	RAB8A	1	5	5	1	0	5	6.76	0.0007592	0.493819	2	25	25	2	0	25	12.56	0.00153665	1.29018	2	10	10	2	0	10	12.56	0.00198345	207	23668	9.1	o	21	0.256	Q	21	19		[6..172][10..170][37..45]	[Rab8_Rab10_Rab13_like][Ras][Effector region (By similarity)]	[Rab GTPase families 8, 10, 13 (Rab8, Rab10, Rab13); cd01867][Ras family; pfam00071][propagated from UniProtKB/Swiss-Prot (P61006.1)]	[6..10][15..22][order(17..23,33..36,39..40,66,121..122,124..125,152..153)][order(23..35,37..39)][order(33,38..46)][order(36,38,42..49,56,58)][40][order(41,43..45,60,62,69..70,73,77,79..82,169)][order(41..42,44,62..63,70,72,74..76)][41..45][58..62][63..66][order(66,68..78)][69..74][77..81][86..91][109..118][121..124][151..153][167..172][181][181][185][185]	[other][other][other][other][other][other][other][other][other][other][other][other][other][other][other][other][other][other][other][other][phosphorylation][phosphorylation][phosphorylation][phosphorylation]	[Rab subfamily motif 1 (RabSF1)][G1 box][GTP/Mg2+ binding site [chemical binding]][Rab subfamily motif 2 (RabSF2)][Switch I region][GEF interaction site [polypeptide binding]][G2 box][putative effector interaction site][putative GDI interaction site [polypeptide binding]][Rab family motif 1 (RabF1)][Rab family motif 2 (RabF2)][G3 box][Switch II region][Rab family motif 3 (RabF3)][Rab family motif…
375	3	gi|194097401|ref|NP_001123492.1|;gi|194097403|ref|NP_001123493.1|;gi|19913418|ref|NP_005168.2|	gi|194097401|ref|NP_001123492.1|	V-type proton ATPase 116 kDa subunit a isoform 1 isoform a [Homo sapiens]	ATP6V0A1	3	4	4	3	0	4	5.97	0.00015003	0.493421	7	20	20	7	0	20	11.34	0.00030366	2.41776	6	15	15	6	0	15	10.98	0.00073492	838	96600	6.6						17	3.6.3.14	[26..829]	[V_ATPase_I]	[V-type ATPase 116kDa subunit family; pfam01496]	[257][371][396..414][417..433][449..478][542..561][580..600][646..665][726..750][772..810]	[phosphorylation][phosphorylation][transmembrane region][transmembrane region][transmembrane region][transmembrane region][transmembrane region][transmembrane region][transmembrane region][transmembrane region]	[Phosphothreonine. {ECO:0000250|UniProtKB:Q9Z1G4}; propagated from UniProtKB/Swiss-Prot (Q93050.3)][Phosphotyrosine. {ECO:0000250|UniProtKB:Q9Z1G4}; propagated from UniProtKB/Swiss-Prot (Q93050.3)][propagated from UniProtKB/Swiss-Prot (Q93050.3)][propagated from UniProtKB/Swiss-Prot (Q93050.3)][propagated from UniProtKB/Swiss-Prot (Q93050.3)][propagated from UniProtKB/Swiss-Prot (Q93050.3)][propa…
376	1	gi|15431297|ref|NP_000968.2|	gi|15431297|ref|NP_000968.2|	60S ribosomal protein L13 isoform 1 [Homo sapiens]	RPL13	1	1	1	1	0	1	5.21	0.00014896	0.493377	2	5	5	2	0	5	9	0.0003015	1.93377	2	3	3	2	0	3	9	0.00058375	211	24261	11.7	o	3	0.14	Q	64	16	3.6.5.3	[7..185]	[Ribosomal_L13e]	[Ribosomal protein L13e; pfam01294]	[16][77][106][132][177]	[acetylation][phosphorylation][phosphorylation][phosphorylation][acetylation]	[N6-acetyllysine; propagated from UniProtKB/Swiss-Prot (P26373.4)][Phosphoserine; propagated from UniProtKB/Swiss-Prot (P26373.4)][Phosphoserine; propagated from UniProtKB/Swiss-Prot (P26373.4)][][N6-acetyllysine; propagated from UniProtKB/Swiss-Prot (P26373.4)]
377	3	gi|269954690|ref|NP_001093422.2|;gi|269954692|ref|NP_002213.5|;gi|269954694|ref|NP_001161744.1|	gi|269954690|ref|NP_001093422.2|	inositol 1,4,5-trisphosphate receptor type 1 isoform 1 [Homo sapiens]	ITPR1	1	2	2	1	0	2	0.63	2.32e-05	0.489362	3	10	10	3	0	10	1.92	4.695e-05	15.7872	22	49	49	22	0	49	11.55	0.00074237	2710	308538	6.2						3		[4..225][231..287][232..433][265..269][294..>321][472..677][508..511][567..569][1176..1355][1923..2035][2233..>2423][2320..2549][2424..2489]	[Ins145_P3_rec][MIR][MIR][Inositol 1,4,5-trisphosphate binding. {ECO:0000250}][MIR][RYDR_ITPR][Inositol 1,4,5-trisphosphate binding. {ECO:0000250}][Inositol 1,4,5-trisphosphate binding. {ECO:0000250}][RYDR_ITPR][RIH_assoc][YdiL][Ion_trans][Interaction with ERP44. {ECO:0000250}]	[Inositol 1,4,5-trisphosphate/ryanodine receptor; pfam08709][Domain in ryanodine and inositol trisphosphate receptors and protein O-mannosyltransferases; smart00472][MIR domain; pfam02815][propagated from UniProtKB/Swiss-Prot (Q14643.3)][Domain in ryanodine and inositol trisphosphate receptors and protein O-mannosyltransferases; smart00472][RIH domain; pfam01365][propagated from UniProtKB/Swiss-P…	[482][1589][1716][2235..2255][2267..2287][2314..2334][2358..2378][2401..2421][2530..2550][2616]	[phosphorylation][phosphorylation][phosphorylation][transmembrane region][transmembrane region][transmembrane region][transmembrane region][transmembrane region][transmembrane region][phosphorylation]	[Phosphotyrosine. {ECO:0000255}; propagated from UniProtKB/Swiss-Prot (Q14643.3)][Phosphoserine. {ECO:0000244|PubMed:17081983, ECO:0000244|PubMed:18669648, ECO:0000244|PubMed:20068231, ECO:0000244|PubMed:24275569}; propagated from UniProtKB/Swiss-Prot (Q14643.3)][Phosphoserine. {ECO:0000244|PubMed:18669648}; propagated from UniProtKB/Swiss-Prot (Q14643.3)][propagated from UniProtKB/Swiss-Prot (Q1…
[truncated: 1,321 more rows]
[truncated: 1 more columns]
